# Supplementary material for: Genetic associations with carotid intima-media thickness link to atherosclerosis biology with sex-differences in sub-Saharan Africans
Source: Research Square preprint supplement (doi:10.21203/rs.3.rs-147838/v1), 2021-01-22
Supplement: Supplementary file 1 [file 1e031188db842dff487d04d4.xlsx]

## Sheet: GS
Category	GeneSet	N_genes	N_overlap	p	adjP	genes	link
GWAScatalog	Chloride levels	25	3	2.918559719424044e-06	0.004386595258294338	BDNF-AS:BDNF:KIF18A	www.ncbi.nlm.nih.gov/pubmed/29403010
GWAScatalog	Spherical equivalent or myopia (age of diagnosis)	175	4	4.383318903071067e-05	0.02629956559344128	METTL15:KCNA4:ARL14EP:GPC6	www.ncbi.nlm.nih.gov/pubmed/29808027
GWAScatalog	Body mass index (SNP x SNP interaction)	11	2	6.652094273886413e-05	0.02629956559344128	BDNF-AS:BDNF	www.ncbi.nlm.nih.gov/pubmed/22344221
GWAScatalog	Hip circumference	71	3	6.999219053477386e-05	0.02629956559344128	LIN7C:BDNF-AS:BDNF	www.ncbi.nlm.nih.gov/pubmed/25673412
GWAScatalog	Menarche (age at onset)	216	4	9.90968355465847e-05	0.02978850876530336	LIN7C:BDNF-AS:BDNF:KCNA4	www.ncbi.nlm.nih.gov/pubmed/21102462
GWAScatalog	Bone mineral density (paediatric, skull)	18	2	0.00018413610669504364	0.03653558460832553	CCDC34:LIN7C	www.ncbi.nlm.nih.gov/pubmed/24945404
GWAScatalog	BMI in smokers	19	2	0.00020565384589825834	0.03653558460832553	BDNF-AS:BDNF	www.ncbi.nlm.nih.gov/pubmed/28443625
GWAScatalog	Body mass index (adult)	21	2	0.0002522008124518404	0.03653558460832553	BDNF-AS:BDNF	www.ncbi.nlm.nih.gov/pubmed/28430825
GWAScatalog	Coffee consumption (cups per day)	22	2	0.00027722502294173117	0.03653558460832553	BDNF-AS:BDNF	www.ncbi.nlm.nih.gov/pubmed/25288136
GWAScatalog	Response to fenofibrate (HDL cholesterol levels)	22	2	0.00027722502294173117	0.03653558460832553	LINC00348:DACH1	www.ncbi.nlm.nih.gov/pubmed/27002377
GWAScatalog	Smoking behavior	24	2	0.0003307623857664026	0.03653558460832553	BDNF-AS:BDNF	www.ncbi.nlm.nih.gov/pubmed/22006218
GWAScatalog	Childhood body mass index	25	2	0.0003592705445133873	0.03653558460832553	BDNF-AS:BDNF	www.ncbi.nlm.nih.gov/pubmed/26604143
GWAScatalog	Survival in pancreatic cancer	25	2	0.0003592705445133873	0.03653558460832553	LIN7C:BDNF-AS	www.ncbi.nlm.nih.gov/pubmed/28470677
GWAScatalog	Scalp hair shape	25	2	0.0003592705445133873	0.03653558460832553	RBBP8:MIR4741	www.ncbi.nlm.nih.gov/pubmed/26926045
GWAScatalog	Body mass index in physically inactive individuals	26	2	0.00038893503242395775	0.03653558460832553	BDNF-AS:BDNF	www.ncbi.nlm.nih.gov/pubmed/28448500
GWAScatalog	Weight	26	2	0.00038893503242395775	0.03653558460832553	BDNF-AS:BDNF	www.ncbi.nlm.nih.gov/pubmed/20966902
Chemical_and_Genetic_pertubation	RAMASWAMY_METASTASIS_UP	66	5	1.1362025820997339e-08	3.900583464348387e-05	TMEM147:RBM42:ETV2:COX6B1:UPK1A	http://www.broadinstitute.org/gsea/msigdb/cards/RAMASWAMY_METASTASIS_UP
Chemical_and_Genetic_pertubation	LIN_NPAS4_TARGETS_DN	68	4	1.0302574798169255e-06	0.0017684369641057529	SORCS3:BDNF:KIF18A:KCNA4	http://www.broadinstitute.org/gsea/msigdb/cards/LIN_NPAS4_TARGETS_DN
GO_cc	GO_SCHMIDT_LANTERMAN_INCISURE	11	2	6.652094273886413e-05	0.03672445397596953	MAG:AKR1B1	http://www.broadinstitute.org/gsea/msigdb/cards/GO_SCHMIDT_LANTERMAN_INCISURE
GO_cc	GO_COMPACT_MYELIN	15	2	0.00012663604819299838	0.03672445397596953	MAG:AKR1B1	http://www.broadinstitute.org/gsea/msigdb/cards/GO_COMPACT_MYELIN
Positional_gene_sets	chr11p14	28	7	1.4337127298776211e-15	4.673903499401045e-13	CCDC34:LIN7C:BDNF-AS:BDNF:KIF18A:METTL15:KCNA4	http://www.broadinstitute.org/gsea/msigdb/cards/chr11p14
Positional_gene_sets	chr19q13	849	10	2.3148842678435787e-08	3.7732613565850333e-06	USF2:MAG:GAPDHS:TMEM147:ATP4A:HAUS5:RBM42:ETV2:COX6B1:UPK1A	http://www.broadinstitute.org/gsea/msigdb/cards/chr19q13
Positional_gene_sets	chr7q33	26	2	0.00038893503242395775	0.04226427352340341	CALD1:C7orf49	http://www.broadinstitute.org/gsea/msigdb/cards/chr7q33
Cancer_gene_neighborhoods	MORF_RBM8A	84	3	0.00011551919058469316	0.04932669437966398	RBBP8:MAG:HAUS5	http://www.broadinstitute.org/gsea/msigdb/cards/MORF_RBM8A
Curated_gene_sets	RAMASWAMY_METASTASIS_UP	66	5	1.1362025820997339e-08	5.410596695958933e-05	TMEM147:RBM42:ETV2:COX6B1:UPK1A	http://www.broadinstitute.org/gsea/msigdb/cards/RAMASWAMY_METASTASIS_UP
Curated_gene_sets	LIN_NPAS4_TARGETS_DN	68	4	1.0302574798169255e-06	0.0024530430594440996	SORCS3:BDNF:KIF18A:KCNA4	http://www.broadinstitute.org/gsea/msigdb/cards/LIN_NPAS4_TARGETS_DN
microRNA_targets	ACAACTT_MIR382	71	3	6.999219053477386e-05	0.015468274108185022	SORCS3:BDNF:DACH1	http://www.broadinstitute.org/gsea/msigdb/cards/ACAACTT_MIR382
