# Supplementary material for: Genetic associations with carotid intima-media thickness link to atherosclerosis biology with sex-differences in sub-Saharan Africans
Source: Research Square preprint supplement (doi:10.21203/rs.3.rs-147838/v1), 2021-01-22
Supplement: Supplementary file 2 [file 27763ad91db5c865926b09f2.xlsx]

## Sheet: GS
Category	GeneSet	N_genes	N_overlap	p	adjP	genes	link
Chemical_and_Genetic_pertubation	NIKOLSKY_BREAST_CANCER_17Q11_Q21_AMPLICON	132	10	2.45600297735099e-16	8.43145822124595e-13	RAPGEFL1:CDC6:RARA:TOP2A:IGFBP4:SMARCE1:KRT222:KRT222:KRT24:TMEM99:KRT20	http://www.broadinstitute.org/gsea/msigdb/cards/NIKOLSKY_BREAST_CANCER_17Q11_Q21_AMPLICON
Chemical_and_Genetic_pertubation	DUTERTRE_ESTRADIOL_RESPONSE_6HR_UP	229	5	5.593120502125875e-06	0.009600591341899065	RAPGEFL1:CDC6:RARA:IGFBP4:KRT13	http://www.broadinstitute.org/gsea/msigdb/cards/DUTERTRE_ESTRADIOL_RESPONSE_6HR_UP
Chemical_and_Genetic_pertubation	FRASOR_RESPONSE_TO_ESTRADIOL_UP	37	3	9.768559515901286e-06	0.011178488272696371	CDC6:TOP2A:IGFBP4	http://www.broadinstitute.org/gsea/msigdb/cards/FRASOR_RESPONSE_TO_ESTRADIOL_UP
Chemical_and_Genetic_pertubation	BHAT_ESR1_TARGETS_VIA_AKT1_UP	279	5	1.4530919692237624e-05	0.012471161825862942	RAPGEFL1:CDC6:RARA:IGFBP4:KRT13	http://www.broadinstitute.org/gsea/msigdb/cards/BHAT_ESR1_TARGETS_VIA_AKT1_UP
Chemical_and_Genetic_pertubation	DUTERTRE_ESTRADIOL_RESPONSE_24HR_UP	322	5	2.887201870985998e-05	0.017609429228834125	RAPGEFL1:CDC6:TOP2A:IGFBP4:KRT13	http://www.broadinstitute.org/gsea/msigdb/cards/DUTERTRE_ESTRADIOL_RESPONSE_24HR_UP
Chemical_and_Genetic_pertubation	GYORFFY_MITOXANTRONE_RESISTANCE	54	3	3.077674785115198e-05	0.017609429228834125	TOP2A:SMARCE1:TMEM99	http://www.broadinstitute.org/gsea/msigdb/cards/GYORFFY_MITOXANTRONE_RESISTANCE
Chemical_and_Genetic_pertubation	BHAT_ESR1_TARGETS_NOT_VIA_AKT1_UP	211	4	9.053679050326003e-05	0.04440182882824167	RAPGEFL1:CDC6:RARA:IGFBP4	http://www.broadinstitute.org/gsea/msigdb/cards/BHAT_ESR1_TARGETS_NOT_VIA_AKT1_UP
GO_cc	GO_INTERMEDIATE_FILAMENT	196	9	8.476634303773295e-13	4.916447896188511e-10	KRT222:KRT222:KRT24:KRT20:KRTAP3-3:KRTAP9-6:KRTAP9-7:KRT31:KRT13:KRT19	http://www.broadinstitute.org/gsea/msigdb/cards/GO_INTERMEDIATE_FILAMENT
GO_cc	GO_INTERMEDIATE_FILAMENT_CYTOSKELETON	238	9	4.868491086295665e-12	1.4118624150257427e-09	KRT222:KRT222:KRT24:KRT20:KRTAP3-3:KRTAP9-6:KRTAP9-7:KRT31:KRT13:KRT19	http://www.broadinstitute.org/gsea/msigdb/cards/GO_INTERMEDIATE_FILAMENT_CYTOSKELETON
GO_cc	GO_CYTOSKELETON	1955	14	1.1468412850621463e-08	2.217226484453483e-06	MYO9A:C16orf45:CDC6:RARA:TOP2A:KRT222:KRT222:KRT24:KRT20:KRTAP3-3:KRTAP9-6:KRTAP9-7:KRT31:KRT13:KRT19	http://www.broadinstitute.org/gsea/msigdb/cards/GO_CYTOSKELETON
GO_cc	GO_CYTOSKELETAL_PART	1427	12	2.9294717790599355e-08	4.247734079636907e-06	MYO9A:CDC6:TOP2A:KRT222:KRT222:KRT24:KRT20:KRTAP3-3:KRTAP9-6:KRTAP9-7:KRT31:KRT13:KRT19	http://www.broadinstitute.org/gsea/msigdb/cards/GO_CYTOSKELETAL_PART
GO_cc	GO_SUPRAMOLECULAR_FIBER	667	9	4.100820312208217e-08	4.756951562161532e-06	KRT222:KRT222:KRT24:KRT20:KRTAP3-3:KRTAP9-6:KRTAP9-7:KRT31:KRT13:KRT19	http://www.broadinstitute.org/gsea/msigdb/cards/GO_SUPRAMOLECULAR_FIBER
GO_cc	GO_KERATIN_FILAMENT	94	4	3.778211176779563e-06	0.00036522708042202443	KRTAP3-3:KRTAP9-6:KRTAP9-7:KRT13	http://www.broadinstitute.org/gsea/msigdb/cards/GO_KERATIN_FILAMENT
Hallmark_gene_sets	HALLMARK_ESTROGEN_RESPONSE_EARLY	199	6	8.897945821646276e-08	2.2244864554115692e-06	THSD4:RAPGEFL1:RARA:IGFBP4:KRT13:KRT19	http://www.broadinstitute.org/gsea/msigdb/cards/HALLMARK_ESTROGEN_RESPONSE_EARLY
Hallmark_gene_sets	HALLMARK_ESTROGEN_RESPONSE_LATE	199	6	8.897945821646276e-08	2.2244864554115692e-06	RAPGEFL1:CDC6:TOP2A:IGFBP4:KRT13:KRT19	http://www.broadinstitute.org/gsea/msigdb/cards/HALLMARK_ESTROGEN_RESPONSE_LATE
Positional_gene_sets	chr17q12	115	8	6.139031321098423e-13	1.6866932340619418e-10	RARA:IGFBP4:KRTAP3-3:KRTAP9-6:KRTAP9-11P:KRTAP9-7:KRT31:KRT41P	http://www.broadinstitute.org/gsea/msigdb/cards/chr17q12
Positional_gene_sets	chr17q21	302	10	1.0347811251913754e-12	1.6866932340619418e-10	RAPGEFL1:CDC6:TOP2A:SMARCE1:KRT222:KRT222:TMEM99:KRT20:KRTAP9-7:KRT13:KRT19	http://www.broadinstitute.org/gsea/msigdb/cards/chr17q21
Positional_gene_sets	chr15q23	34	3	7.540649781302497e-06	0.0008194172762348713	THSD4:CT62:GRAMD2	http://www.broadinstitute.org/gsea/msigdb/cards/chr15q23
GO_mf	GO_STRUCTURAL_MOLECULE_ACTIVITY	718	7	1.3155919959414208e-05	0.011853483883432202	KRT222:KRT222:KRT24:KRT20:KRTAP3-3:KRT31:KRT13:KRT19	http://www.broadinstitute.org/gsea/msigdb/cards/GO_STRUCTURAL_MOLECULE_ACTIVITY
Curated_gene_sets	NIKOLSKY_BREAST_CANCER_17Q11_Q21_AMPLICON	132	10	2.45600297735099e-16	1.1695486178145415e-12	RAPGEFL1:CDC6:RARA:TOP2A:IGFBP4:SMARCE1:KRT222:KRT222:KRT24:TMEM99:KRT20	http://www.broadinstitute.org/gsea/msigdb/cards/NIKOLSKY_BREAST_CANCER_17Q11_Q21_AMPLICON
Curated_gene_sets	DUTERTRE_ESTRADIOL_RESPONSE_6HR_UP	229	5	5.593120502125875e-06	0.013317219915561708	RAPGEFL1:CDC6:RARA:IGFBP4:KRT13	http://www.broadinstitute.org/gsea/msigdb/cards/DUTERTRE_ESTRADIOL_RESPONSE_6HR_UP
Curated_gene_sets	FRASOR_RESPONSE_TO_ESTRADIOL_UP	37	3	9.768559515901286e-06	0.01550596013824064	CDC6:TOP2A:IGFBP4	http://www.broadinstitute.org/gsea/msigdb/cards/FRASOR_RESPONSE_TO_ESTRADIOL_UP
Curated_gene_sets	BHAT_ESR1_TARGETS_VIA_AKT1_UP	279	5	1.4530919692237624e-05	0.01729905989360889	RAPGEFL1:CDC6:RARA:IGFBP4:KRT13	http://www.broadinstitute.org/gsea/msigdb/cards/BHAT_ESR1_TARGETS_VIA_AKT1_UP
Curated_gene_sets	DUTERTRE_ESTRADIOL_RESPONSE_24HR_UP	322	5	2.887201870985998e-05	0.02442647887786429	RAPGEFL1:CDC6:TOP2A:IGFBP4:KRT13	http://www.broadinstitute.org/gsea/msigdb/cards/DUTERTRE_ESTRADIOL_RESPONSE_24HR_UP
Curated_gene_sets	GYORFFY_MITOXANTRONE_RESISTANCE	54	3	3.077674785115198e-05	0.02442647887786429	TOP2A:SMARCE1:TMEM99	http://www.broadinstitute.org/gsea/msigdb/cards/GYORFFY_MITOXANTRONE_RESISTANCE
Cancer_modules	MODULE_486	99	3	0.00018796884091814003	0.044474026204331385	MYO9A:CDC6:RARA	http://www.broadinstitute.org/gsea/msigdb/cards/MODULE_486
Cancer_modules	MODULE_68	26	2	0.00038893503242395775	0.044474026204331385	KRT13:KRT19	http://www.broadinstitute.org/gsea/msigdb/cards/MODULE_68
Cancer_modules	MODULE_298	26	2	0.00038893503242395775	0.044474026204331385	KRT13:KRT19	http://www.broadinstitute.org/gsea/msigdb/cards/MODULE_298
Cancer_modules	MODULE_44	314	4	0.00041275198333486204	0.044474026204331385	KIAA0430:IGFBP4:KRT31:KRT19	http://www.broadinstitute.org/gsea/msigdb/cards/MODULE_44
