# Supplementary material for: Genetic associations with carotid intima-media thickness link to atherosclerosis biology with sex-differences in sub-Saharan Africans
Source: Research Square preprint supplement (doi:10.21203/rs.3.rs-147838/v1), 2021-01-22
Supplement: Supplementary file 4 [file 577d259ed6654ca392acf7d1.xlsx]

## Sheet: GS
Category	GeneSet	N_genes	N_overlap	p	adjP	genes	link
Chemical_and_Genetic_pertubation	ACEVEDO_LIVER_CANCER_WITH_H3K27ME3_UP	288	5	8.683301988604478e-07	0.0029809775726879176	GPR116:GPR111:GPR115:C6orf141:CRISP2	http://www.broadinstitute.org/gsea/msigdb/cards/ACEVEDO_LIVER_CANCER_WITH_H3K27ME3_UP
Positional_gene_sets	chr6p12	70	11	6.424655065549202e-25	2.0944375513690396e-22	CLIC5:RCAN2:MEP1A:GPR116:CD2AP:GPR111:GPR115:OPN5:PTCHD4:CENPQ:C6orf141	http://www.broadinstitute.org/gsea/msigdb/cards/chr6p12
Curated_gene_sets	ACEVEDO_LIVER_CANCER_WITH_H3K27ME3_UP	288	5	8.683301988604478e-07	0.004134988406973452	GPR116:GPR111:GPR115:C6orf141:CRISP2	http://www.broadinstitute.org/gsea/msigdb/cards/ACEVEDO_LIVER_CANCER_WITH_H3K27ME3_UP
microRNA_targets	ACTGTGA_MIR27A_MIR27B	473	4	0.00020090982753802092	0.04440107188590262	GSPT1:RCAN2:CD2AP:ELMO1	http://www.broadinstitute.org/gsea/msigdb/cards/ACTGTGA_MIR27A_MIR27B
