# Supplementary material for: Genetic associations with carotid intima-media thickness link to atherosclerosis biology with sex-differences in sub-Saharan Africans
Source: Research Square preprint supplement (doi:10.21203/rs.3.rs-147838/v1), 2021-01-22
Supplement: Supplementary file 6 [file 7bcda79b91173720111a159c.xlsx]

## Sheet: Supp_Table_35b_GeneMap_Female
ensg	symbol	chr	start	end	strand	type	entrezID	HUGO	pLI	ncRVIS	posMapSNPs	posMapMaxCADD	eqtlMapSNPs	eqtlMapminP	eqtlMapminQ	eqtlMapts	eqtlDirection	ciMap	ciMapts	minGwasP	IndSigSNPs	GenomicLocus
ENSG00000144642	RBMS3	3	29322473	30051886	1	protein_coding	27303	RBMS3	0.741403241313464	1.268693313	1	14.08	0	NA	NA	NA	NA	No	NA	0.0018	rs9830575	12
ENSG00000243295	CTD-2185K10.1	3	59050876	59105235	1	lincRNA	NA	NA	NA	NA	2	22.7	0	NA	NA	NA	NA	No	NA	3.6e-05	rs143438401	13
ENSG00000156931	VPS8	3	184529931	184770402	1	protein_coding	23355	VPS8	3.61819753295781e-06	0.648945958	1	18.37	0	NA	NA	NA	NA	No	NA	1.7e-05	rs116831376	14
ENSG00000145216	FIP1L1	4	54243810	55161439	1	protein_coding	81608	FIP1L1	0.600789667366506	-0.155881555	1	15.51	0	NA	NA	NA	NA	No	NA	4.5e-07	rs184055133	19
ENSG00000072201	LNX1	4	54325468	54567572	-1	protein_coding	84708	LNX1	0.0072436266198218	-0.240621649	1	15.51	0	NA	NA	NA	NA	No	NA	4.5e-07	rs184055133	19
ENSG00000172728	FUT10	8	33228342	33330940	-1	protein_coding	84750	FUT10	3.07918840008664e-07	-0.077987793	1	15.93	0	NA	NA	NA	NA	No	NA	0.02	rs80140480	41
ENSG00000253585	KB-1184D12.1	8	95109992	95116550	-1	lincRNA	NA	NA	NA	NA	1	13.04	0	NA	NA	NA	NA	No	NA	1.4e-06	rs76688800	42
ENSG00000256315	AP000462.1	11	115267474	115268376	1	processed_transcript	105369507	LOC105369507	NA	NA	0	0	1	-9	0.009	CMC_SVA_cis	-	No	NA	1.9e-05	rs922205	54
ENSG00000111266	DUSP16	12	12628829	12715317	-1	protein_coding	80824	DUSP16	0.112697836437734	-0.455489112	0	0	2	2.74562e-05	0.0169801681296735	BIOS_eQTL_geneLevel	+	No	NA	8.6e-06	rs10492237	56
ENSG00000183150	GPR19	12	12813825	12849141	-1	protein_coding	2842	GPR19	0.348589813892755	-0.214830791	2	13.68	2	1.15971e-101	0	BIOS_eQTL_geneLevel:GTEx_v6_Lung:GTEx_v6_Spleen:GTEx_v6_Testis:GTEx_v6_Whole_Blood:GTEx_v7_Adipose_Subcutaneous:GTEx_v7_Colon_Transverse:GTEx_v7_Lung:GTEx_v7_Small_Intestine_Terminal_Ileum:GTEx_v7_Spleen:GTEx_v7_Testis:GTEx_v7_Thyroid:GTEx_v7_Whole_Blood	+	No	NA	8.6e-06	rs10492237	56
ENSG00000257004	RP11-180M15.3	12	12821916	12838009	1	lincRNA	NA	NA	NA	NA	1	13.3	2	4.79955e-19	0	BIOS_eQTL_geneLevel	+	No	NA	8.6e-06	rs10492237	56
ENSG00000178878	APOLD1	12	12878851	12982909	1	protein_coding	81575	APOLD1	0.000507905443363466	0.920315234	0	0	2	1.17543e-11	0	BIOS_eQTL_geneLevel	-	No	NA	8.6e-06	rs10492237	56
ENSG00000129028	THAP10	15	71173681	71185124	-1	protein_coding	56906	THAP10	0.00119434425578864	-0.537920966	0	0	0	NA	NA	NA	NA	Yes	IMR90:Mesenchymal_Stem_Cell:Mesendoderm	3.8e-06	rs78172571	64
ENSG00000187720	THSD4	15	71389291	72075722	1	protein_coding	79875	THSD4	0.00181827156769691	0.891673759	1	12.95	0	NA	NA	NA	NA	No	NA	3.8e-06	rs78172571	64
ENSG00000225362	CT62	15	71402583	71407833	-1	protein_coding	196993	CT62	0.0331981608348203	-0.068609819	1	12.95	0	NA	NA	NA	NA	Yes	IMR90:Mesenchymal_Stem_Cell:Mesendoderm:Spleen	3.8e-06	rs78172571	64
ENSG00000259964	RP11-673C5.2	15	71439989	71481381	-1	antisense	NA	NA	NA	NA	0	0	0	NA	NA	NA	NA	Yes	IMR90:Mesenchymal_Stem_Cell	3.8e-06	rs78172571	64
ENSG00000066933	MYO9A	15	72114632	72410918	-1	protein_coding	4649	MYO9A	0.999991725771394	0.764084974	0	0	0	NA	NA	NA	NA	Yes	Mesenchymal_Stem_Cell	3.8e-06	rs78172571	64
ENSG00000261632	RP11-390D11.1	15	72264547	72332606	1	antisense	NA	NA	NA	NA	0	0	0	NA	NA	NA	NA	Yes	hESC:IMR90:Mesenchymal_Stem_Cell	3.8e-06	rs78172571	64
ENSG00000260173	RP11-2I17.4	15	72432845	72447800	-1	antisense	NA	NA	NA	NA	0	0	0	NA	NA	NA	NA	Yes	hESC:IMR90:Mesenchymal_Stem_Cell	3.8e-06	rs78172571	64
ENSG00000175318	GRAMD2	15	72452148	72490126	-1	protein_coding	196996	GRAMD2	2.95954761695704e-08	-1.504516326	0	0	0	NA	NA	NA	NA	Yes	Mesenchymal_Stem_Cell	3.8e-06	rs78172571	64
ENSG00000166780	C16orf45	16	15528152	15718885	1	protein_coding	89927	C16orf45	0.214680178058486	-0.633435445	1	15.59	0	NA	NA	NA	NA	No	NA	3.8e-07	rs116132984	67
ENSG00000166783	KIAA0430	16	15688243	15737023	-1	protein_coding	9665	KIAA0430	0.999999565958546	-1.509457287	1	15.59	0	NA	NA	NA	NA	No	NA	3.8e-07	rs116132984	67
ENSG00000108352	RAPGEFL1	17	38333263	38351908	1	protein_coding	51195	RAPGEFL1	0.874145903651903	-0.201649462	0	0	0	NA	NA	NA	NA	Yes	IMR90	1.7e-05	rs139177071	72
ENSG00000094804	CDC6	17	38443885	38459171	1	protein_coding	990	CDC6	1.81284406664719e-06	-1.441011626	0	0	0	NA	NA	NA	NA	Yes	Mesendoderm	1.7e-05	rs139177071	72
ENSG00000131759	RARA	17	38465444	38513094	1	protein_coding	5914	RARA	0.934197317282478	-0.594814581	0	0	0	NA	NA	NA	NA	Yes	Mesendoderm	1.7e-05	rs139177071	72
ENSG00000131747	TOP2A	17	38544768	38574202	-1	protein_coding	7153	TOP2A	0.996224029437404	-0.398754673	0	0	0	NA	NA	NA	NA	Yes	IMR90:Mesenchymal_Stem_Cell	1.7e-05	rs139177071	72
ENSG00000141753	IGFBP4	17	38599702	38613983	1	protein_coding	3487	IGFBP4	0.236669010399168	-0.889155936	0	0	0	NA	NA	NA	NA	Yes	IMR90:Mesenchymal_Stem_Cell	1.7e-05	rs139177071	72
ENSG00000266088	RP5-1028K7.2	17	38673278	38683254	1	lincRNA	NA	NA	NA	NA	0	0	0	NA	NA	NA	NA	Yes	IMR90:Mesenchymal_Stem_Cell	1.7e-05	rs139177071	72
ENSG00000073584	SMARCE1	17	38781214	38804760	-1	protein_coding	6605	SMARCE1	0.998188065018721	-1.018771073	0	0	0	NA	NA	NA	NA	Yes	hESC:IMR90:Mesenchymal_Stem_Cell:Mesendoderm:Trophoblast-like_Cell	1.7e-05	rs139177071	72
ENSG00000264058	KRT222	17	38785049	38821393	-1	protein_coding	125113	KRT222	NA	-0.318308395	0	0	0	NA	NA	NA	NA	Yes	hESC:IMR90:Mesenchymal_Stem_Cell:Mesendoderm:Trophoblast-like_Cell	1.7e-05	rs139177071	72
ENSG00000213424	KRT222	17	38810917	38821433	-1	protein_coding	125113	KRT222	0.00212668208955224	-0.318308395	0	0	0	NA	NA	NA	NA	Yes	hESC:IMR90:Mesenchymal_Stem_Cell:Mesendoderm:Trophoblast-like_Cell	1.7e-05	rs139177071	72
ENSG00000167916	KRT24	17	38854243	38860002	-1	protein_coding	192666	KRT24	5.0932770269769e-13	-0.08455035	0	0	0	NA	NA	NA	NA	Yes	hESC:IMR90:Mesenchymal_Stem_Cell:Mesendoderm	1.7e-05	rs139177071	72
ENSG00000167920	TMEM99	17	38975358	38992522	1	protein_coding	147184	TMEM99	3.15417716559819e-05	-0.317014706	0	0	0	NA	NA	NA	NA	Yes	hESC:IMR90:Mesenchymal_Stem_Cell:Mesendoderm:Trophoblast-like_Cell	1.7e-05	rs139177071	72
ENSG00000171431	KRT20	17	39032193	39041479	-1	protein_coding	54474	KRT20	5.57987712160891e-06	0.263509736	0	0	0	NA	NA	NA	NA	Yes	hESC:IMR90:Left_Ventricle:Mesenchymal_Stem_Cell:Mesendoderm:Neural_Progenitor_Cell:Spleen:Trophoblast-like_Cell	1.7e-05	rs139177071	72
ENSG00000212899	KRTAP3-3	17	39149686	39150385	-1	protein_coding	85293	KRTAP3-3	0.00478766737481947	0.972653142	0	0	0	NA	NA	NA	NA	Yes	hESC:IMR90:Left_Ventricle:Liver:Mesenchymal_Stem_Cell:Mesendoderm:Trophoblast-like_Cell	1.7e-05	rs139177071	72
ENSG00000248807	KRTAP9-12P	17	39368958	39369489	1	pseudogene	100287715	KRTAP9-12P	NA	NA	0	0	0	NA	NA	NA	NA	Yes	Mesendoderm	1.7e-05	rs139177071	72
ENSG00000212659	KRTAP9-6	17	39421591	39422893	1	protein_coding	100507608	KRTAP9-6	0.194495477706129	NA	1	23.3	0	NA	NA	NA	NA	No	NA	1.7e-05	rs139177071	72
ENSG00000229351	KRTAP9-11P	17	39427563	39428087	1	pseudogene	85347	KRTAP9-11P	NA	NA	1	23.3	0	NA	NA	NA	NA	No	NA	1.7e-05	rs139177071	72
ENSG00000180386	KRTAP9-7	17	39431911	39432949	1	protein_coding	100505724	KRTAP9-7	0.00547082986165627	NA	1	23.3	0	NA	NA	NA	NA	No	NA	1.7e-05	rs139177071	72
ENSG00000237183	KRTAP9-10P	17	39436856	39437062	1	pseudogene	106480422	KRTAP9-10P	NA	NA	1	23.3	0	NA	NA	NA	NA	No	NA	1.7e-05	rs139177071	72
ENSG00000094796	KRT31	17	39549976	39553844	-1	protein_coding	3881	KRT31	0.928538285568948	0.770088167	1	14.57	0	NA	NA	NA	NA	No	NA	1.7e-05	rs139177071	72
ENSG00000234859	AC003958.2	17	39558668	39581301	1	antisense	100505782	LOC100505782	NA	NA	1	14.57	0	NA	NA	NA	NA	No	NA	1.7e-05	rs139177071	72
ENSG00000225438	KRT41P	17	39562764	39568027	-1	pseudogene	8686	KRT41P	NA	NA	1	14.57	0	NA	NA	NA	NA	No	NA	1.7e-05	rs139177071	72
ENSG00000171401	KRT13	17	39657233	39661957	-1	protein_coding	3860	KRT13	0.00166754074952747	0.313090956	0	0	0	NA	NA	NA	NA	Yes	IMR90:Mesenchymal_Stem_Cell	1.7e-05	rs139177071	72
ENSG00000171345	KRT19	17	39679869	39684560	-1	protein_coding	3880	KRT19	0.0039364547878244	-0.19155064	0	0	0	NA	NA	NA	NA	Yes	hESC:IMR90:Mesenchymal_Stem_Cell:Mesendoderm:Trophoblast-like_Cell	1.7e-05	rs139177071	72
ENSG00000094661	OR1I1	19	15197791	15199032	1	protein_coding	126370	OR1I1	0.00172068988698609	0.17528132	2	25	0	NA	NA	NA	NA	No	NA	6.1e-06	rs16980313	77
ENSG00000105137	SYDE1	19	15218214	15225799	1	protein_coding	85360	SYDE1	0.946542806698739	0.083955031	0	0	2	9.00789e-07	5.79744e-07	GTEx_v7_Testis	-	No	NA	6.1e-06	rs16980313	77
