# Supplementary material for: Genetic associations with carotid intima-media thickness link to atherosclerosis biology with sex-differences in sub-Saharan Africans
Source: Research Square preprint supplement (doi:10.21203/rs.3.rs-147838/v1), 2021-01-22
Supplement: Supplementary file 8 [file e56b4996f22c4f6338a866eb.xlsx]

## Sheet: SuppTab_1_rsresume
X	BP	CHR	SNP	ALLELE1	ALLELE0	A1FREQ_All	BETA_All	SE_All	P_BOLT_LMM_All	A1FREQ_Females	BETA_Females	SE_Females	P_BOLT_LMM_Females	A1FREQ_Males	BETA_Males	SE_Males	P_BOLT_LMM_Males	A1FREQ_SexDiff	BETA_SexDiff	SE_SexDiff	P_BOLT_LMM_SexDiff	MAPPED_TRAIT	Ref	Genes
1	2183330	9	rs1324201	T	C	0.286116	-0.0103937	0.00210401	8.6e-07	0.281226	-0.00709633	0.00291598	0.015	0.291046	-0.0138524	0.00305047	1e-05	0.281226	-0.00709633	0.00291598	0.104932	attention deficit hyperactivity disorder, unipolar depression, schizophrenia, autism spectrum disorder, bipolar disorder; response to cyclophosphamide, chemotherapy-induced alopecia, response to 5' fluorouracil, response to doxorubicin	Smoller JW, Lancet, 2013; Chung S, Breast Cancer Res, 2013	SMARCA2; RNU2-25P
2	2183434	9	rs1324200	A	G	0.323917	-0.00841752	0.00198972	3.1e-05	0.321726	-0.00592474	0.00272934	0.033	0.326126	-0.0111485	0.00291413	0.00018	0.321726	-0.00592474	0.00272934	0.185167	attention deficit hyperactivity disorder, unipolar depression, schizophrenia, autism spectrum disorder, bipolar disorder; response to cyclophosphamide, chemotherapy-induced alopecia, response to 5' fluorouracil, response to doxorubicin	Smoller JW, Lancet, 2013; Chung S, Breast Cancer Res, 2013	SMARCA2; RNU2-25P
3	2183438	9	rs1324199	C	G	0.323423	-0.00837276	0.00199197	3.5e-05	0.321146	-0.00575502	0.00273283	0.039	0.325719	-0.0112371	0.002917	0.00016	0.321146	-0.00575502	0.00273283	0.164839	attention deficit hyperactivity disorder, unipolar depression, schizophrenia, autism spectrum disorder, bipolar disorder; response to cyclophosphamide, chemotherapy-induced alopecia, response to 5' fluorouracil, response to doxorubicin	Smoller JW, Lancet, 2013; Chung S, Breast Cancer Res, 2013	SMARCA2; RNU2-25P
4	3734189	9	rs560733715	G	A	0.987313	-0.0270485	0.00868036	0.0017	0.988279	-0.00853951	0.0123364	0.51	0.986339	-0.0477006	0.0122914	9.7e-05					erythrocyte count	Kichaev G, Am J Hum Genet, 2018	-
5	4196461	9	rs10758568	A	T	0.139647	0.006882	0.00269721	0.011	0.141799	-0.000758408	0.00370342	0.83	0.137478	0.0152029	0.00394653	9e-05	0.141799	-0.000758408	0.00370342	0.00281907	primary angle closure glaucoma; intraocular pressure measurement; central corneal thickness	Khor CC, Nat Genet, 2016; Gao XR, Hum Mol Genet, 2018; MacGregor S, Nat Genet, 2018; Khawaja AP, Nat Genet, 2018; Iglesias AI, Nat Commun, 2018	GLIS3
6	4202070	9	rs7872088	G	A	0.858567	-0.00549435	0.00268453	0.042	0.857242	0.00345046	0.00369655	0.34	0.859902	-0.0151277	0.00391644	9.2e-05					thyroxine measurement; primary angle closure glaucoma; intraocular pressure measurement; central corneal thickness	Teumer A, Nat Commun, 2018; Khor CC, Nat Genet, 2016; Gao XR, Hum Mol Genet, 2018; MacGregor S, Nat Genet, 2018; Khawaja AP, Nat Genet, 2018; Iglesias AI, Nat Commun, 2018	GLIS3
7	4202173	9	rs7873150	C	T	0.859086	-0.00576504	0.00269081	0.033	0.857753	0.00327327	0.00370561	0.37	0.86043	-0.0154711	0.00392515	6.6e-05					thyroxine measurement; primary angle closure glaucoma; intraocular pressure measurement; central corneal thickness	Teumer A, Nat Commun, 2018; Khor CC, Nat Genet, 2016; Gao XR, Hum Mol Genet, 2018; MacGregor S, Nat Genet, 2018; Khawaja AP, Nat Genet, 2018; Iglesias AI, Nat Commun, 2018	GLIS3
8	4202650	9	rs12685690	C	T	0.85838	-0.00557155	0.0026835	0.039	0.856996	0.00319847	0.00369484	0.37	0.859775	-0.015053	0.00391527	9.9e-05	0.856996	0.00319847	0.00369484	0.000595733	thyroxine measurement; primary angle closure glaucoma; intraocular pressure measurement; central corneal thickness	Teumer A, Nat Commun, 2018; Khor CC, Nat Genet, 2016; Gao XR, Hum Mol Genet, 2018; MacGregor S, Nat Genet, 2018; Khawaja AP, Nat Genet, 2018; Iglesias AI, Nat Commun, 2018	GLIS3
9	4784143	9	rs4008453	A	G	0.964644	-0.0162899	0.00550193	0.0032	0.963531	-0.000279863	0.00744662	0.96	0.965766	-0.0324906	0.00817301	9.5e-05					leukocyte count; platelet count; functional laterality; granulocyte percentage of myeloid white cells; lymphocyte percentage of leukocytes; myeloid white cell count; neutrophil percentage of leukocytes; neutrophil count; platelet crit; granulocyte count; neutrophil count, eosinophil count; neutrophil count, basophil count; eosinophil count	Kichaev G, Am J Hum Genet, 2018; Kamatani Y, Nat Genet, 2010; Schick UM, Am J Hum Genet, 2016; Shameer K, Hum Genet, 2013; Armour JA, Heredity (Edinb), 2013; Soranzo N, Nat Genet, 2009; Kanai M, Nat Genet, 2018; Astle WJ, Cell, 2016	RP11-307I14.4; RP11-307I14.2; RCL1; RP11-307I14.3
10	4788616	9	rs35797651	C	G	0.963814	-0.0168702	0.005422	0.0019	0.96314	-0.00132242	0.00735311	0.86	0.964494	-0.0329797	0.0080365	5.3e-05					platelet count; functional laterality; eosinophil count	Shameer K, Hum Genet, 2013; Armour JA, Heredity (Edinb), 2013; Kanai M, Nat Genet, 2018; Astle WJ, Cell, 2016	RP11-307I14.4; RP11-307I14.2; RCL1; RP11-307I14.3
11	4878911	9	rs1571223	A	G	0.689131	-0.00510256	0.00202386	0.012	0.686853	0.00297671	0.00279324	0.3	0.691427	-0.0124151	0.00294584	3.2e-05	0.686853	0.00297671	0.00279324	0.000123111	erythrocyte count; mean corpuscular volume; mean corpuscular hemoglobin; reticulocyte count; platelet count; platelet crit; dementia, Alzheimer's disease neuropathologic change; red blood cell distribution width	van Rooij FJA, Am J Hum Genet, 2016; Astle WJ, Cell, 2016; Ganesh SK, Nat Genet, 2009; Kanai M, Nat Genet, 2018; Beecham GW, PLoS Genet, 2014; Pilling LC, PLoS One, 2017	RCL1; AL158147.2
12	4879855	9	rs7853456	T	A	0.691573	-0.00509162	0.00203647	0.013	0.688986	0.00295536	0.00281079	0.3	0.694181	-0.0124802	0.00296407	3.2e-05					erythrocyte count; mean corpuscular volume; mean corpuscular hemoglobin; reticulocyte count; platelet count; platelet crit; dementia, Alzheimer's disease neuropathologic change; red blood cell distribution width	van Rooij FJA, Am J Hum Genet, 2016; Astle WJ, Cell, 2016; Ganesh SK, Nat Genet, 2009; Kanai M, Nat Genet, 2018; Beecham GW, PLoS Genet, 2014; Pilling LC, PLoS One, 2017	RCL1; AL158147.2
13	7684905	9	rs10976500	G	A	0.299243	0.00829937	0.00207935	6.1e-05	0.306699	0.00885513	0.00284288	0.0016	0.291726	0.00817863	0.00305739	0.013	0.306699	0.00885513	0.00284288	0.869648	HIV-1 infection	Petrovski S, AIDS, 2010	-
14	8169595	9	rs111330624	C	T	0.944619	-0.00730194	0.00411127	0.07	0.945414	0.00806617	0.00571167	0.16	0.943818	-0.0230752	0.00594528	7.2e-05	0.945414	0.00806617	0.00571167	0.000130503	chronotype measurement	Kichaev G, Am J Hum Genet, 2018	-
15	8189112	9	rs10511488	G	A	0.452033	0.00427485	0.00185867	0.021	0.449659	-0.00287288	0.00256574	0.26	0.454426	0.0112854	0.00270486	1.6e-05	0.449659	-0.00287288	0.00256574	0.000120018	platelet aggregation; androstenedione measurement, estrogen-receptor positive breast cancer, estrone measurement	Johnson AD, Nat Genet, 2010; Dudenkov TM, Breast Cancer Res Treat, 2017	-
16	8231633	9	rs10976866	G	A	0.95107	-0.00218613	0.00430167	0.59	0.952605	0.0164935	0.00600545	0.0057	0.949523	-0.0201599	0.00619186	0.00081	0.952605	0.0164935	0.00600545	1.68099e-05	androstenedione measurement, estrogen-receptor positive breast cancer, estrone measurement; attention deficit hyperactivity disorder, conduct disorder	Dudenkov TM, Breast Cancer Res Treat, 2017; Anney RJ, Am J Med Genet B Neuropsychiatr Genet, 2008	-
17	8233626	9	rs138317253	C	G	0.950443	-0.00172988	0.00428325	0.67	0.951722	0.0159254	0.00597022	0.0073	0.949154	-0.018737	0.00617456	0.0017	0.951722	0.0159254	0.00597022	4.36498e-05	androstenedione measurement, estrogen-receptor positive breast cancer, estrone measurement; attention deficit hyperactivity disorder, conduct disorder	Dudenkov TM, Breast Cancer Res Treat, 2017; Anney RJ, Am J Med Genet B Neuropsychiatr Genet, 2008	-
18	8621568	9	rs10511505	C	G	0.980029	0.0270265	0.0067082	6.4e-05	0.980059	0.0114615	0.00924052	0.21	0.979999	0.0402373	0.00978257	2.4e-05	0.980059	0.0114615	0.00924052	0.0303377	-	-	PTPRD
19	10050067	9	rs149550372	C	T	0.986981	-0.00338547	0.00825503	0.69	0.988159	-0.0388605	0.0117631	0.0012	0.985792	0.0249687	0.0116623	0.031	0.988159	-0.0388605	0.0117631	9.51578e-05	gait measurement; smoking behavior, 3-hydroxypropylmercapturic acid measurement; smoking behavior, 3-hydroxy-1-methylpropylmercapturic acid measurement; temperament and character inventory; QRS duration, Trypanosoma cruzi seropositivity; age at menarche	Adams HH, J Gerontol A Biol Sci Med Sci, 2015; Park SL, PLoS One, 2015; Service SK, Transl Psychiatry, 2012; Deng X, PLoS One, 2013; Horikoshi M, Nat Commun, 2018	PTPRD
20	10676462	9	rs111305749	T	C	0.925022	0.0132412	0.00366479	0.00032	0.925845	0.0203537	0.00512406	8.6e-05	0.924192	0.00642663	0.00526715	0.22	0.925845	0.0203537	0.00512406	0.0549266	-	-	-
21	12230735	9	rs73410735	C	G	0.780336	0.0054792	0.00224749	0.016	0.772067	0.0119768	0.00304943	9.4e-05	0.788673	-0.00149115	0.00333215	0.69					-	-	-
22	12246923	9	rs12551833	A	G	0.850184	0.00467038	0.00262058	0.082	0.844278	0.0140289	0.00356568	9e-05	0.856137	-0.00486191	0.00387266	0.2	0.844278	0.0140289	0.00356568	0.000278798	-	-	-
23	12250387	9	9:12250387	G	A	0.798455	0.00496304	0.00232319	0.035	0.791446	0.0141313	0.00315322	7.8e-06	0.80552	-0.0044422	0.00344248	0.2	0.791446	0.0141313	0.00315322	5.59598e-05	-	-	-
24	12250978	9	rs72501416	G	A	0.798486	0.00499806	0.0023234	0.034	0.79149	0.0142011	0.00315356	7e-06	0.805539	-0.00444929	0.0034427	0.2					-	-	-
25	12251731	9	rs7874437	G	A	0.782674	0.00534996	0.00226179	0.02	0.779542	0.012925	0.00308193	2.8e-05	0.785831	-0.00226924	0.00333588	0.43					erosive tooth wear measurement	Alaraudanjoki VK, Caries Res, 2018	-
26	12253933	9	rs756156	T	C	0.818913	0.00536239	0.0024229	0.031	0.817184	0.0131119	0.00331039	7.7e-05	0.820656	-0.00238502	0.00356311	0.4					erosive tooth wear measurement	Alaraudanjoki VK, Caries Res, 2018	-
27	12258342	9	9:12258342	A	G	0.831451	0.00600196	0.00249692	0.018	0.826369	0.0148518	0.00339483	1.3e-05	0.836575	-0.00308843	0.00369222	0.39	0.826369	0.0148518	0.00339483	0.000291954	erosive tooth wear measurement	Alaraudanjoki VK, Caries Res, 2018	-
28	12258429	9	rs12551691	G	A	0.797124	0.0062258	0.00231775	0.008	0.789301	0.0145765	0.00314045	3.8e-06	0.805011	-0.00237125	0.00344124	0.49	0.789301	0.0145765	0.00314045	0.000229552	erosive tooth wear measurement	Alaraudanjoki VK, Caries Res, 2018	-
29	12258683	9	rs73410797	C	T	0.789365	0.00616175	0.00228783	0.0076	0.781573	0.0144533	0.00309977	3.3e-06	0.797221	-0.00228724	0.00339689	0.5					erosive tooth wear measurement	Alaraudanjoki VK, Caries Res, 2018	-
30	12260096	9	rs112282166	A	G	0.852306	0.00584006	0.00263398	0.029	0.846612	0.015014	0.00357789	3e-05	0.858045	-0.00338506	0.00389931	0.37	0.846612	0.015014	0.00357789	0.000429962	erosive tooth wear measurement	Alaraudanjoki VK, Caries Res, 2018	-
31	12260408	9	rs10960551	C	G	0.72639	0.00710961	0.00209961	0.00069	0.716212	0.015121	0.00286094	1.2e-07	0.736651	-0.000720076	0.00309966	0.89	0.716212	0.015121	0.00286094	0.000142801	erosive tooth wear measurement	Alaraudanjoki VK, Caries Res, 2018	-
32	12261388	9	rs4740521	G	A	0.718774	0.00677723	0.00208021	0.0011	0.710194	0.014542	0.00283738	2.7e-07	0.727423	-0.000867877	0.00306674	0.81					erosive tooth wear measurement	Alaraudanjoki VK, Caries Res, 2018	-
33	12261951	9	rs10960553	T	C	0.69885	0.00630881	0.00204319	0.0021	0.691048	0.0135639	0.00278645	1e-06	0.706716	-0.00098506	0.00301221	0.74	0.691048	0.0135639	0.00278645	0.000329715	erosive tooth wear measurement	Alaraudanjoki VK, Caries Res, 2018	-
34	12262289	9	rs1984212	G	T	0.699405	0.00624725	0.00204307	0.0023	0.691528	0.0135328	0.00278653	1.1e-06	0.707345	-0.00104357	0.00301178	0.73	0.691528	0.0135328	0.00278653	0.000320976	erosive tooth wear measurement	Alaraudanjoki VK, Caries Res, 2018	RP11-71E22.1
35	12262340	9	rs1984213	C	G	0.700044	0.00621356	0.00204713	0.0025	0.691932	0.0135866	0.00279375	1.1e-06	0.708223	-0.00118459	0.00301598	0.7	0.691932	0.0135866	0.00279375	0.000273952	erosive tooth wear measurement	Alaraudanjoki VK, Caries Res, 2018	RP11-71E22.1
36	12262674	9	rs10756352	G	A	0.595604	0.00478241	0.00190048	0.012	0.589768	0.0103132	0.00260836	8e-05	0.601488	-0.000701637	0.00278257	0.83	0.589768	0.0103132	0.00260836	0.0034462	erosive tooth wear measurement	Alaraudanjoki VK, Caries Res, 2018	RP11-71E22.1
37	12263033	9	rs10115549	G	A	0.704193	0.00628854	0.0020513	0.0023	0.696587	0.0134042	0.00279134	1.4e-06	0.711861	-0.000863358	0.00303113	0.77	0.696587	0.0134042	0.00279134	0.00045391	erosive tooth wear measurement	Alaraudanjoki VK, Caries Res, 2018	RP11-71E22.1
38	12263593	9	rs10756353	G	A	0.698252	0.00621961	0.00204017	0.0024	0.69026	0.0133837	0.00277952	1.3e-06	0.706309	-0.00100774	0.00301102	0.74	0.69026	0.0133837	0.00277952	0.000375528	erosive tooth wear measurement	Alaraudanjoki VK, Caries Res, 2018	RP11-71E22.1
39	12263744	9	rs10217415	T	C	0.596402	0.00476533	0.00190079	0.013	0.590613	0.0103683	0.00260656	7.1e-05	0.602239	-0.000836507	0.00278542	0.79	0.590613	0.0103683	0.00260656	0.00293342	erosive tooth wear measurement	Alaraudanjoki VK, Caries Res, 2018	RP11-71E22.1
40	12264458	9	rs1416577	G	C	0.696453	0.00623226	0.00203798	0.0023	0.688746	0.01355	0.00277738	9.5e-07	0.704223	-0.00116051	0.0030067	0.71	0.688746	0.01355	0.00277738	0.000272981	erosive tooth wear measurement	Alaraudanjoki VK, Caries Res, 2018	RP11-71E22.1
41	12265747	9	rs872046	G	T	0.67354	0.00511427	0.00200158	0.011	0.664112	0.0116114	0.00274105	2.1e-05	0.683045	-0.00112902	0.00293885	0.69					erosive tooth wear measurement	Alaraudanjoki VK, Caries Res, 2018	RP11-71E22.1
42	12267939	9	rs73412907	T	C	0.831511	0.00608258	0.00251512	0.017	0.82758	0.0148021	0.00342039	1.6e-05	0.835474	-0.00275277	0.00371764	0.39					erosive tooth wear measurement	Alaraudanjoki VK, Caries Res, 2018	RP11-71E22.1
43	12268020	9	rs73412908	A	G	0.831087	0.00603526	0.00251653	0.018	0.826956	0.0146702	0.0034239	1.9e-05	0.835252	-0.00267252	0.00371797	0.4					erosive tooth wear measurement	Alaraudanjoki VK, Caries Res, 2018	RP11-71E22.1
44	12272623	9	rs7858843	G	A	0.788561	0.00453364	0.00230666	0.052	0.78187	0.0127341	0.00314795	5.5e-05	0.795307	-0.00336418	0.00339802	0.3					erosive tooth wear measurement	Alaraudanjoki VK, Caries Res, 2018	RP11-71E22.1
45	12276281	9	rs77128395	A	G	0.814859	-0.00677214	0.00241411	0.0053	0.817689	-0.0139762	0.00334561	2.4e-05	0.812007	0.000760609	0.00349973	0.76					erosive tooth wear measurement	Alaraudanjoki VK, Caries Res, 2018	RP11-71E22.1; RNU2-47P
46	16425640	9	rs7846746	T	C	0.856565	-0.00555942	0.00267446	0.036	0.859469	0.00376631	0.00371814	0.34	0.853638	-0.0152196	0.00386536	9.8e-05					treatment-resistant hypertension; gestational age, parental genotype effect measurement; response to diisocyanate, asthma; heel bone mineral density	El Rouby N, Pharmacogenomics J, 2018; Zhang G, N Engl J Med, 2017; Yucesoy B, Toxicol Sci, 2015; Kim SK, PLoS One, 2018	BNC2
47	16619529	9	rs13290470	A	G	0.954649	-0.00824098	0.0044592	0.058	0.954454	0.0106561	0.00613903	0.099	0.954846	-0.0264641	0.0065066	9.2e-05	0.954454	0.0106561	0.00613903	2.64015e-05	body mass index; Heschl's gyrus morphology measurement; FEV/FEC ratio; lobe attachment	Kichaev G, Am J Hum Genet, 2018; Cai DC, Genes Brain Behav, 2014; Shaffer JR, Am J Hum Genet, 2017	BNC2; RP11-62F24.1
48	17366694	9	rs77333912	T	C	0.987009	-0.0288394	0.00824076	0.00049	0.986916	-0.0133818	0.0112871	0.22	0.987103	-0.0475824	0.0120875	9.8e-05					waist-hip ratio; QRS duration, response to sulfonylurea; lung adenocarcinoma	Kichaev G, Am J Hum Genet, 2018; Floyd JS, Pharmacogenomics J, 2016; McKay JD, Nat Genet, 2017	CNTLN
49	17368240	9	rs141404282	C	G	0.987009	-0.0288394	0.00824076	0.00049	0.986916	-0.0133818	0.0112871	0.22	0.987103	-0.0475824	0.0120875	9.8e-05	0.986916	-0.0133818	0.0112871	0.0362285	waist-hip ratio; QRS duration, response to sulfonylurea; lung adenocarcinoma	Kichaev G, Am J Hum Genet, 2018; Floyd JS, Pharmacogenomics J, 2016; McKay JD, Nat Genet, 2017	CNTLN
50	17372305	9	rs147222532	T	G	0.987503	-0.0280488	0.00838566	0.00086	0.987774	-0.0098946	0.0116278	0.38	0.98723	-0.049141	0.0121489	6.2e-05	0.987774	-0.0098946	0.0116278	0.0181003	waist-hip ratio; lung adenocarcinoma	Kichaev G, Am J Hum Genet, 2018; McKay JD, Nat Genet, 2017	CNTLN
51	17377400	9	rs116152235	G	A	0.987174	-0.0286692	0.00835107	0.00064	0.987308	-0.0114921	0.0115152	0.3	0.987039	-0.0489074	0.012166	7e-05	0.987308	-0.0114921	0.0115152	0.0236947	waist-hip ratio	Kichaev G, Am J Hum Genet, 2018	CNTLN
52	18303691	9	rs12002789	A	C	0.896694	-0.012372	0.003085	5.6e-05	0.898562	-0.0139112	0.00431422	0.0014	0.89481	-0.011133	0.0044333	0.011	0.898562	-0.0139112	0.00431422	0.64922	cerebral cortex growth measurement; attempted suicide	Szekely E, Genet Epidemiol, 2018; Erlangsen A, Mol Psychiatry, 2018	-
53	18571659	9	rs75840412	C	G	0.974262	-0.0178687	0.00596314	0.0025	0.972918	-0.00371441	0.00795528	0.59	0.975617	-0.0361606	0.00900241	6.6e-05					-	-	ADAMTSL1; MIR3152
54	18919828	9	rs112145696	A	G	0.983354	-0.0169266	0.00761479	0.025	0.983472	-0.0452327	0.0105029	1.5e-05	0.983236	0.0104137	0.0110903	0.41	0.983472	-0.0452327	0.0105029	0.000224609	non-small cell lung carcinoma; perceived unattractiveness to mosquitos measurement; diet measurement; heel bone mineral density	Lee Y, Carcinogenesis, 2012; Jones AV, Hum Mol Genet, 2017; Guenard F, Nutrients, 2017; Kim SK, PLoS One, 2018	ADAMTSL1; FAM154A
55	18920389	9	rs112375613	G	A	0.985207	-0.0169536	0.00788907	0.032	0.984841	-0.0425422	0.0107697	7.5e-05	0.985576	0.00885262	0.0116117	0.49	0.984841	-0.0425422	0.0107697	0.00101431	non-small cell lung carcinoma; perceived unattractiveness to mosquitos measurement; diet measurement; heel bone mineral density	Lee Y, Carcinogenesis, 2012; Jones AV, Hum Mol Genet, 2017; Guenard F, Nutrients, 2017; Kim SK, PLoS One, 2018	ADAMTSL1; FAM154A
56	21950446	9	rs2157716	C	T	0.923774	-0.0147956	0.0036152	4.1e-05	0.92459	-0.0124532	0.00502942	0.014	0.922952	-0.018783	0.0052209	0.00031	0.92459	-0.0124532	0.00502942	0.376533	breast carcinoma; lung carcinoma, estrogen-receptor negative breast cancer, colorectal cancer, ovarian endometrioid carcinoma, prostate carcinoma, ovarian serous carcinoma, breast carcinoma, ovarian carcinoma, lung adenocarcinoma, squamous cell lung carcinoma; nasopharyngeal neoplasm; inflammatory bowel disease; coronary artery disease; coronary artery calcification, type II diabetes mellitus; B-…	Michailidou K, Nature, 2017; Fehringer G, Cancer Res, 2016; Bei JX, Cancer Epidemiol Biomarkers Prev, 2016; Yang SK, Gastroenterology, 2016; van der Harst P, Circ Res, 2017; Divers J, BMC Genet, 2017; Vijayakrishnan J, Nat Commun, 2018	MTAP; RP11-145E5.5; RP11-149I2.5; C9orf53; CDKN2A
57	21964463	9	rs67226702	T	A	0.926644	-0.0143425	0.00361451	7.1e-05	0.927145	-0.011819	0.00502377	0.019	0.926138	-0.018087	0.00522457	0.00049					red blood cell distribution width; eosinophil count; breast carcinoma; lung carcinoma, estrogen-receptor negative breast cancer, colorectal cancer, ovarian endometrioid carcinoma, prostate carcinoma, ovarian serous carcinoma, breast carcinoma, ovarian carcinoma, lung adenocarcinoma, squamous cell lung carcinoma; nasopharyngeal neoplasm; B-cell acute lymphoblastic leukemia; inflammatory bowel dise…	Kichaev G, Am J Hum Genet, 2018; Michailidou K, Nature, 2017; Fehringer G, Cancer Res, 2016; Bei JX, Cancer Epidemiol Biomarkers Prev, 2016; Migliorini G, Blood, 2013; Yang SK, Gastroenterology, 2016; Astle WJ, Cell, 2016; Gieger C, Nature, 2011; van der Harst P, Circ Res, 2017; Divers J, BMC Genet, 2017; Vijayakrishnan J, Nat Commun, 2018	RP11-145E5.5; C9orf53; CDKN2A
58	21966221	9	rs3731257	G	A	0.924177	-0.0141712	0.00354793	6.1e-05	0.924874	-0.0117505	0.0049209	0.017	0.923474	-0.0180891	0.00513887	0.00041					red blood cell distribution width; leukocyte count; eosinophil count; breast carcinoma; lung carcinoma, estrogen-receptor negative breast cancer, colorectal cancer, ovarian endometrioid carcinoma, prostate carcinoma, ovarian serous carcinoma, breast carcinoma, ovarian carcinoma, lung adenocarcinoma, squamous cell lung carcinoma; nasopharyngeal neoplasm; B-cell acute lymphoblastic leukemia; inflam…	Kichaev G, Am J Hum Genet, 2018; Michailidou K, Nature, 2017; Fehringer G, Cancer Res, 2016; Bei JX, Cancer Epidemiol Biomarkers Prev, 2016; Migliorini G, Blood, 2013; Yang SK, Gastroenterology, 2016; Astle WJ, Cell, 2016; Gieger C, Nature, 2011; van der Harst P, Circ Res, 2017; Divers J, BMC Genet, 2017; Vijayakrishnan J, Nat Commun, 2018	RP11-145E5.5; C9orf53; CDKN2A
59	22859828	9	rs10965479	C	T	0.562719	-0.00757029	0.00188588	5.4e-05	0.565178	-0.00920494	0.00258105	0.00037	0.560239	-0.00664412	0.00276851	0.017	0.565178	-0.00920494	0.00258105	0.493226	response to drug	Hart AB, PLoS One, 2012	-
60	22882305	9	rs4246847	T	C	0.810622	-0.0097824	0.00239965	4.2e-05	0.804693	-0.00920806	0.0032367	0.0043	0.816599	-0.0115009	0.00357941	0.002					-	-	-
61	24559653	9	rs2805061	C	A	0.916405	0.00948797	0.00348066	0.0059	0.914818	-0.00153568	0.00469981	0.75	0.918004	0.0215342	0.00518365	2.8e-05					chronotype measurement; smoking behavior, 3-hydroxypropylmercapturic acid measurement	Jones SE, Nat Commun, 2019; Park SL, PLoS One, 2015	IZUMO3; RP11-20A20.2
62	25435116	9	rs10966905	A	G	0.95597	-0.000923919	0.00456415	0.86	0.952448	-0.0174645	0.00603379	0.0043	0.95952	0.0181834	0.00696775	0.0074	0.952448	-0.0174645	0.00603379	8.98642e-05	response to bronchodilator, FEV/FEC ratio; RR interval; dihydroxy docosatrienoic acid measurement	Lutz SM, BMC Genet, 2015; Marroni F, Circ Cardiovasc Genet, 2009; Yu B, Genet Epidemiol, 2013	-
63	25450879	9	rs10966917	C	T	0.956157	-0.00155544	0.00456354	0.75	0.952561	-0.0183605	0.00603412	0.0026	0.959781	0.0177331	0.00696546	0.009	0.952561	-0.0183605	0.00603412	7.30684e-05	response to bronchodilator, FEV/FEC ratio; RR interval	Lutz SM, BMC Genet, 2015; Marroni F, Circ Cardiovasc Genet, 2009	-
64	25962879	9	rs145382521	C	T	0.961179	0.00101303	0.00501382	0.84	0.963222	-0.0199385	0.00709906	0.0056	0.95912	0.0199327	0.00712394	0.0063	0.963222	-0.0199385	0.00709906	5.94231e-05	-	-	RP11-477G9.1
65	25964108	9	rs112949855	G	A	0.923588	0.00212312	0.00355979	0.52	0.923177	-0.0110486	0.00489166	0.027	0.924002	0.0168718	0.00520408	0.0015	0.923177	-0.0110486	0.00489166	7.52432e-05	-	-	-
66	25965069	9	rs138709203	C	T	0.961699	0.000858932	0.00499859	0.85	0.963342	-0.0193521	0.00706089	0.007	0.960042	0.0193491	0.0071169	0.008	0.963342	-0.0193521	0.00706089	9.24219e-05	-	-	-
67	25969995	9	rs74751031	C	G	0.89036	0.0050377	0.00302731	0.089	0.889099	-0.00676606	0.0041417	0.12	0.891631	0.0188507	0.0044458	4.6e-05					-	-	-
68	25978994	9	rs140904511	G	C	0.958665	0.00175715	0.00481438	0.7	0.959765	-0.0177495	0.0067371	0.01	0.957555	0.0203927	0.00691411	0.0041	0.959765	-0.0177495	0.0067371	6.29391e-05	-	-	-
69	26017290	9	rs111874215	T	C	0.891687	0.0032096	0.00302964	0.25	0.889661	-0.00776756	0.00411762	0.07	0.893729	0.0162463	0.00448038	0.00034	0.889661	-0.00776756	0.00411762	6.42695e-05	-	-	-
70	26228760	9	rs10967249	G	C	0.742168	0.00936696	0.00214028	1.3e-05	0.751331	0.00984376	0.0029966	0.00093	0.732931	0.00905686	0.00307468	0.0038	0.751331	0.00984376	0.0029966	0.852741	smoking status measurement; visceral:subcutaneous adipose tissue ratio; serum alanine aminotransferase measurement, response to combination chemotherapy, acute lymphoblastic leukemia	Liu M, Nat Genet, 2019; Fox CS, PLoS Genet, 2012; Liu Y, Clin Pharmacol Ther, 2017	-
71	26232062	9	rs12378640	C	A	0.863054	0.0107127	0.00273805	9.7e-05	0.863437	0.0129347	0.00378553	0.00056	0.862669	0.0088105	0.00397827	0.022	0.863437	0.0129347	0.00378553	0.4469	smoking status measurement; visceral:subcutaneous adipose tissue ratio; serum alanine aminotransferase measurement, response to combination chemotherapy, acute lymphoblastic leukemia	Liu M, Nat Genet, 2019; Fox CS, PLoS Genet, 2012; Liu Y, Clin Pharmacol Ther, 2017	-
72	26235839	9	rs934523	C	G	0.88293	0.0120244	0.00293922	4e-05	0.883081	0.0148204	0.00405668	0.00023	0.882778	0.0094997	0.00427786	0.02					smoking status measurement; serum alanine aminotransferase measurement, response to combination chemotherapy, acute lymphoblastic leukemia	Liu M, Nat Genet, 2019; Liu Y, Clin Pharmacol Ther, 2017	-
73	26258290	9	rs12555624	T	A	0.85489	0.0110999	0.00268049	3.5e-05	0.85422	0.0133135	0.00370739	0.00029	0.855565	0.00924514	0.00389316	0.016	0.85422	0.0133135	0.00370739	0.443427	-	-	-
74	27811858	9	rs10968124	T	C	0.74098	-0.00771157	0.00211433	0.00026	0.744979	-0.0012148	0.00292341	0.63	0.73695	-0.0132447	0.00307231	2.6e-05	0.744979	-0.0012148	0.00292341	0.00406831	-	-	RP11-575I8.1
75	27813695	9	rs7043880	A	G	0.536882	-0.00580529	0.00185652	0.0016	0.543559	-0.000586238	0.00254509	0.76	0.530151	-0.0112414	0.0027216	4.3e-05					-	-	RP11-575I8.1
76	27818130	9	rs7861951	G	C	0.602505	-0.00627015	0.00189849	0.00096	0.611336	-0.00124895	0.00261235	0.58	0.593602	-0.0112224	0.0027734	5.9e-05					smoking status measurement	Liu M, Nat Genet, 2019	RP11-575I8.1
77	28519432	9	rs60201106	G	A	0.98642	-0.0335989	0.00839889	7.4e-05	0.985813	-0.0313163	0.0112281	0.0052	0.987033	-0.033041	0.0126482	0.011					brain aneurysm	Hong EP, J Clin Med, 2019	LINGO2
78	29007440	9	rs115965069	A	T	0.980913	-0.0267587	0.00681701	8.9e-05	0.981012	-0.0312726	0.00945365	0.001	0.980813	-0.0240405	0.00987517	0.017	0.981012	-0.0312726	0.00945365	0.592118	-	-	-
79	29008730	9	rs139565969	G	T	0.98122	-0.0273574	0.00688615	7.3e-05	0.981308	-0.0317667	0.00953338	0.00092	0.981131	-0.0245686	0.00999194	0.016	0.981308	-0.0317667	0.00953338	0.597594	-	-	-
80	29008751	9	rs561031762	C	T	0.98122	-0.0273574	0.00688615	7.3e-05	0.981308	-0.0317667	0.00953338	0.00092	0.981131	-0.0245686	0.00999194	0.016					-	-	-
81	29008757	9	rs546897055	A	C	0.98122	-0.0273574	0.00688615	7.3e-05	0.981308	-0.0317667	0.00953338	0.00092	0.981131	-0.0245686	0.00999194	0.016					-	-	-
82	29008982	9	rs144903960	C	T	0.980108	-0.0275125	0.00669829	3.8e-05	0.980217	-0.0298926	0.00928392	0.0013	0.979999	-0.0266662	0.00970841	0.0072	0.980217	-0.0298926	0.00928392	0.807811	-	-	-
83	29020680	9	rs16914227	G	A	0.980849	-0.0266551	0.00679842	8.9e-05	0.980823	-0.0307804	0.00941523	0.0012	0.980876	-0.0245332	0.00986124	0.015	0.980823	-0.0307804	0.00941523	0.642613	-	-	-
84	29101178	9	rs79263707	A	G	0.980298	-0.0260404	0.00666429	9.4e-05	0.9804	-0.0293733	0.0091992	0.0015	0.980196	-0.0244798	0.00969822	0.013					granulocyte colony-stimulating factor measurement	Ahola-Olli AV, Am J Hum Genet, 2016	-
85	29102253	9	rs190626706	G	C	0.980298	-0.0260404	0.00666429	9.4e-05	0.9804	-0.0293733	0.0091992	0.0015	0.980196	-0.0244798	0.00969822	0.013	0.9804	-0.0293733	0.0091992	0.710821	granulocyte colony-stimulating factor measurement	Ahola-Olli AV, Am J Hum Genet, 2016	-
86	29105965	9	rs78913418	T	C	0.980301	-0.02612	0.00665944	8.8e-05	0.980444	-0.0296904	0.00920202	0.0014	0.980158	-0.0243547	0.00968121	0.014					granulocyte colony-stimulating factor measurement	Ahola-Olli AV, Am J Hum Genet, 2016	-
87	29208537	9	rs368451144	C	T	0.988583	-0.0355133	0.00881901	3.9e-05	0.988361	-0.040977	0.0118739	0.00045	0.988807	-0.033482	0.0131746	0.013					-	-	-
88	29225267	9	rs144341347	G	A	0.972226	-0.023498	0.00566922	2.5e-05	0.973978	-0.0304776	0.00806291	0.00012	0.970459	-0.019711	0.00802291	0.019	0.973978	-0.0304776	0.00806291	0.337733	-	-	-
89	29229514	9	rs115797473	C	T	0.966117	-0.0229743	0.00534269	1.3e-05	0.967455	-0.0295234	0.00748751	6.6e-05	0.964767	-0.0195215	0.00766249	0.015	0.967455	-0.0295234	0.00748751	0.344397	-	-	RP11-373A6.1
90	29335388	9	rs368245336	G	A	0.987066	-0.0372706	0.00845631	8.9e-06	0.986544	-0.0412525	0.0113842	0.00026	0.987592	-0.0382931	0.0126349	0.0033					-	-	-
91	29364485	9	rs12344220	G	A	0.965306	-0.0182051	0.00509804	0.00027	0.96555	-0.0333964	0.00709163	1.6e-06	0.96506	-0.00454468	0.00736296	0.59	0.96555	-0.0333964	0.00709163	0.00425868	cannabis dependence measurement; migraine disorder; motion sickness	Sherva R, JAMA Psychiatry, 2016; Pickrell JK, Nat Genet, 2016; Hromatka BS, Hum Mol Genet, 2015	-
92	29373205	9	rs372221996	G	C	0.98877	-0.0376767	0.00901655	2.5e-05	0.988159	-0.0447874	0.0120583	0.00018	0.989386	-0.0324837	0.0135728	0.021					cannabis dependence measurement; migraine disorder; motion sickness	Sherva R, JAMA Psychiatry, 2016; Pickrell JK, Nat Genet, 2016; Hromatka BS, Hum Mol Genet, 2015	-
93	29403839	9	rs10969123	T	G	0.965721	-0.0180423	0.00516051	0.00037	0.965638	-0.0321954	0.00714884	4.4e-06	0.965804	-0.00522526	0.00748337	0.54	0.965638	-0.0321954	0.00714884	0.00830877	gut microbiome measurement	Bonder MJ, Nat Genet, 2016	-
94	29483185	9	rs376758705	C	T	0.989232	-0.0411842	0.00925893	7.3e-06	0.989112	-0.0485748	0.012681	0.00011	0.989354	-0.0355067	0.0135816	0.011					-	-	-
95	29487224	9	rs368189232	T	G	0.988545	-0.0389063	0.00894244	1.1e-05	0.988121	-0.0457237	0.0120777	0.00014	0.988972	-0.0335684	0.0133136	0.014					-	-	-
96	29572480	9	rs372437915	C	A	0.986892	-0.0338492	0.0083948	4.9e-05	0.987087	-0.0470687	0.0116755	4.6e-05	0.986695	-0.020657	0.0121265	0.1					serum alanine aminotransferase measurement, alcohol consumption measurement; airway responsiveness measurement, chronic obstructive pulmonary disease	Whitfield JB, Alcohol Clin Exp Res, 2018; Hansel NN, Am J Respir Cell Mol Biol, 2014	-
97	29580596	9	rs569969863	T	C	0.986791	-0.0322275	0.0083146	9.4e-05	0.986923	-0.0438533	0.0114808	0.00011	0.986657	-0.0202725	0.0120962	0.11					serum alanine aminotransferase measurement, alcohol consumption measurement; airway responsiveness measurement, chronic obstructive pulmonary disease	Whitfield JB, Alcohol Clin Exp Res, 2018; Hansel NN, Am J Respir Cell Mol Biol, 2014	-
98	29600677	9	rs374650663	T	C	0.986879	-0.0328583	0.00835665	7.6e-05	0.986633	-0.0424414	0.0114058	0.00017	0.987128	-0.0241925	0.0123023	0.057					-	-	-
99	29601615	9	rs373924997	C	T	0.988289	-0.0381155	0.00883317	1.4e-05	0.98838	-0.0530575	0.0122067	1.2e-05	0.988196	-0.0241865	0.0128402	0.065					-	-	-
100	29602711	9	rs574134243	T	C	0.988225	-0.0376644	0.00880758	1.7e-05	0.98833	-0.0523891	0.0121793	1.4e-05	0.98812	-0.0239614	0.0127947	0.067					-	-	-
101	29608226	9	rs368641709	A	C	0.988181	-0.0373804	0.0087985	1.9e-05	0.988279	-0.0521783	0.0121668	1.5e-05	0.988082	-0.0235848	0.0127814	0.071					systemic lupus erythematosus, lupus nephritis	Chung SA, J Am Soc Nephrol, 2014	-
102	29630500	9	rs368346035	T	A	0.986575	-0.0349419	0.00833104	2.4e-05	0.98662	-0.0444062	0.0115162	9.7e-05	0.98653	-0.0261367	0.0121067	0.033					systemic lupus erythematosus, lupus nephritis	Chung SA, J Am Soc Nephrol, 2014	RP11-48L13.1
103	29631187	9	rs369645701	G	A	0.986525	-0.0351619	0.00828647	1.9e-05	0.986601	-0.0443144	0.0114835	9.5e-05	0.986447	-0.0266981	0.012012	0.028					systemic lupus erythematosus, lupus nephritis	Chung SA, J Am Soc Nephrol, 2014	RP11-48L13.1
104	29635844	9	rs369030584	A	G	0.986841	-0.035895	0.00834212	1.5e-05	0.986948	-0.0472171	0.011565	3.8e-05	0.986734	-0.0260561	0.0120882	0.034					systemic lupus erythematosus, lupus nephritis	Chung SA, J Am Soc Nephrol, 2014	RP11-48L13.1
105	29657794	9	rs59518950	A	T	0.984865	-0.0330601	0.00781882	2e-05	0.985554	-0.0452649	0.0110686	3.8e-05	0.984171	-0.0239189	0.0111094	0.033					-	-	RP11-48L13.1
106	29665934	9	rs114718251	A	G	0.985261	-0.0341564	0.00785917	1.2e-05	0.985541	-0.0396367	0.0109292	0.00027	0.984978	-0.0306088	0.0113542	0.008	0.985541	-0.0396367	0.0109292	0.561805	-	-	-
107	29676822	9	9:29676822	T	C	0.987199	-0.0388438	0.00835307	2.7e-06	0.987636	-0.0456866	0.0117525	8.8e-05	0.986759	-0.0335412	0.0119351	0.0052	0.987636	-0.0456866	0.0117525	0.462733	-	-	-
108	29699583	9	rs192593364	T	A	0.986775	-0.0382926	0.00827168	3e-06	0.98703	-0.0457225	0.0115405	6.3e-05	0.986517	-0.032095	0.0119125	0.0076	0.98703	-0.0457225	0.0115405	0.405339	body mass index	Kichaev G, Am J Hum Genet, 2018	-
109	29708484	9	rs191157261	G	A	0.986743	-0.0382402	0.00826279	3e-06	0.986992	-0.0456074	0.0115274	6.5e-05	0.986492	-0.0320801	0.0119004	0.0075	0.986992	-0.0456074	0.0115274	0.408297	body mass index	Kichaev G, Am J Hum Genet, 2018	-
110	29729992	9	rs548307286	A	G	0.986651	-0.037518	0.00826248	4.6e-06	0.987062	-0.044831	0.0115696	9.1e-05	0.986238	-0.0315466	0.0118585	0.0084					body mass index; smoking status measurement	Kichaev G, Am J Hum Genet, 2018; Liu M, Nat Genet, 2019	-
111	29742049	9	rs545630922	C	A	0.984659	-0.0344563	0.00764035	5.8e-06	0.984866	-0.0408662	0.0106428	0.00011	0.984451	-0.0297083	0.01102	0.0076					smoking status measurement	Liu M, Nat Genet, 2019	-
112	29742902	9	rs181469486	T	C	0.984529	-0.0342692	0.00762203	6.2e-06	0.984791	-0.0407208	0.0106383	0.00012	0.984266	-0.0294664	0.0109728	0.0078	0.984791	-0.0407208	0.0106383	0.455792	smoking status measurement	Liu M, Nat Genet, 2019	-
113	29796379	9	rs371569093	A	T	0.987408	-0.0373368	0.00847048	8.6e-06	0.987774	-0.0493842	0.0118927	2.8e-05	0.987039	-0.0275226	0.0121264	0.024					smoking status measurement; high density lipoprotein cholesterol measurement	Liu M, Nat Genet, 2019; Comuzzie AG, PLoS One, 2012	-
114	29803180	9	rs367701471	T	G	0.9875	-0.0371523	0.00852772	1.1e-05	0.987869	-0.0493696	0.0119799	3.2e-05	0.987128	-0.0271	0.0122018	0.027					smoking status measurement; high density lipoprotein cholesterol measurement	Liu M, Nat Genet, 2019; Comuzzie AG, PLoS One, 2012	RP11-460C6.1
115	29809661	9	rs143019647	T	C	0.98002	-0.0244049	0.00674581	0.00028	0.980343	-0.0368994	0.00940206	7.5e-05	0.979693	-0.013629	0.00972454	0.16	0.980343	-0.0368994	0.00940206	0.0814517	smoking status measurement	Liu M, Nat Genet, 2019	RP11-460C6.1
116	29827816	9	rs368867736	T	C	0.987719	-0.036617	0.00865638	2e-05	0.987869	-0.0452259	0.0120075	0.00014	0.987567	-0.0294309	0.0125366	0.019					-	-	RP11-460C6.1
117	31001857	9	rs7872250	C	T	0.81511	0.00967393	0.00237621	4.3e-05	0.819026	0.0123725	0.0032904	0.00018	0.811161	0.00746383	0.00344788	0.025					-	-	HSPA8P17
118	31002197	9	rs7875444	A	C	0.775307	0.00869489	0.00222229	8.9e-05	0.783024	0.0117551	0.00309798	0.00015	0.767527	0.00577099	0.00320505	0.073					-	-	HSPA8P17
119	31003452	9	rs10970046	G	A	0.357803	-0.00773621	0.00196791	9.1e-05	0.352385	-0.00919058	0.00270384	0.00062	0.363266	-0.00603181	0.00287804	0.035	0.352385	-0.00919058	0.00270384	0.417878	-	-	HSPA8P17
120	31004169	9	rs10813415	A	G	0.780593	0.00912578	0.00223699	4.3e-05	0.786778	0.0118585	0.00310672	0.00014	0.774358	0.00634303	0.00323731	0.047	0.786778	0.0118585	0.00310672	0.213154	-	-	HSPA8P17
121	32460250	9	rs57271219	A	G	0.918501	-0.00836491	0.00339964	0.015	0.919442	-0.0193867	0.00469619	3.2e-05	0.917553	0.00190848	0.00494386	0.64					breast carcinoma; age at menarche, spine bone mineral density; erythrocyte count; hematocrit; hemoglobin measurement; blood protein measurement	Michailidou K, Nature, 2017; Tan LJ, J Clin Endocrinol Metab, 2015; Astle WJ, Cell, 2016; Emilsson V, Science, 2018	ACO1; DDX58
122	32461035	9	rs202069833	G	T	0.921966	-0.00774661	0.00342949	0.026	0.922407	-0.0183483	0.00473343	8.9e-05	0.921521	0.00267715	0.00499136	0.53	0.922407	-0.0183483	0.00473343	0.00196474	breast carcinoma; age at menarche, spine bone mineral density; erythrocyte count; hematocrit; hemoglobin measurement; blood protein measurement	Michailidou K, Nature, 2017; Tan LJ, J Clin Endocrinol Metab, 2015; Astle WJ, Cell, 2016; Emilsson V, Science, 2018	ACO1; DDX58
123	32461771	9	rs16924138	C	T	0.922033	-0.00786008	0.00343877	0.024	0.922609	-0.0184542	0.00475452	8.7e-05	0.921451	0.00250155	0.00499622	0.55	0.922609	-0.0184542	0.00475452	0.00208967	breast carcinoma; age at menarche, spine bone mineral density; erythrocyte count; hematocrit; hemoglobin measurement; blood protein measurement	Michailidou K, Nature, 2017; Tan LJ, J Clin Endocrinol Metab, 2015; Astle WJ, Cell, 2016; Emilsson V, Science, 2018	ACO1; DDX58
124	32467865	9	rs61757209	G	A	0.923233	-0.00765757	0.00345585	0.028	0.924931	-0.0185711	0.0047906	8.8e-05	0.921521	0.00288294	0.00500848	0.51					breast carcinoma; age at menarche, spine bone mineral density; erythrocyte count; hematocrit; hemoglobin measurement	Michailidou K, Nature, 2017; Tan LJ, J Clin Endocrinol Metab, 2015; Astle WJ, Cell, 2016	ACO1; DDX58
125	32581172	9	rs635443	A	C	0.878861	-0.0078462	0.00304956	0.0084	0.879094	-0.0162073	0.00417783	8e-05	0.878625	-0.00060112	0.00447204	0.91					erythrocyte count; response to vaccine, cytokine measurement; chemokine (C-C motif) ligand 27 measurement	Kichaev G, Am J Hum Genet, 2018; Kennedy RB, Hum Genet, 2012; Ahola-Olli AV, Am J Hum Genet, 2016	TOPORS-AS1; NDUFB6; AL353671.4; RP11-205M20.7; GVQW1
126	33549332	9	rs7025859	T	A	0.659811	-0.0082033	0.00206033	8.2e-05	0.659336	-0.00738297	0.0028278	0.0092	0.66029	-0.00908783	0.00301569	0.0022					-	-	ANKRD18B; RP11-255A11.4
127	33821739	9	rs180789172	G	A	0.988409	-0.0101377	0.00924317	0.25	0.988746	0.0290267	0.0130096	0.028	0.988069	-0.0501012	0.0132023	0.00019	0.988746	0.0290267	0.0130096	1.53495e-05	heel bone mineral density; bipolar disorder	Kichaev G, Am J Hum Genet, 2018; Ferreira MA, Nat Genet, 2008; Liu Y, Mol Psychiatry, 2010	PRSS3; RP11-133O22.6; UBE2R2; Y_RNA
128	38487113	9	rs12350396	T	C	0.855802	-0.00468127	0.00274864	0.095	0.85986	0.00932545	0.00380786	0.013	0.851711	-0.018417	0.0039868	8.2e-06	0.85986	0.00932545	0.00380786	3.46351e-07	-	-	RP11-403F21.3; RP11-392E22.1; VN1R48P
129	38675111	9	rs114112138	G	A	0.981891	-0.0122706	0.00737532	0.091	0.980457	0.0144599	0.00977912	0.15	0.983338	-0.0462037	0.0112155	5.3e-05	0.980457	0.0144599	0.00977912	3.65293e-05	antioxidant measurement; CCL2 measurement; stromal cell-derived factor 1 alpha measurement	Comuzzie AG, PLoS One, 2012; Ahola-Olli AV, Am J Hum Genet, 2016	RNU6-765P
130	44107073	9	rs150403495	C	T	0.943967	-0.00902239	0.00404674	0.024	0.946486	0.00334798	0.00567874	0.57	0.941427	-0.0227206	0.00579738	9e-05	0.946486	0.00334798	0.00567874	0.00114068	-	-	ANKRD20A7P; RNU6-599P
131	44131332	9	rs28671510	C	A	0.959308	-0.0116291	0.0051989	0.023	0.960617	0.00322478	0.00728019	0.68	0.957988	-0.0292416	0.00746177	9.8e-05					-	-	ANKRD20A7P; RNU6-599P; MEP1AP4
132	66260556	9	rs148868766	C	G	0.945563	-0.00854015	0.00426084	0.044	0.94783	0.00623005	0.00597473	0.3	0.943278	-0.0248821	0.00610822	4.6e-05	0.94783	0.00623005	0.00597473	0.000226279	-	-	-
133	66260578	9	rs184361426	A	G	0.945563	-0.00854015	0.00426084	0.044	0.94783	0.00623005	0.00597473	0.3	0.943278	-0.0248821	0.00610822	4.6e-05	0.94783	0.00623005	0.00597473	0.000226279	-	-	-
134	66268699	9	rs114093576	G	A	0.930327	-0.00474011	0.00368527	0.2	0.930356	0.00984587	0.00505656	0.051	0.930298	-0.0204398	0.00539566	0.00014	0.930356	0.00984587	0.00505656	3.35706e-05	-	-	-
135	66302200	9	rs144327621	A	G	0.950279	-0.0090861	0.00460606	0.045	0.952157	0.00684835	0.0064283	0.3	0.948385	-0.0272215	0.00663255	4e-05	0.952157	0.00684835	0.0064283	0.000187201	-	-	-
136	73209389	9	rs10117808	C	T	0.906242	0.0125737	0.00319575	8e-05	0.907343	0.0153672	0.00444648	0.0006	0.905132	0.0106919	0.00461462	0.025	0.907343	0.0153672	0.00444648	0.459976	venous thromboembolism	Heit JA, Thromb Haemost, 2017	TRPM3; Metazoa_SRP
137	76645014	9	rs181462683	T	C	0.983082	0.0153744	0.00736549	0.033	0.98211	0.0409586	0.00975459	2.8e-05	0.984063	-0.0111085	0.0112145	0.41	0.98211	0.0409586	0.00975459	0.000389082	chronotype measurement	Kichaev G, Am J Hum Genet, 2018	-
138	82535249	9	rs114100205	G	T	0.956005	-0.0113232	0.0046425	0.014	0.955368	0.00695312	0.00633685	0.29	0.956646	-0.0284805	0.00683404	4.9e-05	0.955368	0.00695312	0.00633685	0.000117936	serum alanine aminotransferase measurement, response to combination chemotherapy, acute lymphoblastic leukemia	Liu Y, Clin Pharmacol Ther, 2017	-
139	82545908	9	rs114371248	G	A	0.95369	-0.0109842	0.00448693	0.013	0.953255	0.00597672	0.00611862	0.34	0.954127	-0.0274467	0.00661161	4.9e-05	0.953255	0.00597672	0.00611862	0.000171611	serum alanine aminotransferase measurement, response to combination chemotherapy, acute lymphoblastic leukemia	Liu Y, Clin Pharmacol Ther, 2017	-
140	82550837	9	rs116439265	G	A	0.956296	-0.0113698	0.00454995	0.012	0.955842	0.00694367	0.00620194	0.27	0.956754	-0.0289881	0.00670744	2.5e-05	0.955842	0.00694367	0.00620194	6.79431e-05	serum alanine aminotransferase measurement, response to combination chemotherapy, acute lymphoblastic leukemia	Liu Y, Clin Pharmacol Ther, 2017	-
141	82554158	9	rs114959528	A	G	0.955282	-0.0104674	0.00450559	0.019	0.954706	0.00632074	0.00613583	0.32	0.955864	-0.0268198	0.00664854	8.4e-05	0.954706	0.00632074	0.00613583	0.000207488	serum alanine aminotransferase measurement, response to combination chemotherapy, acute lymphoblastic leukemia	Liu Y, Clin Pharmacol Ther, 2017	-
142	82556997	9	rs79626488	G	A	0.936528	-0.00783089	0.00384136	0.041	0.937263	0.00711739	0.00526185	0.18	0.935786	-0.022537	0.00563405	8.1e-05					serum alanine aminotransferase measurement, response to combination chemotherapy, acute lymphoblastic leukemia	Liu Y, Clin Pharmacol Ther, 2017	-
143	84129568	9	rs138123311	G	T	0.989093	-0.0369079	0.00923256	7e-05	0.989616	-0.0376957	0.0130476	0.0038	0.988565	-0.0388906	0.0131384	0.0028	0.989616	-0.0376957	0.0130476	0.94789	-	-	-
144	84132677	9	rs77503442	C	T	0.988909	-0.0370585	0.00922209	6.5e-05	0.989452	-0.0379063	0.0130412	0.0036	0.988362	-0.0389801	0.0131159	0.0027					-	-	-
145	84142655	9	9:84142655	G	C	0.988593	-0.0381746	0.00912835	3.2e-05	0.989238	-0.0391945	0.0129519	0.0025	0.987942	-0.0399139	0.0129437	0.0019	0.989238	-0.0391945	0.0129519	0.968261	-	-	-
146	84142656	9	rs183749581	C	G	0.988168	-0.038237	0.00907234	2.8e-05	0.988878	-0.0407719	0.0128827	0.0015	0.987452	-0.0386109	0.0128553	0.0025	0.988878	-0.0407719	0.0128827	0.90428	-	-	-
147	84151677	9	rs150577563	G	T	0.988732	-0.0372371	0.00933748	7.2e-05	0.989478	-0.0355148	0.0133048	0.0075	0.98798	-0.0418338	0.0131908	0.0014	0.989478	-0.0355148	0.0133048	0.732664	-	-	-
148	84151913	9	rs181832143	A	T	0.988732	-0.0372371	0.00933748	7.2e-05	0.989478	-0.0355148	0.0133048	0.0075	0.98798	-0.0418338	0.0131908	0.0014	0.989478	-0.0355148	0.0133048	0.732664	-	-	-
149	84156516	9	rs370829092	C	A	0.987209	-0.035403	0.00897762	8.7e-05	0.988134	-0.0322808	0.0128221	0.012	0.986276	-0.0398465	0.0126569	0.0014					-	-	-
150	84517341	9	rs116682956	T	A	0.964688	0.00823778	0.00519167	0.1	0.964244	0.0302345	0.0071115	2.2e-05	0.965136	-0.010454	0.00761447	0.18	0.964244	0.0302345	0.0071115	7.6526e-05	serum IgG glycosylation measurement	Lauc G, PLoS Genet, 2013	RNA5SP287; SNORD95; SPATA31D5P
151	84520255	9	rs116626680	G	A	0.941886	0.0100029	0.00405853	0.013	0.939907	0.0248288	0.00553052	6.6e-06	0.943882	-0.00285396	0.00598564	0.64	0.939907	0.0248288	0.00553052	0.000581462	serum IgG glycosylation measurement	Lauc G, PLoS Genet, 2013	RNA5SP287; SNORD95; SPATA31D5P; RP11-383M4.2; SPATA31D4; RP11-383M4.6
152	84523530	9	rs116224360	G	C	0.964774	0.0084565	0.00519503	0.097	0.964276	0.030456	0.00711255	1.9e-05	0.965276	-0.0102965	0.00762336	0.19	0.964276	0.030456	0.00711255	7.54209e-05	serum IgG glycosylation measurement	Lauc G, PLoS Genet, 2013	RNA5SP287; SNORD95; SPATA31D5P; RP11-383M4.2; SPATA31D4; RP11-383M4.6
153	84526827	9	rs116098305	G	C	0.943615	0.0103132	0.00411413	0.011	0.941572	0.026526	0.00559257	1.9e-06	0.945675	-0.00427582	0.00608349	0.49	0.941572	0.026526	0.00559257	0.000160076	serum IgG glycosylation measurement	Lauc G, PLoS Genet, 2013	SNORD95; SPATA31D5P; RP11-383M4.2; SPATA31D4; RP11-383M4.6
154	84530498	9	rs114426311	C	A	0.921044	0.0138741	0.00353109	8.5e-05	0.919909	0.023704	0.00487259	1.1e-06	0.922189	0.00610403	0.00514054	0.24	0.919909	0.023704	0.00487259	0.0118508	serum IgG glycosylation measurement	Lauc G, PLoS Genet, 2013	SPATA31D5P; RP11-383M4.2; SPATA31D4; RP11-383M4.6
155	85131415	9	rs143193719	C	T	0.985248	0.015644	0.00799232	0.046	0.98375	0.0428735	0.0105175	5.2e-05	0.986759	-0.0141383	0.0122656	0.26	0.98375	0.0428735	0.0105175	0.000352839	mean corpuscular hemoglobin; pulse pressure measurement; insulin resistance	Kichaev G, Am J Hum Genet, 2018; Evangelou E, Nat Genet, 2018; Irvin MR, PLoS One, 2011	RP11-15B24.5
156	90665758	9	rs73655233	C	T	0.939799	-0.0130214	0.00393632	0.00079	0.940796	-0.0220392	0.00553355	7.9e-05	0.938794	-0.00522465	0.00562879	0.27					cleft palate, sex interaction measurement, cleft lip	Carlson JC, Genet Epidemiol, 2018	RP11-350E12.4
157	91984571	9	rs7856532	T	G	0.579174	-0.00666039	0.00189096	0.00034	0.590714	-0.0107578	0.00260553	3.3e-05	0.56754	-0.00343215	0.00275984	0.18					reticulocyte count; blood protein measurement	Astle WJ, Cell, 2016; Sun BB, Nature, 2018; Emilsson V, Science, 2018	SECISBP2; SEMA4D
158	92313060	9	9:92313060	G	A	0.545683	0.00445843	0.00190276	0.022	0.54549	0.0102465	0.00261236	9e-05	0.545879	-0.00172324	0.00278415	0.48	0.54549	0.0102465	0.00261236	0.00149744	-	-	RP11-316P17.2
159	92313997	9	9:92313997	A	G	0.545484	0.00453252	0.00189876	0.02	0.54525	0.0102547	0.00260927	8.9e-05	0.54572	-0.00153079	0.00277567	0.52	0.54525	0.0102547	0.00260927	0.0017296	-	-	RP11-316P17.2
160	92314142	9	9:92314142	A	G	0.546634	0.00449738	0.00189856	0.021	0.546581	0.0103632	0.00260889	7.4e-05	0.546687	-0.00174126	0.00277551	0.48	0.546581	0.0103632	0.00260889	0.00128983	-	-	RP11-316P17.2
161	92314302	9	9:92314302	T	C	0.54663	0.00449654	0.00189856	0.021	0.546581	0.0103632	0.00260889	7.4e-05	0.54668	-0.00174291	0.00277551	0.48	0.546581	0.0103632	0.00260889	0.00128786	-	-	RP11-316P17.2
162	92315343	9	9:92315343	A	G	0.547463	0.00433408	0.00189171	0.026	0.547533	0.0102303	0.00260081	8.7e-05	0.547393	-0.00197649	0.00276405	0.42	0.547533	0.0102303	0.00260081	0.00112472	-	-	RP11-316P17.2
163	92315411	9	9:92315411	C	T	0.547463	0.00433408	0.00189171	0.026	0.547533	0.0102303	0.00260081	8.7e-05	0.547393	-0.00197649	0.00276405	0.42	0.547533	0.0102303	0.00260081	0.00112472	-	-	RP11-316P17.2
164	92315487	9	9:92315487	G	T	0.547954	0.0043065	0.00189173	0.027	0.547868	0.0101615	0.00260134	9.8e-05	0.548041	-0.00195314	0.00276356	0.43	0.547868	0.0101615	0.00260134	0.00122618	-	-	RP11-316P17.2
165	93865035	9	rs74744940	G	A	0.981708	-0.014944	0.00718192	0.034	0.983195	-0.0506609	0.0102616	7.4e-07	0.980209	0.0133178	0.0101227	0.18					-	-	RP11-305L7.1; RP11-305L7.6; RP11-305L7.3
166	96537038	9	rs148394239	T	C	0.987212	-0.0371073	0.00871345	2.2e-05	0.987276	-0.0319783	0.0119589	0.0078	0.987147	-0.0417118	0.0127541	0.0012	0.987276	-0.0319783	0.0119589	0.572881	-	-	-
167	96559469	9	rs141756516	G	C	0.987747	-0.0375755	0.00884878	2.2e-05	0.987655	-0.0335232	0.0120525	0.0056	0.98784	-0.0419351	0.0130549	0.0015	0.987655	-0.0335232	0.0120525	0.631608	DNA methylation	Renteria ME, Twin Res Hum Genet, 2013	MIR4291
168	96588511	9	rs145011877	C	G	0.988444	-0.0388412	0.00895801	1.5e-05	0.988285	-0.0344828	0.0121885	0.0049	0.988603	-0.0442566	0.0132307	0.00091	0.988285	-0.0344828	0.0121885	0.58216	heel bone mineral density	Kichaev G, Am J Hum Genet, 2018	MIR4291
169	96612642	9	rs142440169	T	C	0.988352	-0.0385901	0.00895579	1.7e-05	0.988235	-0.0351246	0.0122106	0.0042	0.98847	-0.0431229	0.0131988	0.0012	0.988235	-0.0351246	0.0122106	0.652356	heel bone mineral density	Morris JA, Nat Genet, 2018; Kim SK, PLoS One, 2018	RP11-53B5.1
170	96624759	9	rs139706957	T	C	0.987719	-0.036311	0.00889105	4.7e-05	0.987837	-0.0366446	0.0122171	0.0028	0.987599	-0.0356213	0.0129984	0.0067	0.987837	-0.0366446	0.0122171	0.953672	heel bone mineral density	Morris JA, Nat Genet, 2018; Kim SK, PLoS One, 2018	RP11-53B5.1
171	97327450	9	rs111698561	G	A	0.902964	-0.00993362	0.00314256	0.0017	0.901495	-3.02362e-06	0.00432591	0.98	0.904445	-0.0200679	0.00458617	1.2e-05	0.901495	-3.02362e-06	0.00432591	0.00126756	body height; t-tau:beta-amyloid 1-42 ratio measurement	Kim JJ, J Hum Genet, 2009; Li J, Neurobiol Aging, 2017	PCAT7; FBP2
172	99206311	9	rs145929424	C	T	0.974363	-0.0238236	0.00596199	5.9e-05	0.975971	-0.0153079	0.00846724	0.068	0.972742	-0.0322162	0.00844781	0.00013	0.975971	-0.0153079	0.00846724	0.152228	resting heart rate; platelet count; platelet component distribution width; platelet crit; body height	Eppinga RN, Nat Genet, 2016; Astle WJ, Cell, 2016; Wood AR, Nat Genet, 2014	HABP4
173	99267080	9	rs111630654	C	T	0.950152	-0.0159469	0.00427845	0.00019	0.951205	-0.00691142	0.00594005	0.24	0.949091	-0.0244108	0.00619112	6.4e-05	0.951205	-0.00691142	0.00594005	0.0388645	intelligence; intelligence, self reported educational attainment; mathematical ability; cognitive function measurement	Lam M, Cell Rep, 2017; Hill WD, Mol Psychiatry, 2018; Lee JJ, Nat Genet, 2018; Davies G, Nat Commun, 2018; Savage JE, Nat Genet, 2018	HABP4; CDC14B
174	104243380	9	rs147940477	G	A	0.985825	-0.0120624	0.00828345	0.15	0.986084	0.0220796	0.0114262	0.056	0.985563	-0.0438401	0.0120632	0.00045	0.986084	0.0220796	0.0114262	5.87094e-05	colorectal cancer; age-related cataract; alkaline phosphatase measurement	Hofer P, Oncotarget, 2017; Ritchie MD, Mol Vis, 2014; Kanai M, Nat Genet, 2018; Chambers JC, Nat Genet, 2011	RP11-490D19.6; TMEM246; RP11-490D19.8
175	104946537	9	rs56917978	T	C	0.603189	-0.00499624	0.00190385	0.0094	0.599098	-0.010592	0.00262031	5.2e-05	0.607314	0.00103888	0.00277917	0.79					response to clozapine; ovarian mucinous adenocarcinoma	Adkins DE, Mol Psychiatry, 2010; Phelan CM, Nat Genet, 2017	-
176	105434438	9	rs116317707	G	A	0.942602	-0.00279595	0.00409117	0.54	0.942436	-0.0177073	0.005595	0.0016	0.942769	0.0142197	0.00601036	0.018	0.942436	-0.0177073	0.005595	8.22897e-05	body weight; caudate nucleus measurement, functional brain measurement, response to reward	Comuzzie AG, PLoS One, 2012; Qian DC, BMC Genomics, 2017	LINC00587
177	109481120	9	rs114553896	T	C	0.948638	-0.0176514	0.00425742	3.7e-05	0.951855	-0.0132349	0.00598026	0.026	0.945396	-0.0216001	0.00609473	0.00068	0.951855	-0.0132349	0.00598026	0.321103	heel bone mineral density; FEV/FEC ratio	Morris JA, Nat Genet, 2018; Wyss AB, Nat Commun, 2018; Kichaev G, Am J Hum Genet, 2018; Shrine N, Nat Genet, 2019; Kim SK, PLoS One, 2018	RP11-308N19.4; RP11-308N19.5
178	109481441	9	rs9695315	T	C	0.948638	-0.0176514	0.00425742	3.7e-05	0.951855	-0.0132349	0.00598026	0.026	0.945396	-0.0216001	0.00609473	0.00068					heel bone mineral density; FEV/FEC ratio	Morris JA, Nat Genet, 2018; Wyss AB, Nat Commun, 2018; Kichaev G, Am J Hum Genet, 2018; Shrine N, Nat Genet, 2019; Kim SK, PLoS One, 2018	RP11-308N19.4; RP11-308N19.5
179	109481750	9	rs1994678	A	G	0.948445	-0.0175145	0.0042525	4.2e-05	0.951527	-0.0129526	0.00596526	0.03	0.945338	-0.0215841	0.0060952	0.00068	0.951527	-0.0129526	0.00596526	0.305363	heel bone mineral density; FEV/FEC ratio	Morris JA, Nat Genet, 2018; Wyss AB, Nat Commun, 2018; Kichaev G, Am J Hum Genet, 2018; Shrine N, Nat Genet, 2019; Kim SK, PLoS One, 2018	RP11-308N19.4; RP11-308N19.5
180	109550497	9	rs7870572	G	A	0.245883	0.00701231	0.00214509	0.0012	0.247918	0.00126433	0.00296468	0.71	0.243831	0.013032	0.00311795	3.5e-05					neuroticism measurement	Kichaev G, Am J Hum Genet, 2018	-
181	109550508	9	rs7856638	T	C	0.244366	0.00666883	0.00215914	0.0021	0.245773	0.00104337	0.00299101	0.76	0.242947	0.0125446	0.00313112	7.4e-05					neuroticism measurement	Kichaev G, Am J Hum Genet, 2018	-
182	109551109	9	rs12350959	G	T	0.244407	0.0066971	0.00215931	0.002	0.245849	0.000983404	0.00299101	0.78	0.242953	0.0126716	0.00313162	6.2e-05	0.245849	0.000983404	0.00299101	0.00626676	neuroticism measurement	Kichaev G, Am J Hum Genet, 2018	-
183	109551330	9	rs13292392	T	C	0.219797	0.00762584	0.00223523	0.00071	0.22365	0.000412394	0.00308032	0.92	0.215912	0.015345	0.00325882	4.9e-06	0.22365	0.000412394	0.00308032	0.000744886	neuroticism measurement	Kichaev G, Am J Hum Genet, 2018	-
184	109551450	9	rs10978640	T	C	0.102233	0.00873928	0.00313503	0.0049	0.105362	-0.0032826	0.00427607	0.42	0.0990778	0.0215063	0.00461945	4.6e-06	0.105362	-0.0032826	0.00427607	6.65844e-05	neuroticism measurement	Kichaev G, Am J Hum Genet, 2018	-
185	109551468	9	rs55766326	A	G	0.217751	0.00771207	0.00224711	0.00065	0.22131	0.000513101	0.00309694	0.9	0.214163	0.015376	0.00327578	5.2e-06					neuroticism measurement	Kichaev G, Am J Hum Genet, 2018	-
186	111100388	9	rs1323391	C	T	0.187674	0.00167341	0.0023889	0.49	0.192026	-0.00790105	0.00326135	0.016	0.183287	0.0112704	0.00351677	0.0027	0.192026	-0.00790105	0.00326135	5.16384e-05	heel bone mineral density	Morris JA, Nat Genet, 2018	AL137019.1
187	111100749	9	rs1923965	G	T	0.180444	0.0013029	0.00242437	0.6	0.185661	-0.00818728	0.00329685	0.014	0.175184	0.0113323	0.00358416	0.0035	0.185661	-0.00818728	0.00329685	4.92253e-05	heel bone mineral density	Morris JA, Nat Genet, 2018	AL137019.1
188	111108772	9	rs10816660	A	G	0.13508	0.000171916	0.00274206	0.94	0.139862	-0.0104395	0.00371332	0.0053	0.130259	0.0109928	0.00407215	0.011	0.139862	-0.0104395	0.00371332	8.20034e-05	heel bone mineral density	Morris JA, Nat Genet, 2018	AL137019.1
189	111111067	9	rs10816661	A	G	0.122799	-0.000620994	0.00284835	0.84	0.127107	-0.0120388	0.00385532	0.0019	0.118456	0.0112088	0.00423208	0.013	0.127107	-0.0120388	0.00385532	3.91458e-05	heel bone mineral density	Morris JA, Nat Genet, 2018; Kichaev G, Am J Hum Genet, 2018	AL137019.1
190	114373103	9	rs368254778	G	A	0.980878	-0.0265551	0.00696226	9.6e-05	0.984645	-0.0267632	0.0107958	0.012	0.97708	-0.0241285	0.00923351	0.0035					monocyte count; blood protein measurement	Crosslin DR, Hum Mol Genet, 2013; Sun BB, Nature, 2018	PTGR1; LRRC37A5P; DNAJC25; DNAJC25-GNG10
191	114382435	9	rs10817196	T	G	0.44409	0.00759678	0.00188927	3.9e-05	0.442316	0.00247836	0.00259296	0.31	0.445879	0.0123228	0.00276542	6.7e-06	0.442316	0.00247836	0.00259296	0.00853951	blood protein measurement	Sun BB, Nature, 2018	PTGR1; LRRC37A5P; DNAJC25; DNAJC25-GNG10
192	114382444	9	rs10817197	G	A	0.444515	0.0075957	0.00188056	3.6e-05	0.442972	0.00234752	0.00258035	0.33	0.44607	0.0124361	0.00275339	4.8e-06	0.442972	0.00234752	0.00258035	0.00677699	blood protein measurement	Sun BB, Nature, 2018	PTGR1; LRRC37A5P; DNAJC25; DNAJC25-GNG10
193	114383053	9	rs6477833	A	C	0.438279	0.00723778	0.00188871	8.8e-05	0.436879	0.00169762	0.00259155	0.47	0.439691	0.0123087	0.0027653	6.9e-06					blood protein measurement	Sun BB, Nature, 2018	PTGR1; LRRC37A5P; DNAJC25; DNAJC25-GNG10
194	114387135	9	rs7875749	A	G	0.440214	0.0074159	0.00189019	6e-05	0.43814	0.00173	0.00259961	0.46	0.442305	0.0125672	0.00276096	4.3e-06					blood protein measurement	Sun BB, Nature, 2018	PTGR1; LRRC37A5P; DNAJC25; DNAJC25-GNG10
195	117701208	9	rs74507527	G	C	0.980963	-0.0297985	0.00755513	8.3e-05	0.980463	-0.017551	0.0103106	0.091	0.981468	-0.043462	0.0111239	8.9e-05					eosinophil count; forced expiratory volume, response to bronchodilator, chronic obstructive pulmonary disease; ankylosing spondylitis, psoriasis, ulcerative colitis, Crohn's disease, sclerosing cholangitis; mosquito bite reaction size measurement; neutrophil percentage of granulocytes; eosinophil percentage of granulocytes; basophil count, eosinophil count; eosinophil percentage of leukocytes	Kichaev G, Am J Hum Genet, 2018; Lutz SM, BMC Genet, 2015; Ellinghaus D, Nat Genet, 2016; Jones AV, Hum Mol Genet, 2017; Astle WJ, Cell, 2016	TNFSF8
196	117744653	9	rs112403020	T	C	0.966585	-0.0208155	0.00549347	0.00016	0.968673	-0.0102607	0.00788482	0.2	0.964481	-0.0327114	0.00771274	2.5e-05	0.968673	-0.0102607	0.00788482	0.0392599	cerebral amyloid deposition measurement; colorectal cancer	Li QS, PLoS One, 2015; Hofer P, Oncotarget, 2017	-
197	118961598	9	rs115036752	G	T	0.955659	0.0177366	0.00449459	7.5e-05	0.954712	0.0176379	0.00605157	0.0037	0.956614	0.0191064	0.00671453	0.0027	0.954712	0.0176379	0.00605157	0.869319	smoking behavior, 3-hydroxypropylmercapturic acid measurement; Conotruncal heart malformations	Park SL, PLoS One, 2015; Agopian AJ, PLoS One, 2014	PAPPA; AL353141.1
198	118973396	9	rs116834405	C	T	0.959906	0.0189892	0.00471369	5.1e-05	0.958239	0.0193376	0.00629239	0.0022	0.961587	0.0208424	0.00711096	0.0021	0.958239	0.0193376	0.00629239	0.872496	smoking behavior, 3-hydroxypropylmercapturic acid measurement; Conotruncal heart malformations	Park SL, PLoS One, 2015; Agopian AJ, PLoS One, 2014	PAPPA; AL353141.1
199	118974689	9	rs75991265	C	T	0.957499	0.0181484	0.00459759	7.4e-05	0.956851	0.0182976	0.00620743	0.0034	0.958153	0.0193919	0.00684733	0.0029					smoking behavior, 3-hydroxypropylmercapturic acid measurement; Conotruncal heart malformations	Park SL, PLoS One, 2015; Agopian AJ, PLoS One, 2014	PAPPA; AL353141.1
200	118975115	9	rs115728013	T	C	0.957655	0.0187448	0.00463668	4.9e-05	0.957009	0.0186307	0.00625858	0.0031	0.958306	0.0202407	0.00690753	0.0021	0.957009	0.0186307	0.00625858	0.861142	smoking behavior, 3-hydroxypropylmercapturic acid measurement; Conotruncal heart malformations	Park SL, PLoS One, 2015; Agopian AJ, PLoS One, 2014	PAPPA; AL353141.1
201	119547897	9	rs10732198	A	G	0.0866228	0.013268	0.00340485	7.7e-05	0.0850555	0.0176457	0.00472311	0.00014	0.0882027	0.00927325	0.00493123	0.069	0.0850555	0.0176457	0.00472311	0.21431	-	-	ASTN2
202	119550176	9	rs7852805	A	C	0.117684	0.0102183	0.00289468	0.00035	0.115443	0.0159049	0.00400548	5.6e-05	0.119944	0.00426714	0.00420271	0.31					-	-	ASTN2
203	121678285	9	rs145675907	A	G	0.955362	-0.015521	0.00457248	0.00065	0.956075	-0.0271222	0.00629682	1.5e-05	0.954643	-0.00466976	0.00667006	0.48	0.956075	-0.0271222	0.00629682	0.0131772	-	-	-
204	121698757	9	rs115245846	A	G	0.971852	-0.0227715	0.00574984	5.8e-05	0.970988	-0.028733	0.0078318	0.0002	0.972723	-0.0171336	0.0084832	0.048	0.970988	-0.028733	0.0078318	0.30894	-	-	-
205	121699498	9	rs139029756	T	C	0.967865	-0.0187125	0.00537466	0.00043	0.967796	-0.0295371	0.00743128	6.3e-05	0.967934	-0.00836457	0.00780864	0.28	0.967796	-0.0295371	0.00743128	0.0466794	-	-	-
206	121702645	9	rs150483786	T	C	0.967865	-0.0187125	0.00537466	0.00043	0.967796	-0.0295371	0.00743128	6.3e-05	0.967934	-0.00836457	0.00780864	0.28	0.967796	-0.0295371	0.00743128	0.0466794	-	-	-
207	125321803	9	rs148060840	C	G	0.987152	0.0368067	0.00894813	3.4e-05	0.986853	0.0351286	0.0121666	0.0038	0.987452	0.0394383	0.013226	0.0023	0.986853	0.0351286	0.0121666	0.808107	-	-	OR1N2; OR1L8
208	128985610	9	rs144298348	A	G	0.984403	-0.0259815	0.00798368	0.0011	0.982999	-0.00991324	0.0105234	0.34	0.985818	-0.0490306	0.0122273	7e-05	0.982999	-0.00991324	0.0105234	0.014072	-	-	-
209	130974182	9	rs73611672	G	A	0.529389	-0.00644115	0.00185783	0.00059	0.535074	-0.00280356	0.0025738	0.27	0.523658	-0.0108033	0.00269463	5.1e-05					attention deficit hyperactivity disorder	Lesch KP, J Neural Transm (Vienna), 2008	CIZ1; DNM1
210	131416013	9	rs548102955	G	A	0.932534	-0.0105438	0.00412204	0.011	0.93604	0.00287835	0.00583795	0.59	0.929	-0.0230009	0.00585677	4.3e-05					axial length measurement	Cheng CY, Am J Hum Genet, 2013	SPTAN1; WDR34; VTI1BP4; HMGA1P4
211	131459959	9	rs80177312	A	G	0.915762	-0.00743121	0.00341833	0.031	0.915638	0.00322743	0.00472949	0.46	0.915887	-0.0198724	0.0049631	5e-05					waist-hip ratio; leukocyte count; Eczema; eosinophil count; IGFBP-3 measurement; serum gamma-glutamyl transferase measurement; platelet crit	Kichaev G, Am J Hum Genet, 2018; Comuzzie AG, PLoS One, 2012; Kanai M, Nat Genet, 2018; Astle WJ, Cell, 2016	SET; PKN3; RN7SL560P; ZDHHC12
212	131462846	9	rs115095846	C	T	0.915806	-0.00742285	0.00341797	0.031	0.915619	0.00323051	0.00472763	0.46	0.915995	-0.0198893	0.00496401	4.9e-05	0.915619	0.00323051	0.00472763	0.000636194	waist-hip ratio; leukocyte count; Eczema; eosinophil count; IGFBP-3 measurement; serum gamma-glutamyl transferase measurement; platelet crit	Kichaev G, Am J Hum Genet, 2018; Comuzzie AG, PLoS One, 2012; Kanai M, Nat Genet, 2018; Astle WJ, Cell, 2016	SET; PKN3; RN7SL560P; ZDHHC12; RP11-545E17.3
213	131492446	9	rs114839854	C	T	0.916462	-0.0083927	0.00342813	0.015	0.916244	0.00227736	0.0047532	0.59	0.916682	-0.0208355	0.00496689	2.2e-05	0.916244	0.00227736	0.0047532	0.000661947	waist-hip ratio; Eczema; eosinophil count; IGFBP-3 measurement	Kichaev G, Am J Hum Genet, 2018; Comuzzie AG, PLoS One, 2012	PKN3; RN7SL560P; ZDHHC12; RP11-545E17.3; ZER1; snoU13
214	131493204	9	rs80055395	C	T	0.916937	-0.00826456	0.00343843	0.017	0.916528	0.00253158	0.00476165	0.56	0.917349	-0.0208463	0.00498781	2.4e-05					waist-hip ratio; Eczema; eosinophil count; IGFBP-3 measurement	Kichaev G, Am J Hum Genet, 2018; Comuzzie AG, PLoS One, 2012	PKN3; RN7SL560P; ZDHHC12; RP11-545E17.3; ZER1; snoU13
215	131541613	9	rs190917982	G	A	0.917995	-0.00763248	0.00345683	0.028	0.917569	0.00394052	0.0047848	0.38	0.918424	-0.0208881	0.00501692	2.4e-05	0.917569	0.00394052	0.0047848	0.000286709	parental longevity	Pilling LC, Aging (Albany NY), 2016	ZER1; TBC1D13
216	132394648	9	rs2417143	G	T	0.0265233	-0.0100585	0.00577482	0.081	0.0255993	0.0134158	0.00806015	0.088	0.0274548	-0.0320621	0.00831394	0.0001	0.0255993	0.0134158	0.00806015	6.96273e-05	response to citalopram, antidepressant-induced dizziness, response to buspirone, response to antidepressant	Clark SL, Psychol Med, 2011	NTMT1; C9orf50; ASB6; RP11-483H20.4
217	132396281	9	rs10819551	G	C	0.0265106	-0.0101052	0.00575496	0.079	0.0255047	0.0137042	0.00804445	0.081	0.0275248	-0.032229	0.00827366	8.8e-05	0.0255047	0.0137042	0.00804445	5.54811e-05	-	-	NTMT1; C9orf50; ASB6; RP11-483H20.4
218	132401824	9	rs2302780	G	A	0.0266405	-0.0101303	0.00580534	0.081	0.0256813	0.0140008	0.00811131	0.077	0.0276075	-0.0326204	0.00834953	8.3e-05	0.0256813	0.0140008	0.00811131	4.98932e-05	-	-	NTMT1; C9orf50; ASB6; RP11-483H20.4
219	132405892	9	rs3814550	A	G	0.0235622	-0.0099558	0.00609909	0.1	0.0233409	0.0161184	0.00839037	0.046	0.0237853	-0.0361705	0.00890623	4.1e-05					-	-	NTMT1; C9orf50; ASB6; RP11-483H20.4; PRRX2
220	136191641	9	9:136191641	A	G	0.393527	0.00493118	0.00191166	0.011	0.395912	0.0105602	0.00262966	7e-05	0.391122	-5.7764e-05	0.00279182	0.96	0.395912	0.0105602	0.00262966	0.00505041	von Willebrand factor measurement; factor VIII measurement; Astigmatism; a disintegrin and metalloproteinase with thrombospondin motifs 13	Sabater-Lleal M, Circulation, 2018; Shah RL, Hum Genet, 2018; Suhre K, Nat Commun, 2017	Y_RNA; LCN1P2; SURF6; MED22; RP11-244N20.7; RPL7A; SNORD24
221	137657137	9	rs562818161	C	T									0.986403	-0.0555158	0.0119139	9.3e-07					-	-	COL5A1
222	137657295	9	rs527420162	G	C									0.986447	-0.0552429	0.0119581	1.1e-06					-	-	COL5A1
223	137669701	9	rs539060266	G	A	0.989904	-0.0324669	0.00924751	0.0004					0.986098	-0.0491079	0.0113766	5e-06					-	-	COL5A1
224	137669947	9	rs572632058	C	T	0.987763	-0.0253461	0.0084571	0.0024					0.983986	-0.0419477	0.01064	2.5e-05					-	-	COL5A1
225	138168114	9	rs2777325	C	T	0.179944	0.00551835	0.00245734	0.021	0.175328	-0.00312241	0.00344243	0.38	0.184597	0.0135768	0.00352628	9.5e-05					-	-	RP11-399H11.2; AL390778.1
226	138168556	9	rs1778979	G	A	0.269645	0.00407384	0.00214503	0.051	0.262667	-0.00414553	0.0029943	0.17	0.276679	0.0119914	0.00308917	8.8e-05	0.262667	-0.00414553	0.0029943	0.000145422	-	-	RP11-399H11.2; AL390778.1
227	138398514	9	rs7024781	G	A	0.931828	-0.00693543	0.00377432	0.07	0.932438	-0.020693	0.00514077	6.1e-05	0.931213	0.00586892	0.00556853	0.25					-	-	PPP1R26; C9orf116; MRPS2; RP11-426A6.5; LCN1; AL161452.1
228	138405994	9	rs148361061	G	C	0.935321	-0.00748231	0.00389019	0.054	0.935194	-0.0208101	0.00531071	9.4e-05	0.935449	0.00484618	0.00572567	0.33	0.935194	-0.0208101	0.00531071	0.000877391	subcutaneous adipose tissue measurement; subcutaneous adipose tissue measurement, sex interaction measurement	Gao C, Obesity (Silver Spring), 2017	C9orf116; MRPS2; RP11-426A6.5; LCN1; AL161452.1
229	138406063	9	rs377440613	G	A	0.939229	-0.00811703	0.00395981	0.039	0.939673	-0.0220145	0.00541642	4.8e-05	0.938781	0.00399167	0.00581624	0.41					subcutaneous adipose tissue measurement; subcutaneous adipose tissue measurement, sex interaction measurement	Gao C, Obesity (Silver Spring), 2017	C9orf116; MRPS2; RP11-426A6.5; LCN1; AL161452.1
230	138413701	9	rs112999544	T	C	0.941598	-0.00958835	0.00404801	0.018	0.942077	-0.0220407	0.00552595	6.2e-05	0.941115	0.00173033	0.00595823	0.65	0.942077	-0.0220407	0.00552595	0.0030519	subcutaneous adipose tissue measurement; subcutaneous adipose tissue measurement, sex interaction measurement	Gao C, Obesity (Silver Spring), 2017	C9orf116; MRPS2; RP11-426A6.5; LCN1; AL161452.1; OBP2A
231	138415000	9	9:138415000	G	T	0.986388	-0.00276826	0.00845682	0.71	0.986683	-0.0382188	0.0116775	0.00093	0.986091	0.0288963	0.0123029	0.016	0.986683	-0.0382188	0.0116775	6.14537e-05	subcutaneous adipose tissue measurement; subcutaneous adipose tissue measurement, sex interaction measurement	Gao C, Obesity (Silver Spring), 2017	C9orf116; MRPS2; RP11-426A6.5; LCN1; AL161452.1; OBP2A
232	138641650	9	rs11103160	G	A	0.918742	-0.00883566	0.00344753	0.011	0.917941	0.00121349	0.00472928	0.81	0.91955	-0.0203971	0.00504885	8.4e-05	0.917941	0.00121349	0.00472928	0.00155779	mathematical ability	Lee JJ, Nat Genet, 2018	KCNT1
233	139114308	9	9:139114308	T	C	0.736607	-0.00542603	0.00213726	0.012	0.733333	0.00273559	0.00292433	0.35	0.739907	-0.0128517	0.00313858	5e-05	0.733333	0.00273559	0.00292433	0.000233353	vital capacity; red blood cell distribution width; erythrocyte count; body height; forced expiratory volume; BMI-adjusted waist circumference; hormone measurement, thyroxine measurement; atrial fibrillation; blood protein measurement	Kichaev G, Am J Hum Genet, 2018; Lango Allen H, Nature, 2010; Shrine N, Nat Genet, 2019; Wen W, Sci Rep, 2016; Porcu E, PLoS Genet, 2013; Okada Y, Hum Mol Genet, 2010; Nielsen JB, Nat Genet, 2018; Sun BB, Nature, 2018; Wain LV, Nat Genet, 2017; He M, Hum Mol Genet, 2014; Wood AR, Nat Genet, 2014; Emilsson V, Science, 2018	LHX3; QSOX2
234	139248574	9	9:139248574	G	A	0.96568	0.0105504	0.00515885	0.046	0.97018	0.0301092	0.00769354	8.1e-05	0.961142	-0.00330451	0.0070296	0.56	0.97018	0.0301092	0.00769354	0.0011661	type II diabetes mellitus; vital capacity; IGA glomerulonephritis; Crohn's disease; forced expiratory volume; ulcerative colitis; inflammatory bowel disease; CCL2 measurement; ankylosing spondylitis; ankylosing spondylitis, psoriasis, ulcerative colitis, Crohn's disease, sclerosing cholangitis; leukocyte count; granulocyte percentage of myeloid white cells; autoimmune thyroid disease, type I diab…	Kichaev G, Am J Hum Genet, 2018; Kiryluk K, Nat Genet, 2014; Franke A, Nat Genet, 2010; Shrine N, Nat Genet, 2019; Julia A, Gut, 2012; Mahajan A, Nat Genet, 2018; Imamura M, Nat Commun, 2016; McGovern DP, Nat Genet, 2010; Liu JZ, Nat Genet, 2015; Voruganti VS, Cytokine, 2012; Barrett JC, Nat Genet, 2009; Hara K, Hum Mol Genet, 2013; Comuzzie AG, PLoS One, 2012; Cortes A, Nat Genet, 2013; Ellingha…	GPSM1; DNLZ; CARD9; SNAPC4
235	139845678	9	rs13301993	T	A	0.766883	-0.00972	0.0022399	1.2e-05	0.771045	-0.00840733	0.00309696	0.0072	0.762688	-0.0112525	0.00325495	0.00035	0.771045	-0.00840733	0.00309696	0.5213	heel bone mineral density; renal system measurement; corneal topography; blood protein measurement; central corneal thickness	Morris JA, Nat Genet, 2018; Tin A, Nephrol Dial Transplant, 2013; Lu Y, Nat Genet, 2013; Sun BB, Nature, 2018; Emilsson V, Science, 2018; Iglesias AI, Nat Commun, 2018	TRAF2; RP11-229P13.2; RP11-229P13.25; FBXW5; C8G; LCN12; C9orf141; RP11-229P13.19
236	139845691	9	9:139845691	C	T	0.820886	-0.00992228	0.00248012	5.5e-05	0.823543	-0.00780413	0.00344052	0.025	0.818208	-0.0114833	0.0035919	0.00087	0.823543	-0.00780413	0.00344052	0.453768	heel bone mineral density; renal system measurement; corneal topography; blood protein measurement; central corneal thickness	Morris JA, Nat Genet, 2018; Tin A, Nephrol Dial Transplant, 2013; Lu Y, Nat Genet, 2013; Sun BB, Nature, 2018; Emilsson V, Science, 2018; Iglesias AI, Nat Commun, 2018	TRAF2; RP11-229P13.2; RP11-229P13.25; FBXW5; C8G; LCN12; C9orf141; RP11-229P13.19
237	139846002	9	rs12551078	T	C	0.821694	-0.00999175	0.00248619	5.1e-05	0.824407	-0.00815695	0.00345174	0.02	0.818958	-0.0112691	0.00359785	0.0011	0.824407	-0.00815695	0.00345174	0.527283	heel bone mineral density; renal system measurement; corneal topography; blood protein measurement; central corneal thickness	Morris JA, Nat Genet, 2018; Tin A, Nephrol Dial Transplant, 2013; Lu Y, Nat Genet, 2013; Sun BB, Nature, 2018; Emilsson V, Science, 2018; Iglesias AI, Nat Commun, 2018	TRAF2; RP11-229P13.2; RP11-229P13.25; FBXW5; C8G; LCN12; C9orf141; RP11-229P13.19
238	139846131	9	rs12551097	T	G	0.829184	-0.00979397	0.00252578	9.5e-05	0.831731	-0.0067866	0.00350786	0.056	0.826615	-0.0122986	0.00365392	0.00042	0.831731	-0.0067866	0.00350786	0.270418	heel bone mineral density; renal system measurement; corneal topography; blood protein measurement; central corneal thickness	Morris JA, Nat Genet, 2018; Tin A, Nephrol Dial Transplant, 2013; Lu Y, Nat Genet, 2013; Sun BB, Nature, 2018; Emilsson V, Science, 2018; Iglesias AI, Nat Commun, 2018	TRAF2; RP11-229P13.2; RP11-229P13.25; FBXW5; C8G; LCN12; C9orf141; RP11-229P13.19
239	139846292	9	rs13301994	A	G	0.82125	-0.0100646	0.00248045	4.3e-05	0.823934	-0.0080621	0.00344278	0.021	0.818545	-0.011535	0.00359055	0.00082	0.823934	-0.0080621	0.00344278	0.479527	heel bone mineral density; renal system measurement; corneal topography; blood protein measurement; central corneal thickness	Morris JA, Nat Genet, 2018; Tin A, Nephrol Dial Transplant, 2013; Lu Y, Nat Genet, 2013; Sun BB, Nature, 2018; Emilsson V, Science, 2018; Iglesias AI, Nat Commun, 2018	RP11-229P13.2; RP11-229P13.25; FBXW5; C8G; LCN12; C9orf141; RP11-229P13.19
240	139847089	9	rs13283724	G	C	0.818251	-0.00964307	0.0024666	8.1e-05	0.821518	-0.00752968	0.00343212	0.031	0.814958	-0.0113381	0.00356201	0.00092	0.821518	-0.00752968	0.00343212	0.435533	heel bone mineral density; renal system measurement; corneal topography; blood protein measurement; central corneal thickness	Morris JA, Nat Genet, 2018; Tin A, Nephrol Dial Transplant, 2013; Lu Y, Nat Genet, 2013; Sun BB, Nature, 2018; Emilsson V, Science, 2018; Iglesias AI, Nat Commun, 2018	RP11-229P13.2; RP11-229P13.25; FBXW5; C8G; LCN12; C9orf141; RP11-229P13.19; PTGDS
241	139854256	9	rs13294373	T	A	0.789033	-0.00943297	0.00234288	5.1e-05	0.793471	-0.00995037	0.00326607	0.0025	0.784559	-0.00915891	0.00337755	0.0054	0.793471	-0.00995037	0.00326607	0.864536	heel bone mineral density; renal system measurement; corneal topography; blood protein measurement; central corneal thickness	Morris JA, Nat Genet, 2018; Tin A, Nephrol Dial Transplant, 2013; Lu Y, Nat Genet, 2013; Sun BB, Nature, 2018; Emilsson V, Science, 2018; Iglesias AI, Nat Commun, 2018	RP11-229P13.2; RP11-229P13.25; FBXW5; C8G; LCN12; C9orf141; RP11-229P13.19; PTGDS; LCNL1
1	5417246	4	rs3821933	G	C	0.841953	-0.0112705	0.00261758	1.2e-05	0.841913	-0.00802077	0.00358372	0.025	0.841993	-0.016322	0.00384529	3e-05					susceptibility to mumps measurement; coronary artery calcification, type II diabetes mellitus; Alzheimer's disease biomarker measurement	Tian C, Nat Commun, 2017; Divers J, BMC Genet, 2017; Scelsi MA, Brain, 2018	STK32B; Y_RNA
2	5544825	4	rs114253635	A	T	0.971019	-0.00299422	0.00568147	0.6	0.969676	-0.0241748	0.00770387	0.0015	0.972373	0.01976	0.00843219	0.016	0.969676	-0.0241748	0.00770387	9.79558e-05	-	-	C4orf6; EVC2
3	5922917	4	rs10937692	C	T	0.977467	-0.0183393	0.00641006	0.0041	0.976981	-0.0373175	0.00872891	2e-05	0.977957	0.00167327	0.00946955	0.71	0.976981	-0.0373175	0.00872891	0.00216917	serum zinc measurement	Evans DM, Hum Mol Genet, 2013	MIR378D1
4	6921424	4	rs10937764	T	C	0.23693	-0.00342886	0.00223967	0.13	0.236216	0.00525549	0.00310699	0.095	0.237649	-0.0121301	0.003247	0.00018	0.236216	0.00525549	0.00310699	8.93016e-05	eosinophil count; mean platelet volume; monocyte percentage of leukocytes	Kichaev G, Am J Hum Genet, 2018; Astle WJ, Cell, 2016	TBC1D14
5	7255871	4	rs6813723	A	G	0.888444	-0.012681	0.00304689	3.3e-05	0.891686	-0.00944767	0.00423836	0.028	0.885176	-0.0147103	0.00440652	0.00056					systemic lupus erythematosus	Langefeld CD, Nat Commun, 2017	SORCS2
6	7256477	4	rs6836917	G	A	0.891221	-0.0126381	0.00305751	3.8e-05	0.894461	-0.00949464	0.00426094	0.028	0.887955	-0.0145055	0.00441412	0.00074					systemic lupus erythematosus	Langefeld CD, Nat Commun, 2017	SORCS2
7	7256887	4	rs112860127	C	T	0.897242	-0.0132955	0.00313197	2.3e-05	0.90024	-0.00873727	0.00435558	0.047	0.894219	-0.0163218	0.00453062	0.00025	0.90024	-0.00873727	0.00435558	0.221622	systemic lupus erythematosus	Langefeld CD, Nat Commun, 2017	SORCS2
8	7256984	4	rs78049473	G	A	0.88743	-0.0118355	0.00300686	8.9e-05	0.891875	-0.0087196	0.00420752	0.042	0.88295	-0.0136509	0.0043249	0.0011					systemic lupus erythematosus	Langefeld CD, Nat Commun, 2017	SORCS2
9	7257048	4	rs76941564	A	G	0.88743	-0.0118355	0.00300686	8.9e-05	0.891875	-0.0087196	0.00420752	0.042	0.88295	-0.0136509	0.0043249	0.0011					systemic lupus erythematosus	Langefeld CD, Nat Commun, 2017	SORCS2
10	7257081	4	rs78910918	C	T	0.88743	-0.0118355	0.00300686	8.9e-05	0.891875	-0.0087196	0.00420752	0.042	0.88295	-0.0136509	0.0043249	0.0011					systemic lupus erythematosus	Langefeld CD, Nat Commun, 2017	SORCS2
11	7812485	4	rs141263594	C	T	0.978487	-0.00632129	0.00645379	0.34	0.979296	-0.0319936	0.00904265	0.00042	0.977671	0.0180201	0.00926825	0.045	0.979296	-0.0319936	0.00904265	9.16248e-05	serum alanine aminotransferase measurement, alcohol consumption measurement; granulocyte colony-stimulating factor measurement	Whitfield JB, Alcohol Clin Exp Res, 2018; Ahola-Olli AV, Am J Hum Genet, 2016	AFAP1
12	7930175	4	rs146526156	C	A	0.950773	-0.0100048	0.00428556	0.023	0.951653	-0.0248947	0.00591943	3e-05	0.949886	0.00549484	0.0062398	0.33	0.951653	-0.0248947	0.00591943	0.000345719	systolic blood pressure; open-angle glaucoma; intraocular pressure measurement	Kichaev G, Am J Hum Genet, 2018; Choquet H, Nat Commun, 2018; Khawaja AP, Nat Genet, 2018	AFAP1; AC097381.1
13	7930209	4	rs140993725	G	A	0.950773	-0.0100048	0.00428556	0.023	0.951653	-0.0248947	0.00591943	3e-05	0.949886	0.00549484	0.0062398	0.33	0.951653	-0.0248947	0.00591943	0.000345719	systolic blood pressure; open-angle glaucoma; intraocular pressure measurement	Kichaev G, Am J Hum Genet, 2018; Choquet H, Nat Commun, 2018; Khawaja AP, Nat Genet, 2018	AFAP1; AC097381.1
14	8776349	4	rs188099596	C	T	0.984558	-0.000116981	0.00865634	0.96	0.985049	-0.0354382	0.0120322	0.0031	0.984063	0.0351104	0.0125261	0.0049	0.985049	-0.0354382	0.0120322	3.89479e-05	-	-	-
15	9074478	4	rs146261896	C	G	0.975481	-0.0308915	0.00765117	6.1e-05	0.974868	-0.0180517	0.0104841	0.091	0.9761	-0.0438301	0.0112305	0.0001	0.974868	-0.0180517	0.0104841	0.0892683	-	-	RP11-747H12.6; ENPP7P10
16	12669861	4	rs56116508	A	C	0.951333	-0.018722	0.00438606	2.3e-05	0.950385	-0.0129206	0.00599618	0.032	0.952289	-0.0244161	0.00645317	0.00019					-	-	-
17	12727857	4	rs114953832	A	T	0.98662	0.00594185	0.00838206	0.55	0.986513	-0.030283	0.0116261	0.0078	0.986727	0.0369805	0.0121539	0.0021	0.986513	-0.030283	0.0116261	5.11605e-05	-	-	-
18	12763878	4	rs114952774	C	T	0.988754	-0.0273152	0.00901353	0.0026	0.988027	-0.048497	0.0119202	4.5e-05	0.989487	-0.0037817	0.01376	0.81	0.988027	-0.048497	0.0119202	0.012874	word reading; response to mTOR inhibitor	Luciano M, Genes Brain Behav, 2013; Jiang J, Front Genet, 2013	-
19	12766407	4	rs114761373	T	C	0.98883	-0.0279174	0.00904739	0.0021	0.988096	-0.0494563	0.0119806	3.5e-05	0.98957	-0.0042577	0.0137903	0.78	0.988096	-0.0494563	0.0119806	0.0122267	word reading; response to mTOR inhibitor	Luciano M, Genes Brain Behav, 2013; Jiang J, Front Genet, 2013	-
20	17523833	4	rs79327764	C	A	0.828414	-0.00573078	0.00245576	0.019	0.829422	0.00295762	0.00339919	0.39	0.827398	-0.0146764	0.00356808	3.8e-05					blood protein measurement	Sun BB, Nature, 2018; Emilsson V, Science, 2018	QDPR; CLRN2; snoU13
21	19122442	4	rs10461114	G	A	0.980428	-0.0220386	0.00676484	0.00085	0.980823	-0.0382753	0.00933581	3.9e-05	0.980031	-0.00780947	0.00985802	0.52	0.980823	-0.0382753	0.00933581	0.0230543	schizophrenia	Goes FS, Am J Med Genet B Neuropsychiatr Genet, 2015	-
22	25360789	4	rs79546647	G	A	0.957746	-0.0152273	0.00468057	0.0013	0.957173	-0.0020295	0.00634669	0.73	0.958325	-0.0266852	0.00694585	8.8e-05					memory performance	Chung J, Alzheimers Dement, 2017	ZCCHC4; AC108218.1; ANAPC4
23	25361248	4	rs79618473	C	T	0.959628	-0.0149682	0.00478861	0.002	0.959652	-0.000336691	0.00654764	0.94	0.959603	-0.0272398	0.00704389	7.8e-05					memory performance	Chung J, Alzheimers Dement, 2017	ZCCHC4; AC108218.1; ANAPC4
24	25438361	4	rs143198617	G	A	0.975605	-0.0172959	0.00612408	0.0052	0.974691	5.50301e-05	0.00819025	1	0.976526	-0.0356403	0.00922773	9.9e-05	0.974691	5.50301e-05	0.00819025	0.00339217	parental longevity; rheumatoid arthritis	Pilling LC, Aging (Albany NY), 2016; Wellcome Trust Case Control Consortium, Nature, 2007	ANAPC4
25	28016800	4	rs16880101	G	A	0.761844	-0.00124393	0.00221407	0.57	0.75839	-0.00986824	0.00303638	0.0011	0.765327	0.00785599	0.00324735	0.014	0.75839	-0.00986824	0.00303638	5.40067e-05	smoking status measurement; adolescent idiopathic scoliosis	Liu M, Nat Genet, 2019; Liu J, Hum Genet, 2018	-
26	28101628	4	rs10007143	A	T	0.142041	0.00442978	0.00268202	0.092	0.142619	-0.00572018	0.00365796	0.12	0.141459	0.0162976	0.00395558	4.9e-05	0.142619	-0.00572018	0.00365796	3.49247e-05	smoking status measurement	Liu M, Nat Genet, 2019	-
27	29711788	4	rs10939273	A	G	0.696577	0.00151792	0.00205153	0.47	0.694379	0.00966955	0.00278005	0.00053	0.698792	-0.00690184	0.00304657	0.025	0.694379	0.00966955	0.00278005	4.72054e-05	alcohol consumption measurement	Liu M, Nat Genet, 2019	-
28	29712547	4	rs16882167	G	A	0.689533	0.00194852	0.00204838	0.35	0.686443	0.00983928	0.00277001	0.00042	0.692648	-0.00630172	0.00304887	0.042	0.686443	0.00983928	0.00277001	7.2413e-05	alcohol consumption measurement	Liu M, Nat Genet, 2019	-
29	29722997	4	rs12641943	G	C	0.696972	0.00137337	0.00204495	0.51	0.6939	0.00952712	0.00276663	0.00059	0.70007	-0.0072028	0.00304226	0.02	0.6939	0.00952712	0.00276663	3.78593e-05	smoking status measurement	Liu M, Nat Genet, 2019	-
30	30578175	4	rs13131444	G	A	0.640993	-0.00625835	0.00192287	0.00092	0.644083	-0.000762795	0.00263931	0.73	0.637878	-0.0114201	0.00281761	5.9e-05	0.644083	-0.000762795	0.00263931	0.00517941	self reported educational attainment	Lee JJ, Nat Genet, 2018	-
31	30737703	4	rs111733682	T	C	0.965749	-0.019114	0.00519062	0.00025	0.968717	-0.0313971	0.00743689	3.3e-05	0.962758	-0.009402	0.00730934	0.16	0.968717	-0.0313971	0.00743689	0.0326576	schizophrenia, response to antipsychotic drug; adolescent idiopathic scoliosis	Yu H, Lancet Psychiatry, 2018; Liu J, Hum Genet, 2018	PCDH7
32	30738200	4	4:30738200	G	C	0.451042	-0.00744046	0.0018765	7e-05	0.454668	-0.00457571	0.00258432	0.078	0.447386	-0.00957899	0.00274042	0.00028	0.454668	-0.00457571	0.00258432	0.178559	schizophrenia, response to antipsychotic drug; adolescent idiopathic scoliosis	Yu H, Lancet Psychiatry, 2018; Liu J, Hum Genet, 2018	PCDH7
33	31001716	4	rs114533869	A	G	0.958256	0.0189723	0.00487457	8.5e-05	0.955955	0.0158907	0.0065884	0.018	0.960576	0.0213099	0.00726106	0.002	0.955955	0.0158907	0.0065884	0.575652	-	-	PCDH7
34	31177908	4	rs1499464	C	G	0.558795	-0.00745862	0.00189087	7.8e-05	0.560093	-0.00722095	0.00258253	0.0052	0.557485	-0.00864536	0.00278471	0.0031	0.560093	-0.00722095	0.00258253	0.704072	smoking behavior; smoking status measurement; risk-taking behaviour; bulimia nervosa	Karlsson Linner R, Nat Genet, 2019; Kichaev G, Am J Hum Genet, 2018; Liu M, Nat Genet, 2019; Wade TD, Int J Eat Disord, 2013	RP11-617I14.1
35	33195210	4	rs7670699	A	G	0.0294401	0.0175407	0.00619893	0.0047	0.0328791	0.0358163	0.0080634	9.5e-06	0.025973	-0.00479308	0.00966924	0.48					Alzheimer's disease, age at onset	Kamboh MI, Mol Psychiatry, 2011	-
36	34063945	4	rs111302082	C	G	0.958164	-0.0154735	0.00474922	0.001	0.960522	-0.0297523	0.00667733	7.1e-06	0.955787	-0.00243988	0.00679987	0.72	0.960522	-0.0297523	0.00667733	0.00370219	-	-	RP11-79E3.3
37	34234144	4	rs187770489	T	A	0.958567	-0.0151475	0.0047576	0.0013	0.961065	-0.0294299	0.00668828	9.2e-06	0.956048	-0.00228007	0.00681291	0.73	0.961065	-0.0294299	0.00668828	0.00397583	-	-	RP11-548L20.1
38	34238382	4	rs75698427	G	T	0.949794	-0.0130939	0.00432004	0.0022	0.951621	-0.0270707	0.0060534	7e-06	0.947952	-0.00108996	0.00620404	0.87					-	-	RP11-548L20.1
39	34272385	4	rs115638871	G	T	0.951093	-0.012564	0.00436607	0.0037	0.951653	-0.026497	0.00603555	1e-05	0.950528	0.000330285	0.00635177	0.94	0.951653	-0.026497	0.00603555	0.00192976	-	-	RP11-548L20.1
40	34285350	4	rs138266973	G	A	0.95007	-0.0125397	0.00436836	0.0038	0.950505	-0.0261933	0.00604086	1.3e-05	0.949631	0.000233488	0.00635282	0.95	0.950505	-0.0261933	0.00604086	0.00226563	-	-	RP11-548L20.1
41	34305397	4	rs7656700	C	T	0.951758	-0.0130778	0.00441571	0.0029	0.952284	-0.0279569	0.00610158	4.2e-06	0.951227	0.000838831	0.00642668	0.87					-	-	-
42	34305626	4	rs9996067	T	G	0.928902	-0.00917766	0.00365875	0.013	0.930741	-0.0200368	0.0051122	9.7e-05	0.927048	0.00154344	0.00526828	0.85					-	-	-
43	35944165	4	rs11736705	T	C	0.744553	-0.00845399	0.00215814	7.5e-05	0.749558	-0.0106942	0.00298518	0.0004	0.739506	-0.0071508	0.00313856	0.025	0.749558	-0.0106942	0.00298518	0.407392	adolescent idiopathic scoliosis	Liu J, Hum Genet, 2018	ARAP2
44	35950909	4	rs73809923	C	A	0.72988	-0.00857539	0.00212347	4.5e-05	0.731567	-0.0101388	0.00294727	0.00064	0.72818	-0.00825746	0.00307708	0.0088					adolescent idiopathic scoliosis	Liu J, Hum Genet, 2018	ARAP2
45	35953402	4	rs73809925	G	A	0.733418	-0.00840707	0.00212898	6.6e-05	0.735535	-0.0101007	0.00295676	0.0007	0.731283	-0.00809798	0.00308327	0.011					adolescent idiopathic scoliosis	Liu J, Hum Genet, 2018	ARAP2
46	35953617	4	rs73809926	T	C	0.726935	-0.008894	0.00212211	2.2e-05	0.730406	-0.010834	0.00294541	0.00026	0.723436	-0.0082262	0.00307539	0.0086					adolescent idiopathic scoliosis	Liu J, Hum Genet, 2018	ARAP2
47	38738346	4	rs28435938	G	A	0.439755	-0.00553681	0.00188022	0.003	0.43657	-0.0106342	0.00260475	4.9e-05	0.442966	-0.00183399	0.00272977	0.54					allergy, asthma	Zhu Z, Nat Genet, 2018	RNA5SP158
48	38739435	4	rs7654519	A	C	0.428873	-0.00533104	0.00189271	0.0046	0.425719	-0.0110039	0.00263047	3.3e-05	0.432053	-0.001141	0.00273932	0.74					allergy, asthma; anti-topoisomerase-I-antibody-positive systemic scleroderma	Zhu Z, Nat Genet, 2018; Gorlova OY, PLoS One, 2018	RNA5SP158
49	38739436	4	rs7675778	G	A	0.428981	-0.00542565	0.00189341	0.0039	0.425833	-0.0110671	0.00263062	2.9e-05	0.432155	-0.00125649	0.00274117	0.71					allergy, asthma; anti-topoisomerase-I-antibody-positive systemic scleroderma	Zhu Z, Nat Genet, 2018; Gorlova OY, PLoS One, 2018	RNA5SP158
50	38741445	4	rs6842064	T	C	0.620915	-0.00275853	0.0019149	0.14	0.6162	-0.0105154	0.00264209	7.4e-05	0.625668	0.00382295	0.00279156	0.16					allergy, asthma; anti-topoisomerase-I-antibody-positive systemic scleroderma; endometrial carcinoma, endometriosis	Zhu Z, Nat Genet, 2018; Gorlova OY, PLoS One, 2018; Painter JN, Cancer Med, 2018	RNA5SP158
51	38743573	4	rs6851042	A	C	0.450086	-0.00539999	0.00188687	0.0041	0.448164	-0.0107004	0.00261096	4.6e-05	0.452022	-0.00119784	0.00274238	0.73					allergy, asthma; anti-topoisomerase-I-antibody-positive systemic scleroderma; endometrial carcinoma, endometriosis	Zhu Z, Nat Genet, 2018; Gorlova OY, PLoS One, 2018; Painter JN, Cancer Med, 2018	RNA5SP158
52	38744056	4	rs6531660	C	T	0.451048	-0.00536252	0.00188931	0.0044	0.449357	-0.0106941	0.00261434	4.8e-05	0.452754	-0.00100179	0.00274591	0.78					allergy, asthma; anti-topoisomerase-I-antibody-positive systemic scleroderma; endometrial carcinoma, endometriosis	Zhu Z, Nat Genet, 2018; Gorlova OY, PLoS One, 2018; Painter JN, Cancer Med, 2018	RNA5SP158
53	38745446	4	rs73140550	T	C	0.640464	-0.00275066	0.00194469	0.15	0.637938	-0.0104528	0.00267339	9.9e-05	0.643011	0.00429744	0.00284504	0.12					allergy, asthma; anti-topoisomerase-I-antibody-positive systemic scleroderma; endometrial carcinoma, endometriosis	Zhu Z, Nat Genet, 2018; Gorlova OY, PLoS One, 2018; Painter JN, Cancer Med, 2018	RNA5SP158
54	38747667	4	rs10012222	A	G	0.453056	-0.00508577	0.00188528	0.0069	0.450852	-0.0105947	0.00260882	5.5e-05	0.455279	-0.000509393	0.00274002	0.92	0.450852	-0.0105947	0.00260882	0.00693961	allergy, asthma; anti-topoisomerase-I-antibody-positive systemic scleroderma; endometrial carcinoma, endometriosis	Zhu Z, Nat Genet, 2018; Gorlova OY, PLoS One, 2018; Painter JN, Cancer Med, 2018	RNA5SP158
55	40344112	4	rs116144215	C	T	0.974154	0.00543553	0.00606374	0.35	0.97042	-0.0157859	0.00783258	0.044	0.977919	0.0319829	0.00954661	0.0006	0.97042	-0.0157859	0.00783258	8.97262e-05	DNA methylation	Zhang Q, Genome Med, 2018	AC195454.1; CHRNA9
56	40389969	4	rs140690207	G	A	0.983329	-0.00264891	0.00779927	0.74	0.982173	-0.0322194	0.0103411	0.0018	0.984495	0.0299362	0.011871	0.0095	0.982173	-0.0322194	0.0103411	6.38916e-05	longitudinal BMI measurement	Scannell Bryan M, PLoS One, 2014	RNU7-74P
57	40466674	4	rs606013	T	C	0.853864	-0.0122732	0.0028193	1.1e-05	0.853242	-0.0125233	0.00382231	0.00086	0.85449	-0.0120636	0.00418437	0.0044					parental longevity	Pilling LC, Aging (Albany NY), 2016	RBM47; AC098869.1
58	42330900	4	rs1386616	G	A	0.518834	-0.00330213	0.00188176	0.075	0.511784	-0.0102861	0.00258588	7.9e-05	0.525941	0.003578	0.00275502	0.15	0.511784	-0.0102861	0.00258588	0.000202398	-	-	RP11-63A11.1
59	42331464	4	rs748359	C	G	0.521463	-0.00304628	0.00186955	0.098	0.514698	-0.0103691	0.00256807	6.2e-05	0.528282	0.00414518	0.00273816	0.098					-	-	RP11-63A11.1
60	42331579	4	rs748360	T	C	0.521725	-0.00308076	0.00186522	0.094	0.514762	-0.0102188	0.0025623	7.7e-05	0.528746	0.00392858	0.00273167	0.12					-	-	RP11-63A11.1
61	42332083	4	rs750335	C	T	0.522666	-0.00321834	0.00186637	0.08	0.515948	-0.0103413	0.00256238	6.3e-05	0.529439	0.0037928	0.00273494	0.13					-	-	RP11-63A11.1
62	42334065	4	rs2632703	T	A	0.521805	-0.00306009	0.00186591	0.096	0.514957	-0.010171	0.00256307	8.3e-05	0.528708	0.00394609	0.00273285	0.11					-	-	RP11-63A11.1
63	42337423	4	rs3103194	G	C	0.521539	-0.0030655	0.0018673	0.096	0.514768	-0.0101635	0.00256371	8.5e-05	0.528364	0.00392527	0.00273624	0.12					-	-	RP11-63A11.1
64	42338548	4	rs1017936	C	T	0.521434	-0.00308828	0.00186925	0.093	0.514698	-0.0102066	0.00256717	8.1e-05	0.528224	0.0039184	0.00273824	0.12	0.514698	-0.0102066	0.00256717	0.000138302	-	-	RP11-63A11.1
65	42339033	4	rs1487611	C	T	0.520478	-0.00305048	0.00187132	0.097	0.513771	-0.0102685	0.00257102	7.5e-05	0.527239	0.0040267	0.00274017	0.11	0.513771	-0.0102685	0.00257102	0.000116697	-	-	RP11-63A11.1
66	54486856	4	rs144512754	A	T	0.987161	-0.0237685	0.00829126	0.0037	0.986708	-0.0428043	0.0111631	8.6e-05	0.987618	-0.00913652	0.0123996	0.55	0.986708	-0.0428043	0.0111631	0.0409961	facial hair thickness measurement; lobe attachment	Adhikari K, Nat Commun, 2016; Shaffer JR, Am J Hum Genet, 2017	FIP1L1; LNX1; LNX1-AS2
67	54486936	4	rs147781772	C	T	0.987161	-0.0237685	0.00829126	0.0037	0.986708	-0.0428043	0.0111631	8.6e-05	0.987618	-0.00913652	0.0123996	0.55	0.986708	-0.0428043	0.0111631	0.0409961	facial hair thickness measurement; lobe attachment	Adhikari K, Nat Commun, 2016; Shaffer JR, Am J Hum Genet, 2017	FIP1L1; LNX1; LNX1-AS2
68	54487185	4	rs79028487	T	C	0.982911	-0.0259799	0.00718578	0.00027	0.981731	-0.0503627	0.00948349	7.1e-08	0.984101	-0.00210828	0.0109976	0.96					facial hair thickness measurement; lobe attachment	Adhikari K, Nat Commun, 2016; Shaffer JR, Am J Hum Genet, 2017	FIP1L1; LNX1; LNX1-AS2
69	54488817	4	rs145752200	A	G	0.982943	-0.0259282	0.00719477	0.00029	0.981845	-0.0506785	0.00951672	6.5e-08	0.98405	-0.00183956	0.0109816	0.98	0.981845	-0.0506785	0.00951672	0.000665528	facial hair thickness measurement; lobe attachment	Adhikari K, Nat Commun, 2016; Shaffer JR, Am J Hum Genet, 2017	FIP1L1; LNX1; LNX1-AS2
70	54493393	4	rs55966837	C	G	0.963621	-0.0184064	0.0049946	0.00021	0.963765	-0.0286249	0.00684712	2.3e-05	0.963476	-0.010617	0.00732725	0.18					facial hair thickness measurement; lobe attachment	Adhikari K, Nat Commun, 2016; Shaffer JR, Am J Hum Genet, 2017	FIP1L1; LNX1; LNX1-AS2
71	54495071	4	rs139178248	T	A	0.982933	-0.0245885	0.00718024	0.00056	0.98199	-0.0503506	0.009573	9.4e-08	0.983885	-0.000202755	0.0108579	0.9	0.98199	-0.0503506	0.009573	0.000451052	facial hair thickness measurement; lobe attachment	Adhikari K, Nat Commun, 2016; Shaffer JR, Am J Hum Genet, 2017	FIP1L1; LNX1; LNX1-AS2
72	54508985	4	rs78315295	C	G	0.983019	-0.025095	0.00725486	0.00048	0.981838	-0.0494276	0.00958297	1.6e-07	0.984209	-0.00140296	0.0110918	0.99					hair colour measurement; facial hair thickness measurement; lobe attachment	Kichaev G, Am J Hum Genet, 2018; Adhikari K, Nat Commun, 2016; Shaffer JR, Am J Hum Genet, 2017	FIP1L1; LNX1; RP11-317M11.1
73	54511431	4	rs184055133	C	T	0.983326	-0.0241331	0.00733042	0.00088	0.982198	-0.0481039	0.00969057	4.5e-07	0.984463	-0.000955486	0.0111964	0.96	0.982198	-0.0481039	0.00969057	0.00126279	hair colour measurement; facial hair thickness measurement	Kichaev G, Am J Hum Genet, 2018; Adhikari K, Nat Commun, 2016	FIP1L1; LNX1; RP11-317M11.1
74	54514460	4	rs139688826	A	C	0.978123	-0.0129098	0.0064323	0.04	0.976609	-0.033121	0.0085456	7.3e-05	0.979649	0.00782733	0.00976793	0.36	0.976609	-0.033121	0.0085456	0.00139808	hair colour measurement; facial hair thickness measurement	Kichaev G, Am J Hum Genet, 2018; Adhikari K, Nat Commun, 2016	FIP1L1; LNX1; RP11-317M11.1
75	54515609	4	rs79117883	G	A	0.978468	-0.0131447	0.00646123	0.037	0.97717	-0.0341504	0.0086033	4.9e-05	0.979776	0.00808587	0.00978576	0.35					hair colour measurement; facial hair thickness measurement	Kichaev G, Am J Hum Genet, 2018; Adhikari K, Nat Commun, 2016	FIP1L1; LNX1; RP11-317M11.1
76	54519625	4	rs114902663	T	C	0.981641	-0.0250314	0.00695507	0.00028	0.979832	-0.0429841	0.00902715	1.1e-06	0.983465	-0.00760486	0.0108709	0.58	0.979832	-0.0429841	0.00902715	0.0112379	balding measurement; hair colour measurement; facial hair thickness measurement; dementia, Alzheimer's disease neuropathologic change	Kichaev G, Am J Hum Genet, 2018; Yap CX, Nat Commun, 2018; Adhikari K, Nat Commun, 2016; Beecham GW, PLoS Genet, 2014	FIP1L1; LNX1; RP11-317M11.1
77	54547187	4	rs74883422	T	C	0.968362	-0.0186615	0.00534929	0.00036	0.965777	-0.0270679	0.00705065	7.3e-05	0.970968	-0.0110524	0.0082022	0.22					balding measurement; hair colour measurement; dementia, Alzheimer's disease neuropathologic change	Kichaev G, Am J Hum Genet, 2018; Yap CX, Nat Commun, 2018; Beecham GW, PLoS Genet, 2014	FIP1L1; LNX1; RP11-317M11.1
78	54552428	4	rs114488350	A	G	0.969062	-0.0165731	0.00543527	0.0018	0.967872	-0.0298558	0.00732491	2.9e-05	0.970262	-0.00489259	0.00812037	0.57	0.967872	-0.0298558	0.00732491	0.0207953	balding measurement; dementia, Alzheimer's disease neuropathologic change	Kichaev G, Am J Hum Genet, 2018; Yap CX, Nat Commun, 2018; Beecham GW, PLoS Genet, 2014	FIP1L1; LNX1; RP11-317M11.1
79	54764716	4	rs12510885	C	T	0.919809	-0.0115905	0.00345777	0.00085	0.920079	-0.0191317	0.00474228	7.2e-05	0.919537	-0.00403446	0.00507048	0.48	0.920079	-0.0191317	0.00474228	0.0276432	-	-	FIP1L1; RP11-89B16.1
80	54770411	4	rs11133295	T	C	0.915879	-0.0107537	0.00337405	0.0015	0.916591	-0.019539	0.00463884	3.3e-05	0.915162	-0.00191904	0.00493543	0.77	0.916591	-0.019539	0.00463884	0.00842463	asthma	Almoguera B, Am J Respir Crit Care Med, 2016	FIP1L1; RP11-89B16.1; RP11-89B16.2
81	54774314	4	rs12641510	C	T	0.916342	-0.0110959	0.00338835	0.0011	0.917121	-0.0199724	0.00465506	2.3e-05	0.915556	-0.00219632	0.00496005	0.73	0.917121	-0.0199724	0.00465506	0.00813176	diastolic blood pressure; pulse pressure measurement; asthma; pulse pressure measurement, alcohol drinking; pulse pressure measurement, alcohol consumption measurement	Hoffmann TJ, Nat Genet, 2016; Almoguera B, Am J Respir Crit Care Med, 2016; Wain LV, Hypertension, 2017; Feitosa MF, PLoS One, 2018; Wain LV, Nat Genet, 2011; Kanai M, Nat Genet, 2018	FIP1L1; RP11-89B16.1; RP11-89B16.2
82	56499267	4	rs1906674	A	G	0.0624367	-0.00472272	0.0038237	0.22	0.0626293	0.0107659	0.00526865	0.038	0.0622424	-0.0192722	0.00558068	0.00046	0.0626293	0.0107659	0.00526865	7.37748e-05	BMI-adjusted waist-hip ratio; BMI-adjusted waist-hip ratio, sex interaction measurement; BMI-adjusted waist-hip ratio, sex interaction measurement, age at assessment	Winkler TW, PLoS Genet, 2015; Shungin D, Nature, 2015	NMU
83	57461423	4	rs143638693	G	A	0.849952	0.00120098	0.00277867	0.68	0.851874	0.0125078	0.00387537	0.0016	0.848016	-0.00979219	0.00400792	0.017	0.851874	0.0125078	0.00387537	5.10027e-05	visceral:total adipose tissue ratio	Cha EDK, J Obes, 2018	THEGL; GLDCP1
84	57606621	4	rs62309921	C	A	0.911388	0.00741857	0.00325579	0.02	0.912314	0.018445	0.00451127	5.1e-05	0.910455	-0.00226317	0.00472567	0.59					blood protein measurement	Sun BB, Nature, 2018	RP11-533F5.2
85	58078129	4	rs10018570	G	T	0.721067	-0.00481084	0.00210723	0.022	0.717146	-0.011853	0.0029023	4.6e-05	0.725019	0.00139509	0.0030773	0.7	0.717146	-0.011853	0.0029023	0.00151468	-	-	IGFBP7-AS1
102	71088277	15	rs150840489	G	A	0.975874	-0.0190407	0.00629008	0.0019	0.975139	-0.0510393	0.00862355	2.4e-09	0.976615	0.0118823	0.00920658	0.17	0.975139	-0.0510393	0.00862355	4.38119e-07	insulin measurement	Strawbridge RJ, Diabetes, 2011	RP11-138H8.3; RP11-138H8.4; RPL29P30
69	17276223	1	rs11585710	C	T	0.614327	-0.00234413	0.00192536	0.21	0.616578	0.00748947	0.00263431	0.0049	0.612058	-0.0116906	0.00282084	2.7e-05	0.616578	0.00748947	0.00263431	4.83516e-07	erythrocyte count	Kichaev G, Am J Hum Genet, 2018	CROCC; MFAP2
88	58102424	4	rs10022815	C	T	0.889533	0.0105415	0.00311483	0.00078	0.887156	0.0180982	0.00424451	1.9e-05	0.89193	0.0010942	0.00459872	0.8	0.887156	0.0180982	0.00424451	0.00592857	-	-	-
89	58105688	4	rs7694552	C	T	0.258931	-0.00732241	0.00210525	0.00048	0.264825	-0.0114478	0.00289168	5.9e-05	0.252989	-0.00276737	0.00308349	0.31					-	-	-
90	58106366	4	rs4865205	T	C	0.257205	-0.0071155	0.00213118	0.00083	0.262434	-0.0115643	0.00293093	6.2e-05	0.251933	-0.002237	0.00311735	0.41					mosquito bite reaction itch intensity measurement, mosquito bite reaction size measurement	Jones AV, Hum Mol Genet, 2017	-
91	58112847	4	rs113147089	C	A	0.903455	0.0108458	0.00328672	0.0011	0.901337	0.0173839	0.00444295	9.7e-05	0.90559	0.00197098	0.00489411	0.65	0.901337	0.0173839	0.00444295	0.0182059	mosquito bite reaction itch intensity measurement, mosquito bite reaction size measurement	Jones AV, Hum Mol Genet, 2017	-
92	60055307	4	rs76396944	A	G	0.961179	-0.0148423	0.0047816	0.0025	0.962131	-0.00190496	0.00671304	0.83	0.96022	-0.026181	0.00685394	6.6e-05					-	-	RP11-622J8.1
93	60059524	4	rs79758620	A	G	0.960825	-0.014614	0.00476474	0.0028	0.961885	-0.0017568	0.00668826	0.84	0.959756	-0.0259652	0.00683088	7.2e-05					-	-	RP11-622J8.1
94	60732443	4	rs73194678	G	C	0.960815	-0.0164627	0.00486286	0.00076	0.961696	-0.0277716	0.00676256	3.7e-05	0.959927	-0.00650143	0.00703349	0.33					phospholipid measurement; reaction time measurement	Gieger C, PLoS Genet, 2008; Davies G, Nat Commun, 2018	-
95	62179060	4	rs112722642	C	T	0.970098	-0.00769406	0.00544476	0.16	0.971341	-0.0312777	0.0076097	4.5e-05	0.968844	0.0140839	0.00783807	0.097	0.971341	-0.0312777	0.0076097	2.60696e-05	response to bronchodilator, chronic obstructive pulmonary disease, FEV/FEC ratio; susceptibility to measles measurement	Lutz SM, BMC Genet, 2015; Tian C, Nat Commun, 2017	LPHN3
96	62216552	4	rs189908074	C	A	0.989213	-0.0132082	0.00921678	0.16	0.988651	-0.0454786	0.0122004	0.0002	0.98978	0.026723	0.0140541	0.064	0.988651	-0.0454786	0.0122004	8.54484e-05	-	-	LPHN3
97	62216560	4	rs182222590	C	A	0.989213	-0.0132082	0.00921678	0.16	0.988651	-0.0454786	0.0122004	0.0002	0.98978	0.026723	0.0140541	0.064	0.988651	-0.0454786	0.0122004	8.54484e-05	-	-	LPHN3
98	66353297	4	rs116251636	T	G	0.986233	-0.0346638	0.00803129	1.3e-05	0.987352	-0.033431	0.0114054	0.0028	0.985106	-0.0413089	0.0113939	0.00039	0.987352	-0.033431	0.0114054	0.620671	-	-	EPHA5
99	66625296	4	rs192080146	C	G	0.9821	0.00547973	0.00753545	0.45	0.981239	0.0344276	0.0101016	0.00063	0.982969	-0.0242657	0.0113245	0.039	0.981239	0.0344276	0.0101016	8.97341e-05	-	-	-
100	67601720	4	rs116767424	C	T	0.921839	0.0151502	0.00350469	1.3e-05	0.916477	0.0167011	0.00472837	0.00038	0.927245	0.0136895	0.00523367	0.01	0.916477	0.0167011	0.00472837	0.665447	response to cisplatin	Wheeler HE, Pharmacogenomics J, 2011	-
101	68430302	4	rs185493466	A	G	0.988938	0.0355462	0.00904845	8e-05	0.988222	0.0378491	0.0120474	0.0017	0.989659	0.0361507	0.0137044	0.0074	0.988222	0.0378491	0.0120474	0.924904	Parkinson's disease	Fung HC, Lancet Neurol, 2006	CENPC; STAP1
102	68465789	4	rs143835108	G	A	0.980359	0.0275645	0.00688311	5.3e-05	0.980633	0.0239386	0.00959659	0.014	0.980081	0.0318279	0.00993069	0.00082	0.980633	0.0239386	0.00959659	0.562878	Parkinson's disease	Fung HC, Lancet Neurol, 2006	STAP1; UBA6
103	68889120	4	rs184338588	C	T	0.984574	0.00466086	0.00795746	0.56	0.983497	0.0331328	0.010708	0.002	0.985659	-0.0310371	0.0119089	0.0071	0.983497	0.0331328	0.010708	4.95515e-05	-	-	UBA6-AS1; TMPRSS11GP; RNU6-95P; GCOM2
104	68985663	4	rs148557059	G	C	0.980976	0.000487359	0.00757693	0.96	0.979756	0.0281476	0.0103243	0.007	0.982206	-0.0331484	0.0111881	0.0026	0.979756	0.0281476	0.0103243	4.55053e-05	influenza A (H1N1); eye morphology measurement	Garcia-Etxebarria K, PLoS One, 2015; Lee MK, PLoS One, 2017	TMPRSS11F
105	72713546	4	rs13150628	A	G	0.34468	0.00765196	0.00194891	5.7e-05	0.345344	0.00802182	0.00266086	0.002	0.344009	0.00748925	0.00287123	0.01	0.345344	0.00802182	0.00266086	0.890414	coronary artery calcification; vitamin D measurement	Inouye M, PLoS Genet, 2012; Manousaki D, Am J Hum Genet, 2017; Hong J, J Clin Endocrinol Metab, 2018	RP11-545L5.1
106	72722492	4	rs1520505	G	T	0.342298	0.00758418	0.00195478	7e-05	0.343534	0.0078814	0.00267143	0.0024	0.341052	0.0076092	0.00287704	0.0094	0.343534	0.0078814	0.00267143	0.944023	coronary artery calcification; vitamin D measurement	Inouye M, PLoS Genet, 2012; Hong J, J Clin Endocrinol Metab, 2018; Manousaki D, Am J Hum Genet, 2017	-
107	73922782	4	rs144891720	G	A	0.982496	-0.030496	0.00727018	2.9e-05	0.981498	-0.0202159	0.00962861	0.032	0.983503	-0.0407191	0.0110798	0.00021	0.981498	-0.0202159	0.00962861	0.157233	-	-	RP11-352E8.2; COX18; ANKRD17
108	73931714	4	rs76352631	T	C	0.981844	-0.029209	0.00705091	3.7e-05	0.980488	-0.0217745	0.00931559	0.018	0.98321	-0.0374148	0.0107777	0.00048					-	-	RP11-352E8.2; COX18; ANKRD17
109	73935636	4	rs116008138	G	C	0.982658	-0.0307685	0.0072815	2.5e-05	0.98158	-0.0206129	0.00962348	0.029	0.983745	-0.0411424	0.0111249	0.00019	0.98158	-0.0206129	0.00962348	0.157572	-	-	RP11-352E8.2; COX18; ANKRD17
110	73948589	4	rs77695448	G	A	0.982141	-0.0315111	0.007256	1.5e-05	0.980886	-0.0214282	0.00959325	0.023	0.983408	-0.0417235	0.0110817	0.00014					smooth surface dental caries	Zeng Z, Caries Res, 2014	COX18; ANKRD17; HMGA1P2
111	73950909	4	rs115181919	G	C	0.982224	-0.0316752	0.00726214	1.4e-05	0.980987	-0.0217466	0.00960504	0.021	0.983471	-0.04175	0.011086	0.00014	0.980987	-0.0217466	0.00960504	0.16729	smooth surface dental caries	Zeng Z, Caries Res, 2014	COX18; ANKRD17; HMGA1P2
112	73952953	4	rs138364076	C	T	0.982224	-0.0316752	0.00726214	1.4e-05	0.980987	-0.0217466	0.00960504	0.021	0.983471	-0.04175	0.011086	0.00014	0.980987	-0.0217466	0.00960504	0.16729	smooth surface dental caries	Zeng Z, Caries Res, 2014	COX18; ANKRD17; HMGA1P2
113	73974725	4	rs1913150	A	G	0.0285502	0.0233893	0.0056477	3.5e-05	0.0308352	0.016083	0.00742507	0.029	0.0262465	0.0300615	0.00868599	0.0005	0.0308352	0.016083	0.00742507	0.215452	smooth surface dental caries	Zeng Z, Caries Res, 2014	ANKRD17; HMGA1P2
114	74033464	4	rs115685631	C	T	0.97493	-0.0259827	0.00596694	1.3e-05	0.973448	-0.0208642	0.00793002	0.0073	0.976425	-0.0290953	0.00905731	0.00099	0.973448	-0.0208642	0.00793002	0.488686	quality of life during menstruation measurement, breast pressure measurement; esterified cholesterol measurement; low density lipoprotein cholesterol measurement; total cholesterol measurement; free cholesterol measurement, low density lipoprotein cholesterol measurement; esterified cholesterol measurement, low density lipoprotein cholesterol measurement	Hirata T, Sci Rep, 2018; Davis JP, PLoS Genet, 2017	ANKRD17
115	74042354	4	rs111963738	C	T	0.974924	-0.02597	0.00596594	1.3e-05	0.973417	-0.0208669	0.007928	0.0073	0.976444	-0.0290813	0.00905676	0.001	0.973417	-0.0208669	0.007928	0.489505	quality of life during menstruation measurement, breast pressure measurement; esterified cholesterol measurement; low density lipoprotein cholesterol measurement; total cholesterol measurement; free cholesterol measurement, low density lipoprotein cholesterol measurement; esterified cholesterol measurement, low density lipoprotein cholesterol measurement	Hirata T, Sci Rep, 2018; Davis JP, PLoS Genet, 2017	ANKRD17
116	74052544	4	rs78204020	C	T	0.974899	-0.0260015	0.00596174	1.2e-05	0.973398	-0.0210345	0.00792455	0.0068	0.976412	-0.0289819	0.00904754	0.001					quality of life during menstruation measurement, breast pressure measurement; esterified cholesterol measurement; low density lipoprotein cholesterol measurement; total cholesterol measurement; free cholesterol measurement, low density lipoprotein cholesterol measurement; esterified cholesterol measurement, low density lipoprotein cholesterol measurement	Hirata T, Sci Rep, 2018; Davis JP, PLoS Genet, 2017	ANKRD17
117	74071150	4	rs147896963	A	G	0.980587	-0.0289367	0.00694453	3.1e-05	0.979302	-0.023186	0.00918827	0.01	0.981881	-0.0345681	0.0105966	0.00093	0.979302	-0.023186	0.00918827	0.411194	quality of life during menstruation measurement, breast pressure measurement	Hirata T, Sci Rep, 2018	ANKRD17
118	74082012	4	rs141114648	T	C	0.980568	-0.0290061	0.00693105	2.8e-05	0.979283	-0.023412	0.00917157	0.0094	0.981862	-0.0345463	0.0105745	0.00092	0.979283	-0.023412	0.00917157	0.420536	-	-	ANKRD17
119	74091982	4	rs186349991	G	A	0.980308	-0.0288631	0.00687198	2.6e-05	0.979069	-0.0233542	0.00911121	0.009	0.981557	-0.0346396	0.0104599	0.0008	0.979069	-0.0233542	0.00911121	0.410025	-	-	ANKRD17
120	74092291	4	rs370617875	T	C	0.980308	-0.0288631	0.00687198	2.6e-05	0.979069	-0.0233542	0.00911121	0.009	0.981557	-0.0346396	0.0104599	0.0008					-	-	ANKRD17
121	74102227	4	rs75836857	C	T	0.980384	-0.0284331	0.00688682	3.6e-05	0.979037	-0.0228144	0.00911753	0.011	0.981741	-0.0338743	0.010501	0.0011					-	-	ANKRD17; RP11-692D12.1
122	74105691	4	rs76584949	C	T	0.980349	-0.0283442	0.00688648	3.8e-05	0.978999	-0.0226487	0.00911695	0.011	0.981709	-0.0338919	0.0105007	0.0011					-	-	ANKRD17; RP11-692D12.1; SNORA3
123	74112211	4	rs114340307	G	A	0.980454	-0.0284418	0.00689168	3.7e-05	0.979113	-0.0227816	0.00912245	0.011	0.981805	-0.0339869	0.0105105	0.001	0.979113	-0.0227816	0.00912245	0.41489	-	-	ANKRD17; RP11-692D12.1; SNORA3
124	74112232	4	rs140448764	C	A	0.980454	-0.0284418	0.00689168	3.7e-05	0.979113	-0.0227816	0.00912245	0.011	0.981805	-0.0339869	0.0105105	0.001	0.979113	-0.0227816	0.00912245	0.41489	-	-	ANKRD17; RP11-692D12.1; SNORA3
125	74848201	4	rs73824586	T	C	0.9769	-0.0136993	0.00634419	0.03	0.976287	0.0111719	0.008586	0.19	0.977518	-0.0437757	0.00943423	5e-06					blood metabolite measurement, protein measurement, amino acid measurement; ulcerative colitis; coronary artery calcification; C-X-C motif chemokine 5 measurement; growth-regulated alpha protein measurement; inflammatory bowel disease; blood protein measurement	Kettunen J, Nat Commun, 2016; Liu JZ, Nat Genet, 2015; Inouye M, PLoS Genet, 2012; Suhre K, Nat Commun, 2017; Ahola-Olli AV, Am J Hum Genet, 2016; Jostins L, Nature, 2012; Emilsson V, Science, 2018	PF4; PPBP; CXCL5
126	74848244	4	rs73824587	T	C	0.976846	-0.0136242	0.0063436	0.031	0.976249	0.0111681	0.00858391	0.19	0.977448	-0.0436636	0.00943486	5.3e-06					blood metabolite measurement, protein measurement, amino acid measurement; ulcerative colitis; coronary artery calcification; C-X-C motif chemokine 5 measurement; growth-regulated alpha protein measurement; inflammatory bowel disease; blood protein measurement	Kettunen J, Nat Commun, 2016; Liu JZ, Nat Genet, 2015; Inouye M, PLoS Genet, 2012; Suhre K, Nat Commun, 2017; Ahola-Olli AV, Am J Hum Genet, 2016; Jostins L, Nature, 2012; Emilsson V, Science, 2018	PF4; PPBP; CXCL5
127	74852581	4	rs73824590	A	G	0.96928	-0.0123831	0.00541742	0.021	0.968584	0.00600721	0.00742582	0.41	0.969982	-0.0347852	0.00794882	1.9e-05					blood metabolite measurement, protein measurement, amino acid measurement; ulcerative colitis; coronary artery calcification; C-X-C motif chemokine 5 measurement; growth-regulated alpha protein measurement; urate measurement, body mass index; inflammatory bowel disease; blood protein measurement	Kettunen J, Nat Commun, 2016; Liu JZ, Nat Genet, 2015; Inouye M, PLoS Genet, 2012; Suhre K, Nat Commun, 2017; Ahola-Olli AV, Am J Hum Genet, 2016; Huffman JE, PLoS One, 2015; Jostins L, Nature, 2012; Emilsson V, Science, 2018	PF4; PPBP; CXCL5; RN7SL218P
128	74857802	4	rs73824600	T	G	0.961328	-0.0127639	0.00487532	0.0085	0.961191	0.00247295	0.00672992	0.69	0.961467	-0.0303515	0.00710259	2.7e-05					blood metabolite measurement, protein measurement, amino acid measurement; ulcerative colitis; coronary artery calcification; C-X-C motif chemokine 5 measurement; growth-regulated alpha protein measurement; urate measurement, body mass index; inflammatory bowel disease; blood protein measurement	Kettunen J, Nat Commun, 2016; Liu JZ, Nat Genet, 2015; Inouye M, PLoS Genet, 2012; Suhre K, Nat Commun, 2017; Ahola-Olli AV, Am J Hum Genet, 2016; Huffman JE, PLoS One, 2015; Jostins L, Nature, 2012; Emilsson V, Science, 2018	PF4; PPBP; CXCL5; RN7SL218P
129	74857940	4	rs73824601	T	C	0.963263	-0.0124099	0.00492644	0.011	0.962655	0.00173381	0.00676617	0.78	0.963877	-0.029131	0.00721379	8e-05					blood metabolite measurement, protein measurement, amino acid measurement; ulcerative colitis; coronary artery calcification; C-X-C motif chemokine 5 measurement; growth-regulated alpha protein measurement; urate measurement, body mass index; inflammatory bowel disease; blood protein measurement	Kettunen J, Nat Commun, 2016; Liu JZ, Nat Genet, 2015; Inouye M, PLoS Genet, 2012; Suhre K, Nat Commun, 2017; Ahola-Olli AV, Am J Hum Genet, 2016; Huffman JE, PLoS One, 2015; Jostins L, Nature, 2012; Emilsson V, Science, 2018	PF4; PPBP; CXCL5; RN7SL218P
130	75383494	4	4:75383494	C	T	0.654329	-0.00409921	0.00196699	0.039	0.64935	0.00309129	0.00270432	0.26	0.659349	-0.0115249	0.00287785	8.4e-05	0.64935	0.00309129	0.00270432	0.000178012	-	-	-
131	77002572	4	rs7662679	A	G	0.6764	0.00776483	0.0019834	9.3e-05	0.667928	0.00981692	0.0027224	0.00032	0.68494	0.00570958	0.00290797	0.036					hippocampal volume; mean corpuscular hemoglobin; blood protein measurement; monokine induced by gamma interferon measurement	Chung J, Alzheimers Dement, 2017; Kichaev G, Am J Hum Genet, 2018; Sun BB, Nature, 2018; Ahola-Olli AV, Am J Hum Genet, 2016; Emilsson V, Science, 2018	ART3; AC112719.1
132	77002589	4	rs7683914	G	A	0.676739	0.00778165	0.00198492	9.1e-05	0.668219	0.0098392	0.00272365	0.00031	0.685328	0.0057216	0.00291113	0.035					hippocampal volume; mean corpuscular hemoglobin; blood protein measurement; monokine induced by gamma interferon measurement	Chung J, Alzheimers Dement, 2017; Kichaev G, Am J Hum Genet, 2018; Sun BB, Nature, 2018; Ahola-Olli AV, Am J Hum Genet, 2016; Emilsson V, Science, 2018	ART3; AC112719.1
133	77004178	4	rs4274876	G	A	0.335039	-0.0078079	0.00196497	7.3e-05	0.343938	-0.0101354	0.00270353	0.00017	0.326068	-0.00544457	0.00287416	0.039					hippocampal volume; body mass index; mean corpuscular hemoglobin; blood protein measurement; monokine induced by gamma interferon measurement	Chung J, Alzheimers Dement, 2017; Kichaev G, Am J Hum Genet, 2018; Sun BB, Nature, 2018; Ahola-Olli AV, Am J Hum Genet, 2016; Emilsson V, Science, 2018	ART3; AC112719.1
134	77006805	4	rs6847950	G	A	0.484441	0.00760036	0.0018653	4.9e-05	0.477025	0.00852542	0.00258484	0.00097	0.491917	0.00608621	0.00270828	0.017					hippocampal volume; body mass index; mean corpuscular hemoglobin; blood protein measurement; monokine induced by gamma interferon measurement	Chung J, Alzheimers Dement, 2017; Kichaev G, Am J Hum Genet, 2018; Sun BB, Nature, 2018; Ahola-Olli AV, Am J Hum Genet, 2016; Emilsson V, Science, 2018	ART3; AC112719.1
135	77006977	4	rs6849653	C	T	0.676973	0.00778286	0.00198748	9.3e-05	0.668755	0.00986416	0.0027271	0.0003	0.685258	0.00568025	0.00291484	0.037					hippocampal volume; body mass index; mean corpuscular hemoglobin; blood protein measurement; monokine induced by gamma interferon measurement	Chung J, Alzheimers Dement, 2017; Kichaev G, Am J Hum Genet, 2018; Sun BB, Nature, 2018; Ahola-Olli AV, Am J Hum Genet, 2016; Emilsson V, Science, 2018	ART3; AC112719.1
136	77007122	4	rs78423393	G	A	0.676542	0.0078152	0.00198688	8.6e-05	0.668275	0.00993095	0.00272662	0.00027	0.684877	0.00570335	0.00291361	0.036					hippocampal volume; body mass index; mean corpuscular hemoglobin; blood protein measurement; monokine induced by gamma interferon measurement	Chung J, Alzheimers Dement, 2017; Kichaev G, Am J Hum Genet, 2018; Sun BB, Nature, 2018; Ahola-Olli AV, Am J Hum Genet, 2016; Emilsson V, Science, 2018	ART3; AC112719.1
137	77010790	4	rs6828078	C	A	0.676498	0.00790505	0.00198855	7.1e-05	0.668105	0.0101534	0.00272763	0.0002	0.684959	0.00562553	0.0029175	0.039					hippocampal volume; body mass index; mean corpuscular hemoglobin; blood protein measurement; monokine induced by gamma interferon measurement	Chung J, Alzheimers Dement, 2017; Kichaev G, Am J Hum Genet, 2018; Sun BB, Nature, 2018; Ahola-Olli AV, Am J Hum Genet, 2016; Emilsson V, Science, 2018	ART3; AC112719.1; NUP54
138	77015259	4	rs6856609	C	A	0.59479	-0.00773503	0.00191279	5.7e-05	0.605356	-0.0100676	0.0026504	0.00015	0.584139	-0.00486567	0.00277889	0.06					hippocampal volume; body mass index; mean corpuscular hemoglobin; blood protein measurement; monokine induced by gamma interferon measurement	Chung J, Alzheimers Dement, 2017; Kichaev G, Am J Hum Genet, 2018; Sun BB, Nature, 2018; Ahola-Olli AV, Am J Hum Genet, 2016; Emilsson V, Science, 2018	ART3; AC112719.1; NUP54
139	77025136	4	rs11097233	C	T	0.811483	-0.00699957	0.00238494	0.0039	0.81579	-0.0137876	0.00330283	3.5e-05	0.807142	5.35331e-05	0.00346426	0.91	0.81579	-0.0137876	0.00330283	0.00340436	hippocampal volume; body mass index; mean corpuscular hemoglobin; blood protein measurement	Chung J, Alzheimers Dement, 2017; Kichaev G, Am J Hum Genet, 2018; Sun BB, Nature, 2018; Emilsson V, Science, 2018	ART3; AC112719.1; NUP54
140	77030958	4	rs4379080	A	G	0.453842	0.00792003	0.0018896	2.9e-05	0.44407	0.00815773	0.00261531	0.0019	0.463692	0.00724205	0.00274782	0.007					hippocampal volume; body mass index; mean corpuscular hemoglobin; blood protein measurement	Chung J, Alzheimers Dement, 2017; Kichaev G, Am J Hum Genet, 2018; Sun BB, Nature, 2018	ART3; AC112719.1; NUP54
141	77572087	4	rs113829189	G	T	0.919097	0.0130597	0.00343055	7.8e-05	0.918875	0.0134198	0.00474164	0.0045	0.919321	0.0146107	0.0049914	0.0028	0.918875	0.0134198	0.00474164	0.860932	interleukin 10 measurement; C-X-C motif chemokine 10 measurement; cleft palate, cleft lip	Ahola-Olli AV, Am J Hum Genet, 2016; Leslie EJ, Hum Genet, 2017	SHROOM3; AC107072.2
142	78335404	4	rs1031080	A	T	0.87906	0.00353823	0.00290953	0.23	0.874836	-0.00721996	0.00392008	0.06	0.883318	0.0157727	0.00434923	0.00028	0.874836	-0.00721996	0.00392008	6.98488e-05	FEV/FEC ratio; smoking behavior, 3-hydroxypropylmercapturic acid measurement	Ong BA, PLoS One, 2013; Park SL, PLoS One, 2015	CCNG2; RP11-625I7.1
143	78335406	4	rs1031081	T	C	0.87906	0.00353823	0.00290953	0.23	0.874836	-0.00721996	0.00392008	0.06	0.883318	0.0157727	0.00434923	0.00028	0.874836	-0.00721996	0.00392008	6.98488e-05	FEV/FEC ratio; smoking behavior, 3-hydroxypropylmercapturic acid measurement	Ong BA, PLoS One, 2013; Park SL, PLoS One, 2015	CCNG2; RP11-625I7.1
144	78335569	4	rs11931577	T	C	0.878325	0.00351703	0.00287712	0.23	0.874211	-0.00741066	0.00388275	0.051	0.882473	0.015875	0.00429296	0.00021	0.874211	-0.00741066	0.00388275	4.62201e-05	FEV/FEC ratio; smoking behavior, 3-hydroxypropylmercapturic acid measurement	Ong BA, PLoS One, 2013; Park SL, PLoS One, 2015	CCNG2; RP11-625I7.1
145	78335597	4	rs11934887	G	A	0.881087	0.00351164	0.00290951	0.24	0.877504	-0.00795368	0.00392666	0.038	0.884699	0.0163585	0.00434074	0.00016	0.877504	-0.00795368	0.00392666	2.59468e-05	FEV/FEC ratio; smoking behavior, 3-hydroxypropylmercapturic acid measurement	Ong BA, PLoS One, 2013; Park SL, PLoS One, 2015	CCNG2; RP11-625I7.1
146	78336028	4	rs77464071	T	C	0.868254	0.00474336	0.00279324	0.095	0.865216	-0.00610365	0.0037875	0.099	0.871318	0.0167992	0.0041458	5.3e-05					FEV/FEC ratio; smoking behavior, 3-hydroxypropylmercapturic acid measurement	Ong BA, PLoS One, 2013; Park SL, PLoS One, 2015	CCNG2; RP11-625I7.1
147	78337309	4	rs11934190	T	G	0.867412	0.00401975	0.0027872	0.16	0.864137	-0.00714076	0.00378003	0.053	0.870714	0.016106	0.00413609	9.9e-05	0.864137	-0.00714076	0.00378003	2.65014e-05	FEV/FEC ratio; smoking behavior, 3-hydroxypropylmercapturic acid measurement	Ong BA, PLoS One, 2013; Park SL, PLoS One, 2015	CCNG2; RP11-625I7.1
148	78342325	4	rs2083701	T	G	0.876694	0.00387499	0.00286519	0.18	0.872212	-0.0068686	0.00385789	0.068	0.881213	0.0162088	0.00428609	0.00014	0.872212	-0.0068686	0.00385789	5.06232e-05	FEV/FEC ratio; smoking behavior, 3-hydroxypropylmercapturic acid measurement	Ong BA, PLoS One, 2013; Park SL, PLoS One, 2015	CCNG2; RP11-625I7.1
149	78344229	4	rs17002675	G	T	0.877211	0.00418204	0.00287538	0.15	0.873272	-0.00716824	0.00387518	0.058	0.881182	0.0170691	0.00429659	6.9e-05	0.873272	-0.00716824	0.00387518	2.21347e-05	FEV/FEC ratio; smoking behavior, 3-hydroxypropylmercapturic acid measurement	Ong BA, PLoS One, 2013; Park SL, PLoS One, 2015	CCNG2; RP11-625I7.1
150	78349083	4	rs11936117	C	G	0.876374	0.00438886	0.00286359	0.13	0.872117	-0.00696637	0.00385833	0.065	0.880666	0.017295	0.00428036	5.1e-05	0.872117	-0.00696637	0.00385833	2.01167e-05	FEV/FEC ratio; smoking behavior, 3-hydroxypropylmercapturic acid measurement	Ong BA, PLoS One, 2013; Park SL, PLoS One, 2015	CCNG2; RP11-625I7.1
151	78737585	4	rs116233753	C	T	0.986509	-0.0343664	0.00807367	2.1e-05	0.986879	-0.0490706	0.0113685	1.7e-05	0.986136	-0.0219341	0.0115408	0.063	0.986879	-0.0490706	0.0113685	0.0897889	-	-	CNOT6L
152	84783305	4	rs142265182	G	A	0.964502	-0.0205708	0.00517945	6.5e-05	0.963273	-0.0203805	0.00701694	0.0035	0.96574	-0.0210131	0.00769408	0.0054	0.963273	-0.0203805	0.00701694	0.950943	-	-	RP11-8L2.1
153	84791687	4	rs7656042	G	A	0.865312	0.0106488	0.00276136	9.3e-05	0.866509	0.00996153	0.00378415	0.0082	0.864106	0.0105683	0.00405264	0.0078					-	-	RP11-8L2.1
154	86681704	4	rs79282441	G	T	0.968273	0.0226885	0.00558792	4.1e-05	0.9676	0.0235452	0.0076679	0.002	0.968952	0.0253756	0.00818983	0.0016					PR interval; breast carcinoma; PR segment; QT interval; response to diisocyanate, asthma	Seyerle AA, Heart, 2017; van Setten J, Eur J Hum Genet, 2019; Michailidou K, Nature, 2017; Butler AM, Circ Cardiovasc Genet, 2012; Verweij N, Circ Cardiovasc Genet, 2014; Mendez-Giraldez R, Sci Rep, 2017; van Setten J, Nat Commun, 2018; Yucesoy B, Toxicol Sci, 2015	ARHGAP24
155	88502767	4	rs10222996	A	G	0.665718	-0.00116718	0.00200015	0.56	0.6608	0.00670394	0.0027597	0.019	0.670675	-0.00972511	0.00291593	0.0016	0.6608	0.00670394	0.0027597	3.40823e-05	SPARC-like protein 1 measurement; idiopathic dilated cardiomyopathy	Suhre K, Nat Commun, 2017; Xu H, J Pers Med, 2018	RP11-742B18.1
156	89275123	4	rs79519708	A	C	0.984843	-0.0312458	0.00793183	8.2e-05	0.984172	-0.0354438	0.0106966	0.00084	0.985519	-0.0271645	0.0118411	0.033					-	-	RP11-10L7.1; Y_RNA; HERC6
157	89885086	4	rs2013701	G	T	0.504013	-0.00864623	0.00183783	2.4e-06	0.503917	-0.0117127	0.0025313	2.6e-06	0.504108	-0.00504743	0.00268341	0.08	0.503917	-0.0117127	0.0025313	0.0672687	FEV/FEC ratio; vital capacity; ; blood pressure, chronic obstructive pulmonary disease; hair colour measurement; response to bronchodilator, FEV/FEC ratio; forced expiratory volume, response to bronchodilator; chronic obstructive pulmonary disease; chronic obstructive pulmonary disease, chronic bronchitis; pulmonary function measurement, smoking behaviour measurement, FEV/FEC ratio; pulmonary fun…	Kichaev G, Am J Hum Genet, 2018; Shrine N, Nat Genet, 2019; Zhu Z, Respir Res, 2019; Adhikari K, Nat Commun, 2016; Lutz SM, BMC Genet, 2015; Lee JH, Am J Respir Cell Mol Biol, 2015; Lee JH, Respir Res, 2014; Hancock DB, PLoS Genet, 2012; Cho MH, Lancet Respir Med, 2014; Hancock DB, Nat Genet, 2009; Cho MH, Nat Genet, 2010; Hobbs BD, Nat Genet, 2017; Wain LV, Nat Genet, 2017; Cho MH, Hum Mol Genet…	FAM13A
158	90669755	4	rs141536574	C	T	0.983164	0.00745727	0.00780667	0.35	0.981554	-0.0221002	0.0102492	0.033	0.984788	0.0393162	0.0120267	0.00088	0.981554	-0.0221002	0.0102492	8.29354e-05	Parkinson's disease	Simon-Sanchez J, Nat Genet, 2009; Edwards TL, Ann Hum Genet, 2010	RP11-115D19.1; SNCA
159	91714942	4	rs11941951	G	A	0.545737	0.00242841	0.00185822	0.17	0.541149	0.00943062	0.00255968	0.00023	0.550363	-0.00490415	0.00271331	0.067	0.541149	0.00943062	0.00255968	9.94392e-05	self reported educational attainment; seasonal gut microbiome measurement	Lee JJ, Nat Genet, 2018; Davenport ER, PLoS One, 2015	CCSER1
160	91715008	4	rs11932857	A	G	0.546364	0.00268837	0.00185031	0.13	0.541887	0.00967685	0.00254788	0.00014	0.550878	-0.0046303	0.00270271	0.083	0.541887	0.00967685	0.00254788	9.58014e-05	self reported educational attainment; seasonal gut microbiome measurement	Lee JJ, Nat Genet, 2018; Davenport ER, PLoS One, 2015	CCSER1
161	91719185	4	rs60209368	C	G	0.525035	0.00272506	0.00185499	0.13	0.521991	0.0105207	0.00255757	3.7e-05	0.528104	-0.00516385	0.00270587	0.049					self reported educational attainment; seasonal gut microbiome measurement	Lee JJ, Nat Genet, 2018; Davenport ER, PLoS One, 2015	CCSER1
70	17276357	1	rs11586910	T	C	0.614327	-0.00234413	0.00192536	0.21	0.616578	0.00748947	0.00263431	0.0049	0.612058	-0.0116906	0.00282084	2.7e-05	0.616578	0.00748947	0.00263431	4.83516e-07	erythrocyte count	Kichaev G, Am J Hum Genet, 2018	CROCC; MFAP2
163	91721548	4	rs11097266	A	G	0.599101	0.00210133	0.00189465	0.25	0.592569	0.0101957	0.00261076	9.1e-05	0.605686	-0.00616705	0.00276607	0.023	0.592569	0.0101957	0.00261076	1.31979e-05	self reported educational attainment; seasonal gut microbiome measurement	Lee JJ, Nat Genet, 2018; Davenport ER, PLoS One, 2015	CCSER1
164	91721573	4	rs11097267	T	A	0.601735	0.00241881	0.00190007	0.19	0.59542	0.0105836	0.00261883	5.2e-05	0.608102	-0.00590465	0.00277327	0.03	0.59542	0.0105836	0.00261883	1.19876e-05	self reported educational attainment; seasonal gut microbiome measurement	Lee JJ, Nat Genet, 2018; Davenport ER, PLoS One, 2015	CCSER1
165	91721940	4	rs2123961	G	A	0.602575	0.00245493	0.00190083	0.18	0.596783	0.0105756	0.00261861	5.2e-05	0.608414	-0.00589605	0.00277559	0.03	0.596783	0.0105756	0.00261861	1.23315e-05	self reported educational attainment; seasonal gut microbiome measurement	Lee JJ, Nat Genet, 2018; Davenport ER, PLoS One, 2015	CCSER1
166	91722073	4	rs11944234	G	A	0.601989	0.00246353	0.00189884	0.18	0.596013	0.010615	0.00261605	4.8e-05	0.608013	-0.0058914	0.00277256	0.03	0.596013	0.010615	0.00261605	1.15763e-05	self reported educational attainment; seasonal gut microbiome measurement	Lee JJ, Nat Genet, 2018; Davenport ER, PLoS One, 2015	CCSER1
167	91722239	4	rs1377918	G	A	0.601992	0.00245646	0.00189902	0.18	0.596045	0.0106055	0.00261633	4.9e-05	0.607988	-0.00589429	0.00277278	0.03	0.596045	0.0106055	0.00261633	1.16918e-05	self reported educational attainment; seasonal gut microbiome measurement	Lee JJ, Nat Genet, 2018; Davenport ER, PLoS One, 2015	CCSER1
168	91722525	4	rs1377919	T	A	0.602207	0.00247777	0.00189994	0.18	0.596347	0.0106564	0.00261831	4.5e-05	0.608115	-0.00589603	0.00277334	0.03	0.596347	0.0106564	0.00261831	1.10668e-05	self reported educational attainment; seasonal gut microbiome measurement	Lee JJ, Nat Genet, 2018; Davenport ER, PLoS One, 2015	CCSER1
169	91722561	4	rs1377921	G	A	0.602214	0.00243938	0.00189991	0.18	0.596329	0.0106078	0.00261761	4.9e-05	0.608147	-0.00593025	0.002774	0.029	0.596329	0.0106078	0.00261761	1.1263e-05	self reported educational attainment; seasonal gut microbiome measurement	Lee JJ, Nat Genet, 2018; Davenport ER, PLoS One, 2015	CCSER1
170	91722766	4	rs11945420	C	G	0.602606	0.00245769	0.00189776	0.18	0.596745	0.0106186	0.00261497	4.7e-05	0.608516	-0.00591902	0.00277049	0.029	0.596745	0.0106186	0.00261497	1.10109e-05	self reported educational attainment; seasonal gut microbiome measurement	Lee JJ, Nat Genet, 2018; Davenport ER, PLoS One, 2015	CCSER1
171	91723078	4	rs7668936	G	A	0.607322	0.00222871	0.00190502	0.23	0.60159	0.010345	0.00262549	7.9e-05	0.613101	-0.00613231	0.00278051	0.025					self reported educational attainment; seasonal gut microbiome measurement	Lee JJ, Nat Genet, 2018; Davenport ER, PLoS One, 2015	CCSER1
172	91724446	4	rs1840307	A	G	0.601998	0.00254971	0.00189624	0.17	0.596442	0.0107016	0.00261319	4.1e-05	0.6076	-0.00578393	0.00276788	0.033	0.596442	0.0107016	0.00261319	1.15428e-05	self reported educational attainment; seasonal gut microbiome measurement	Lee JJ, Nat Genet, 2018; Davenport ER, PLoS One, 2015	CCSER1
173	91724547	4	rs1840308	G	A	0.602087	0.00255563	0.00189666	0.17	0.596549	0.0107052	0.00261391	4e-05	0.60767	-0.00577314	0.00276832	0.033	0.596549	0.0107052	0.00261391	1.16949e-05	self reported educational attainment; seasonal gut microbiome measurement	Lee JJ, Nat Genet, 2018; Davenport ER, PLoS One, 2015	CCSER1
174	91724592	4	rs1840309	G	T	0.602087	0.00255563	0.00189666	0.17	0.596549	0.0107052	0.00261391	4e-05	0.60767	-0.00577314	0.00276832	0.033	0.596549	0.0107052	0.00261391	1.16949e-05	self reported educational attainment; seasonal gut microbiome measurement	Lee JJ, Nat Genet, 2018; Davenport ER, PLoS One, 2015	CCSER1
175	91724608	4	rs77617028	T	C	0.602081	0.00255727	0.0018966	0.17	0.596511	0.0107074	0.00261371	4e-05	0.607695	-0.00577151	0.00276838	0.033					self reported educational attainment; seasonal gut microbiome measurement	Lee JJ, Nat Genet, 2018; Davenport ER, PLoS One, 2015	CCSER1
176	91724830	4	rs4496548	T	C	0.601998	0.00254971	0.00189624	0.17	0.596442	0.0107016	0.00261319	4.1e-05	0.6076	-0.00578393	0.00276788	0.033					self reported educational attainment; seasonal gut microbiome measurement	Lee JJ, Nat Genet, 2018; Davenport ER, PLoS One, 2015	CCSER1
177	91725080	4	rs62314107	T	C	0.601998	0.00254971	0.00189624	0.17	0.596442	0.0107016	0.00261319	4.1e-05	0.6076	-0.00578393	0.00276788	0.033					self reported educational attainment; seasonal gut microbiome measurement	Lee JJ, Nat Genet, 2018; Davenport ER, PLoS One, 2015	CCSER1
178	91725242	4	rs111500722	T	C	0.601998	0.00254971	0.00189624	0.17	0.596442	0.0107016	0.00261319	4.1e-05	0.6076	-0.00578393	0.00276788	0.033	0.596442	0.0107016	0.00261319	1.15428e-05	self reported educational attainment; seasonal gut microbiome measurement	Lee JJ, Nat Genet, 2018; Davenport ER, PLoS One, 2015	CCSER1
179	91725407	4	rs11732715	C	A	0.601998	0.00254971	0.00189624	0.17	0.596442	0.0107016	0.00261319	4.1e-05	0.6076	-0.00578393	0.00276788	0.033	0.596442	0.0107016	0.00261319	1.15428e-05	self reported educational attainment; seasonal gut microbiome measurement	Lee JJ, Nat Genet, 2018; Davenport ER, PLoS One, 2015	CCSER1
180	91725867	4	rs10516878	A	G	0.60228	0.0025501	0.0018961	0.17	0.596814	0.0107139	0.00261531	4e-05	0.607791	-0.00577823	0.00276519	0.033	0.596814	0.0107139	0.00261531	1.14195e-05	self reported educational attainment; seasonal gut microbiome measurement	Lee JJ, Nat Genet, 2018; Davenport ER, PLoS One, 2015	CCSER1
181	91725945	4	rs13122202	C	T	0.602147	0.00254064	0.00189586	0.17	0.596657	0.0107021	0.00261482	4.1e-05	0.607683	-0.00578244	0.00276502	0.033	0.596657	0.0107021	0.00261482	1.14979e-05	self reported educational attainment; seasonal gut microbiome measurement	Lee JJ, Nat Genet, 2018; Davenport ER, PLoS One, 2015	CCSER1
182	91725979	4	rs11942486	G	A	0.602147	0.00254064	0.00189586	0.17	0.596657	0.0107021	0.00261482	4.1e-05	0.607683	-0.00578244	0.00276502	0.033	0.596657	0.0107021	0.00261482	1.14979e-05	self reported educational attainment; seasonal gut microbiome measurement	Lee JJ, Nat Genet, 2018; Davenport ER, PLoS One, 2015	CCSER1
183	91726360	4	rs11934481	A	C	0.60223	0.00256314	0.00189417	0.16	0.596896	0.0107091	0.00261284	4e-05	0.607606	-0.0057195	0.00276214	0.034	0.596896	0.0107091	0.00261284	1.20887e-05	self reported educational attainment; seasonal gut microbiome measurement	Lee JJ, Nat Genet, 2018; Davenport ER, PLoS One, 2015	CCSER1
184	91726636	4	rs6815961	C	A	0.602252	0.00255436	0.00189461	0.17	0.596953	0.0106957	0.00261381	4.1e-05	0.607593	-0.00571975	0.00276239	0.034					self reported educational attainment; seasonal gut microbiome measurement	Lee JJ, Nat Genet, 2018; Davenport ER, PLoS One, 2015	CCSER1
185	91726854	4	rs6841940	T	C	0.602065	0.00256888	0.00189449	0.16	0.596751	0.0106821	0.00261327	4.2e-05	0.607422	-0.00568776	0.00276261	0.035					self reported educational attainment; seasonal gut microbiome measurement	Lee JJ, Nat Genet, 2018; Davenport ER, PLoS One, 2015	CCSER1
186	91727148	4	rs6532246	A	T	0.602078	0.00256782	0.00189439	0.16	0.596764	0.0106801	0.00261309	4.2e-05	0.607434	-0.00568787	0.0027625	0.035					self reported educational attainment; seasonal gut microbiome measurement	Lee JJ, Nat Genet, 2018; Davenport ER, PLoS One, 2015	CCSER1
187	91727206	4	rs6532247	C	T	0.602249	0.00256552	0.0018953	0.16	0.596972	0.0106789	0.00261454	4.2e-05	0.607568	-0.00568449	0.00276362	0.036					self reported educational attainment; seasonal gut microbiome measurement	Lee JJ, Nat Genet, 2018; Davenport ER, PLoS One, 2015	CCSER1
188	91727222	4	rs6532248	T	C	0.602138	0.00257529	0.00189467	0.16	0.596821	0.0106899	0.0026134	4.1e-05	0.607498	-0.00568332	0.002763	0.036					self reported educational attainment; seasonal gut microbiome measurement	Lee JJ, Nat Genet, 2018; Davenport ER, PLoS One, 2015	CCSER1
189	91727562	4	rs6822836	G	A	0.602331	0.00253843	0.00189509	0.17	0.596966	0.0107386	0.00261369	3.8e-05	0.60774	-0.00579171	0.00276395	0.032					self reported educational attainment; seasonal gut microbiome measurement	Lee JJ, Nat Genet, 2018; Davenport ER, PLoS One, 2015	CCSER1
190	91727572	4	rs6532249	A	T	0.602078	0.00252819	0.00189487	0.17	0.596644	0.0106833	0.00261257	4.1e-05	0.607555	-0.00575992	0.00276449	0.033					self reported educational attainment; seasonal gut microbiome measurement	Lee JJ, Nat Genet, 2018; Davenport ER, PLoS One, 2015	CCSER1
191	91727798	4	rs6822907	A	C	0.601232	0.00250518	0.00189523	0.17	0.595666	0.0106033	0.00261279	4.7e-05	0.606843	-0.00575537	0.00276534	0.034					self reported educational attainment; seasonal gut microbiome measurement	Lee JJ, Nat Genet, 2018; Davenport ER, PLoS One, 2015	CCSER1
192	91727801	4	rs7666587	G	A	0.601229	0.00250569	0.0018952	0.17	0.595666	0.0106033	0.00261279	4.7e-05	0.606837	-0.00575467	0.00276526	0.034					self reported educational attainment; seasonal gut microbiome measurement	Lee JJ, Nat Genet, 2018; Davenport ER, PLoS One, 2015	CCSER1
193	91727860	4	rs7666611	G	C	0.601976	0.00255291	0.00189395	0.17	0.596575	0.0106539	0.00261173	4.3e-05	0.607422	-0.00568772	0.00276268	0.035					self reported educational attainment; seasonal gut microbiome measurement	Lee JJ, Nat Genet, 2018; Davenport ER, PLoS One, 2015	CCSER1
194	91727951	4	rs7666834	G	A	0.602112	0.00252202	0.00189473	0.17	0.596675	0.0106813	0.00261244	4.1e-05	0.607593	-0.00576861	0.00276424	0.033					self reported educational attainment; seasonal gut microbiome measurement	Lee JJ, Nat Genet, 2018; Davenport ER, PLoS One, 2015	CCSER1
195	91728453	4	4:91728453	T	C	0.602233	0.00256264	0.0018942	0.16	0.596896	0.0107091	0.00261284	4e-05	0.607613	-0.0057202	0.00276223	0.034	0.596896	0.0107091	0.00261284	1.20826e-05	seasonal gut microbiome measurement	Davenport ER, PLoS One, 2015	CCSER1
196	91728684	4	rs11932854	T	C	0.601302	0.00262538	0.00189629	0.15	0.595761	0.0108041	0.00261673	3.5e-05	0.606888	-0.00566279	0.00276426	0.036	0.595761	0.0108041	0.00261673	1.17958e-05	seasonal gut microbiome measurement	Davenport ER, PLoS One, 2015	CCSER1
197	91728833	4	rs1377922	C	T	0.602274	0.0025524	0.00189448	0.17	0.596978	0.0106933	0.0026136	4.1e-05	0.607613	-0.00572053	0.00276223	0.034	0.596978	0.0106933	0.0026136	1.23468e-05	seasonal gut microbiome measurement	Davenport ER, PLoS One, 2015	CCSER1
198	91729172	4	rs4561896	T	C	0.602372	0.00255319	0.00189495	0.17	0.597067	0.0106936	0.00261411	4.1e-05	0.607721	-0.00572726	0.00276306	0.034					seasonal gut microbiome measurement	Davenport ER, PLoS One, 2015	CCSER1
199	91729499	4	rs7678591	A	G	0.60223	0.00256314	0.00189417	0.16	0.596896	0.0107091	0.00261284	4e-05	0.607606	-0.0057195	0.00276214	0.034					seasonal gut microbiome measurement	Davenport ER, PLoS One, 2015	CCSER1
200	91729809	4	rs7679671	G	C	0.60223	0.00256314	0.00189417	0.16	0.596896	0.0107091	0.00261284	4e-05	0.607606	-0.0057195	0.00276214	0.034					seasonal gut microbiome measurement	Davenport ER, PLoS One, 2015	CCSER1
201	91729979	4	rs62314127	T	C	0.60223	0.00256314	0.00189417	0.16	0.596896	0.0107091	0.00261284	4e-05	0.607606	-0.0057195	0.00276214	0.034					seasonal gut microbiome measurement	Davenport ER, PLoS One, 2015	CCSER1
202	91730196	4	rs59753408	C	T	0.60235	0.00262135	0.00189561	0.16	0.597004	0.010791	0.00261476	3.5e-05	0.60774	-0.00570172	0.00276432	0.035					seasonal gut microbiome measurement	Davenport ER, PLoS One, 2015	CCSER1
203	91730612	4	rs11097270	T	C	0.602223	0.00256144	0.00189421	0.16	0.596896	0.0107091	0.00261284	4e-05	0.607593	-0.00572431	0.00276225	0.034	0.596896	0.0107091	0.00261284	1.2023e-05	seasonal gut microbiome measurement	Davenport ER, PLoS One, 2015	CCSER1
204	91730747	4	rs6843367	A	G	0.60223	0.00256314	0.00189417	0.16	0.596896	0.0107091	0.00261284	4e-05	0.607606	-0.0057195	0.00276214	0.034					seasonal gut microbiome measurement	Davenport ER, PLoS One, 2015	CCSER1
205	91731078	4	rs6821319	T	C	0.60223	0.00256314	0.00189417	0.16	0.596896	0.0107091	0.00261284	4e-05	0.607606	-0.0057195	0.00276214	0.034					seasonal gut microbiome measurement	Davenport ER, PLoS One, 2015	CCSER1
206	91731278	4	rs6844459	A	G	0.60223	0.00256314	0.00189417	0.16	0.596896	0.0107091	0.00261284	4e-05	0.607606	-0.0057195	0.00276214	0.034					seasonal gut microbiome measurement	Davenport ER, PLoS One, 2015	CCSER1
207	91731349	4	rs6849905	G	C	0.602198	0.00256518	0.00189434	0.16	0.596865	0.0107036	0.00261304	4e-05	0.607574	-0.00571204	0.00276242	0.035					seasonal gut microbiome measurement	Davenport ER, PLoS One, 2015	CCSER1
208	91731392	4	rs6849567	C	T	0.602154	0.00254843	0.00189447	0.17	0.596808	0.0106824	0.00261305	4.2e-05	0.607543	-0.00572897	0.00276281	0.034					seasonal gut microbiome measurement	Davenport ER, PLoS One, 2015	CCSER1
209	91731394	4	rs6849395	A	G	0.602154	0.00254843	0.00189447	0.17	0.596808	0.0106824	0.00261305	4.2e-05	0.607543	-0.00572897	0.00276281	0.034					seasonal gut microbiome measurement	Davenport ER, PLoS One, 2015	CCSER1
210	91731521	4	rs59998165	A	G	0.602584	0.00253356	0.00189601	0.17	0.59725	0.0106827	0.00261549	4.2e-05	0.607962	-0.0057534	0.0027647	0.033					seasonal gut microbiome measurement	Davenport ER, PLoS One, 2015	CCSER1
211	91731731	4	rs61407958	T	G	0.602059	0.00255351	0.00189484	0.17	0.596713	0.010692	0.00261364	4.1e-05	0.607447	-0.00573463	0.00276324	0.034					seasonal gut microbiome measurement	Davenport ER, PLoS One, 2015	CCSER1
212	91732495	4	rs17017628	T	A	0.624078	0.00222149	0.0019188	0.23	0.621158	0.00982567	0.00264344	0.00018	0.627022	-0.00546589	0.00280118	0.044	0.621158	0.00982567	0.00264344	5.79824e-05	seasonal gut microbiome measurement	Davenport ER, PLoS One, 2015	CCSER1
213	91732715	4	rs17017632	G	A	0.624078	0.00222149	0.0019188	0.23	0.621158	0.00982567	0.00264344	0.00018	0.627022	-0.00546589	0.00280118	0.044	0.621158	0.00982567	0.00264344	5.79824e-05	seasonal gut microbiome measurement	Davenport ER, PLoS One, 2015	CCSER1
214	91734742	4	4:91734742	T	C	0.624072	0.00219911	0.00191963	0.24	0.621146	0.00983032	0.00264482	0.00018	0.627022	-0.0055113	0.00280213	0.042	0.621146	0.00983032	0.00264482	5.52281e-05	seasonal gut microbiome measurement	Davenport ER, PLoS One, 2015	CCSER1; TMSB4XP8
215	91735204	4	4:91735204	T	C	0.625827	0.00226396	0.00192092	0.22	0.622622	0.00969375	0.00264401	0.00022	0.629057	-0.00522055	0.00280682	0.053	0.622622	0.00969375	0.00264401	8.9621e-05	seasonal gut microbiome measurement	Davenport ER, PLoS One, 2015	CCSER1; TMSB4XP8
216	91735277	4	rs1823882	C	T	0.624078	0.00222149	0.0019188	0.23	0.621158	0.00982567	0.00264344	0.00018	0.627022	-0.00546589	0.00280118	0.044	0.621158	0.00982567	0.00264344	5.79824e-05	seasonal gut microbiome measurement	Davenport ER, PLoS One, 2015	CCSER1; TMSB4XP8
217	91735548	4	rs1823881	G	T	0.626397	0.00213032	0.00192156	0.25	0.623265	0.00968462	0.00264711	0.00023	0.629554	-0.00545539	0.00280536	0.044	0.623265	0.00968462	0.00264711	7.02943e-05	seasonal gut microbiome measurement	Davenport ER, PLoS One, 2015	CCSER1; TMSB4XP8
218	91736546	4	rs17017638	T	C	0.624078	0.00222149	0.0019188	0.23	0.621158	0.00982567	0.00264344	0.00018	0.627022	-0.00546589	0.00280118	0.044	0.621158	0.00982567	0.00264344	5.79824e-05	seasonal gut microbiome measurement	Davenport ER, PLoS One, 2015	CCSER1; TMSB4XP8
219	91737022	4	rs17187511	C	T	0.62309	0.00217088	0.00192055	0.24	0.620098	0.00986307	0.00264484	0.00018	0.626107	-0.00562019	0.00280481	0.039	0.620098	0.00986307	0.00264484	4.7525e-05	seasonal gut microbiome measurement	Davenport ER, PLoS One, 2015	CCSER1; TMSB4XP8
220	91737057	4	rs17017644	G	A	0.62309	0.00217088	0.00192055	0.24	0.620098	0.00986307	0.00264484	0.00018	0.626107	-0.00562019	0.00280481	0.039	0.620098	0.00986307	0.00264484	4.7525e-05	seasonal gut microbiome measurement	Davenport ER, PLoS One, 2015	CCSER1; TMSB4XP8
221	91737150	4	rs17017647	C	T	0.624183	0.00221984	0.00191911	0.23	0.621221	0.00983834	0.0026438	0.00018	0.627169	-0.00547886	0.00280171	0.043	0.621221	0.00983834	0.0026438	5.65038e-05	seasonal gut microbiome measurement	Davenport ER, PLoS One, 2015	CCSER1; TMSB4XP8
222	91737500	4	rs17017652	C	A	0.624462	0.00223088	0.00191784	0.23	0.621751	0.00984198	0.00264134	0.00018	0.627194	-0.00544594	0.00280056	0.044	0.621751	0.00984198	0.00264134	5.77326e-05	seasonal gut microbiome measurement	Davenport ER, PLoS One, 2015	CCSER1; TMSB4XP8
223	91737693	4	rs17017655	A	G	0.624462	0.00223088	0.00191784	0.23	0.621751	0.00984198	0.00264134	0.00018	0.627194	-0.00544594	0.00280056	0.044	0.621751	0.00984198	0.00264134	5.77326e-05	seasonal gut microbiome measurement	Davenport ER, PLoS One, 2015	CCSER1; TMSB4XP8
224	91737787	4	rs17017663	T	C	0.623423	0.00214095	0.00191857	0.25	0.620691	0.00966278	0.00264359	0.00023	0.626177	-0.00541703	0.0028003	0.045	0.620691	0.00966278	0.00264359	7.31656e-05	seasonal gut microbiome measurement	Davenport ER, PLoS One, 2015	CCSER1; TMSB4XP8
225	91737835	4	rs17017669	A	T	0.623423	0.00214095	0.00191857	0.25	0.620691	0.00966278	0.00264359	0.00023	0.626177	-0.00541703	0.0028003	0.045	0.620691	0.00966278	0.00264359	7.31656e-05	seasonal gut microbiome measurement	Davenport ER, PLoS One, 2015	CCSER1; TMSB4XP8
226	91738858	4	rs17017681	G	A	0.624398	0.00222084	0.00191869	0.23	0.621524	0.00986942	0.00264294	0.00017	0.627296	-0.00551638	0.00280136	0.042	0.621524	0.00986942	0.00264294	5.21276e-05	seasonal gut microbiome measurement	Davenport ER, PLoS One, 2015	CCSER1; TMSB4XP8
227	91738978	4	rs17017683	C	T	0.624424	0.00221477	0.00191856	0.23	0.621556	0.00986192	0.00264268	0.00017	0.627315	-0.00552345	0.00280128	0.041	0.621556	0.00986192	0.00264268	5.20975e-05	seasonal gut microbiome measurement	Davenport ER, PLoS One, 2015	CCSER1; TMSB4XP8
33	17754454	11	rs150481830	T	C	0.463665	0.00219013	0.00211281	0.34	0.458321	0.0117183	0.00293006	7.7e-05	0.469054	-0.00932764	0.00306117	0.0033	0.458321	0.0117183	0.00293006	4.90393e-07	body mass index	Salinas YD, BMC Genet, 2016	MYOD1; KCNC1
229	91740345	4	rs11727543	G	A	0.624424	0.00221477	0.00191856	0.23	0.621556	0.00986192	0.00264268	0.00017	0.627315	-0.00552345	0.00280128	0.041	0.621556	0.00986192	0.00264268	5.20975e-05	seasonal gut microbiome measurement	Davenport ER, PLoS One, 2015	CCSER1; TMSB4XP8
230	91741073	4	4:91741073	A	C	0.624557	0.00220168	0.00191835	0.24	0.621612	0.00986657	0.002642	0.00017	0.627525	-0.00558534	0.0028014	0.039	0.621612	0.00986657	0.002642	4.82574e-05	seasonal gut microbiome measurement	Davenport ER, PLoS One, 2015	CCSER1; TMSB4XP8
231	91742074	4	rs17017687	G	A	0.624905	0.00210635	0.00191848	0.26	0.622004	0.00971044	0.00264203	0.00022	0.62783	-0.00562477	0.00280173	0.038	0.622004	0.00971044	0.00264203	5.50823e-05	seasonal gut microbiome measurement	Davenport ER, PLoS One, 2015	CCSER1; TMSB4XP8
232	91743767	4	rs56712335	C	T	0.59404	0.0039186	0.00192534	0.042	0.591585	0.0128588	0.00264037	1.3e-06	0.596515	-0.00517224	0.00282368	0.055					seasonal gut microbiome measurement	Davenport ER, PLoS One, 2015	CCSER1; TMSB4XP8
233	91762984	4	rs10021524	A	G	0.580251	0.00470978	0.00187866	0.013	0.570654	0.010063	0.002577	9.5e-05	0.589926	-0.00117348	0.00275647	0.69	0.570654	0.010063	0.002577	0.00256376	-	-	CCSER1; TMSB4XP8
234	95339926	4	rs147757739	G	A	0.975386	-0.0249784	0.0061188	4.3e-05	0.975139	-0.0296909	0.00839127	0.0004	0.975636	-0.0183202	0.00897326	0.045	0.975139	-0.0296909	0.00839127	0.348585	diastolic blood pressure	Evangelou E, Nat Genet, 2018	-
235	95341934	4	rs74794213	G	A	0.975288	-0.0248101	0.00609807	4.6e-05	0.975101	-0.0297245	0.00838068	0.00039	0.975477	-0.0179709	0.00892348	0.048					diastolic blood pressure	Evangelou E, Nat Genet, 2018	-
236	95354497	4	rs35149199	T	A	0.396149	-0.00730814	0.00195663	0.00019	0.388456	-0.0111267	0.00268768	3.1e-05	0.403905	-0.00424416	0.00286613	0.18					-	-	AC109925.1; PDLIM5
237	95410489	4	rs144148554	C	G	0.975143	-0.0235037	0.0059925	8.6e-05	0.97389	-0.0258319	0.00809397	0.0014	0.976405	-0.0193063	0.00893131	0.033	0.97389	-0.0258319	0.00809397	0.5835	-	-	PDLIM5
238	96248653	4	rs114722371	T	G	0.967013	0.00381709	0.00555085	0.49	0.967733	0.0253758	0.007736	0.0011	0.966287	-0.0203033	0.00801188	0.0092	0.967733	0.0253758	0.007736	3.26894e-05	-	-	UNC5C
239	103019375	4	rs1506503	T	C	0.501821	-0.00652424	0.00186604	0.00051	0.499262	-0.00996625	0.00256864	8.8e-05	0.504401	-0.00288648	0.00272636	0.25	0.499262	-0.00996625	0.00256864	0.0555995	intelligence	Hill WD, Mol Psychiatry, 2018; Davies G, Nat Commun, 2018	BANK1
240	103945829	4	rs142740079	C	T	0.987129	0.0113363	0.00841897	0.17	0.986853	-0.0226516	0.0115246	0.049	0.987408	0.0424162	0.0123697	0.00052	0.986853	-0.0226516	0.0115246	9.70895e-05	-	-	SLC9B1; SLC9B2
241	104868632	4	4:104868632	C	T	0.897014	0.00696359	0.00314612	0.027	0.896978	-0.00369727	0.00440045	0.39	0.897049	0.0185004	0.00452528	6.4e-05	0.896978	-0.00369727	0.00440045	0.000368582	-	-	RNU6-635P; RP11-703G6.1
242	105732840	4	rs73836167	C	G	0.973879	0.0105088	0.00624765	0.093	0.973196	-0.0139352	0.00848109	0.094	0.974568	0.0351787	0.00926053	9.5e-05					response to bronchodilator, FEV/FEC ratio	Lutz SM, BMC Genet, 2015	RP11-556I14.2
243	107892049	4	4:107892049	G	C	0.983671	-0.0302843	0.00753409	5.8e-05	0.98515	-0.027865	0.0109721	0.012	0.98218	-0.0331291	0.0104628	0.0011	0.98515	-0.027865	0.0109721	0.725106	Alopecia; balding measurement; androgenetic alopecia	Hagenaars SP, PLoS Genet, 2017; Kichaev G, Am J Hum Genet, 2018; Yap CX, Nat Commun, 2018; Pickrell JK, Nat Genet, 2016	DKK2
244	107986177	4	rs72890644	T	C	0.985796	-0.0269282	0.00819034	0.00098	0.986279	-0.0490969	0.0114391	2.1e-05	0.985309	-0.0106773	0.0117974	0.34					-	-	DKK2
245	108287244	4	rs11941798	G	C	0.987554	-0.0265322	0.00866145	0.0022	0.986639	-0.0552904	0.0115337	1.8e-06	0.988476	0.00672082	0.0131169	0.6	0.986639	-0.0552904	0.0115337	0.000324061	telomere length	Lee JH, Front Genet, 2014	-
246	108421530	4	rs112959257	T	C	0.982148	-0.0225087	0.00730806	0.0019	0.983024	-0.043243	0.0102716	3.2e-05	0.981264	-0.00503834	0.0104648	0.52	0.983024	-0.043243	0.0102716	0.00832231	balding measurement	Yap CX, Nat Commun, 2018	-
247	108966282	4	rs371359962	A	T	0.989131	-0.0164896	0.00975188	0.083					0.988114	-0.0505853	0.0134517	8e-05					sporadic amyotrophic lateral sclerosis	Xie T, Neurobiol Aging, 2014	HADH; LEF1
248	109823207	4	rs10018644	T	C	0.91536	0.00214155	0.00338509	0.53	0.917014	-0.0111382	0.00470949	0.018	0.913692	0.0151383	0.00489422	0.0025	0.917014	-0.0111382	0.00470949	8.92617e-05	-	-	COL25A1
249	109867701	4	rs11945723	T	C	0.845066	0.00205405	0.00258189	0.45	0.844897	-0.00766532	0.00353973	0.028	0.845237	0.0125168	0.00378748	0.0016	0.844897	-0.00766532	0.00353973	8.05651e-05	schizophrenia, age at onset	Wang KS, Am J Med Genet B Neuropsychiatr Genet, 2011	COL25A1
250	109868917	4	rs10023653	G	T	0.845427	0.00174184	0.00258519	0.53	0.84513	-0.00785345	0.00354577	0.025	0.845726	0.0120884	0.00379066	0.0023	0.84513	-0.00785345	0.00354577	9.98575e-05	schizophrenia, age at onset	Wang KS, Am J Med Genet B Neuropsychiatr Genet, 2011	COL25A1
251	109872667	4	rs147366220	G	A	0.914403	0.00374156	0.00336467	0.27	0.915954	-0.00981287	0.00466196	0.036	0.91284	0.0173691	0.00488409	0.00054	0.915954	-0.00981287	0.00466196	4.55822e-05	schizophrenia, age at onset	Wang KS, Am J Med Genet B Neuropsychiatr Genet, 2011	COL25A1
252	109878863	4	rs12639812	C	T	0.859121	0.00161844	0.00268917	0.58	0.858882	-0.00932833	0.00371391	0.011	0.859361	0.0124507	0.00391585	0.0019	0.858882	-0.00932833	0.00371391	4.37146e-05	schizophrenia, age at onset	Wang KS, Am J Med Genet B Neuropsychiatr Genet, 2011	COL25A1
253	109882679	4	rs10003985	G	T	0.838735	0.00220418	0.00252961	0.4	0.837724	-0.00738551	0.00347993	0.032	0.839755	0.0123732	0.00369799	0.0012	0.837724	-0.00738551	0.00347993	8.12323e-05	schizophrenia, age at onset	Wang KS, Am J Med Genet B Neuropsychiatr Genet, 2011	COL25A1
254	109883240	4	rs17597897	C	T	0.839498	0.00248386	0.00252926	0.35	0.838885	-0.00704636	0.00348201	0.041	0.840117	0.0126232	0.00369469	0.00092	0.838885	-0.00704636	0.00348201	8.71943e-05	schizophrenia, age at onset	Wang KS, Am J Med Genet B Neuropsychiatr Genet, 2011	COL25A1
255	109883850	4	rs1895744	C	T	0.839413	0.00248443	0.0025297	0.35	0.838759	-0.00703578	0.0034826	0.041	0.840073	0.0126171	0.00369537	0.00093	0.838759	-0.00703578	0.0034826	8.86622e-05	schizophrenia, age at onset	Wang KS, Am J Med Genet B Neuropsychiatr Genet, 2011	COL25A1
256	109884724	4	rs10010416	G	A	0.839413	0.00249684	0.00252966	0.34	0.838796	-0.00704107	0.00348235	0.041	0.840034	0.012656	0.00369551	0.0009	0.838796	-0.00704107	0.00348235	8.54564e-05	schizophrenia, age at onset	Wang KS, Am J Med Genet B Neuropsychiatr Genet, 2011	COL25A1
257	109889837	4	rs17532510	T	C	0.839688	0.00254061	0.00252989	0.33	0.839137	-0.00699925	0.00348316	0.042	0.840244	0.0127309	0.00369531	0.00083	0.839137	-0.00699925	0.00348316	8.32522e-05	schizophrenia, age at onset	Wang KS, Am J Med Genet B Neuropsychiatr Genet, 2011	COL25A1
258	109894643	4	rs10025218	G	A	0.921662	0.00428513	0.0034758	0.22	0.921657	-0.0103584	0.00479992	0.031	0.921668	0.0186177	0.00506171	0.00027	0.921657	-0.0103584	0.00479992	2.58941e-05	schizophrenia, age at onset	Wang KS, Am J Med Genet B Neuropsychiatr Genet, 2011	COL25A1
259	109894737	4	rs10025147	C	A	0.921396	0.00410184	0.00346655	0.24	0.921398	-0.0106071	0.00478743	0.027	0.921394	0.018451	0.00504794	0.00029	0.921398	-0.0106071	0.00478743	2.33652e-05	schizophrenia, age at onset	Wang KS, Am J Med Genet B Neuropsychiatr Genet, 2011	COL25A1
260	109911187	4	rs138866932	G	A	0.883373	0.00180595	0.00293063	0.55	0.882652	-0.0105739	0.00404015	0.008	0.884101	0.0145991	0.0042751	0.00087	0.882652	-0.0105739	0.00404015	1.46315e-05	-	-	COL25A1
261	109920835	4	rs143071552	C	T	0.883662	0.00189228	0.00293477	0.53	0.882892	-0.0105784	0.00404638	0.0081	0.884438	0.0148028	0.00428061	0.00074	0.882892	-0.0105784	0.00404638	1.27784e-05	-	-	COL25A1
262	109933823	4	rs116661876	C	T	0.925013	0.00432943	0.00357345	0.22	0.92476	-0.0113992	0.00492028	0.02	0.925267	0.019611	0.00521921	0.0002	0.92476	-0.0113992	0.00492028	1.1954e-05	carotid plaque build	Pott J, Atherosclerosis, 2017	COL25A1
263	109952562	4	rs115947346	G	A	0.925418	0.00394025	0.00358112	0.27	0.925379	-0.0111807	0.0049503	0.023	0.925458	0.0183144	0.00520991	0.0005	0.925379	-0.0111807	0.0049503	3.23184e-05	carotid plaque build	Pott J, Atherosclerosis, 2017	COL25A1
264	116250888	4	rs184448788	A	G	0.985502	-0.0188305	0.00795719	0.014	0.985138	-0.0418557	0.0108142	9.3e-05	0.985869	0.000359402	0.0117798	1	0.985138	-0.0418557	0.0108142	0.00750563	-	-	-
265	116254896	4	rs142968730	C	T	0.985486	-0.0189362	0.00795129	0.014	0.9851	-0.0419864	0.0107986	8.7e-05	0.985875	0.000371295	0.0117798	1	0.9851	-0.0419864	0.0107986	0.00726748	-	-	-
266	117056351	4	rs75025431	A	C	0.954342	0.0175591	0.00452337	0.00012	0.953974	0.025656	0.006231	4.1e-05	0.954713	0.00993754	0.00660371	0.13					-	-	RP11-659O3.1
267	117062338	4	rs149901760	G	T	0.954025	0.0179869	0.00451256	7.7e-05	0.953924	0.0259219	0.00623659	3.5e-05	0.954127	0.0105548	0.00656632	0.11	0.953924	0.0259219	0.00623659	0.0856981	-	-	RP11-659O3.1
268	117074000	4	rs72905518	G	C	0.951583	0.0170919	0.00438788	0.00011	0.95017	0.0247511	0.00597948	3.6e-05	0.953008	0.0103698	0.00647778	0.11					-	-	RP11-659O3.1
269	117074016	4	rs72905521	T	C	0.951346	0.0169369	0.00437752	0.00012	0.949697	0.024447	0.00595217	4.2e-05	0.953008	0.0103698	0.00647778	0.11					-	-	RP11-659O3.1
270	117074155	4	rs11934587	A	G	0.950975	0.017069	0.00434884	9.6e-05	0.949029	0.0245738	0.00589358	3.2e-05	0.952938	0.0104739	0.00645844	0.11	0.949029	0.0245738	0.00589358	0.102435	-	-	RP11-659O3.1
271	117087785	4	rs72905525	C	T	0.953873	0.018528	0.00452016	4.6e-05	0.951911	0.0243587	0.00612548	7.8e-05	0.955851	0.013459	0.0067133	0.046					-	-	RP11-659O3.1
272	117095183	4	rs72905534	G	A	0.952926	0.0168626	0.00443714	0.00017	0.951501	0.0237488	0.00603864	8.9e-05	0.954363	0.0109872	0.0065596	0.095					-	-	RP11-659O3.1; TTC39CP1
273	119420370	4	rs150267548	G	T	0.940984	0.0128693	0.00401323	0.0017	0.93896	0.00286886	0.00543147	0.59	0.943023	0.0263669	0.00596855	2.5e-05	0.93896	0.00286886	0.00543147	0.00318993	longitudinal BMI measurement	Anderson D, PLoS One, 2015	CEP170P1
274	119425911	4	rs145639082	T	C	0.945319	0.0154838	0.00417896	0.00029	0.943528	0.0051424	0.00566595	0.36	0.947125	0.0291008	0.00620285	6.2e-06	0.943528	0.0051424	0.00566595	0.00387577	longitudinal BMI measurement	Anderson D, PLoS One, 2015	CEP170P1
275	119428376	4	rs188741910	G	A	0.945718	0.0143878	0.00421696	0.00085	0.943483	0.003988	0.00567146	0.48	0.947971	0.0283609	0.00631509	1.5e-05	0.943483	0.003988	0.00567146	0.00363833	longitudinal BMI measurement	Anderson D, PLoS One, 2015	CEP170P1
276	119450677	4	rs115480885	T	A	0.947634	0.0144619	0.00429589	0.001	0.9453	0.00447648	0.00578564	0.43	0.949987	0.0276742	0.00642363	3.1e-05	0.9453	0.00447648	0.00578564	0.00657878	longitudinal BMI measurement	Anderson D, PLoS One, 2015	CEP170P1
277	120726409	4	rs113940517	T	A	0.865588	0.00726016	0.00271575	0.0089	0.865279	0.014628	0.00373183	9.4e-05	0.865899	-0.000274307	0.00397455	0.74	0.865279	0.014628	0.00373183	0.0056359	-	-	RP11-236P13.1
278	120791853	4	rs116659899	A	T	0.958168	0.0144003	0.00469045	0.003	0.956491	0.0263851	0.00635317	4.3e-05	0.959858	0.000211536	0.00696954	0.99	0.956491	0.0263851	0.00635317	0.00494383	-	-	-
279	120792588	4	rs114277778	T	G	0.958145	0.0142693	0.00469126	0.0033	0.956397	0.0261517	0.0063468	5e-05	0.959908	0.000157337	0.00697968	1	0.956397	0.0261517	0.0063468	0.00526316	-	-	-
280	120795053	4	rs116059609	T	C	0.957626	0.0139308	0.004652	0.0038	0.955715	0.0255981	0.0062796	6e-05	0.959552	5.58601e-05	0.00693834	0.99	0.955715	0.0255981	0.0062796	0.00570767	-	-	-
281	120796560	4	rs77811915	T	C	0.957626	0.0139308	0.004652	0.0038	0.955715	0.0255981	0.0062796	6e-05	0.959552	5.58601e-05	0.00693834	0.99					-	-	-
282	120798486	4	4:120798486	C	T	0.946111	0.0118641	0.0041444	0.0054	0.943679	0.0243466	0.00565517	2.1e-05	0.948563	-0.00187729	0.00611075	0.77	0.943679	0.0243466	0.00565517	0.00142394	-	-	-
283	120800546	4	rs78885369	T	A	0.945946	0.0113455	0.00414535	0.008	0.943748	0.0241854	0.00566795	2.5e-05	0.948162	-0.00261975	0.00609901	0.67					-	-	-
284	120803822	4	rs78880870	C	G	0.957661	0.013075	0.00467448	0.0069	0.955873	0.0250574	0.00631934	9.9e-05	0.959463	-0.0010737	0.00696043	0.86					-	-	-
285	121671873	4	rs56684299	A	G	0.690765	0.00819503	0.00207651	7.4e-05	0.689598	0.00602753	0.00284394	0.034	0.691942	0.0115507	0.00304938	0.0002					DNA methylation	Zhang Q, Genome Med, 2018	PRDM5
286	122695385	4	rs6815790	A	C	0.773885	0.00497034	0.00223258	0.026	0.76801	-0.00315362	0.00303014	0.29	0.779808	0.0139177	0.00331108	2e-05					mean corpuscular volume	Kanai M, Nat Genet, 2018	TMEM155; AC079341.1
287	122695888	4	rs6534323	G	A	0.790892	0.00481157	0.00228737	0.036	0.784008	-0.00401754	0.0031056	0.19	0.797831	0.014679	0.00339169	1.3e-05					mean corpuscular volume	Kanai M, Nat Genet, 2018	TMEM155; AC079341.1
288	127241211	4	rs112667689	A	G	0.971307	0.0230747	0.00586989	7.1e-05	0.971758	0.0208609	0.00818989	0.0093	0.970853	0.0253394	0.00846304	0.0024	0.971758	0.0208609	0.00818989	0.70014	-	-	-
289	127580341	4	rs148983929	C	G	0.988349	0.029041	0.00868949	0.00085	0.986153	0.0442376	0.010878	4.8e-05					0.986153	0.0442376	0.010878	0.0368509	-	-	-
290	127591039	4	4:127591039	C	T	0.988368	0.0283143	0.00867846	0.0011	0.98626	0.0450736	0.0108956	3.5e-05					0.98626	0.0450736	0.0108956	0.0215272	-	-	-
291	128014114	4	rs186833665	G	T	0.983867	-0.00506317	0.00753477	0.53	0.985156	-0.0373576	0.01084	0.00064	0.982568	0.0241428	0.0105697	0.02	0.985156	-0.0373576	0.01084	3.88948e-05	-	-	RP11-810P8.1; RP11-125O18.1
292	133443903	4	rs147480339	C	A	0.966633	-0.0146684	0.00532109	0.0061	0.96714	-0.0285504	0.0073941	9.2e-05	0.966122	-0.00381132	0.0077018	0.68	0.96714	-0.0285504	0.0073941	0.0189405	-	-	-
293	136719202	4	rs73865625	T	G	0.793406	0.00900033	0.00230167	9.6e-05	0.796858	0.0105397	0.00316671	0.00097	0.789926	0.00699131	0.00336483	0.051					-	-	RP11-780O17.1
294	136721661	4	rs73865627	G	T	0.793197	0.00908183	0.00230148	8.3e-05	0.796663	0.0106662	0.00316602	0.00084	0.789704	0.00699541	0.00336501	0.051					-	-	RP11-780O17.1
295	139255247	4	rs298480	T	C	0.18096	-0.00969075	0.0024243	5.9e-05	0.179157	-0.00809216	0.00333442	0.015	0.182778	-0.012066	0.00354484	0.00081					schizophrenia, response to paliperidone, schizophrenia symptom severity measurement	Li Q, Pharmacogenet Genomics, 2016	LINC00498; LINC00499
296	139255319	4	rs298481	T	C	0.181771	-0.00961998	0.00242254	6.7e-05	0.180066	-0.00795079	0.0033306	0.017	0.18349	-0.0120811	0.00354374	0.00078					schizophrenia, response to paliperidone, schizophrenia symptom severity measurement	Li Q, Pharmacogenet Genomics, 2016	LINC00498; LINC00499
297	139256496	4	rs298483	C	T	0.190417	-0.00947634	0.00238056	6.3e-05	0.189244	-0.00860802	0.00326935	0.0084	0.191599	-0.0111664	0.00348607	0.0015					schizophrenia, response to paliperidone, schizophrenia symptom severity measurement	Li Q, Pharmacogenet Genomics, 2016	LINC00498; LINC00499
298	139262188	4	rs298466	C	T	0.196266	-0.00940986	0.00234693	5.5e-05	0.195426	-0.00851718	0.00322141	0.008	0.197113	-0.0113646	0.00343868	0.001					schizophrenia, response to paliperidone, schizophrenia symptom severity measurement	Li Q, Pharmacogenet Genomics, 2016	LINC00499
299	139263147	4	rs298468	A	G	0.181293	-0.0096009	0.00242553	6.9e-05	0.180255	-0.00827597	0.0033295	0.013	0.182339	-0.0116269	0.00355366	0.0013					schizophrenia, response to paliperidone, schizophrenia symptom severity measurement	Li Q, Pharmacogenet Genomics, 2016	LINC00499
300	139943070	4	rs146907510	G	C	0.944084	-0.0163839	0.00417469	0.00011	0.945931	-0.00766657	0.00583143	0.19	0.942222	-0.0248605	0.00601303	3.4e-05	0.945931	-0.00766657	0.00583143	0.0376263	chronotype measurement	Jones SE, Nat Commun, 2019	RP11-371F15.3; CCRN4L; AC093602.1; ELF2
301	139962550	4	rs76818654	A	G	0.943669	-0.0157236	0.00415604	0.0002	0.945565	-0.00672128	0.00580255	0.24	0.941758	-0.0244201	0.00598898	4.3e-05					chronotype measurement	Jones SE, Nat Commun, 2019	CCRN4L; AC093602.1; ELF2; RNU6-531P
302	140520649	4	rs795380	A	C	0.29841	0.00555659	0.0021033	0.0087	0.289951	-0.000874049	0.00291439	0.74	0.306938	0.0119331	0.00305497	6.6e-05					Alzheimer's disease, age at onset; LDL peak particle diameter measurement, total fat intake measurement	Herold C, Mol Psychiatry, 2016; Rudkowska I, J Nutrigenet Nutrigenomics, 2015	SETD7; RP11-308D13.3
303	147271022	4	rs111963516	A	G	0.962985	-0.00282118	0.00495841	0.56	0.964623	-0.0236659	0.00691756	0.00064	0.961333	0.0156219	0.00715046	0.025	0.964623	-0.0236659	0.00691756	6.35151e-05	-	-	SLC10A7
304	147280504	4	rs111476662	T	C	0.962997	-0.00277126	0.0049597	0.57	0.964648	-0.0235852	0.00692125	0.00067	0.961333	0.0156219	0.00715046	0.025	0.964648	-0.0235852	0.00692125	6.60419e-05	chronotype measurement	Jones SE, Nat Commun, 2019	SLC10A7
305	147286963	4	rs2255242	T	A	0.963054	-0.00237715	0.0049733	0.62	0.96478	-0.023103	0.00695653	0.00092	0.961314	0.0156771	0.00715421	0.025	0.96478	-0.023103	0.00695653	8.28912e-05	chronotype measurement	Jones SE, Nat Commun, 2019	SLC10A7
306	147289414	4	rs2244316	C	G	0.962408	-0.00148568	0.00494505	0.75	0.964068	-0.0222057	0.00691765	0.0014	0.960735	0.0166164	0.00711285	0.017	0.964068	-0.0222057	0.00691765	7.41115e-05	chronotype measurement	Jones SE, Nat Commun, 2019	SLC10A7
307	147289424	4	rs2244317	A	T	0.962408	-0.00148568	0.00494505	0.75	0.964068	-0.0222057	0.00691765	0.0014	0.960735	0.0166164	0.00711285	0.017	0.964068	-0.0222057	0.00691765	7.41115e-05	chronotype measurement	Jones SE, Nat Commun, 2019	SLC10A7
308	147289431	4	4:147289431	G	A	0.962408	-0.00148568	0.00494505	0.75	0.964068	-0.0222057	0.00691765	0.0014	0.960735	0.0166164	0.00711285	0.017	0.964068	-0.0222057	0.00691765	7.41115e-05	chronotype measurement	Jones SE, Nat Commun, 2019	SLC10A7
309	147289522	4	rs2244321	A	C	0.962443	-0.00140695	0.00494577	0.77	0.964087	-0.0221815	0.00691874	0.0014	0.960786	0.0167485	0.0071138	0.016	0.964087	-0.0221815	0.00691874	7.09367e-05	chronotype measurement	Jones SE, Nat Commun, 2019	SLC10A7
310	154883022	4	rs62332095	C	T	0.973227	0.0163249	0.00614555	0.0079	0.972679	-0.00339676	0.00827674	0.65	0.973779	0.0384156	0.00918741	2.1e-05					DNA methylation; nose morphology measurement	Renteria ME, Twin Res Hum Genet, 2013; Cha S, BMC Genomics, 2018	-
311	155954956	4	rs79028271	G	C	0.97393	-0.0206522	0.00590251	0.00047	0.972975	-0.00358052	0.00805582	0.62	0.974892	-0.0400726	0.00869974	6.3e-06					-	-	-
312	155968840	4	rs116520582	A	C	0.972257	-0.0189735	0.00558354	0.00072	0.971108	-0.00643759	0.0075805	0.37	0.973416	-0.0335446	0.00827552	7.9e-05	0.971108	-0.00643759	0.0075805	0.0144404	-	-	-
313	156384709	4	rs908588	C	G	0.168061	-0.00998513	0.00247979	6.8e-05	0.169348	-0.00948497	0.00338357	0.005	0.166764	-0.0100159	0.00365578	0.0045					pulse pressure measurement; ankle injury	Giri A, Nat Genet, 2018; Warren HR, Nat Genet, 2017; Kim SK, PLoS One, 2017	RP11-627H22.9; MTND6P17; MTND5P9; MTND4P8; MTND3P3; RP11-627H22.8; MTATP6P9; RP11-627H22.6; RP11-627H22.5; MTND2P33; MTND1P22
314	158467079	4	rs1369026	C	G	0.439907	-0.0077586	0.00187187	3.7e-05	0.44325	-0.00678767	0.00258632	0.0081	0.436537	-0.00752663	0.00272477	0.0056	0.44325	-0.00678767	0.00258632	0.842099	-	-	-
315	158467213	4	rs1434379	A	G	0.440144	-0.00775329	0.00187047	3.7e-05	0.443856	-0.00673938	0.00258346	0.0086	0.436403	-0.00757863	0.00272377	0.0053	0.443856	-0.00673938	0.00258346	0.820884	-	-	-
316	158470819	4	rs4690886	G	T	0.443112	-0.00832025	0.00189502	1.2e-05	0.447054	-0.00703089	0.00261937	0.0067	0.439138	-0.00845759	0.00275745	0.0021					-	-	RP11-364P22.1
317	158473449	4	rs2014197	G	C	0.446827	-0.00879133	0.00190513	4.1e-06	0.449886	-0.00681692	0.00264205	0.0089	0.443742	-0.00992351	0.00276305	0.00036	0.449886	-0.00681692	0.00264205	0.410515	-	-	RP11-364P22.1
318	163168284	4	rs143138995	C	T	0.94219	-0.0157325	0.00405618	8e-05	0.944203	-0.0166936	0.00570915	0.003	0.940162	-0.0166753	0.00580098	0.0034	0.944203	-0.0166936	0.00570915	0.998183	longevity; schizophrenia, response to paliperidone, schizophrenia symptom severity measurement	Zeng Y, JAMA Netw Open, 2018; Li Q, Pharmacogenet Genomics, 2016	-
319	163326947	4	rs1901120	G	A	0.918292	0.00766701	0.00338021	0.019	0.913954	-0.0029341	0.0045557	0.54	0.922666	0.0195727	0.00505181	7e-05	0.913954	-0.0029341	0.0045557	0.000806361	colorectal cancer	Schmit SL, Carcinogenesis, 2014	-
320	163336348	4	rs1470692	T	A	0.916886	0.00800403	0.00337462	0.015	0.911973	-0.00359763	0.00454311	0.45	0.921839	0.0209499	0.00505037	2.2e-05	0.911973	-0.00359763	0.00454311	0.000252705	colorectal cancer	Schmit SL, Carcinogenesis, 2014	-
321	163345468	4	rs2262313	G	T	0.895576	0.00800392	0.00305331	0.0075	0.891181	-0.00240744	0.00414638	0.59	0.900006	0.0186766	0.00452568	2e-05	0.891181	-0.00240744	0.00414638	0.00050376	colorectal cancer	Schmit SL, Carcinogenesis, 2014	-
322	163349584	4	rs2712672	A	G	0.89334	0.00769227	0.00302983	0.0095	0.888311	-0.00341569	0.00410512	0.43	0.89841	0.0193667	0.00450239	8.2e-06					colorectal cancer	Schmit SL, Carcinogenesis, 2014	-
323	163367829	4	rs2597484	G	A	0.89492	0.00650702	0.00298995	0.026	0.890866	-0.00376745	0.00403927	0.37	0.899008	0.0171209	0.00445627	6.5e-05					-	-	-
324	163564805	4	rs195982	C	T	0.326577	-0.00505974	0.00200482	0.011	0.332671	0.00124475	0.00273286	0.64	0.320434	-0.0113116	0.00295951	7.7e-05	0.332671	0.00124475	0.00273286	0.00159553	self reported educational attainment	Lee JJ, Nat Genet, 2018	-
325	163566107	4	rs195981	C	T	0.284944	-0.00536119	0.00205473	0.009	0.293515	0.000797596	0.00279512	0.77	0.276304	-0.0113256	0.00304095	9.7e-05	0.293515	0.000797596	0.00279512	0.00295399	self reported educational attainment	Lee JJ, Nat Genet, 2018	-
326	163572567	4	rs195914	T	C	0.337237	-0.00481374	0.00196975	0.014	0.341194	0.00142435	0.00269507	0.59	0.333249	-0.0111221	0.0028959	8.5e-05	0.341194	0.00142435	0.00269507	0.00131843	self reported educational attainment	Lee JJ, Nat Genet, 2018	-
327	163574892	4	rs195910	C	G	0.33706	-0.00484854	0.00196585	0.014	0.340739	0.00139351	0.00269084	0.59	0.33335	-0.0111398	0.00288888	7.9e-05	0.340739	0.00139351	0.00269084	0.00130401	self reported educational attainment	Lee JJ, Nat Genet, 2018	-
328	163599599	4	rs182015	C	T	0.300899	-0.00557321	0.00202317	0.0059	0.308926	0.000969525	0.00275797	0.72	0.292807	-0.0117445	0.0029873	4.7e-05	0.308926	0.000969525	0.00275797	0.00154063	-	-	-
329	163603404	4	rs195925	A	T	0.35507	-0.00556161	0.00194749	0.0045	0.356636	0.000689116	0.00266862	0.78	0.353491	-0.011675	0.00285842	3.7e-05	0.356636	0.000689116	0.00266862	0.00136449	mathematical ability	Lee JJ, Nat Genet, 2018	-
330	163603694	4	rs195924	T	C	0.385796	-0.00565155	0.00195256	0.0037	0.390916	0.00149557	0.0026787	0.59	0.380635	-0.0123111	0.00286304	1.4e-05	0.390916	0.00149557	0.0026787	0.000362053	mathematical ability	Lee JJ, Nat Genet, 2018	-
331	163605363	4	rs195921	C	T	0.356917	-0.00583981	0.00194166	0.0027	0.358693	0.000335943	0.00266023	0.89	0.355126	-0.011835	0.00285032	2.7e-05	0.358693	0.000335943	0.00266023	0.00156988	mathematical ability	Lee JJ, Nat Genet, 2018	-
332	163607401	4	rs2051966	A	G	0.356597	-0.00574159	0.00194356	0.0032	0.358163	0.000586797	0.00266361	0.81	0.355018	-0.0119487	0.00285224	2.3e-05	0.358163	0.000586797	0.00266361	0.00114175	mathematical ability	Lee JJ, Nat Genet, 2018	-
333	163607458	4	rs2051965	G	C	0.3566	-0.0057429	0.00194356	0.0032	0.358163	0.000586797	0.00266361	0.81	0.355024	-0.011951	0.00285222	2.3e-05	0.358163	0.000586797	0.00266361	0.00113931	mathematical ability	Lee JJ, Nat Genet, 2018	-
334	163608422	4	rs195945	T	A	0.356556	-0.00574565	0.00194376	0.0032	0.358125	0.000597083	0.00266387	0.81	0.354973	-0.0119653	0.00285254	2.2e-05	0.358125	0.000597083	0.00266387	0.00111534	mathematical ability	Lee JJ, Nat Genet, 2018	-
335	163613806	4	rs6847027	C	T	0.379355	-0.0063693	0.00192275	0.00096	0.380103	-0.000253673	0.00263379	0.93	0.3786	-0.0121156	0.00282308	1.4e-05					mathematical ability	Lee JJ, Nat Genet, 2018	-
336	163614745	4	rs2190491	A	G	0.302002	-0.00587313	0.00201885	0.0036	0.310062	0.000693272	0.00275422	0.8	0.293876	-0.0120587	0.00297851	2.8e-05	0.310062	0.000693272	0.00275422	0.00145544	mathematical ability	Lee JJ, Nat Genet, 2018	-
337	163615148	4	rs11100456	A	C	0.301919	-0.00586855	0.0020195	0.0037	0.310005	0.000691466	0.00275501	0.8	0.293767	-0.0120453	0.00297958	2.8e-05	0.310005	0.000691466	0.00275501	0.00147992	mathematical ability	Lee JJ, Nat Genet, 2018	-
338	163615521	4	rs12511162	T	C	0.301967	-0.00587287	0.00201903	0.0036	0.310024	0.000695772	0.00275447	0.8	0.293844	-0.0120582	0.00297877	2.8e-05	0.310024	0.000695772	0.00275447	0.00145435	mathematical ability	Lee JJ, Nat Genet, 2018	-
339	163616100	4	rs7656640	G	C	0.302043	-0.00590455	0.00201932	0.0034	0.310043	0.000662317	0.00275556	0.81	0.293977	-0.012091	0.00297837	2.6e-05					mathematical ability	Lee JJ, Nat Genet, 2018	-
340	163616176	4	rs7656312	A	C	0.379507	-0.00636764	0.00192296	0.00097	0.380305	-0.000236059	0.00263418	0.93	0.378701	-0.0121366	0.00282326	1.4e-05					mathematical ability	Lee JJ, Nat Genet, 2018	-
341	163619655	4	rs6839354	C	T	0.3019	-0.00589325	0.00201902	0.0035	0.310011	0.00065173	0.00275538	0.81	0.293723	-0.0120446	0.00297773	2.8e-05					mathematical ability	Lee JJ, Nat Genet, 2018	-
342	163624251	4	rs195539	A	G	0.301989	-0.00597562	0.00202054	0.0031	0.309967	0.000643989	0.00275864	0.81	0.293946	-0.0122107	0.00297856	2.2e-05	0.309967	0.000643989	0.00275864	0.00134281	mathematical ability	Lee JJ, Nat Genet, 2018	-
343	163625183	4	rs195540	G	A	0.302743	-0.00587741	0.00202072	0.0036	0.31109	0.000727203	0.00275961	0.79	0.294327	-0.012102	0.00297822	2.6e-05	0.31109	0.000727203	0.00275961	0.00137432	mathematical ability	Lee JJ, Nat Genet, 2018	-
344	165700679	4	rs6841926	G	A	0.119141	-0.00581131	0.00287602	0.041	0.12112	-0.0154455	0.00391153	7.4e-05	0.117146	0.00386054	0.00425457	0.43					-	-	RP11-294O2.2; RNU6-668P
345	165826864	4	rs150279064	G	A	0.885514	8.34046e-05	0.00300462	0.97	0.888178	0.0127193	0.00420574	0.0026	0.882829	-0.0119333	0.00431927	0.0062	0.888178	0.0127193	0.00420574	3.45077e-05	-	-	RP11-366M4.3; TRIM60P14; RP11-366M4.2; FAM218BP
346	166006584	4	rs190154432	T	C	0.986854	-0.0258933	0.00826663	0.0021	0.987497	-0.046431	0.0117602	9e-05	0.986206	-0.00730983	0.0117082	0.52	0.987497	-0.046431	0.0117602	0.0169604	-	-	RP11-219C20.1; RP11-219C20.3; TMEM192
347	166266500	4	rs7690328	T	A	0.759808	-0.00983979	0.002181	6.3e-06	0.751918	-0.0120866	0.00295582	4.4e-05	0.767763	-0.00812299	0.00324061	0.023					heel bone mineral density; fasting blood insulin measurement; insulin resistance; adolescent idiopathic scoliosis	Morris JA, Nat Genet, 2018; Kichaev G, Am J Hum Genet, 2018; Chen G, Hum Mol Genet, 2012; Liu J, Hum Genet, 2018; Kim SK, PLoS One, 2018	KLHL2; MSMO1; CPE
348	166266727	4	rs4691183	C	T	0.75648	-0.00962242	0.00216423	8.5e-06	0.748959	-0.0116129	0.00293395	7.5e-05	0.764061	-0.00826667	0.00321443	0.019					heel bone mineral density; fasting blood insulin measurement; insulin resistance; adolescent idiopathic scoliosis	Morris JA, Nat Genet, 2018; Kichaev G, Am J Hum Genet, 2018; Chen G, Hum Mol Genet, 2012; Liu J, Hum Genet, 2018; Kim SK, PLoS One, 2018	KLHL2; MSMO1; CPE
349	166267119	4	rs7667236	G	A	0.758994	-0.00976104	0.00216755	6.6e-06	0.751451	-0.011876	0.00294147	5.6e-05	0.766599	-0.00821525	0.00321583	0.02					heel bone mineral density; fasting blood insulin measurement; insulin resistance; adolescent idiopathic scoliosis	Morris JA, Nat Genet, 2018; Kichaev G, Am J Hum Genet, 2018; Chen G, Hum Mol Genet, 2012; Liu J, Hum Genet, 2018; Kim SK, PLoS One, 2018	KLHL2; MSMO1; CPE
350	166334840	4	rs1866224	G	T	0.931657	-0.0146737	0.00368238	6.7e-05	0.932374	-0.0126402	0.00509849	0.015	0.930934	-0.0178641	0.0053488	0.001	0.932374	-0.0126402	0.00509849	0.474017	vital capacity; pelvic organ prolapse	Kichaev G, Am J Hum Genet, 2018; Giri A, PLoS One, 2015	CPE; HADHAP1
351	169571145	4	rs145287839	T	G	0.982366	-0.0244833	0.00738241	0.00083	0.983113	0.00478039	0.0103083	0.66	0.981614	-0.0520907	0.0106363	9.2e-07	0.983113	0.00478039	0.0103083	0.000100831	-	-	PALLD; RP11-610J23.1
352	171226154	4	rs11946492	C	T	0.972352	-0.0254961	0.005745	8.9e-06	0.972887	-0.0256858	0.00787115	0.0012	0.971814	-0.0278915	0.00843344	0.0011	0.972887	-0.0256858	0.00787115	0.846458	stromal cell-derived factor 1 alpha measurement	Ahola-Olli AV, Am J Hum Genet, 2016	RP11-789C1.1
353	171235666	4	rs11942934	G	A	0.974031	-0.0236496	0.0059098	6.5e-05	0.974104	-0.0233288	0.0080147	0.0038	0.973957	-0.0261632	0.00876841	0.0034	0.974104	-0.0233288	0.0080147	0.809064	stromal cell-derived factor 1 alpha measurement	Ahola-Olli AV, Am J Hum Genet, 2016	-
354	171607605	4	rs147459755	A	G	0.982772	-0.00746139	0.00758115	0.33	0.983888	0.0237449	0.0108196	0.027	0.981646	-0.0355161	0.0107081	0.0011	0.983888	0.0237449	0.0108196	8.05713e-05	DNA methylation	Zhang Q, Genome Med, 2018	-
355	174585389	4	rs148207786	C	T	0.976406	0.0269465	0.00632898	2.1e-05	0.976262	0.0274003	0.00881223	0.0017	0.976552	0.0277812	0.00914286	0.0028	0.976262	0.0274003	0.00881223	0.975765	vital capacity; type 1 diabetes nephropathy; hormone measurement; pulse pressure measurement; atrial fibrillation	Kichaev G, Am J Hum Genet, 2018; Sandholm N, PLoS Genet, 2012; Comuzzie AG, PLoS One, 2012; Warren HR, Nat Genet, 2017; Lee JY, Eur Heart J, 2017; Low SK, Nat Genet, 2017	-
356	175569828	4	rs4695779	G	C	0.903401	-0.0046297	0.00313288	0.14	0.905848	-0.0171326	0.00436544	9.2e-05	0.900935	0.00718694	0.00452303	0.11					Malignant epithelial tumor of ovary, response to paclitaxel; primary biliary cirrhosis	Gao B, Sci Rep, 2018; Qiu F, Nat Commun, 2017	GLRA3
357	175575454	4	rs10023554	A	T	0.90609	-0.00428644	0.00319756	0.18	0.907873	-0.0173412	0.00445059	0.0001	0.904293	0.00813167	0.00462109	0.074	0.907873	-0.0173412	0.00445059	5.7944e-05	Malignant epithelial tumor of ovary, response to paclitaxel; primary biliary cirrhosis	Gao B, Sci Rep, 2018; Qiu F, Nat Commun, 2017	GLRA3
358	178345422	4	rs79862939	G	C	0.968771	-0.0184478	0.00571628	0.0013	0.968301	-0.0366559	0.00776909	2.7e-06	0.969244	-0.0022286	0.00846186	0.83					-	-	AGA; RP11-130F10.1
359	180291145	4	rs34869584	G	A	0.932959	0.0110934	0.00374625	0.0032	0.934229	0.000265735	0.00519101	0.96	0.931678	0.0203667	0.00543754	9e-05					cervical carcinoma, response to platinum-based neoadjuvant chemotherapy; ulcerative colitis	Li X, Sci Rep, 2017; Haritunians T, Inflamm Bowel Dis, 2010	RP11-404J23.1
360	181944885	4	rs80307126	T	C	0.931666	0.0149396	0.00375912	6.7e-05	0.931088	0.0138148	0.00517089	0.0076	0.93225	0.0157327	0.00549584	0.0043					small cell lung carcinoma; smoking behavior, unipolar depression	McKay JD, Nat Genet, 2017; Heinzman JT, J Affect Disord, 2018	-
361	181948508	4	rs75257445	T	C	0.926542	0.0145461	0.00363575	6e-05	0.926621	0.0145219	0.0050011	0.0037	0.926463	0.0143181	0.00531551	0.0074					small cell lung carcinoma; smoking behavior, unipolar depression	McKay JD, Nat Genet, 2017; Heinzman JT, J Affect Disord, 2018	-
362	182323334	4	rs1159951	G	A	0.078794	0.00695141	0.00343956	0.042	0.0772142	-0.00484114	0.00476897	0.35	0.0803867	0.0197509	0.00498948	9.8e-05	0.0772142	-0.00484114	0.00476897	0.000307989	endometriosis	Sobalska-Kwapis M, Eur J Obstet Gynecol Reprod Biol, 2017	-
363	182693867	4	rs73871707	T	C	0.985711	-0.0361266	0.00788733	5.4e-06	0.98339	-0.0369506	0.0101222	0.00025	0.98805	-0.0351039	0.0125207	0.0055					aspartate aminotransferase measurement	Comuzzie AG, PLoS One, 2012	-
364	182709117	4	rs73871710	C	T	0.983038	-0.0328958	0.00737747	9.5e-06	0.981113	-0.0417051	0.00960739	1.3e-05	0.984978	-0.0228036	0.0114831	0.052					aspartate aminotransferase measurement	Comuzzie AG, PLoS One, 2012	-
365	183527484	4	rs62339122	C	T	0.961249	0.0188361	0.00483307	8.4e-05	0.959059	0.0135405	0.00650953	0.031	0.963457	0.0251678	0.00722657	0.00024					response to diisocyanate, asthma	Yucesoy B, Toxicol Sci, 2015	TENM3
366	183529135	4	rs17258479	C	T	0.980726	0.027197	0.00698179	9.2e-05	0.979271	0.0245765	0.00927995	0.0075	0.982193	0.0326926	0.0105968	0.0013	0.979271	0.0245765	0.00927995	0.559566	response to diisocyanate, asthma	Yucesoy B, Toxicol Sci, 2015	TENM3; RN7SKP67
43	9639311	5	rs149187155	C	T	0.987234	-0.0159835	0.0091284	0.081	0.989301	-0.0665319	0.0139821	1.9e-06	0.98515	0.0217893	0.0121883	0.086	0.989301	-0.0665319	0.0139821	1.42243e-06	PR interval, Trypanosoma cruzi seropositivity; autism	Deng X, PLoS One, 2013; Weiss LA, Nature, 2009	CTD-2001E22.1; TAS2R1; CTD-2143L24.1
368	184789839	4	rs62340397	C	T	0.7941	-0.00532706	0.0023168	0.023	0.791963	-0.0132597	0.00318955	4.8e-05	0.796254	0.00274929	0.00338448	0.37					self reported educational attainment; mathematical ability; intraocular pressure measurement; cognitive function measurement	Lee JJ, Nat Genet, 2018; Gao XR, Hum Mol Genet, 2018	STOX2
369	184792121	4	rs62340398	G	A	0.803233	-0.00540973	0.00234133	0.022	0.79923	-0.0136482	0.00320637	2.9e-05	0.807269	0.00281502	0.0034392	0.34					self reported educational attainment; mathematical ability; intraocular pressure measurement; cognitive function measurement	Lee JJ, Nat Genet, 2018; Gao XR, Hum Mol Genet, 2018	STOX2
370	184793000	4	rs72994786	A	G	0.803411	-0.00548929	0.00234196	0.02	0.799382	-0.0137861	0.00320781	2.4e-05	0.807473	0.00281163	0.00343952	0.34					self reported educational attainment; mathematical ability; intraocular pressure measurement; cognitive function measurement	Lee JJ, Nat Genet, 2018; Gao XR, Hum Mol Genet, 2018	STOX2
371	184795283	4	rs61242067	C	T	0.816063	-0.00733782	0.00239549	0.0025	0.812642	-0.0154503	0.00328816	3.5e-06	0.819512	0.000697109	0.00351026	0.7					self reported educational attainment; mathematical ability; intraocular pressure measurement; cognitive function measurement	Lee JJ, Nat Genet, 2018; Gao XR, Hum Mol Genet, 2018	STOX2
372	184796040	4	rs113029972	C	T	0.830523	-0.00760001	0.0024877	0.0024	0.826287	-0.0151176	0.00341118	1.2e-05	0.834794	-0.000520042	0.00364963	0.95	0.826287	-0.0151176	0.00341118	0.00308309	self reported educational attainment; mathematical ability; intraocular pressure measurement; cognitive function measurement	Lee JJ, Nat Genet, 2018; Gao XR, Hum Mol Genet, 2018	STOX2
373	184796689	4	4:184796689	C	G	0.808503	-0.0077748	0.00238304	0.0012	0.804277	-0.0158561	0.00326289	1.5e-06	0.812764	1.45167e-06	0.00350125	0.86	0.804277	-0.0158561	0.00326289	0.000791976	self reported educational attainment; mathematical ability; intraocular pressure measurement; cognitive function measurement	Lee JJ, Nat Genet, 2018; Gao XR, Hum Mol Genet, 2018	STOX2
374	185344932	4	rs6827840	C	T	0.93072	-0.00852812	0.00372961	0.024	0.927567	-0.0196776	0.0049802	7.8e-05	0.933897	0.00289933	0.00563115	0.5					Alzheimer's disease, hippocampal volume; adolescent idiopathic scoliosis	Chung J, Alzheimers Dement, 2017; Liu J, Hum Genet, 2018	IRF2; SNORD79
375	187014000	4	rs73025959	A	C	0.928237	-0.0166438	0.00366905	6.8e-06	0.929832	-0.0167832	0.00514512	0.0012	0.926628	-0.0168868	0.00526507	0.0017					-	-	TLR3; FAM149A
376	187014051	4	rs73025960	C	T	0.924148	-0.0150076	0.00357991	3.5e-05	0.926098	-0.01502	0.00501931	0.003	0.922183	-0.0150928	0.00513809	0.0039					-	-	TLR3; FAM149A
377	187014548	4	rs73025962	T	C	0.798442	-0.0085085	0.00240034	0.00047	0.800271	-0.0154504	0.00331226	3.4e-06	0.796598	-0.000962575	0.00349831	0.8					-	-	TLR3; FAM149A
378	187015877	4	rs73025964	C	T	0.927515	-0.0149201	0.00360098	4.1e-05	0.928766	-0.0152884	0.00503776	0.0026	0.926253	-0.0134321	0.00517871	0.012					-	-	TLR3; FAM149A
379	187022823	4	rs13145311	T	C	0.850203	-0.010828	0.002594	2.8e-05	0.854656	-0.0117253	0.00363029	0.0012	0.845714	-0.00974498	0.00373024	0.011	0.854656	-0.0117253	0.00363029	0.700007	-	-	TLR3; FAM149A
380	187135190	4	rs72647309	T	A	0.882892	0.00693342	0.00292052	0.014	0.878949	-0.00173285	0.00395845	0.68	0.886867	0.0169496	0.00433724	7.8e-05					BNP measurement; blood metabolite measurement, protein measurement, amino acid measurement; apolipoprotein A-IV measurement; vasoactive peptide measurement; coronary artery calcification; serum metabolite measurement; blood metabolite measurement; IGF-1 measurement; factor XI measurement; plasma kallikrein measurement; blood protein measurement; metabolite measurement; cerebral amyloid deposition…	Musani SK, Circ Cardiovasc Genet, 2015; Kettunen J, Nat Commun, 2016; Lamina C, Hum Mol Genet, 2016; Verweij N, Hypertension, 2013; Inouye M, PLoS Genet, 2012; Yu B, PLoS Genet, 2014; Shin SY, Nat Genet, 2014; Comuzzie AG, PLoS One, 2012; Suhre K, Nat Commun, 2017; Sun BB, Nature, 2018; Suhre K, Nature, 2011; Kettunen J, Nat Genet, 2012; Krumsiek J, PLoS Genet, 2012; Yan Q, Mol Psychiatry, 2018	AC110771.1; CYP4V2; KLKB1
381	187136882	4	rs28386792	C	A	0.875592	0.00654802	0.00284094	0.018	0.873536	-0.00203114	0.00387481	0.62	0.877665	0.0164078	0.00419018	9.6e-05					BNP measurement; blood metabolite measurement, protein measurement, amino acid measurement; L-arginine measurement; apolipoprotein A-IV measurement; vasoactive peptide measurement; coronary artery calcification; serum metabolite measurement; blood metabolite measurement; IGF-1 measurement; factor XI measurement; plasma kallikrein measurement; blood protein measurement; metabolite measurement; cer…	Musani SK, Circ Cardiovasc Genet, 2015; Kettunen J, Nat Commun, 2016; Zhang W, Thromb Haemost, 2016; Lamina C, Hum Mol Genet, 2016; Verweij N, Hypertension, 2013; Inouye M, PLoS Genet, 2012; Yu B, PLoS Genet, 2014; Shin SY, Nat Genet, 2014; Comuzzie AG, PLoS One, 2012; Suhre K, Nat Commun, 2017; Sun BB, Nature, 2018; Suhre K, Nature, 2011; Kettunen J, Nat Genet, 2012; Krumsiek J, PLoS Genet, 2012…	AC110771.1; CYP4V2; KLKB1
382	187146809	4	rs6847184	C	T	0.902749	0.00474671	0.00321084	0.13	0.899943	-0.00765368	0.00433535	0.079	0.905577	0.0188397	0.00478755	9.1e-05					BNP measurement; blood metabolite measurement, protein measurement, amino acid measurement; L-arginine measurement; apolipoprotein A-IV measurement; vasoactive peptide measurement; coronary artery calcification; serum metabolite measurement; blood metabolite measurement; IGF-1 measurement; factor XI measurement; plasma kallikrein measurement; partial thromboplastin time; blood protein measurement…	Musani SK, Circ Cardiovasc Genet, 2015; Kettunen J, Nat Commun, 2016; Zhang W, Thromb Haemost, 2016; Lamina C, Hum Mol Genet, 2016; Verweij N, Hypertension, 2013; Inouye M, PLoS Genet, 2012; Yu B, PLoS Genet, 2014; Shin SY, Nat Genet, 2014; Comuzzie AG, PLoS One, 2012; Suhre K, Nat Commun, 2017; Kanai M, Nat Genet, 2018; Sun BB, Nature, 2018; Ahola-Olli AV, Am J Hum Genet, 2016; Suhre K, Nature, …	CYP4V2; KLKB1
383	187583159	4	rs73030856	C	T	0.773055	-0.00933444	0.00221421	2.5e-05	0.772268	-0.0095689	0.00304361	0.0018	0.773849	-0.00910763	0.00323949	0.0068					-	-	FAT1
384	187609847	4	rs73015634	T	C	0.882598	-0.0121882	0.00305663	8.1e-05	0.882986	-0.0166914	0.00416745	6.7e-05	0.882206	-0.00679295	0.00450969	0.14					PR interval	van Setten J, Nat Commun, 2018	FAT1
7	2021002	20	rs147313374	G	A	0.979833	-0.00781693	0.00725985	0.3	0.978205	0.0263062	0.00957207	0.0068	0.981474	-0.0433112	0.0111219	0.00013	0.978205	0.0263062	0.00957207	1.55338e-06	response to bronchodilator, FEV/FEC ratio	Lutz SM, BMC Genet, 2015	-
386	188099410	4	rs12500287	T	C	0.969309	0.0074355	0.00543038	0.18	0.968843	-0.0152448	0.00738696	0.039	0.969779	0.0302888	0.00803122	0.00015	0.968843	-0.0152448	0.00738696	2.37892e-05	susceptibility to mononucleosis measurement	Tian C, Nat Commun, 2017	RP11-308K2.1
387	189381674	4	rs80090740	G	A	0.962655	-0.0182453	0.0050324	0.00024	0.964023	-0.00788861	0.00705369	0.23	0.961276	-0.0295801	0.00722482	7.4e-05					-	-	LINC01060
388	189391519	4	rs140081877	C	A	0.985961	-0.0238796	0.00814049	0.0029	0.986816	0.00466201	0.0115071	0.74	0.985099	-0.0487085	0.0115961	3.6e-05	0.986816	0.00466201	0.0115071	0.000937396	-	-	LINC01060
389	189391584	4	rs74629928	T	C	0.969043	-0.0182116	0.00558307	0.00093	0.973215	0.00418665	0.00822381	0.64	0.964837	-0.0334666	0.00769013	7.7e-06					-	-	LINC01060
1	526174	19	rs111428539	C	A	0.974237	-0.013616	0.00614987	0.03	0.973978	0.00670324	0.00835956	0.4	0.974498	-0.0353718	0.00909129	6.2e-05	0.973978	0.00670324	0.00835956	0.000560328	blood protein measurement	Sun BB, Nature, 2018	MADCAM1; AC005775.2; TPGS1; CDC34; GZMM
2	536068	19	rs4541184	G	A	0.905086	-0.013183	0.00361033	0.00029	0.905217	-0.00342817	0.00496708	0.48	0.904954	-0.0216182	0.00527084	4.2e-05					blood protein measurement	Sun BB, Nature, 2018	TPGS1; CDC34; GZMM
3	1322312	19	rs758147	T	C	0.0452591	-0.0148485	0.00478392	0.0019	0.0488266	-0.0281974	0.00629716	7.4e-06	0.0416624	0.00235294	0.00734063	0.76					peanut allergy measurement, parental genotype effect measurement	Liu X, Medicine (Baltimore), 2018	MUM1; EFNA2; RPS15P9; AC005330.2
4	1323329	19	rs1009661	A	G	0.0481442	-0.0130454	0.00469391	0.0053	0.0516339	-0.0257723	0.00618501	3.1e-05	0.044626	0.00297106	0.00719312	0.69	0.0516339	-0.0257723	0.00618501	0.00215384	peanut allergy measurement, parental genotype effect measurement	Liu X, Medicine (Baltimore), 2018	MUM1; EFNA2; RPS15P9; AC005330.2
5	1323931	19	rs1974565	A	G	0.0535375	-0.0158283	0.00443405	0.00037	0.0553747	-0.0282218	0.00596375	2.2e-06	0.0516853	-0.00204145	0.0066316	0.82	0.0553747	-0.0282218	0.00596375	0.00295186	peanut allergy measurement, parental genotype effect measurement	Liu X, Medicine (Baltimore), 2018	MUM1; EFNA2; RPS15P9; AC005330.2
6	1326714	19	rs8111242	T	C	0.0449107	-0.0163611	0.00470913	0.00055	0.0473694	-0.0294783	0.00626405	2.5e-06	0.042432	-1.1987e-05	0.0071333	0.97					peanut allergy measurement, parental genotype effect measurement	Liu X, Medicine (Baltimore), 2018	MUM1; RPS15P9; AC005330.2
7	1326731	19	rs8107884	C	G	0.0450785	-0.016347	0.0047034	0.00055	0.0475776	-0.0294796	0.0062543	2.4e-06	0.0425591	1.86026e-05	0.00712754	0.97					peanut allergy measurement, parental genotype effect measurement	Liu X, Medicine (Baltimore), 2018	MUM1; RPS15P9; AC005330.2
8	1327070	19	rs10405034	T	C	0.0443691	-0.015676	0.0047497	0.001	0.0468332	-0.0295833	0.00632537	2.9e-06	0.041885	0.00142952	0.0071851	0.82	0.0468332	-0.0295833	0.00632537	0.00103523	peanut allergy measurement, parental genotype effect measurement	Liu X, Medicine (Baltimore), 2018	MUM1; RPS15P9; AC005330.2
9	1327644	19	rs7258669	A	G	0.0449709	-0.0148049	0.00450447	0.0011	0.047565	-0.0271194	0.00601319	6.3e-06	0.0423556	0.000402926	0.00679534	0.94					peanut allergy measurement, parental genotype effect measurement	Liu X, Medicine (Baltimore), 2018	MUM1; RPS15P9; AC005330.2
10	1327670	19	rs10424550	G	A	0.0444008	-0.0158828	0.00456319	0.00052	0.0471865	-0.0284752	0.00606716	2.6e-06	0.0415925	-0.00042222	0.0069164	0.98	0.0471865	-0.0284752	0.00606716	0.00201696	peanut allergy measurement, parental genotype effect measurement	Liu X, Medicine (Baltimore), 2018	MUM1; RPS15P9; AC005330.2
11	2902419	19	rs4806887	C	T	0.191348	-0.00923271	0.00237389	8.4e-05	0.187989	-0.00710165	0.00329174	0.029	0.194734	-0.0106798	0.00343923	0.0017					daytime rest measurement; dementia, Alzheimer's disease neuropathologic change	Spada J, J Sleep Res, 2016; Beecham GW, PLoS Genet, 2014	ZNF556; AC119403.1; ZNF57; AC006277.2
12	3219701	19	rs34061946	T	A	0.850633	-0.0093485	0.00275557	0.0008	0.845975	-0.00263502	0.00376688	0.49	0.855329	-0.0164528	0.00405101	8.3e-05					self reported educational attainment; leukocyte count; neutrophil count	Lee JJ, Nat Genet, 2018; Kichaev G, Am J Hum Genet, 2018; Kanai M, Nat Genet, 2018	NCLN; CELF5
13	4197164	19	rs76342816	G	A	0.833598	-0.00908211	0.00257192	0.00041	0.829119	-0.00264152	0.00352489	0.44	0.838114	-0.0160946	0.0037707	1.8e-05					mean corpuscular hemoglobin	Kichaev G, Am J Hum Genet, 2018	CREB3L3; SIRT6; ANKRD24; RN7SL84P
14	4199423	19	rs56708710	T	G	0.822514	-0.00751441	0.00252825	0.0028	0.818673	-0.00122642	0.00347525	0.71	0.826386	-0.0142997	0.00369521	9.6e-05					mean corpuscular hemoglobin	Kichaev G, Am J Hum Genet, 2018	SIRT6; ANKRD24; RN7SL84P
15	4200013	19	rs45544832	G	A	0.83738	-0.00854689	0.00259163	0.00096	0.833573	-0.00202781	0.00355222	0.56	0.841217	-0.0157453	0.00379894	3.1e-05					mean corpuscular hemoglobin	Kichaev G, Am J Hum Genet, 2018	SIRT6; ANKRD24; RN7SL84P
16	4200266	19	rs45609439	C	T	0.814609	-0.00788811	0.00248273	0.0014	0.811431	-0.00203428	0.00341036	0.54	0.817814	-0.0145304	0.00363092	4.8e-05					mean corpuscular hemoglobin	Kichaev G, Am J Hum Genet, 2018	SIRT6; ANKRD24; RN7SL84P
17	4200576	19	rs115090939	C	G	0.813235	-0.00800507	0.00247291	0.0012	0.810251	-0.00206208	0.00339295	0.53	0.816243	-0.0147366	0.00362077	3.5e-05	0.810251	-0.00206208	0.00339295	0.00968595	mean corpuscular hemoglobin	Kichaev G, Am J Hum Genet, 2018	SIRT6; ANKRD24; RN7SL84P
18	4202290	19	rs116266250	C	T	0.817817	-0.00868552	0.00249368	0.00049	0.813828	-0.00248929	0.00341689	0.46	0.821839	-0.0158509	0.00365656	1.2e-05	0.813828	-0.00248929	0.00341689	0.00685273	mean corpuscular hemoglobin	Kichaev G, Am J Hum Genet, 2018	SIRT6; ANKRD24; RN7SL84P
19	4202997	19	rs114927925	C	T	0.814106	-0.00796956	0.00246679	0.0012	0.811084	-0.00202591	0.00339022	0.54	0.817152	-0.0146481	0.00360566	3.6e-05	0.811084	-0.00202591	0.00339022	0.00979801	mean corpuscular hemoglobin	Kichaev G, Am J Hum Genet, 2018	SIRT6; ANKRD24; RN7SL84P
20	4203169	19	rs145126111	C	G	0.814014	-0.00796258	0.00246519	0.0012	0.811059	-0.00208039	0.00338857	0.53	0.816993	-0.0145727	0.0036027	3.9e-05	0.811059	-0.00208039	0.00338857	0.0105276	mean corpuscular hemoglobin	Kichaev G, Am J Hum Genet, 2018	SIRT6; ANKRD24; RN7SL84P
21	4203286	19	rs149382512	T	C	0.814014	-0.00796258	0.00246519	0.0012	0.811059	-0.00208039	0.00338857	0.53	0.816993	-0.0145727	0.0036027	3.9e-05	0.811059	-0.00208039	0.00338857	0.0105276	mean corpuscular hemoglobin	Kichaev G, Am J Hum Genet, 2018	SIRT6; ANKRD24; RN7SL84P
22	4203943	19	rs140652387	G	A	0.814014	-0.00796258	0.00246519	0.0012	0.811059	-0.00208039	0.00338857	0.53	0.816993	-0.0145727	0.0036027	3.9e-05	0.811059	-0.00208039	0.00338857	0.0105276	mean corpuscular hemoglobin	Kichaev G, Am J Hum Genet, 2018	SIRT6; ANKRD24; RN7SL84P
23	4204021	19	rs59108960	C	T	0.814014	-0.00796258	0.00246519	0.0012	0.811059	-0.00208039	0.00338857	0.53	0.816993	-0.0145727	0.0036027	3.9e-05					mean corpuscular hemoglobin	Kichaev G, Am J Hum Genet, 2018	SIRT6; ANKRD24; RN7SL84P
24	4204872	19	rs116361773	G	A	0.813605	-0.00770224	0.00246028	0.0017	0.810863	-0.00206721	0.00338436	0.53	0.81637	-0.0140167	0.00359273	7.2e-05	0.810863	-0.00206721	0.00338436	0.0142112	mean corpuscular hemoglobin	Kichaev G, Am J Hum Genet, 2018	SIRT6; ANKRD24; RN7SL84P; EBI3
25	4204963	19	rs141453290	A	G	0.813605	-0.00770224	0.00246028	0.0017	0.810863	-0.00206721	0.00338436	0.53	0.81637	-0.0140167	0.00359273	7.2e-05	0.810863	-0.00206721	0.00338436	0.0142112	mean corpuscular hemoglobin	Kichaev G, Am J Hum Genet, 2018	SIRT6; ANKRD24; RN7SL84P; EBI3
26	4205038	19	19:4205038	T	C	0.813605	-0.00770224	0.00246028	0.0017	0.810863	-0.00206721	0.00338436	0.53	0.81637	-0.0140167	0.00359273	7.2e-05	0.810863	-0.00206721	0.00338436	0.0142112	mean corpuscular hemoglobin	Kichaev G, Am J Hum Genet, 2018	SIRT6; ANKRD24; RN7SL84P; EBI3
27	4205149	19	rs150429823	T	C	0.812107	-0.00781418	0.00245093	0.0014	0.809677	-0.00207262	0.00336745	0.53	0.814557	-0.0142453	0.00358336	5.2e-05	0.809677	-0.00207262	0.00336745	0.0121752	mean corpuscular hemoglobin	Kichaev G, Am J Hum Genet, 2018	SIRT6; ANKRD24; RN7SL84P; EBI3
28	4205654	19	19:4205654	G	C	0.813605	-0.00770224	0.00246028	0.0017	0.810863	-0.00206721	0.00338436	0.53	0.81637	-0.0140167	0.00359273	7.2e-05	0.810863	-0.00206721	0.00338436	0.0142112	mean corpuscular hemoglobin	Kichaev G, Am J Hum Genet, 2018	SIRT6; ANKRD24; RN7SL84P; EBI3
29	4207852	19	rs7251041	C	T	0.827081	-0.00774989	0.0025264	0.0021	0.822925	-0.00111298	0.003466	0.74	0.831271	-0.0148905	0.00369994	5.5e-05					mean corpuscular hemoglobin	Kichaev G, Am J Hum Genet, 2018	ANKRD24; RN7SL84P; EBI3
30	4207964	19	rs61742016	C	T	0.817539	-0.0086534	0.00247509	0.00046	0.813853	-0.00266112	0.00339693	0.43	0.821254	-0.0155225	0.00362311	1.5e-05					mean corpuscular hemoglobin	Kichaev G, Am J Hum Genet, 2018	ANKRD24; RN7SL84P; EBI3
31	4208225	19	rs116238606	G	T	0.816177	-0.00875094	0.00246485	0.00038	0.812699	-0.00266704	0.00337943	0.42	0.819683	-0.0157178	0.00361183	1.1e-05	0.812699	-0.00266704	0.00337943	0.00753735	mean corpuscular hemoglobin	Kichaev G, Am J Hum Genet, 2018	ANKRD24; RN7SL84P; EBI3
32	4218238	19	rs115794225	G	A	0.798138	-0.00794218	0.00233352	0.00065	0.799521	-0.00194596	0.00321811	0.54	0.796744	-0.0142547	0.00339871	1.7e-05	0.799521	-0.00194596	0.00321811	0.00773755	mean corpuscular hemoglobin	Kichaev G, Am J Hum Genet, 2018	ANKRD24; RN7SL84P; EBI3
33	4219053	19	rs139768642	T	C	0.838358	-0.0073986	0.00255759	0.0037	0.83498	-0.000254475	0.00350698	0.93	0.841764	-0.0150647	0.00374728	5.2e-05	0.83498	-0.000254475	0.00350698	0.00347297	mean corpuscular hemoglobin	Kichaev G, Am J Hum Genet, 2018	ANKRD24; RN7SL84P; EBI3
34	4220006	19	rs145012392	C	T	0.828309	-0.00694992	0.00249502	0.0051	0.824432	-0.000146293	0.00341465	0.95	0.832218	-0.0142427	0.00366298	9.6e-05	0.824432	-0.000146293	0.00341465	0.00436087	mean corpuscular hemoglobin	Kichaev G, Am J Hum Genet, 2018	ANKRD24; RN7SL84P; EBI3
35	4220509	19	rs116820744	A	G	0.82799	-0.00712537	0.00249849	0.0041	0.824029	-0.000151925	0.00342063	0.95	0.831983	-0.0146738	0.00366675	5.9e-05	0.824029	-0.000151925	0.00342063	0.00335867	mean corpuscular hemoglobin	Kichaev G, Am J Hum Genet, 2018	ANKRD24; RN7SL84P; EBI3
36	4220821	19	rs138278389	G	A	0.82829	-0.00711113	0.00250189	0.0043	0.824401	-0.000197575	0.00342614	0.94	0.832212	-0.0146256	0.00367076	6.4e-05	0.824401	-0.000197575	0.00342614	0.00361413	mean corpuscular hemoglobin	Kichaev G, Am J Hum Genet, 2018	ANKRD24; RN7SL84P; EBI3
37	4220844	19	rs114876055	G	A	0.828259	-0.00713121	0.00250165	0.0042	0.82435	-0.000226579	0.00342556	0.94	0.832199	-0.0146355	0.00367069	6.3e-05	0.82435	-0.000226579	0.00342556	0.00365592	mean corpuscular hemoglobin	Kichaev G, Am J Hum Genet, 2018	ANKRD24; RN7SL84P; EBI3
38	4221544	19	rs7250082	C	A	0.827777	-0.00706632	0.00250055	0.0045	0.823846	-0.000108921	0.00342435	0.96	0.831741	-0.0146116	0.00366875	6.4e-05					mean corpuscular hemoglobin	Kichaev G, Am J Hum Genet, 2018	ANKRD24; RN7SL84P; EBI3
39	4222266	19	rs144151625	G	A	0.827777	-0.00706632	0.00250055	0.0045	0.823846	-0.000108921	0.00342435	0.96	0.831741	-0.0146116	0.00366875	6.4e-05	0.823846	-0.000108921	0.00342435	0.00342646	mean corpuscular hemoglobin	Kichaev G, Am J Hum Genet, 2018	ANKRD24; RN7SL84P; EBI3; CCDC94
40	4224215	19	rs60268262	C	T	0.817285	-0.00678446	0.0024628	0.006	0.813355	0.000549206	0.00337182	0.87	0.821248	-0.0143681	0.00361427	6.2e-05					mean corpuscular hemoglobin	Kichaev G, Am J Hum Genet, 2018	ANKRD24; RN7SL84P; EBI3; CCDC94
41	4225667	19	rs114434150	T	C	0.827971	-0.0072195	0.00251548	0.0039	0.823928	-0.000285485	0.00344383	0.92	0.832047	-0.0147525	0.00369177	6e-05	0.823928	-0.000285485	0.00344383	0.00370761	mean corpuscular hemoglobin	Kichaev G, Am J Hum Genet, 2018	ANKRD24; RN7SL84P; EBI3; CCDC94
42	4226296	19	rs147609451	G	A	0.972742	-0.0205099	0.0060594	0.00082	0.973454	-0.00259496	0.00839412	0.77	0.972024	-0.0354873	0.00878614	2.3e-05	0.973454	-0.00259496	0.00839412	0.0061176	mean corpuscular hemoglobin	Kichaev G, Am J Hum Genet, 2018	ANKRD24; RN7SL84P; EBI3; CCDC94
43	4518225	19	rs28367328	C	T	0.80001	-0.00677657	0.00241669	0.0046	0.805204	-0.00132262	0.00335502	0.67	0.794772	-0.0137613	0.00349798	6.8e-05					low density lipoprotein cholesterol measurement; mean corpuscular hemoglobin; waist-hip ratio; erythrocyte count; reticulocyte count; mean corpuscular volume; hemoglobin measurement; mean corpuscular hemoglobin concentration	Klarin D, Nat Genet, 2018; Kichaev G, Am J Hum Genet, 2018; Astle WJ, Cell, 2016	HDGFRP2; PLIN4; PLIN5; CTB-50L17.14; LRG1; SEMA6B
44	4519971	19	rs10402719	G	C	0.810993	-0.00728441	0.00246773	0.0028	0.815733	-0.00151436	0.00342986	0.64	0.806213	-0.0144424	0.00356766	4e-05	0.815733	-0.00151436	0.00342986	0.00815407	mean corpuscular hemoglobin; waist-hip ratio; erythrocyte count; reticulocyte count; mean corpuscular volume; hemoglobin measurement; mean corpuscular hemoglobin concentration	Kichaev G, Am J Hum Genet, 2018; Astle WJ, Cell, 2016	HDGFRP2; PLIN4; PLIN5; CTB-50L17.14; LRG1; SEMA6B
45	5599046	19	rs16993056	T	C	0.971903	0.0033591	0.00581039	0.54	0.971493	-0.0204413	0.00791393	0.011	0.972316	0.0287838	0.00857136	0.00085	0.971493	-0.0204413	0.00791393	1.92672e-05	obsessive-compulsive symptom measurement; von Willebrand factor measurement, coagulation factor measurement	den Braber A, Transl Psychiatry, 2016; Antoni G, BMC Med Genet, 2011	SNRPEP4; SAFB2; SAFB
46	5599262	19	rs16993058	C	T	0.979944	-0.00582409	0.00679804	0.4	0.979006	-0.0310591	0.00911605	0.00068	0.980889	0.0240118	0.0102005	0.02	0.979006	-0.0310591	0.00911605	4.56917e-05	obsessive-compulsive symptom measurement; von Willebrand factor measurement, coagulation factor measurement	den Braber A, Transl Psychiatry, 2016; Antoni G, BMC Med Genet, 2011	SNRPEP4; SAFB2; SAFB
47	5644850	19	rs16993075	C	T	0.97461	0.00120609	0.00627549	0.82	0.974218	-0.0224991	0.00850435	0.0088	0.975006	0.0286069	0.00930733	0.0025	0.974218	-0.0224991	0.00850435	4.04014e-05	-	-	SAFB2; SAFB
48	5659865	19	rs16993084	A	G	0.97875	-0.00534556	0.00670079	0.44	0.978078	-0.0307689	0.00906877	0.00071	0.979426	0.0237885	0.00995255	0.018	0.978078	-0.0307689	0.00906877	4.07044e-05	red blood cell distribution width	Kichaev G, Am J Hum Genet, 2018	SAFB; RPL36; C19orf70; HSD11B1L
49	5687922	19	rs186351373	G	A	0.979073	-0.00403419	0.00682321	0.57	0.978873	-0.0323006	0.00932482	0.00057	0.979274	0.0268245	0.0100299	0.0085	0.978873	-0.0323006	0.00932482	1.22944e-05	mean corpuscular hemoglobin; red blood cell distribution width; erythrocyte count	Kichaev G, Am J Hum Genet, 2018	SAFB; RPL36; C19orf70; HSD11B1L; LONP1
50	5692378	19	rs111694482	C	T	0.972485	-0.00225471	0.00619416	0.73	0.97329	-0.0269229	0.00865571	0.002	0.971674	0.0232135	0.00890651	0.011	0.97329	-0.0269229	0.00865571	4.34329e-05	mean corpuscular hemoglobin; red blood cell distribution width; erythrocyte count	Kichaev G, Am J Hum Genet, 2018	SAFB; RPL36; C19orf70; HSD11B1L; LONP1
228	91739242	4	rs1377913	T	C	0.579928	0.00229255	0.00188802	0.22	0.576148	0.0113009	0.00260872	1.4e-05	0.583738	-0.00662456	0.00274825	0.013	0.576148	0.0113009	0.00260872	1.65971e-06	seasonal gut microbiome measurement	Davenport ER, PLoS One, 2015	CCSER1; TMSB4XP8
52	9103668	19	rs561936572	G	T	0.989758	-0.0386616	0.00950493	4.1e-05	0.988841	-0.0343325	0.0125854	0.0057									Tourette syndrome; eye color; susceptibility to cold sores measurement	Yu D, Am J Psychiatry, 2019; Rawofi L, PeerJ, 2017; Tian C, Nat Commun, 2017	MUC16
53	9103721	19	19:9103721	T	C	0.989787	-0.0386227	0.00951144	4.2e-05	0.988891	-0.0342386	0.0126011	0.0059					0.988891	-0.0342386	0.0126011	0.506576	Tourette syndrome; eye color; susceptibility to cold sores measurement	Yu D, Am J Psychiatry, 2019; Rawofi L, PeerJ, 2017; Tian C, Nat Commun, 2017	MUC16
54	13995095	19	rs114246971	G	A	0.970604	0.00463504	0.0060256	0.45	0.970382	-0.0213257	0.00823625	0.01	0.970828	0.0271274	0.0088558	0.0025	0.970382	-0.0213257	0.00823625	4.96068e-05	-	-	NANOS3; MIR181C; MIR181D; C19orf57; CC2D1A
55	14416537	19	rs114811777	T	C	0.964213	-0.0133871	0.00501569	0.0077	0.96215	0.00191975	0.0067371	0.8	0.966294	-0.0315783	0.00751336	2.6e-05	0.96215	0.00191975	0.0067371	0.000775008	tumor necrosis factor beta measurement	Ahola-Olli AV, Am J Hum Genet, 2016	CTD-2189E23.1; CTC-548K16.2
56	15015882	19	rs542103082	A	T	0.987139	0.0350385	0.00879719	8.4e-05					0.984171	0.0382724	0.0114748	0.002					breast carcinoma	Michailidou K, Nature, 2017	OR7A17; OR7A18P; OR7A1P; OR7A3P; OR7A11P; OR7A15P
57	15195139	19	rs73006902	G	A	0.982411	0.031791	0.00725904	1.8e-05	0.983195	0.0441487	0.0102904	2e-05	0.98162	0.0164215	0.0103003	0.092					-	-	OR1I1; SYDE1
58	15197737	19	rs58719128	C	T	0.982772	0.0309066	0.00708878	1.9e-05	0.983724	0.045109	0.0100967	8.8e-06	0.981811	0.0147487	0.0100166	0.12					-	-	OR1I1; SYDE1
59	15198024	19	rs59166286	A	T	0.982772	0.0309066	0.00708878	1.9e-05	0.983724	0.045109	0.0100967	8.8e-06	0.981811	0.0147487	0.0100166	0.12					-	-	OR1I1; SYDE1
60	15198441	19	rs73008811	G	T	0.982791	0.0311802	0.00709542	1.6e-05	0.983762	0.0457675	0.010117	6.7e-06	0.981811	0.0147487	0.0100166	0.12					-	-	OR1I1; SYDE1
61	15198606	19	rs73008812	C	T	0.982794	0.0312684	0.00709593	1.5e-05	0.983769	0.0459616	0.0101185	6.1e-06	0.981811	0.0147487	0.0100166	0.12					-	-	OR1I1; SYDE1
62	15198751	19	rs16980312	T	C	0.983848	0.0305324	0.00733124	4.8e-05	0.984608	0.0460878	0.0103639	9.6e-06	0.983083	0.0126886	0.0104289	0.19	0.984608	0.0460878	0.0103639	0.021412	-	-	OR1I1; SYDE1
63	15198851	19	rs16980313	A	T	0.983025	0.0318231	0.0072573	1.7e-05	0.983977	0.0477318	0.0103699	4.6e-06	0.982066	0.0146443	0.0102261	0.13	0.983977	0.0477318	0.0103699	0.0213973	-	-	OR1I1; SYDE1
64	15199641	19	rs60904637	T	C	0.979785	0.0302503	0.00708238	2.7e-05	0.980898	0.0445465	0.0101132	1.2e-05	0.978663	0.014143	0.00998566	0.13					loneliness measurement	Gao J, Neuropsychopharmacology, 2016	OR1I1; SYDE1
65	15200126	19	rs73008827	C	A	0.983025	0.0318231	0.0072573	1.7e-05	0.983977	0.0477318	0.0103699	4.6e-06	0.982066	0.0146443	0.0102261	0.13					loneliness measurement	Gao J, Neuropsychopharmacology, 2016	OR1I1; SYDE1
66	15200498	19	rs73008829	A	T	0.983025	0.0318231	0.0072573	1.7e-05	0.983977	0.0477318	0.0103699	4.6e-06	0.982066	0.0146443	0.0102261	0.13					loneliness measurement	Gao J, Neuropsychopharmacology, 2016	OR1I1; SYDE1
67	15200629	19	rs73008831	A	T	0.983025	0.0318231	0.0072573	1.7e-05	0.983977	0.0477318	0.0103699	4.6e-06	0.982066	0.0146443	0.0102261	0.13					loneliness measurement	Gao J, Neuropsychopharmacology, 2016	OR1I1; SYDE1
68	15202269	19	rs112440927	G	A	0.979516	0.0251268	0.00673601	0.00025	0.98028	0.0413243	0.00955264	1.6e-05	0.978746	0.00968481	0.00955469	0.28	0.98028	0.0413243	0.00955264	0.0177071	loneliness measurement	Gao J, Neuropsychopharmacology, 2016	OR1I1; SYDE1; ILVBL
69	15202427	19	rs113447160	G	A	0.979912	0.0267146	0.00683372	0.00013	0.980829	0.0444842	0.00975098	5.8e-06	0.978988	0.0100149	0.00964079	0.27	0.980829	0.0444842	0.00975098	0.0109007	loneliness measurement	Gao J, Neuropsychopharmacology, 2016	OR1I1; SYDE1; ILVBL
70	15202944	19	rs59746284	T	C	0.978747	0.0242139	0.00681296	0.0005	0.979372	0.0387093	0.00965144	6.8e-05	0.978116	0.0103763	0.00967297	0.25					loneliness measurement	Gao J, Neuropsychopharmacology, 2016	OR1I1; SYDE1; ILVBL
71	16938277	19	rs75789653	G	A	0.876121	-0.011485	0.00285281	4.5e-05	0.873883	-0.0123461	0.00388546	0.0014	0.878377	-0.0103563	0.00420892	0.015					-	-	NWD1; SIN3B; CTD-2538G9.5
72	16941966	19	rs7253285	C	T	0.863323	-0.0106239	0.00275178	8.8e-05	0.861582	-0.0107988	0.00375214	0.0038	0.865079	-0.0103194	0.00405482	0.011					-	-	NWD1; SIN3B; CTD-2538G9.5
73	16946811	19	rs10425195	C	G	0.875412	-0.0111288	0.00285524	7.8e-05	0.872773	-0.0124965	0.00388618	0.0012	0.878072	-0.00956926	0.00421562	0.025	0.872773	-0.0124965	0.00388618	0.605125	-	-	NWD1; SIN3B; CTD-2538G9.5
74	17066748	19	rs142903011	A	G	0.96732	-0.0174623	0.00546523	0.0012	0.966711	-0.0292988	0.00750755	9.6e-05	0.967934	-0.00708902	0.00799145	0.44	0.966711	-0.0292988	0.00750755	0.04023	-	-	CPAMD8
75	17068474	19	rs75465445	C	T	0.96732	-0.0174623	0.00546523	0.0012	0.966711	-0.0292988	0.00750755	9.6e-05	0.967934	-0.00708902	0.00799145	0.44					-	-	CPAMD8
76	18406560	19	rs535373662	A	G	0.974078	-0.0174406	0.00615412	0.0046	0.975183	-0.0354953	0.00872783	5e-05	0.972965	-0.00154141	0.00872934	0.84					body fat percentage; autoimmune disease; hypothyroidism; mean corpuscular hemoglobin; waist-hip ratio; erythrocyte count; glomerular filtration rate; eosinophil count; monocyte count; mean corpuscular volume; interleukin 2 receptor antagonist measurement; granulocyte percentage of myeloid white cells; intraocular pressure measurement; monocyte percentage of leukocytes; BMI-adjusted waist circumfe…	Hubel C, Am J Med Genet B Neuropsychiatr Genet, 2018; Kichaev G, Am J Hum Genet, 2018; Morris AP, Nat Commun, 2019; Astle WJ, Cell, 2016; Ahola-Olli AV, Am J Hum Genet, 2016; Jain D, Hum Mol Genet, 2017; Gao XR, Hum Mol Genet, 2018; Shungin D, Nature, 2015; Justice AE, Nat Commun, 2017; Winkler TW, PLoS Genet, 2015; Tikkanen E, Sci Rep, 2018	KIAA1683; JUND; MIR3188; RPL39P38; LSM4
77	20128372	19	rs10405773	A	G	0.798768	-0.00690672	0.00235321	0.0035	0.793654	-0.0151959	0.00321921	2.6e-06	0.803924	0.00185145	0.0034567	0.56	0.793654	-0.0151959	0.00321921	0.000257197	-	-	ZNF682; AC006539.1; AC006539.3
78	21403747	19	rs11880246	T	A	0.96866	-0.0165416	0.00554282	0.002	0.966692	-0.00480529	0.00750051	0.49	0.970644	-0.0327545	0.00823586	7e-05	0.966692	-0.00480529	0.00750051	0.0110554	-	-	CTD-3233P19.8; CTD-3233P19.7; RPL36AP51
79	21410891	19	rs148382461	C	A	0.968527	-0.0167926	0.00552968	0.0017	0.966597	-0.00485437	0.00749044	0.48	0.970472	-0.0331559	0.00820711	5.4e-05	0.966597	-0.00485437	0.00749044	0.00989519	-	-	CTD-3233P19.8; CTD-3233P19.7; RPL36AP51
80	21452765	19	rs144003057	C	T	0.967865	-0.017216	0.00545262	0.0011	0.965985	-0.0042198	0.00741528	0.54	0.96976	-0.0345532	0.00805847	1.8e-05	0.965985	-0.0042198	0.00741528	0.005029	-	-	CTD-3233P19.7; CTD-3030D20.1; VN1R83P; ZNF708
81	21474645	19	rs144961826	C	T	0.968327	-0.0170486	0.00546478	0.0013	0.967878	-0.00144435	0.00755279	0.8	0.96878	-0.0349398	0.00794195	1e-05	0.967878	-0.00144435	0.00755279	0.00196696	-	-	CTD-3030D20.1; VN1R83P; ZNF708
82	21508121	19	rs185596787	T	C	0.971855	-0.0205339	0.00575037	0.00025	0.969966	-0.00589677	0.00777815	0.42	0.97376	-0.0396507	0.00854806	4.3e-06	0.969966	-0.00589677	0.00777815	0.00309905	-	-	ZNF708; CTD-3030D20.2
83	21509658	19	rs11879313	C	T	0.971811	-0.0204537	0.00574981	0.00026	0.969928	-0.00578372	0.00777718	0.42	0.973709	-0.0396246	0.00854747	4.4e-06	0.969928	-0.00578372	0.00777718	0.00302057	-	-	ZNF708; CTD-3030D20.2
84	21512646	19	rs190321065	C	T	0.966224	-0.0182744	0.00524238	0.00035	0.963531	-0.00983639	0.00704861	0.15	0.968939	-0.0307582	0.00784598	9.6e-05	0.963531	-0.00983639	0.00704861	0.0445542	-	-	ZNF708; CTD-3030D20.2
85	21516113	19	rs146046445	C	T	0.966224	-0.0182744	0.00524238	0.00035	0.963531	-0.00983639	0.00704861	0.15	0.968939	-0.0307582	0.00784598	9.6e-05	0.963531	-0.00983639	0.00704861	0.0445542	-	-	ZNF708; CTD-3030D20.2
86	21517688	19	rs116404209	C	A	0.966224	-0.0182744	0.00524238	0.00035	0.963531	-0.00983639	0.00704861	0.15	0.968939	-0.0307582	0.00784598	9.6e-05	0.963531	-0.00983639	0.00704861	0.0445542	-	-	ZNF708; CTD-3030D20.2; ZNF738
87	21518058	19	rs115222862	T	C	0.966196	-0.0182501	0.00523615	0.00035	0.96343	-0.00962836	0.00703447	0.16	0.968984	-0.0309447	0.00784399	8.6e-05	0.96343	-0.00962836	0.00703447	0.0404779	-	-	ZNF708; CTD-3030D20.2; ZNF738
88	21539253	19	rs149192955	A	G	0.96618	-0.0182288	0.00522764	0.00035	0.963292	-0.0092579	0.0070137	0.17	0.969092	-0.0313512	0.00784328	7e-05	0.963292	-0.0092579	0.0070137	0.033469	-	-	ZNF738; CTD-2561J22.1
89	21554605	19	rs115691680	G	A	0.966028	-0.0181217	0.00520914	0.00036	0.963109	-0.0092402	0.00698674	0.17	0.968971	-0.0310904	0.00781826	7.6e-05	0.963109	-0.0092402	0.00698674	0.0348276	-	-	ZNF738; CTD-2561J22.1; CTD-2561J22.2
90	21564053	19	rs61753928	G	A	0.965699	-0.0178918	0.00518306	0.0004	0.96268	-0.00933717	0.00695033	0.16	0.968742	-0.0305082	0.00778118	9.7e-05					-	-	ZNF738; CTD-2561J22.1; CTD-2561J22.2; ZNF493; CTD-2561J22.3
91	21585004	19	rs535850503	T	C	0.963703	-0.0192798	0.0050295	9.1e-05	0.960396	-0.0101044	0.0067239	0.12	0.967038	-0.0325919	0.00757734	2e-05					-	-	ZNF738; CTD-2561J22.1; CTD-2561J22.2; ZNF493; CTD-2561J22.3
92	21585020	19	rs548204248	T	C	0.963703	-0.0192798	0.0050295	9.1e-05	0.960396	-0.0101044	0.0067239	0.12	0.967038	-0.0325919	0.00757734	2e-05					-	-	ZNF738; CTD-2561J22.1; CTD-2561J22.2; ZNF493; CTD-2561J22.3
93	21610615	19	rs142465155	C	T	0.963086	-0.0180678	0.00494176	0.00019	0.959658	-0.00862891	0.00660685	0.18	0.966542	-0.0316195	0.00744502	2.5e-05	0.959658	-0.00862891	0.00660685	0.0193346	-	-	ZNF493; CTD-2561J22.3; CTD-2561J22.5
94	21614933	19	rs146803654	A	G	0.963285	-0.017684	0.00494508	0.00025	0.959873	-0.00838195	0.00661142	0.19	0.966726	-0.0311012	0.00744981	3.4e-05	0.959873	-0.00838195	0.00661142	0.0208951	-	-	ZNF493; CTD-2561J22.3; CTD-2561J22.5
95	21621704	19	rs145226191	C	T	0.962871	-0.018905	0.00493503	9.2e-05	0.959362	-0.00936603	0.00658921	0.14	0.966408	-0.0329819	0.00744627	1.1e-05	0.959362	-0.00936603	0.00658921	0.0161627	-	-	ZNF493; CTD-2561J22.3; CTD-2561J22.5
96	21623634	19	rs57705728	T	C	0.963377	-0.0175841	0.00495733	0.00029	0.960087	-0.00755859	0.00663552	0.24	0.966694	-0.0319995	0.00745803	2.1e-05					-	-	ZNF493; CTD-2561J22.3; CTD-2561J22.5
97	21658289	19	rs58259941	G	A	0.963498	-0.0185168	0.00497306	0.00014	0.96027	-0.00941895	0.00666043	0.15	0.966751	-0.0317421	0.00747664	2.5e-05					pain	Kim H, Pharmacogenomics, 2009	CTD-2561J22.3; CTD-2561J22.5; LINC00664; ZNF429
98	21728093	19	rs190946611	C	T	0.964052	-0.0176763	0.00505063	0.00036	0.961778	-0.0089917	0.0068019	0.17	0.966344	-0.0295674	0.00754408	9.9e-05	0.961778	-0.0089917	0.0068019	0.0402318	colorectal cancer, endometrial neoplasm	Cheng TH, Sci Rep, 2015	ZNF429; CTD-2561J22.6; RP11-678G14.2
99	21728535	19	rs150250301	T	A	0.953477	-0.0183242	0.00457136	4e-05	0.951154	-0.0120623	0.00617408	0.048	0.955819	-0.0280212	0.00680648	4.7e-05	0.951154	-0.0120623	0.00617408	0.0786254	colorectal cancer, endometrial neoplasm	Cheng TH, Sci Rep, 2015	ZNF429; CTD-2561J22.6; RP11-678G14.2; RP11-678G14.3
100	21768566	19	rs114532598	C	T	0.953496	-0.0183747	0.00457936	4e-05	0.951091	-0.0123536	0.00617913	0.043	0.955921	-0.0278654	0.00682546	5.5e-05	0.951091	-0.0123536	0.00617913	0.0879707	colorectal cancer, endometrial neoplasm	Cheng TH, Sci Rep, 2015	RP11-678G14.2; RP11-678G14.3; RP11-678G14.4
101	21774938	19	rs116311440	T	A	0.953484	-0.0183267	0.0045802	4.2e-05	0.951035	-0.0123901	0.00617846	0.042	0.955953	-0.02773	0.00682898	6e-05	0.951035	-0.0123901	0.00617846	0.0916234	colorectal cancer, endometrial neoplasm	Cheng TH, Sci Rep, 2015	RP11-678G14.2; RP11-678G14.3; RP11-678G14.4
102	21797898	19	rs148119357	A	C	0.955954	-0.0157027	0.00461865	0.00047	0.95499	-0.00650397	0.00631641	0.29	0.956926	-0.0273646	0.00678462	5.5e-05	0.95499	-0.00650397	0.00631641	0.0226627	-	-	RP11-678G14.4; RP11-678G14.5; RP11-420K14.1
103	21892969	19	19:21892969	C	A	0.886844	-0.0121473	0.0029795	3.5e-05	0.888147	-0.0190702	0.00415521	2.9e-06	0.885532	-0.00751398	0.00429231	0.1	0.888147	-0.0190702	0.00415521	0.0501023	systolic blood pressure; diastolic blood pressure	Kichaev G, Am J Hum Genet, 2018; Warren HR, Nat Genet, 2017	AC092364.4; RP11-420K14.3; VN1R84P; ZNF100
104	21901192	19	19:21901192	G	A	0.900431	-0.0119832	0.00315079	0.0001	0.902094	-0.0190208	0.0044121	1.1e-05	0.898753	-0.00778207	0.00452158	0.11	0.902094	-0.0190208	0.0044121	0.0715939	systolic blood pressure; diastolic blood pressure	Kichaev G, Am J Hum Genet, 2018; Warren HR, Nat Genet, 2017	AC092364.4; RP11-420K14.3; VN1R84P; ZNF100
105	21912334	19	rs141111647	A	G	0.900225	-0.0118724	0.00314265	0.00011	0.901886	-0.0190464	0.00440133	1e-05	0.89855	-0.00755064	0.00450928	0.12	0.901886	-0.0190464	0.00440133	0.06465	systolic blood pressure; rosacea severity measurement	Kichaev G, Am J Hum Genet, 2018; Aponte JL, Hum Mol Genet, 2018	RP11-420K14.3; VN1R84P; ZNF100; RP11-420K14.6; AC092364.2
106	21937453	19	19:21937453	A	T	0.886192	-0.0121968	0.00295983	2.9e-05	0.88768	-0.019241	0.00413505	2.1e-06	0.884692	-0.00742687	0.00425686	0.1	0.88768	-0.019241	0.00413505	0.0437853	diastolic blood pressure; response to antineoplastic agent; rosacea severity measurement	Evangelou E, Nat Genet, 2018; O'Donnell PH, Cancer, 2012; Aponte JL, Hum Mol Genet, 2018	ZNF100; RP11-420K14.6; AC092364.2; RP11-420K14.8
107	21938925	19	rs115415221	T	A	0.90063	-0.0116504	0.00315291	0.00016	0.902385	-0.0187807	0.00441112	1.4e-05	0.898862	-0.00718563	0.00452848	0.14	0.902385	-0.0187807	0.00441112	0.0632309	diastolic blood pressure; response to antineoplastic agent; rosacea severity measurement	Evangelou E, Nat Genet, 2018; O'Donnell PH, Cancer, 2012; Aponte JL, Hum Mol Genet, 2018	ZNF100; RP11-420K14.6; AC092364.2; RP11-420K14.8
108	21975624	19	19:21975624	T	C	0.886094	-0.0119834	0.00294155	3.4e-05	0.8892	-0.018666	0.0041376	4e-06	0.882962	-0.0076251	0.0042042	0.085	0.8892	-0.018666	0.0041376	0.0580064	response to antineoplastic agent	O'Donnell PH, Cancer, 2012	RP11-420K14.8; RP11-420K14.7; ZNF43
109	21983964	19	19:21983964	G	T	0.871029	-0.0101415	0.00278625	0.0002	0.874527	-0.0169367	0.00391794	9.9e-06	0.867502	-0.00549721	0.00398348	0.19	0.874527	-0.0169367	0.00391794	0.0381215	-	-	RP11-420K14.8; RP11-420K14.7; ZNF43
110	21984031	19	19:21984031	T	C	0.870661	-0.0103382	0.0027816	0.00015	0.874167	-0.0167209	0.00391446	1.3e-05	0.867127	-0.00599376	0.00397394	0.15	0.874167	-0.0167209	0.00391446	0.0514574	-	-	RP11-420K14.8; RP11-420K14.7; ZNF43
111	21986365	19	19:21986365	G	A	0.870975	-0.0102136	0.00277051	0.00017	0.874464	-0.016629	0.00389607	1.3e-05	0.867457	-0.0058565	0.00396071	0.16	0.874464	-0.016629	0.00389607	0.0495601	-	-	RP11-420K14.8; RP11-420K14.7; ZNF43; CTD-2607J13.1
112	21991663	19	19:21991663	A	G	0.871067	-0.0102985	0.00276633	0.00015	0.874401	-0.016566	0.00389047	1.3e-05	0.867705	-0.00602822	0.00395441	0.15	0.874401	-0.016566	0.00389047	0.054371	-	-	RP11-420K14.8; RP11-420K14.7; ZNF43; CTD-2607J13.1
113	21994352	19	rs8111812	A	C	0.869448	-0.00994078	0.00275299	0.00022	0.872786	-0.016424	0.00386754	1.4e-05	0.866084	-0.00561168	0.00393928	0.18					-	-	RP11-420K14.8; RP11-420K14.7; ZNF43; CTD-2607J13.1
114	21994386	19	rs8100594	A	T	0.871922	-0.00973263	0.00276466	0.00032	0.875334	-0.0156099	0.00388599	3.9e-05	0.868481	-0.00593204	0.00395404	0.15					-	-	RP11-420K14.8; RP11-420K14.7; ZNF43; CTD-2607J13.1
115	21996939	19	rs7247976	A	C	0.870123	-0.0101513	0.00275144	0.00016	0.873309	-0.015436	0.00386373	4.3e-05	0.86691	-0.0068108	0.00393854	0.098					-	-	RP11-420K14.8; RP11-420K14.7; ZNF43; CTD-2607J13.1
116	22001166	19	rs7250566	G	C	0.870113	-0.0101669	0.00275149	0.00016	0.873284	-0.0153439	0.00386422	4.7e-05	0.866917	-0.00690354	0.00393819	0.093					-	-	RP11-420K14.8; RP11-420K14.7; ZNF43; CTD-2607J13.1
117	22008201	19	rs112483493	T	C	0.870341	-0.0101977	0.00275158	0.00015	0.873625	-0.0154773	0.00386381	4.1e-05	0.867031	-0.00686109	0.00393888	0.096	0.873625	-0.0154773	0.00386381	0.113756	-	-	RP11-420K14.7; ZNF43; CTD-2607J13.1
118	22025062	19	rs11882852	T	G	0.870978	-0.0100026	0.0027569	0.00021	0.874407	-0.015686	0.00387539	3.4e-05	0.867521	-0.00635051	0.00394267	0.12	0.874407	-0.015686	0.00387539	0.0872273	macrophage migration inhibitory factor measurement	Ahola-Olli AV, Am J Hum Genet, 2016	ZNF43; CTD-2607J13.1
119	22027481	19	rs61439061	T	C	0.871301	-0.0101152	0.00276217	0.00018	0.87471	-0.0158287	0.00388497	3e-05	0.867864	-0.00643283	0.00394815	0.12					macrophage migration inhibitory factor measurement	Ahola-Olli AV, Am J Hum Genet, 2016	ZNF43; CTD-2607J13.1
120	22028560	19	rs11881809	T	A	0.870921	-0.00996923	0.00275651	0.00022	0.874319	-0.0156155	0.00387511	3.6e-05	0.867496	-0.00634204	0.00394184	0.12	0.874319	-0.0156155	0.00387511	0.0893027	macrophage migration inhibitory factor measurement	Ahola-Olli AV, Am J Hum Genet, 2016	ZNF43; CTD-2607J13.1
121	22029700	19	rs11879721	G	A	0.871421	-0.0103038	0.0027567	0.00013	0.87459	-0.0158702	0.00387006	2.6e-05	0.868227	-0.00669425	0.00394705	0.1	0.87459	-0.0158702	0.00387006	0.0927307	macrophage migration inhibitory factor measurement	Ahola-Olli AV, Am J Hum Genet, 2016	ZNF43; CTD-2607J13.1
122	22030236	19	rs34388517	C	A	0.871041	-0.0100369	0.00275642	0.0002	0.874483	-0.0157637	0.00387337	3e-05	0.867572	-0.00634859	0.00394325	0.12					macrophage migration inhibitory factor measurement	Ahola-Olli AV, Am J Hum Genet, 2016	ZNF43; CTD-2607J13.1
123	22032222	19	rs139888333	G	A	0.876964	-0.0103253	0.0028305	0.0002	0.880255	-0.0159738	0.00397573	4e-05	0.873645	-0.0068271	0.00405085	0.11	0.880255	-0.0159738	0.00397573	0.102662	macrophage migration inhibitory factor measurement	Ahola-Olli AV, Am J Hum Genet, 2016	ZNF43; CTD-2607J13.1
124	22033346	19	rs111576368	G	A	0.876964	-0.0103253	0.0028305	0.0002	0.880255	-0.0159738	0.00397573	4e-05	0.873645	-0.0068271	0.00405085	0.11	0.880255	-0.0159738	0.00397573	0.102662	macrophage migration inhibitory factor measurement	Ahola-Olli AV, Am J Hum Genet, 2016	ZNF43; CTD-2607J13.1
125	22034100	19	rs113227845	C	T	0.876777	-0.0108529	0.00284307	9.9e-05	0.880318	-0.0161336	0.0039924	3.6e-05	0.873207	-0.00769736	0.00406991	0.068	0.880318	-0.0161336	0.0039924	0.133968	macrophage migration inhibitory factor measurement	Ahola-Olli AV, Am J Hum Genet, 2016	ZNF43; CTD-2607J13.1
126	22034275	19	rs111526336	G	C	0.876773	-0.0108509	0.00284308	0.0001	0.880312	-0.0161295	0.00399245	3.6e-05	0.873207	-0.00769736	0.00406991	0.068	0.880312	-0.0161295	0.00399245	0.13416	macrophage migration inhibitory factor measurement	Ahola-Olli AV, Am J Hum Genet, 2016	ZNF43; CTD-2607J13.1
127	22037976	19	rs111308237	C	G	0.876134	-0.0109241	0.00285695	9.7e-05	0.879933	-0.0167816	0.00401274	1.9e-05	0.872303	-0.00727804	0.00408913	0.086	0.879933	-0.0167816	0.00401274	0.0929578	macrophage migration inhibitory factor measurement	Ahola-Olli AV, Am J Hum Genet, 2016	ZNF43
128	22040292	19	rs112980352	T	G	0.870858	-0.0107475	0.00284544	0.00012	0.874123	-0.0160235	0.0039851	4e-05	0.867566	-0.00724116	0.00408336	0.088	0.874123	-0.0160235	0.0039851	0.119024	macrophage migration inhibitory factor measurement	Ahola-Olli AV, Am J Hum Genet, 2016	ZNF43
129	23059262	19	rs35706770	T	C	0.636559	0.00447229	0.00190993	0.021	0.628817	-0.00094784	0.00260296	0.69	0.644365	0.0110957	0.00281709	6e-05					Bronchopulmonary dysplasia	Wang H, Pediatrics, 2013	ZNF723; VN1R88P
130	23060012	19	rs11882498	C	T	0.636211	0.00445673	0.00191023	0.021	0.62828	-0.000978762	0.0026036	0.68	0.644206	0.011103	0.00281736	6e-05	0.62828	-0.000978762	0.0026036	0.00142502	Bronchopulmonary dysplasia	Wang H, Pediatrics, 2013	ZNF723; VN1R88P
131	23060411	19	rs62120828	A	G	0.635093	0.00445534	0.00191005	0.021	0.62765	-0.00105984	0.00260344	0.66	0.642597	0.0111851	0.00281682	5.4e-05					Bronchopulmonary dysplasia	Wang H, Pediatrics, 2013	ZNF723; VN1R88P
132	23060720	19	rs34629498	C	T	0.635027	0.00470287	0.00191393	0.015	0.627303	-0.000542163	0.00260913	0.81	0.642814	0.0110583	0.00282219	6.6e-05					Bronchopulmonary dysplasia	Wang H, Pediatrics, 2013	ZNF723; VN1R88P
133	23064264	19	rs62120832	A	G	0.635277	0.00479616	0.001915	0.013	0.627435	-0.000331688	0.00260969	0.87	0.643182	0.0110069	0.00282482	7.3e-05					Bronchopulmonary dysplasia	Wang H, Pediatrics, 2013	ZNF723; VN1R88P
134	29931553	19	rs192731209	A	G	0.973543	0.0242601	0.00638394	0.00014	0.974066	0.0114108	0.00889909	0.2	0.973016	0.0373555	0.00920059	5.8e-05	0.974066	0.0114108	0.00889909	0.040094	C-reactive protein measurement; fasting blood glucose measurement	Comuzzie AG, PLoS One, 2012	CTC-525D6.1; CTC-525D6.5
135	29935374	19	rs73923825	T	C	0.725868	-0.00825685	0.00209491	9.2e-05	0.732299	-0.0116939	0.00291424	5.8e-05	0.719384	-0.00542735	0.00302638	0.056					C-reactive protein measurement	Comuzzie AG, PLoS One, 2012	CTC-525D6.1; CTC-525D6.5
136	29942463	19	rs4805407	C	T	0.473917	0.00734117	0.00186255	9.5e-05	0.468584	0.00943084	0.00256672	0.00025	0.479293	0.00580985	0.0027153	0.029					-	-	CTC-525D6.1; CTC-525D6.5
137	29943322	19	rs8105326	G	A	0.408874	0.00671989	0.0019122	0.00048	0.409904	0.0105727	0.00264638	7.4e-05	0.407835	0.00345992	0.00277528	0.23					-	-	CTC-525D6.1; CTC-525D6.5
138	30394856	19	rs9630879	A	G	0.725931	0.00870356	0.00207563	2.9e-05	0.720666	0.00915718	0.00284599	0.0014	0.731239	0.00865456	0.0030416	0.0029					mathematical ability; urate measurement, chronic kidney disease	Lee JJ, Nat Genet, 2018; Jing J, Sci Rep, 2018	CTD-2057D4.2; CTC-448F2.3; URI1
139	31858036	19	rs80107900	T	C	0.974557	-0.0219024	0.0059826	0.00024	0.97635	-0.0353797	0.0085143	3.3e-05	0.972749	-0.0123297	0.00846088	0.13					FEV/FEC ratio; risk-taking behaviour; forced expiratory volume, response to bronchodilator, chronic obstructive pulmonary disease; intelligence	Wyss AB, Nat Commun, 2018; Karlsson Linner R, Nat Genet, 2019; Lutz SM, BMC Genet, 2015; Savage JE, Nat Genet, 2018	TSHZ3; AC007796.1
140	33976555	19	rs17761078	A	G	0.883266	0.00170684	0.00287232	0.58	0.882791	0.0133986	0.00393677	0.00084	0.883745	-0.00973369	0.00420962	0.023	0.882791	0.0133986	0.00393677	4.81004e-05	body fat percentage; body mass index; smoking status measurement	Hubel C, Am J Med Genet B Neuropsychiatr Genet, 2018; Kichaev G, Am J Hum Genet, 2018; Liu M, Nat Genet, 2019	PEPD
141	36082053	19	rs147129462	T	C	0.988716	-0.0364467	0.00903805	6.2e-05	0.988374	-0.0327416	0.0122155	0.0076	0.989061	-0.0386695	0.0134433	0.0034	0.988374	-0.0327416	0.0122155	0.741023	-	-	AC002115.5; AC002115.9; HAUS5
142	36086748	19	rs139681712	G	A	0.988061	-0.036236	0.00881341	4.5e-05	0.9878	-0.0316746	0.0119756	0.0082	0.988324	-0.0389976	0.0130341	0.0025	0.9878	-0.0316746	0.0119756	0.675226	-	-	AC002115.5; AC002115.9; HAUS5
143	36090748	19	rs114609369	G	A	0.988035	-0.0352041	0.00872579	6.2e-05	0.987781	-0.0304367	0.0118947	0.011	0.988292	-0.0382532	0.0128608	0.0026	0.987781	-0.0304367	0.0118947	0.651357	-	-	AC002115.5; AC002115.9; HAUS5
144	36091057	19	rs185917147	C	T	0.988035	-0.0352041	0.00872579	6.2e-05	0.987781	-0.0304367	0.0118947	0.011	0.988292	-0.0382532	0.0128608	0.0026	0.987781	-0.0304367	0.0118947	0.651357	-	-	AC002115.5; AC002115.9; HAUS5
145	36091542	19	rs116532205	G	A	0.988035	-0.0352041	0.00872579	6.2e-05	0.987781	-0.0304367	0.0118947	0.011	0.988292	-0.0382532	0.0128608	0.0026	0.987781	-0.0304367	0.0118947	0.651357	-	-	AC002115.5; AC002115.9; HAUS5
146	36092489	19	rs115591423	A	G	0.987969	-0.0351183	0.00871733	6.3e-05	0.98773	-0.0301695	0.0118902	0.011	0.988209	-0.0383946	0.0128404	0.0025	0.98773	-0.0301695	0.0118902	0.634082	-	-	AC002115.5; AC002115.9; HAUS5
147	36094276	19	rs116658603	G	T	0.988016	-0.0350924	0.00871892	6.5e-05	0.987781	-0.0301471	0.0118934	0.011	0.988254	-0.0382839	0.0128415	0.0026	0.987781	-0.0301471	0.0118934	0.637784	-	-	AC002115.5; AC002115.9; HAUS5
148	36098133	19	rs150476716	G	T	0.987896	-0.035544	0.00869695	5e-05	0.98761	-0.0310433	0.0118563	0.0088	0.988184	-0.0381625	0.0128172	0.0026	0.98761	-0.0310433	0.0118563	0.679654	-	-	AC002115.5; AC002115.9; HAUS5; RBM42
149	36101791	19	rs114901615	C	A	0.987867	-0.0357506	0.00869801	4.5e-05	0.987547	-0.0310835	0.0118323	0.0086	0.98819	-0.0385218	0.0128479	0.0024	0.987547	-0.0310835	0.0118323	0.66626	-	-	AC002115.5; AC002115.9; HAUS5; RBM42
150	36103460	19	rs8106440	G	C	0.988485	-0.0361107	0.00889058	5.4e-05	0.988147	-0.0336507	0.0120662	0.0054	0.988826	-0.0368915	0.0131648	0.0044					-	-	AC002115.5; AC002115.9; HAUS5; RBM42
151	36106353	19	rs114690856	C	T	0.98833	-0.035813	0.00880133	5.2e-05	0.987951	-0.033271	0.0119341	0.0054	0.988712	-0.0365234	0.0130456	0.0044	0.987951	-0.033271	0.0119341	0.852216	-	-	AC002115.5; AC002115.9; HAUS5; RBM42
152	36111168	19	rs61738561	C	A	0.98813	-0.0365898	0.00877393	3.4e-05	0.987755	-0.0323192	0.0119268	0.0069	0.988508	-0.0391131	0.0129703	0.0022					-	-	AC002115.5; AC002115.9; HAUS5; RBM42; ETV2
153	36116590	19	rs114650822	T	C	0.988241	-0.0367847	0.00877234	3e-05	0.98785	-0.032852	0.0118749	0.0058	0.988635	-0.0392012	0.0130261	0.0023	0.98785	-0.032852	0.0118749	0.715268	-	-	AC002115.5; AC002115.9; HAUS5; RBM42; ETV2; COX6B1
154	36126946	19	rs539838848	G	T	0.988327	-0.037695	0.00883486	2.2e-05	0.98792	-0.0336306	0.0119376	0.005	0.988737	-0.0403265	0.0131451	0.0019					-	-	AC002115.9; HAUS5; RBM42; ETV2; COX6B1
155	36131797	19	rs115399719	C	G	0.986572	-0.0358765	0.00827764	1.7e-05	0.98645	-0.0327398	0.0113554	0.0042	0.986695	-0.0371782	0.0121205	0.0018	0.98645	-0.0327398	0.0113554	0.786669	-	-	HAUS5; RBM42; ETV2; COX6B1; RN7SL765P
156	36132761	19	rs114346731	C	A	0.986566	-0.0358809	0.00827406	1.6e-05	0.986437	-0.0327394	0.0113457	0.0042	0.986695	-0.0371782	0.0121205	0.0018	0.986437	-0.0327394	0.0113457	0.786567	-	-	HAUS5; RBM42; ETV2; COX6B1; RN7SL765P; UPK1A
157	36134549	19	rs116092459	C	T	0.975633	-0.0167508	0.00670078	0.012	0.980627	0.0148342	0.0103644	0.16	0.970599	-0.0355922	0.00890851	2.9e-05	0.980627	0.0148342	0.0103644	0.000186762	-	-	HAUS5; RBM42; ETV2; COX6B1; RN7SL765P; UPK1A; UPK1A-AS1
158	36135268	19	rs375155035	C	G	0.986461	-0.0359236	0.00826017	1.6e-05	0.986368	-0.032463	0.0113383	0.0045	0.986556	-0.0375307	0.0120874	0.0016					-	-	HAUS5; RBM42; ETV2; COX6B1; RN7SL765P; UPK1A; UPK1A-AS1
159	36143990	19	rs7256069	C	T	0.981632	-0.0286533	0.00716939	7.6e-05	0.981144	-0.0237703	0.00980706	0.016	0.982123	-0.0320121	0.0105289	0.0022					-	-	RBM42; ETV2; COX6B1; RN7SL765P; UPK1A; UPK1A-AS1
160	36159533	19	rs61730228	C	T	0.987798	-0.0394022	0.0086875	6.2e-06	0.9872	-0.035267	0.0116358	0.0025	0.9884	-0.0437506	0.0130528	0.00071					-	-	ETV2; COX6B1; RN7SL765P; UPK1A; UPK1A-AS1; AC002314.4
161	36176390	19	rs115933593	G	A	0.987757	-0.0393361	0.0087007	6.5e-06	0.986973	-0.0346855	0.0116163	0.0029	0.988546	-0.0444936	0.013121	0.00062	0.986973	-0.0346855	0.0116163	0.570861	age at menarche	Kichaev G, Am J Hum Genet, 2018	RN7SL765P; UPK1A; UPK1A-AS1; AC002314.4; ZBTB32
162	36199274	19	rs114237808	G	A	0.98452	-0.0311187	0.00777349	7e-05	0.983642	-0.0240434	0.0104265	0.022	0.985404	-0.0371741	0.0116613	0.0013	0.983642	-0.0240434	0.0104265	0.39529	age at menarche; red blood cell distribution width	Kichaev G, Am J Hum Genet, 2018	AC002314.4; ZBTB32; KMT2B
163	36210627	19	rs114140622	G	A	0.987947	-0.039805	0.00873416	5.5e-06	0.987207	-0.0353629	0.0116614	0.0025	0.988692	-0.0446979	0.0131707	0.00061	0.987207	-0.0353629	0.0116614	0.591001	red blood cell distribution width; blood protein measurement	Kichaev G, Am J Hum Genet, 2018; Sun BB, Nature, 2018	ZBTB32; KMT2B; IGFLR1; AD000671.6; U2AF1L4
164	36221232	19	rs114427608	C	T	0.984346	-0.0336229	0.00773982	1.6e-05	0.983687	-0.0273785	0.0104304	0.0091	0.98501	-0.0393532	0.0115496	0.00056	0.983687	-0.0273785	0.0104304	0.435836	self reported educational attainment; red blood cell distribution width; mathematical ability; blood protein measurement	Lee JJ, Nat Genet, 2018; Kichaev G, Am J Hum Genet, 2018; Sun BB, Nature, 2018; Emilsson V, Science, 2018	ZBTB32; KMT2B; IGFLR1; AD000671.6; U2AF1L4; PSENEN; AC002398.9; AC002398.11; LIN37; AC002398.12; HSPB6
165	36221353	19	rs34980546	C	T	0.983924	-0.0316232	0.00753638	3.2e-05	0.983327	-0.024965	0.0102174	0.015	0.984527	-0.0374847	0.0111727	0.00068					self reported educational attainment; red blood cell distribution width; mathematical ability; blood protein measurement	Lee JJ, Nat Genet, 2018; Kichaev G, Am J Hum Genet, 2018; Sun BB, Nature, 2018; Emilsson V, Science, 2018	ZBTB32; KMT2B; IGFLR1; AD000671.6; U2AF1L4; PSENEN; AC002398.9; AC002398.11; LIN37; AC002398.12; HSPB6
166	36232175	19	rs77798499	G	A	0.984992	-0.0337642	0.00958584	0.00048	0.987358	0.0022889	0.0150531	0.88	0.982606	-0.0530427	0.0126055	1.2e-05					self reported educational attainment; red blood cell distribution width; mathematical ability; blood protein measurement	Lee JJ, Nat Genet, 2018; Kichaev G, Am J Hum Genet, 2018; Sun BB, Nature, 2018; Emilsson V, Science, 2018	ZBTB32; KMT2B; IGFLR1; AD000671.6; U2AF1L4; PSENEN; AC002398.9; AC002398.11; LIN37; AC002398.12; HSPB6; C19orf55
167	36241673	19	rs140186262	C	G	0.987988	-0.0399704	0.00875041	5.2e-06	0.987175	-0.0357442	0.0116578	0.0022	0.988807	-0.0446549	0.0132284	0.00066	0.987175	-0.0357442	0.0116578	0.608813	self reported educational attainment; mathematical ability; blood protein measurement	Lee JJ, Nat Genet, 2018; Kichaev G, Am J Hum Genet, 2018; Sun BB, Nature, 2018; Emilsson V, Science, 2018	KMT2B; IGFLR1; AD000671.6; U2AF1L4; PSENEN; AC002398.9; AC002398.11; LIN37; AC002398.12; HSPB6; C19orf55; AC002398.13; ARHGAP33
168	36248686	19	19:36248686	C	G	0.987962	-0.0403562	0.00874748	4.2e-06	0.987125	-0.0363508	0.0116506	0.0018	0.988807	-0.0446549	0.0132284	0.00066	0.987125	-0.0363508	0.0116506	0.633321	self reported educational attainment; urinary albumin to creatinine ratio; mathematical ability; blood protein measurement	Lee JJ, Nat Genet, 2018; Kichaev G, Am J Hum Genet, 2018; Teumer A, Diabetes, 2015; Sun BB, Nature, 2018; Emilsson V, Science, 2018	KMT2B; IGFLR1; AD000671.6; U2AF1L4; PSENEN; AC002398.9; AC002398.11; LIN37; AC002398.12; HSPB6; C19orf55; AC002398.13; ARHGAP33
169	36249685	19	rs148747066	C	A	0.98521	-0.0321559	0.00788618	5.2e-05	0.984519	-0.0257696	0.0106268	0.016	0.985907	-0.0373722	0.011769	0.0014	0.984519	-0.0257696	0.0106268	0.458688	self reported educational attainment; urinary albumin to creatinine ratio; mathematical ability; blood protein measurement	Lee JJ, Nat Genet, 2018; Kichaev G, Am J Hum Genet, 2018; Teumer A, Diabetes, 2015; Sun BB, Nature, 2018; Emilsson V, Science, 2018	KMT2B; IGFLR1; AD000671.6; U2AF1L4; PSENEN; AC002398.9; AC002398.11; LIN37; AC002398.12; HSPB6; C19orf55; AC002398.13; ARHGAP33
170	36249703	19	rs142143037	G	A	0.98521	-0.0321559	0.00788618	5.2e-05	0.984519	-0.0257696	0.0106268	0.016	0.985907	-0.0373722	0.011769	0.0014	0.984519	-0.0257696	0.0106268	0.458688	self reported educational attainment; urinary albumin to creatinine ratio; mathematical ability; blood protein measurement	Lee JJ, Nat Genet, 2018; Kichaev G, Am J Hum Genet, 2018; Teumer A, Diabetes, 2015; Sun BB, Nature, 2018; Emilsson V, Science, 2018	KMT2B; IGFLR1; AD000671.6; U2AF1L4; PSENEN; AC002398.9; AC002398.11; LIN37; AC002398.12; HSPB6; C19orf55; AC002398.13; ARHGAP33
171	36262466	19	rs150789148	G	A	0.985353	-0.0327027	0.00797178	4.5e-05	0.985125	-0.0271285	0.010882	0.013	0.985583	-0.0370504	0.0117323	0.0015	0.985125	-0.0271285	0.010882	0.530044	self reported educational attainment; urinary albumin to creatinine ratio; blood protein measurement	Lee JJ, Nat Genet, 2018; Kichaev G, Am J Hum Genet, 2018; Teumer A, Diabetes, 2015; Sun BB, Nature, 2018; Emilsson V, Science, 2018	PSENEN; AC002398.9; AC002398.11; LIN37; AC002398.12; HSPB6; C19orf55; AC002398.13; ARHGAP33; AC002398.5
172	36265723	19	rs115323422	G	A	0.985343	-0.0326606	0.007973	4.6e-05	0.985131	-0.0268417	0.0108965	0.014	0.985557	-0.0371718	0.0117197	0.0014	0.985131	-0.0268417	0.0108965	0.513274	self reported educational attainment; urinary albumin to creatinine ratio; blood protein measurement	Lee JJ, Nat Genet, 2018; Kichaev G, Am J Hum Genet, 2018; Teumer A, Diabetes, 2015; Sun BB, Nature, 2018	AC002398.9; AC002398.11; LIN37; AC002398.12; HSPB6; C19orf55; AC002398.13; ARHGAP33; AC002398.5
173	36271004	19	19:36271004	G	A	0.987684	-0.0373973	0.00876059	2.1e-05	0.9872	-0.03325	0.0117534	0.0048	0.988171	-0.0415157	0.0131376	0.0014	0.9872	-0.03325	0.0117534	0.634891	self reported educational attainment; urinary albumin to creatinine ratio; blood protein measurement	Kichaev G, Am J Hum Genet, 2018; Teumer A, Diabetes, 2015; Sun BB, Nature, 2018	AC002398.12; HSPB6; C19orf55; AC002398.13; ARHGAP33; AC002398.5; PRODH2
174	36280209	19	rs572145347	G	T	0.987722	-0.0378429	0.00883861	2e-05	0.987049	-0.0358408	0.0118042	0.0025	0.9884	-0.0404828	0.0133237	0.0022					urinary albumin to creatinine ratio	Teumer A, Diabetes, 2015	C19orf55; AC002398.13; ARHGAP33; AC002398.5; PRODH2
175	36298085	19	rs3761086	A	G	0.984469	-0.0344648	0.00779527	1.3e-05	0.984513	-0.0345636	0.0107814	0.0015	0.984425	-0.0339246	0.0113207	0.0024					-	-	ARHGAP33; AC002398.5; PRODH2; NPHS1
176	36300629	19	rs377651884	G	A									0.988082	-0.048877	0.0129408	7.4e-05					-	-	ARHGAP33; AC002398.5; PRODH2; NPHS1
177	36396681	19	rs111480245	C	G	0.947732	-0.0102631	0.00414892	0.015	0.953911	0.00254052	0.00605437	0.67	0.941503	-0.0209213	0.00575108	9.5e-05	0.953911	0.00254052	0.00605437	0.00443438	-	-	RN7SL402P; NFKBID; HCST; TYROBP
178	36400736	19	rs79786712	C	T	0.956774	-0.0153034	0.00457074	0.00091	0.962421	-0.00443635	0.00672871	0.52	0.951081	-0.0230825	0.00629172	7.2e-05					-	-	NFKBID; HCST; TYROBP
179	36411490	19	rs111955028	G	A	0.944689	-0.0132417	0.00409305	0.0013	0.950625	-0.00223352	0.00594987	0.7	0.938705	-0.0219605	0.00569067	3.3e-05	0.950625	-0.00223352	0.00594987	0.0152401	-	-	NFKBID; HCST; TYROBP; LRFN3
180	36412143	19	rs111848120	G	T	0.954408	-0.0142523	0.00445734	0.0015	0.960648	-0.0026939	0.00656466	0.69	0.948118	-0.0226759	0.00613487	5.3e-05	0.960648	-0.0026939	0.00656466	0.0243061	-	-	NFKBID; HCST; TYROBP; LRFN3
181	36417639	19	rs112324969	G	T	0.983994	-0.0228803	0.00761193	0.0027	0.987964	0.00498098	0.0119025	0.67	0.979992	-0.0410357	0.0100445	1.1e-05	0.987964	0.00498098	0.0119025	0.00277305	-	-	NFKBID; HCST; TYROBP; LRFN3; AF038458.3
182	36429628	19	rs112223886	C	A	0.981676	-0.0234846	0.00713044	0.00099	0.986721	0.00201499	0.0113959	0.85	0.97659	-0.0386361	0.00928966	6.9e-06	0.986721	0.00201499	0.0113959	0.00511838	-	-	LRFN3; AF038458.3; AF038458.4; AF038458.5
183	36826023	19	rs149345339	G	A	0.962224	0.0198606	0.00496482	5.1e-05	0.959286	0.0118948	0.00658141	0.061	0.965187	0.0310452	0.00755263	5.6e-05	0.959286	0.0118948	0.00658141	0.0528903	serum alanine aminotransferase measurement, response to combination chemotherapy, acute lymphoblastic leukemia	Liu Y, Clin Pharmacol Ther, 2017	CTD-3162L10.1; LINC00665; AC092296.1; ZFP14
184	36832947	19	rs57472603	C	T	0.964435	0.0195665	0.00506779	9.5e-05	0.961683	0.0124043	0.00672055	0.057	0.967209	0.0299902	0.00770535	0.00013					serum alanine aminotransferase measurement, response to combination chemotherapy, acute lymphoblastic leukemia	Liu Y, Clin Pharmacol Ther, 2017	LINC00665; AC092296.1; ZFP14
185	36835510	19	rs114280252	C	A	0.964441	0.019545	0.00506775	9.7e-05	0.961702	0.0123216	0.00672037	0.059	0.967203	0.0300425	0.00770541	0.00013	0.961702	0.0123216	0.00672037	0.0792349	serum alanine aminotransferase measurement, response to combination chemotherapy, acute lymphoblastic leukemia	Liu Y, Clin Pharmacol Ther, 2017	LINC00665; AC092296.1; ZFP14
186	36845203	19	rs59201093	G	A	0.96447	0.0195672	0.00506963	9.6e-05	0.96174	0.0124342	0.00672261	0.057	0.967222	0.0299491	0.00770859	0.00014					serum alanine aminotransferase measurement, response to combination chemotherapy, acute lymphoblastic leukemia	Liu Y, Clin Pharmacol Ther, 2017	LINC00665; AC092296.1; ZFP14; CTD-3162L10.3; CTD-3162L10.4
187	36865404	19	rs193277208	A	G	0.964403	0.0195231	0.00505535	9.5e-05	0.961645	0.0124649	0.00669796	0.055	0.967184	0.0299363	0.00769468	0.00014	0.961645	0.0124649	0.00669796	0.0828658	proliferative diabetic retinopathy; vital capacity	Pollack S, Diabetes, 2018; Shrine N, Nat Genet, 2019	ZFP14; CTD-3162L10.3; CTD-3162L10.4; ZFP82
188	36869223	19	rs116775339	A	G	0.96435	0.0194766	0.00505473	9.8e-05	0.961582	0.0124584	0.0066965	0.055	0.967139	0.0298883	0.00769466	0.00014	0.961582	0.0124584	0.0066965	0.0835696	proliferative diabetic retinopathy; vital capacity	Pollack S, Diabetes, 2018; Shrine N, Nat Genet, 2019	ZFP14; CTD-3162L10.3; CTD-3162L10.4; ZFP82
189	40865895	19	rs28407044	C	G	0.892504	-0.0119984	0.00308264	9.7e-05	0.893111	-0.0116635	0.00424954	0.0065	0.891891	-0.0138975	0.00449147	0.0017					red blood cell distribution width	Kichaev G, Am J Hum Genet, 2018	C19orf47; Y_RNA; PLD3; HIPK4
190	40881472	19	rs113973835	G	A	0.877217	-0.00652872	0.0028619	0.02	0.8818	-0.0165485	0.00403396	4.2e-05	0.872596	0.00182789	0.00408329	0.69	0.8818	-0.0165485	0.00403396	0.00118515	-	-	PLD3; HIPK4; PRX
191	40882486	19	rs3745200	C	G	0.875918	-0.00670267	0.00286083	0.017	0.880015	-0.015936	0.00402822	7.8e-05	0.871788	0.000980085	0.0040854	0.85					-	-	PLD3; HIPK4; PRX
192	42163215	19	19:42163215	A	G	0.956176	-0.00756815	0.00459068	0.091	0.957829	-0.0254747	0.00644022	6.2e-05	0.954509	0.00833699	0.00657701	0.18	0.957829	-0.0254747	0.00644022	0.000199169	-	-	DNAJC19P3; AC005626.3; AC005794.1; CEACAM7
193	42170263	19	19:42170263	G	A	0.956176	-0.00756815	0.00459068	0.091	0.957829	-0.0254747	0.00644022	6.2e-05	0.954509	0.00833699	0.00657701	0.18	0.957829	-0.0254747	0.00644022	0.000199169	-	-	DNAJC19P3; AC005626.3; AC005794.1; CEACAM7
194	44308278	19	rs10401526	C	G	0.947846	0.00569153	0.00420977	0.18	0.948801	0.0231912	0.00581919	5.6e-05	0.946884	-0.0101888	0.00611724	0.094	0.948801	0.0231912	0.00581919	6.22721e-05	estrogen-receptor negative breast cancer; breast carcinoma; reading	Milne RL, Nat Genet, 2017; Michailidou K, Nat Genet, 2015; Michailidou K, Nature, 2017; Michailidou K, Nat Genet, 2013; Davis OS, Nat Commun, 2014	KCNN4; AC115522.3; LYPD5; ZNF283
195	44308298	19	rs10402032	G	C	0.947587	0.00583837	0.00419459	0.17	0.948536	0.0234825	0.0058048	4.3e-05	0.946629	-0.010174	0.00608831	0.092	0.948536	0.0234825	0.0058048	5.07771e-05	estrogen-receptor negative breast cancer; breast carcinoma; reading	Milne RL, Nat Genet, 2017; Michailidou K, Nat Genet, 2015; Michailidou K, Nature, 2017; Michailidou K, Nat Genet, 2013; Davis OS, Nat Commun, 2014	KCNN4; AC115522.3; LYPD5; ZNF283
196	44308406	19	rs531471	T	C	0.947492	0.00585808	0.00418796	0.16	0.948404	0.0234295	0.00579181	4.3e-05	0.946572	-0.0101274	0.00608264	0.094					estrogen-receptor negative breast cancer; breast carcinoma; reading	Milne RL, Nat Genet, 2017; Michailidou K, Nat Genet, 2015; Michailidou K, Nature, 2017; Michailidou K, Nat Genet, 2013; Davis OS, Nat Commun, 2014	KCNN4; AC115522.3; LYPD5; ZNF283
197	44308438	19	rs492101	G	A	0.94753	0.00586968	0.00419491	0.16	0.948473	0.0234544	0.00580531	4.4e-05	0.946578	-0.010109	0.0060887	0.094					estrogen-receptor negative breast cancer; breast carcinoma; reading	Milne RL, Nat Genet, 2017; Michailidou K, Nat Genet, 2015; Michailidou K, Nature, 2017; Michailidou K, Nat Genet, 2013; Davis OS, Nat Commun, 2014	KCNN4; AC115522.3; LYPD5; ZNF283
198	44308440	19	rs492099	A	G	0.94753	0.00586968	0.00419491	0.16	0.948473	0.0234544	0.00580531	4.4e-05	0.946578	-0.010109	0.0060887	0.094					estrogen-receptor negative breast cancer; breast carcinoma; reading	Milne RL, Nat Genet, 2017; Michailidou K, Nat Genet, 2015; Michailidou K, Nature, 2017; Michailidou K, Nat Genet, 2013; Davis OS, Nat Commun, 2014	KCNN4; AC115522.3; LYPD5; ZNF283
199	47146969	19	rs8113318	T	A	0.782886	-0.00986223	0.00237565	4.2e-05	0.786866	-0.00826069	0.00326427	0.012	0.778873	-0.011821	0.00347347	0.00046					open-angle glaucoma; ulcerative colitis	Vishal M, BMC Med Genomics, 2016; Jostins L, Nature, 2012	PTGIR; GNG8; DACT3; DACT3-AS1
200	48936942	19	rs80038044	A	T	0.900076	0.0120603	0.00311155	9.7e-05	0.900101	0.0134717	0.00425297	0.0017	0.900051	0.012145	0.00457316	0.008					endometriosis	Sobalska-Kwapis M, Eur J Obstet Gynecol Reprod Biol, 2017	GRIN2D; GRWD1; KCNJ14
201	48960000	19	rs80004940	C	A	0.904215	0.0123443	0.00317936	8.3e-05	0.903703	0.0127881	0.00435657	0.0034	0.904732	0.0132913	0.00466078	0.004					-	-	GRIN2D; GRWD1; KCNJ14; CTC-273B12.5; CTC-273B12.7; CTC-273B12.6; CYTH2; CTC-273B12.8
202	48960048	19	rs115357234	G	A	0.904215	0.0123443	0.00317936	8.3e-05	0.903703	0.0127881	0.00435657	0.0034	0.904732	0.0132913	0.00466078	0.004	0.903703	0.0127881	0.00435657	0.936334	-	-	GRIN2D; GRWD1; KCNJ14; CTC-273B12.5; CTC-273B12.7; CTC-273B12.6; CYTH2; CTC-273B12.8
203	48976741	19	rs74699109	A	G	0.888805	0.0119113	0.00296698	5e-05	0.888102	0.0117108	0.00406079	0.0039	0.889513	0.0137487	0.00435469	0.0018					-	-	GRWD1; KCNJ14; CTC-273B12.5; CTC-273B12.7; CTC-273B12.6; CYTH2; CTC-273B12.8; LMTK3
204	48976969	19	rs79385411	A	G	0.903385	0.0125813	0.00315155	5.2e-05	0.903261	0.0136956	0.00431749	0.0015	0.903511	0.0131668	0.00462102	0.0043					-	-	GRWD1; KCNJ14; CTC-273B12.5; CTC-273B12.7; CTC-273B12.6; CYTH2; CTC-273B12.8; LMTK3
205	48978817	19	rs114310617	A	G	0.90813	0.0129695	0.00327735	5.9e-05	0.907078	0.015164	0.00446814	0.00067	0.90919	0.0116945	0.00482986	0.015	0.907078	0.015164	0.00446814	0.593326	-	-	GRWD1; KCNJ14; CTC-273B12.5; CTC-273B12.7; CTC-273B12.6; CYTH2; CTC-273B12.8; LMTK3
206	48994898	19	rs79272013	T	C	0.899797	0.0120845	0.00313498	9.3e-05	0.899029	0.014345	0.00426729	0.00084	0.900572	0.0109564	0.00462768	0.016					-	-	CTC-273B12.5; CTC-273B12.7; CTC-273B12.6; CYTH2; CTC-273B12.8; LMTK3; CTC-273B12.10
207	48995432	19	rs75055121	T	C	0.899107	0.012088	0.00312619	8.8e-05	0.898398	0.0141388	0.00425661	0.00096	0.899822	0.01119	0.00461322	0.014					-	-	CTC-273B12.5; CTC-273B12.7; CYTH2; CTC-273B12.8; LMTK3; CTC-273B12.10
208	49058564	19	rs58046741	T	G	0.666671	-0.00844532	0.0020034	2.3e-05	0.661834	-0.0093465	0.00272505	0.00065	0.671547	-0.00795428	0.00296016	0.0049					blood protein measurement	Emilsson V, Science, 2018	SULT2B1
209	49071874	19	rs2665606	C	G	0.966224	-0.0214002	0.00532875	6.9e-05	0.964926	-0.0230361	0.00721839	0.0014	0.967534	-0.0186448	0.00790748	0.019					serum carcinoembryonic antigen measurement; resting metabolic rate measurement; blood protein measurement	Liang Y, PLoS One, 2014; Piaggi P, Diabetes, 2017; Emilsson V, Science, 2018	SULT2B1
210	49073026	19	rs8108788	T	G	0.966535	-0.0217919	0.00532148	5e-05	0.965266	-0.0234842	0.00720394	0.0011	0.967814	-0.0190057	0.00790208	0.017					serum carcinoembryonic antigen measurement; resting metabolic rate measurement; blood protein measurement	Liang Y, PLoS One, 2014; Piaggi P, Diabetes, 2017; Emilsson V, Science, 2018	SULT2B1
211	49076438	19	rs2665578	T	C	0.966836	-0.0220753	0.00531945	4e-05	0.965273	-0.0232206	0.00718353	0.0012	0.968411	-0.0197294	0.00792062	0.013					serum carcinoembryonic antigen measurement; resting metabolic rate measurement; blood protein measurement	Liang Y, PLoS One, 2014; Piaggi P, Diabetes, 2017; Emilsson V, Science, 2018	SULT2B1
212	52650255	19	rs8102341	T	A	0.315049	0.00490019	0.00208179	0.019	0.314572	0.0112639	0.00287243	9.7e-05	0.31553	-0.000589669	0.00303043	0.82					-	-	ZNF616; CTC-471J1.8; snoU13; CTC-471J1.9; RPL37P23; ZNF836; CTD-2525I3.2
213	52651698	19	rs4802896	T	A	0.315509	0.00500161	0.00208077	0.017	0.31502	0.0112971	0.00287208	9.2e-05	0.316001	-0.000432068	0.00302785	0.86					-	-	ZNF616; CTC-471J1.8; snoU13; CTC-471J1.9; RPL37P23; ZNF836; CTD-2525I3.2
214	52656226	19	rs10409618	C	T	0.760638	0.00443083	0.00223939	0.045	0.754927	0.0131544	0.00305705	1.4e-05	0.766395	-0.00440305	0.00329687	0.2	0.754927	0.0131544	0.00305705	7.66044e-05	-	-	ZNF616; CTC-471J1.8; snoU13; CTC-471J1.9; RPL37P23; ZNF836; CTD-2525I3.2
215	53195210	19	rs192301995	G	C	0.979513	-0.0156822	0.00713555	0.027	0.980028	0.00619119	0.00994739	0.53	0.978994	-0.0387105	0.0102833	8.1e-05	0.980028	0.00619119	0.00994739	0.00148059	-	-	ZNF83; ZNF611
216	54639343	19	19:54639343	T	A	0.867865	-0.00696622	0.00278815	0.012	0.864377	0.00158077	0.00375561	0.73	0.871381	-0.0168656	0.00416342	6.4e-05	0.864377	0.00158077	0.00375561	0.000863261	asparaginase hypersensitivity, acute lymphoblastic leukemia; A1C measurement, type II diabetes mellitus, response to metformin	Hojfeldt SG, Br J Haematol, 2018; Rotroff DM, Diabetes, 2018	TFPT; PRPF31; AC012314.8; CNOT3; LENG1; TMC4
217	54785863	19	19:54785863	C	A	0.940034	-0.0139619	0.00399456	0.0004	0.935396	-0.0231323	0.00526586	8.4e-06	0.944709	-0.00511612	0.00611926	0.47	0.935396	-0.0231323	0.00526586	0.0238324	high density lipoprotein cholesterol measurement; Takayasu arteritis; red blood cell distribution width; erythrocyte count; HDL cholesterol change measurement, physical activity; response to bronchodilator, FEV/FEC ratio; prostate carcinoma; leukocyte immunoglobulin-like receptor subfamily B member 2 measurement; creatine kinase measurement; L lactate dehydrogenase measurement; blood protein meas…	Hoffmann TJ, Nat Genet, 2018; Terao C, Proc Natl Acad Sci U S A, 2018; Renauer PA, Arthritis Rheumatol, 2015; Klarin D, Nat Genet, 2018; Kichaev G, Am J Hum Genet, 2018; Kilpelainen TO, Nat Commun, 2019; Lutz SM, BMC Genet, 2015; Xu J, Nat Genet, 2012; Suhre K, Nat Commun, 2017; Kanai M, Nat Genet, 2018; Sun BB, Nature, 2018; Spracklen CN, Hum Mol Genet, 2017; Emilsson V, Science, 2018	LILRB5; RNU6-1307P; AC098789.1; AC010492.5; LILRB2; MIR4752; AC010518.3; LILRA3; AC008984.5
218	55552144	19	19:55552144	G	A	0.369141	-0.00766344	0.00192212	6.6e-05	0.369291	-0.00428535	0.0026184	0.11	0.36899	-0.0111701	0.00283497	0.0002	0.369291	-0.00428535	0.0026184	0.0708056	mean corpuscular hemoglobin; platelet glycoprotein VI measurement; mean platelet volume; platelet component distribution width; colorectal cancer, breast carcinoma; blood protein measurement	Kichaev G, Am J Hum Genet, 2018; Suhre K, Nat Commun, 2017; Astle WJ, Cell, 2016; Pande M, PLoS One, 2018; Emilsson V, Science, 2018	CTC-550B14.7; GP6; CTC-550B14.6; RDH13
219	55554711	19	19:55554711	C	T	0.332062	-0.00831137	0.00196936	2.7e-05	0.332652	-0.00654163	0.0026849	0.017	0.331468	-0.0102315	0.00290219	0.00094	0.332652	-0.00654163	0.0026849	0.344574	mean corpuscular hemoglobin; platelet glycoprotein VI measurement; mean platelet volume; platelet component distribution width; colorectal cancer, breast carcinoma; blood protein measurement	Kichaev G, Am J Hum Genet, 2018; Suhre K, Nat Commun, 2017; Astle WJ, Cell, 2016; Pande M, PLoS One, 2018; Emilsson V, Science, 2018	CTC-550B14.7; GP6; CTC-550B14.6; RDH13
220	55561570	19	19:55561570	T	C	0.316456	-0.00829611	0.00201383	4e-05	0.319386	-0.0051473	0.00274741	0.068	0.313502	-0.0114172	0.00296584	0.00022	0.319386	-0.0051473	0.00274741	0.11627	mean corpuscular hemoglobin; platelet glycoprotein VI measurement; mean platelet volume; platelet component distribution width; colorectal cancer, breast carcinoma; blood protein measurement	Kichaev G, Am J Hum Genet, 2018; Suhre K, Nat Commun, 2017; Astle WJ, Cell, 2016; Pande M, PLoS One, 2018; Emilsson V, Science, 2018	CTC-550B14.7; GP6; CTC-550B14.6; RDH13; EPS8L1
221	55566454	19	19:55566454	T	G	0.199604	-0.00859365	0.00235314	0.00028	0.204857	-0.00290865	0.00318854	0.37	0.194308	-0.0146888	0.00349166	4.8e-05	0.204857	-0.00290865	0.00318854	0.0116354	mean corpuscular hemoglobin; platelet glycoprotein VI measurement; colorectal cancer, breast carcinoma	Kichaev G, Am J Hum Genet, 2018; Suhre K, Nat Commun, 2017; Pande M, PLoS One, 2018	CTC-550B14.7; GP6; CTC-550B14.6; RDH13; EPS8L1
222	55572240	19	19:55572240	A	T	0.227264	-0.00711032	0.0022311	0.0015	0.231069	-0.00139683	0.00305195	0.64	0.223429	-0.0133681	0.003277	8.8e-05	0.231069	-0.00139683	0.00305195	0.00678182	platelet glycoprotein VI measurement	Suhre K, Nat Commun, 2017	CTC-550B14.7; GP6; CTC-550B14.6; RDH13; EPS8L1
223	55574907	19	19:55574907	G	A	0.282547	-0.00845479	0.00215625	7.4e-05	0.290071	-0.00525595	0.00294902	0.07	0.274962	-0.0124423	0.00316909	0.00012	0.290071	-0.00525595	0.00294902	0.0927208	platelet glycoprotein VI measurement	Suhre K, Nat Commun, 2017	CTC-550B14.7; CTC-550B14.6; RDH13; EPS8L1
224	55856862	19	rs74977864	G	A	0.98661	-0.0216992	0.00869588	0.012	0.985964	-0.0497766	0.0117211	2e-05	0.987262	0.00922788	0.0129736	0.46					osteoarthritis, hip; vital capacity; smoking status measurement; response to antidepressant; age at menopause; age at menarche; unipolar depression	Styrkarsdottir U, Nat Genet, 2018; Kichaev G, Am J Hum Genet, 2018; Tachmazidou I, Nat Genet, 2019; Liu M, Nat Genet, 2019; Uher R, Am J Psychiatry, 2010; Perry JR, Hum Mol Genet, 2013; Day FR, Nat Genet, 2015; Horikoshi M, Nat Commun, 2018; Stolk L, Nat Genet, 2012; Wong ML, Mol Psychiatry, 2016	TMEM150B; SUV420H2; AC020922.1; COX6B2; CTD-2105E13.6; FAM71E2; IL11
225	55884200	19	rs530570733	G	T	0.988026	-0.0363151	0.00873797	3.3e-05	0.987604	-0.0449552	0.011869	0.00016	0.988451	-0.0287331	0.0129274	0.024					osteoarthritis, hip; vital capacity; smoking status measurement; response to antidepressant; blood protein measurement	Styrkarsdottir U, Nat Genet, 2018; Kichaev G, Am J Hum Genet, 2018; Tachmazidou I, Nat Genet, 2019; Liu M, Nat Genet, 2019; Uher R, Am J Psychiatry, 2010; Sun BB, Nature, 2018; Emilsson V, Science, 2018	SUV420H2; COX6B2; CTD-2105E13.6; FAM71E2; IL11; TMEM190; CTD-2105E13.15; TMEM238; RPL28
226	55884977	19	rs568477478	T	C	0.988026	-0.0363151	0.00873797	3.3e-05	0.987604	-0.0449552	0.011869	0.00016	0.988451	-0.0287331	0.0129274	0.024					osteoarthritis, hip; vital capacity; smoking status measurement; response to antidepressant; blood protein measurement	Styrkarsdottir U, Nat Genet, 2018; Kichaev G, Am J Hum Genet, 2018; Tachmazidou I, Nat Genet, 2019; Liu M, Nat Genet, 2019; Uher R, Am J Psychiatry, 2010; Sun BB, Nature, 2018; Emilsson V, Science, 2018	COX6B2; CTD-2105E13.6; FAM71E2; IL11; TMEM190; CTD-2105E13.15; TMEM238; RPL28
227	56066139	19	rs7249922	C	A	0.331454	-0.00787068	0.00195736	7.8e-05	0.330558	-0.00481495	0.00269796	0.073	0.332358	-0.0103043	0.00285228	0.00032					dysmenorrheic pain measurement	Jones AV, Pain, 2016	SBK2; SBK3; CTD-2537I9.5; ZNF579
1	583256	5	rs557826100	G	T	0.989273	-0.0270676	0.00922454	0.0032					0.98716	-0.0481309	0.0122603	6.5e-05					Cystic fibrosis, lung disease severity measurement; ulcerative colitis	Corvol H, Nat Commun, 2015; McGovern DP, Nat Genet, 2010; Liu JZ, Nat Genet, 2015; Jostins L, Nature, 2012; de Lange KM, Nat Genet, 2017; Anderson CA, Nat Genet, 2011	RP11-310P5.1
2	777685	5	rs112927770	A	G	0.941934	-0.0144238	0.00452315	0.0014	0.946411	-0.0014585	0.00653685	0.84	0.937421	-0.0278896	0.00631159	6.3e-06	0.946411	-0.0014585	0.00653685	0.00321984	-	-	ZDHHC11; ZDHHC11B; CTD-2589H19.4
3	3591434	5	rs73028351	C	A	0.923736	-0.014269	0.00363553	7.7e-05	0.922079	-0.0146416	0.00497132	0.0029	0.925407	-0.0137279	0.0053368	0.011					vital capacity; red blood cell distribution width; waist-hip ratio; trimethyllysine measurement; glomerular filtration rate; adolescent idiopathic scoliosis	Kichaev G, Am J Hum Genet, 2018; Li XS, JCI Insight, 2018; Kanai M, Nat Genet, 2018; Liu J, Hum Genet, 2018	IRX1; CTD-2012M11.3
4	4291392	5	rs78012836	T	C	0.902464	0.0135559	0.00315899	2.1e-05	0.902214	0.0144314	0.00433504	0.001	0.902716	0.0115654	0.00462001	0.011					t-tau measurement; endometriosis; hip geometry	Chung J, Alzheimers Dement, 2017; Sobalska-Kwapis M, Eur J Obstet Gynecol Reprod Biol, 2017; Baird DA, J Bone Miner Res, 2018	-
5	8063744	5	rs116834877	G	A	0.976856	0.00330738	0.00691269	0.65	0.975845	-0.0226103	0.00939158	0.016	0.977875	0.0349812	0.0102171	0.00083	0.975845	-0.0226103	0.00939158	2.63691e-05	stem Cell Factor measurement	Ahola-Olli AV, Am J Hum Genet, 2016	-
6	8404858	5	rs73049361	G	A	0.867092	0.0106716	0.00277359	0.00012	0.870092	0.00272307	0.00385705	0.49	0.864068	0.0177794	0.00400377	7.9e-06					-	-	RP11-480D4.1; RP11-480D4.2; RP11-480D4.5
7	8407618	5	rs7702450	A	G	0.914923	0.0131635	0.00346463	0.00014	0.917941	0.00254034	0.00488901	0.61	0.91188	0.0226451	0.00493341	4.1e-06					-	-	RP11-480D4.1; RP11-480D4.2; RP11-480D4.5
8	8410008	5	rs13357542	C	G	0.699009	0.00611036	0.00203864	0.0027	0.709444	0.000457292	0.00283485	0.91	0.688489	0.0116645	0.00294558	6.9e-05	0.709444	0.000457292	0.00283485	0.00549652	-	-	RP11-480D4.1; RP11-480D4.2; RP11-480D4.5
9	8410155	5	rs13361808	G	A	0.698993	0.00615686	0.00203884	0.0026	0.709431	0.000558236	0.00283604	0.88	0.68847	0.0116603	0.00294496	7e-05	0.709431	0.000558236	0.00283604	0.00595781	-	-	RP11-480D4.1; RP11-480D4.2; RP11-480D4.5
10	8411027	5	rs73049375	C	T	0.699142	0.00614495	0.00203871	0.0026	0.709608	0.000516686	0.00283566	0.89	0.688591	0.0116614	0.00294499	7e-05					-	-	RP11-480D4.1; RP11-480D4.2; RP11-480D4.5
11	8411165	5	rs73049377	T	A	0.699142	0.00614495	0.00203871	0.0026	0.709608	0.000516686	0.00283566	0.89	0.688591	0.0116614	0.00294499	7e-05					-	-	RP11-480D4.1; RP11-480D4.2; RP11-480D4.5
12	8411410	5	rs16880521	G	C	0.699142	0.00614495	0.00203871	0.0026	0.709608	0.000516686	0.00283566	0.89	0.688591	0.0116614	0.00294499	7e-05	0.709608	0.000516686	0.00283566	0.0057656	-	-	RP11-480D4.1; RP11-480D4.2; RP11-480D4.5
13	8427829	5	rs111620157	T	G	0.873214	0.0114896	0.00288618	6.5e-05	0.878129	0.00237793	0.00406586	0.54	0.868259	0.0197973	0.00411696	1.7e-06	0.878129	0.00237793	0.00406586	0.00229653	-	-	RP11-480D4.1; RP11-480D4.2; RP11-480D4.5; RP11-480D4.6; MIR4458HG
14	8435293	5	rs73051426	T	C	0.871041	0.011697	0.00287207	4.4e-05	0.876262	0.0027809	0.00404559	0.48	0.865778	0.019845	0.0040974	1.4e-06					-	-	RP11-480D4.1; RP11-480D4.2; RP11-480D4.5; RP11-480D4.6; MIR4458HG; RP11-480D4.4
15	8435489	5	rs9313238	C	T	0.666696	0.00800331	0.00198538	5.2e-05	0.674565	0.006762	0.00275662	0.015	0.658764	0.00957413	0.00287147	0.001					-	-	RP11-480D4.1; RP11-480D4.2; RP11-480D4.5; RP11-480D4.6; MIR4458HG; RP11-480D4.4
16	8624555	5	rs114313492	C	T	0.958237	-0.0171892	0.00460999	0.0002	0.957791	-0.00961153	0.00629027	0.13	0.958687	-0.0260145	0.00678192	7.8e-05	0.957791	-0.00961153	0.00629027	0.0725123	-	-	MTND6P2; RP11-417J1.3
17	8631396	5	rs148875890	C	T	0.95756	-0.0169628	0.00457318	0.00021	0.957305	-0.0095363	0.00625226	0.13	0.957816	-0.0255687	0.00671406	9e-05	0.957305	-0.0095363	0.00625226	0.0767631	uric acid measurement	Karns R, Ann Hum Genet, 2012	MTND6P2; RP11-417J1.3
18	8647759	5	rs114082964	G	A	0.988327	-0.0308782	0.00886629	0.00053	0.989307	-0.0608826	0.0127632	1.9e-06	0.987338	-0.00465724	0.0124044	0.73	0.989307	-0.0608826	0.0127632	0.00137702	uric acid measurement	Karns R, Ann Hum Genet, 2012	-
19	8752905	5	rs140614975	T	A	0.964996	-0.0150823	0.00506358	0.003	0.963771	-0.00361677	0.00689625	0.62	0.96623	-0.0287068	0.00746448	6.6e-05	0.963771	-0.00361677	0.00689625	0.0124082	bone mineral content measurement	Chesi A, J Bone Miner Res, 2017	-
20	8874890	5	rs115897350	G	A	0.944293	-0.0163362	0.00415503	8.6e-05	0.944688	-0.00726792	0.00574242	0.21	0.943895	-0.0257615	0.00603357	9.8e-06	0.944688	-0.00726792	0.00574242	0.024538	-	-	RP11-143A12.3
21	8877836	5	rs10063088	A	G	0.808579	-0.00836798	0.00240255	0.00054	0.806617	-0.00198527	0.00330881	0.56	0.810557	-0.0140594	0.00350116	4.4e-05	0.806617	-0.00198527	0.00330881	0.0111367	-	-	RP11-143A12.3
22	8877978	5	rs28809502	C	T	0.808174	-0.00848916	0.00240138	0.00045	0.80605	-0.00215208	0.0033068	0.53	0.810315	-0.0141333	0.00349993	4e-05					-	-	RP11-143A12.3
23	8878008	5	rs28791877	A	T	0.808323	-0.00850625	0.00240194	0.00044	0.806327	-0.00218091	0.00330767	0.52	0.810335	-0.0141415	0.00350061	4e-05					-	-	RP11-143A12.3
24	8881016	5	rs12657472	T	A	0.807135	-0.00820292	0.00239135	0.00066	0.805066	-0.00182007	0.00329804	0.59	0.809222	-0.0139487	0.00347994	4.5e-05	0.805066	-0.00182007	0.00329804	0.0104079	-	-	RP11-143A12.3
25	8881166	5	rs12657070	A	C	0.832822	-0.00865983	0.00254733	0.00067	0.829649	-0.00245659	0.00348782	0.48	0.836021	-0.0146758	0.0037346	6.6e-05	0.829649	-0.00245659	0.00348782	0.0154477	-	-	RP11-143A12.3
26	8881206	5	rs7447912	C	A	0.80723	-0.0081157	0.0023924	0.00076	0.805236	-0.0018014	0.00329931	0.6	0.809241	-0.0137811	0.00348163	5.6e-05					-	-	RP11-143A12.3
27	8881410	5	rs187448424	T	G	0.79079	-0.00800184	0.00229659	0.00052	0.788544	-0.00262954	0.00316312	0.41	0.793055	-0.0132631	0.00334651	6.6e-05	0.788544	-0.00262954	0.00316312	0.0193525	-	-	RP11-143A12.3
28	8881687	5	rs4487463	T	C	0.795649	-0.00885087	0.00232689	0.00015	0.794304	-0.00309414	0.00321137	0.34	0.797005	-0.0146032	0.00338367	1.3e-05					-	-	RP11-143A12.3
29	8882201	5	rs9284969	T	C	0.791015	-0.007943	0.00229936	0.00058	0.788853	-0.00251501	0.00316722	0.43	0.793195	-0.0133204	0.00335025	6.2e-05					-	-	RP11-143A12.3
30	8883722	5	rs10052504	G	A	0.793831	-0.00823933	0.00231082	0.00037	0.791698	-0.0022675	0.00318508	0.48	0.795981	-0.0143356	0.00336476	1.8e-05	0.791698	-0.0022675	0.00318508	0.00834122	-	-	RP11-143A12.3
31	8885423	5	5:8885423	T	C	0.790094	-0.00782599	0.00229318	0.00069	0.787787	-0.00247438	0.00315961	0.44	0.792419	-0.013119	0.0033403	7.7e-05	0.787787	-0.00247438	0.00315961	0.019046	-	-	RP11-143A12.3
32	8885424	5	rs4588557	G	A	0.793897	-0.00817463	0.00231216	0.00042	0.791881	-0.00223331	0.0031874	0.49	0.79593	-0.0142878	0.00336619	2e-05					-	-	RP11-143A12.3
33	8885471	5	rs10056560	G	A	0.794543	-0.00830155	0.0023151	0.00034	0.792865	-0.00240306	0.00319442	0.46	0.796235	-0.0144153	0.00336726	1.7e-05	0.792865	-0.00240306	0.00319442	0.00876545	-	-	RP11-143A12.3
34	8886481	5	rs12652111	A	G	0.790284	-0.00791138	0.00229426	0.0006	0.788166	-0.00267877	0.00316257	0.4	0.792419	-0.013119	0.0033403	7.7e-05	0.788166	-0.00267877	0.00316257	0.021528	-	-	RP11-143A12.3
35	8887760	5	rs115361084	A	G	0.944714	-0.0159772	0.00417913	0.00014	0.945155	-0.00753098	0.00578312	0.2	0.94427	-0.0246522	0.0060609	2.5e-05	0.945155	-0.00753098	0.00578312	0.0384668	-	-	RP11-143A12.3
36	8888153	5	rs114230938	T	C	0.93065	-0.0160633	0.00375467	2.1e-05	0.929466	-0.00844194	0.00514337	0.099	0.931843	-0.0241793	0.0055014	6.4e-06	0.929466	-0.00844194	0.00514337	0.0343242	-	-	RP11-143A12.3
37	8888160	5	rs114888479	G	A	0.932385	-0.0164705	0.00379926	1.6e-05	0.931353	-0.00872683	0.00522047	0.093	0.933427	-0.0246461	0.00554922	5e-06	0.931353	-0.00872683	0.00522047	0.0343367	-	-	RP11-143A12.3
38	8888341	5	rs115552072	C	T	0.944062	-0.0160288	0.00416544	0.00013	0.944619	-0.00779649	0.00577374	0.18	0.9435	-0.0244963	0.00603123	2.6e-05	0.944619	-0.00779649	0.00577374	0.0427999	-	-	RP11-143A12.3
39	9630187	5	rs41470	T	C	0.974192	-0.0142012	0.00618518	0.023	0.976211	-0.035188	0.00888303	7.7e-05	0.972157	0.00473412	0.00867198	0.53					PR interval, Trypanosoma cruzi seropositivity; autism	Deng X, PLoS One, 2013; Weiss LA, Nature, 2009	CTD-2001E22.1; TAS2R1; CTD-2143L24.1
40	9635940	5	rs2521558	T	C	0.0677793	0.00844888	0.00371345	0.022	0.0668118	0.0199457	0.00511078	8.6e-05	0.0687548	-0.00449032	0.00541502	0.42	0.0668118	0.0199457	0.00511078	0.000888542	PR interval, Trypanosoma cruzi seropositivity; autism	Deng X, PLoS One, 2013; Weiss LA, Nature, 2009	CTD-2001E22.1; TAS2R1; CTD-2143L24.1
41	9637909	5	rs194091	C	T	0.0639156	0.00756907	0.00382764	0.046	0.0620868	0.0213652	0.00530071	5.2e-05	0.0657593	-0.00742706	0.00554762	0.2	0.0620868	0.0213652	0.00530071	0.000144497	PR interval, Trypanosoma cruzi seropositivity; autism	Deng X, PLoS One, 2013; Weiss LA, Nature, 2009	CTD-2001E22.1; TAS2R1; CTD-2143L24.1
42	9638045	5	rs182585	G	T	0.068343	0.00847806	0.00370887	0.021	0.0675057	0.0201539	0.00510116	7.1e-05	0.0691872	-0.00470088	0.00541186	0.4	0.0675057	0.0201539	0.00510116	0.000712747	PR interval, Trypanosoma cruzi seropositivity; autism	Deng X, PLoS One, 2013; Weiss LA, Nature, 2009	CTD-2001E22.1; TAS2R1; CTD-2143L24.1
30	20540661	12	rs141449585	T	C	0.976371	-0.00292716	0.00623296	0.62	0.976079	0.0268233	0.00862791	0.0021	0.976666	-0.0320312	0.00905367	0.00045	0.976079	0.0268233	0.00862791	1.87918e-06	QT interval; response to carboplatin; male infertility	Marroni F, Circ Cardiovasc Genet, 2009; Wheeler HE, Pharmacogenomics J, 2011; Aston KI, J Androl, 2009	RP11-284H19.1; PDE3A
44	9668932	5	rs194095	A	T	0.0708354	0.00903803	0.00364623	0.011	0.0664522	0.0204336	0.00510577	5.4e-05	0.0752544	-0.00276733	0.00523099	0.63	0.0664522	0.0204336	0.00510577	0.00130665	-	-	CTD-2001E22.1; TAS2R1; CTD-2143L24.1
45	9670251	5	rs186357	T	C	0.0708354	0.00903803	0.00364623	0.011	0.0664522	0.0204336	0.00510577	5.4e-05	0.0752544	-0.00276733	0.00523099	0.63	0.0664522	0.0204336	0.00510577	0.00130665	-	-	CTD-2001E22.1; TAS2R1; CTD-2143L24.1
46	9670828	5	rs178148	C	A	0.0667437	0.00819025	0.00374171	0.025	0.0639036	0.0201254	0.00519001	9e-05	0.069607	-0.00453732	0.00541537	0.42	0.0639036	0.0201254	0.00519001	0.000868572	-	-	CTD-2001E22.1; TAS2R1; CTD-2143L24.1
47	9671757	5	rs1604460	A	C	0.0709051	0.00921383	0.00364506	0.0097	0.066591	0.0207548	0.00510208	4.1e-05	0.0752544	-0.00276463	0.00523119	0.63	0.066591	0.0207548	0.00510208	0.00111519	-	-	CTD-2001E22.1; TAS2R1; CTD-2143L24.1
48	9671989	5	rs588012	A	C	0.0707816	0.00907753	0.00364613	0.011	0.066408	0.0204237	0.00510556	5.5e-05	0.0751908	-0.0027006	0.00523089	0.64					-	-	CTD-2001E22.1; TAS2R1; CTD-2143L24.1
49	9672993	5	rs404718	T	C	0.0708069	0.00907732	0.00364623	0.011	0.0664396	0.0204416	0.00510566	5.4e-05	0.0752099	-0.00271733	0.00523108	0.64					-	-	CTD-2001E22.1; TAS2R1; CTD-2143L24.1
50	9680155	5	rs366964	T	C	0.0742051	0.0091789	0.00357381	0.0088	0.0694676	0.0199105	0.00502307	6.5e-05	0.0789812	-0.00157758	0.00510956	0.82					-	-	CTD-2001E22.1; TAS2R1; CTD-2143L24.1
51	9688280	5	rs41494	A	T	0.0669813	0.00863567	0.00375432	0.02	0.0642947	0.0218635	0.00523612	2.5e-05	0.0696896	-0.00367619	0.00540473	0.47					-	-	TAS2R1; CTD-2143L24.1
52	10489579	5	rs17759853	G	A	0.969407	0.0213612	0.00545525	8.7e-05	0.969972	0.0203565	0.00752456	0.0061	0.968837	0.0244654	0.00793732	0.0022	0.969972	0.0203565	0.00752456	0.703591	HVA measurement, MHPG measurement; type I diabetes mellitus, coronary artery disease; velopharyngeal dysfunction; breast carcinoma	Luykx JJ, Mol Psychiatry, 2013; Charmet R, Cardiovasc Diabetol, 2018; Chernus J, Sci Rep, 2018; Sehrawat B, Hum Genet, 2011	ROPN1L; RP11-1C1.7; RPL30P7; RP11-1C1.6; RP11-1C1.4; RP11-1C1.5
53	11607177	5	rs115962739	T	C	0.910169	4.38321e-05	0.00328619	1	0.916629	-0.0139737	0.0046751	0.0035	0.903657	0.0115847	0.00464859	0.019	0.916629	-0.0139737	0.0046751	8.63002e-05	macula measurement; adolescent idiopathic scoliosis	Gao XR, Hum Mol Genet, 2018; Liu J, Hum Genet, 2018	CTNND2
54	11615049	5	rs2561628	A	G	0.909178	5.70173e-05	0.00325396	1	0.915525	-0.0140308	0.00462191	0.003	0.902779	0.0115148	0.00460926	0.019	0.915525	-0.0140308	0.00462191	7.38364e-05	adolescent idiopathic scoliosis	Liu J, Hum Genet, 2018	CTNND2
55	11620152	5	rs2561592	T	C	0.868435	0.00179138	0.00277134	0.53	0.875839	-0.0102651	0.00389631	0.0092	0.86097	0.0121192	0.00396236	0.0029	0.875839	-0.0102651	0.00389631	4.5134e-05	adolescent idiopathic scoliosis	Liu J, Hum Genet, 2018	CTNND2
56	11620986	5	rs2561593	G	A	0.911021	-0.000885964	0.00328671	0.79	0.917007	-0.0148411	0.00465434	0.0017	0.904986	0.0106515	0.00466792	0.03	0.917007	-0.0148411	0.00465434	8.97693e-05	adolescent idiopathic scoliosis	Liu J, Hum Genet, 2018	CTNND2
57	11630448	5	rs74667301	G	C	0.927578	-0.00393002	0.00362601	0.29	0.931971	-0.0207821	0.00512435	6.3e-05	0.923149	0.0101062	0.00515785	0.058					-	-	CTNND2
58	11632166	5	rs2561601	C	T	0.911072	-0.000813712	0.00328217	0.81	0.916856	-0.0152184	0.00463974	0.0013	0.90524	0.0111279	0.00466864	0.023	0.916856	-0.0152184	0.00463974	5.03744e-05	-	-	CTNND2
59	11639061	5	rs76041946	T	G	0.934463	0.00979299	0.00383619	0.011	0.929927	-0.00181845	0.00510832	0.73	0.939036	0.0219895	0.00580124	8.2e-05					-	-	CTNND2
60	11734893	5	rs7736420	T	G	0.0141753	0.0334267	0.00815623	3.7e-05	0.013708	0.0336542	0.011348	0.0026	0.0146464	0.0323049	0.0117667	0.0081					-	-	CTNND2
61	12628928	5	5:12628928	C	A	0.927163	-0.00145164	0.003585	0.69	0.928684	-0.0146048	0.0050036	0.0038	0.92563	0.013243	0.00515654	0.013	0.928684	-0.0146048	0.0050036	8.66396e-05	-	-	CT49
62	20424812	5	rs112682271	C	T	0.985999	-0.0325625	0.0080037	5.1e-05	0.987831	-0.0376575	0.0118121	0.0015	0.984152	-0.0291748	0.0109766	0.0078	0.987831	-0.0376575	0.0118121	0.594196	-	-	CDH18
63	20428062	5	rs112116150	G	A	0.985999	-0.0325625	0.0080037	5.1e-05	0.987831	-0.0376575	0.0118121	0.0015	0.984152	-0.0291748	0.0109766	0.0078	0.987831	-0.0376575	0.0118121	0.594196	-	-	CDH18
64	20536559	5	rs150744905	T	C	0.982537	-0.0354162	0.00731963	1.3e-06	0.98245	-0.0494761	0.0100123	7.5e-07	0.982625	-0.0212245	0.0107404	0.047	0.98245	-0.0494761	0.0100123	0.0513471	-	-	CDH18
65	20542546	5	rs146793722	C	T	0.982955	-0.0362683	0.00744691	1.1e-06	0.983037	-0.0515325	0.0102095	4.5e-07	0.982873	-0.0209944	0.0109017	0.054	0.983037	-0.0515325	0.0102095	0.0383893	-	-	CDH18
66	20544251	5	rs145849737	C	G	0.983	-0.0363909	0.00746354	1.1e-06	0.983125	-0.0519218	0.0102547	4.1e-07	0.982873	-0.0209944	0.0109017	0.054	0.983125	-0.0519218	0.0102547	0.036372	-	-	CDH18
67	20548404	5	rs145775826	A	G	0.983902	-0.0355689	0.00765897	3.3e-06	0.98416	-0.052035	0.0105593	7.9e-07	0.983643	-0.0191647	0.0111487	0.084	0.98416	-0.052035	0.0105593	0.0301647	-	-	CDH18
68	20549408	5	rs150340920	A	G	0.982876	-0.035913	0.00746197	1.5e-06	0.98298	-0.0513238	0.0102281	5.2e-07	0.982772	-0.0205009	0.010926	0.061	0.98298	-0.0513238	0.0102281	0.0370029	-	-	CDH18
69	20552942	5	rs190082809	G	A	0.982689	-0.0363831	0.00748506	1.2e-06	0.982986	-0.0528927	0.010277	2.8e-07	0.98239	-0.0203182	0.0109412	0.064	0.982986	-0.0528927	0.010277	0.0279687	-	-	CDH18
70	20560209	5	rs149117169	G	A	0.983715	-0.0339403	0.00778376	1.3e-05	0.983952	-0.0493562	0.010725	4.2e-06	0.983477	-0.0186176	0.011337	0.099	0.983952	-0.0493562	0.010725	0.0460687	-	-	CDH18
71	22251403	5	rs146069023	T	C	0.987323	-0.0157132	0.00892936	0.077	0.986241	0.0207625	0.0119148	0.092	0.988413	-0.0530984	0.0134645	0.00012	0.986241	0.0207625	0.0119148	3.17982e-05	-	-	CDH12
72	22660666	5	rs189037604	A	T	0.983215	-0.0127417	0.00739026	0.09	0.983327	-0.0415174	0.0103813	6.8e-05	0.983102	0.0145657	0.0105649	0.17	0.983327	-0.0415174	0.0103813	0.000125692	breast carcinoma	Michailidou K, Nature, 2017	CDH12
73	22722974	5	rs115979551	C	T	0.969122	-0.0222543	0.0054883	5.1e-05	0.967726	-0.0128936	0.00738835	0.075	0.970529	-0.0291675	0.00819299	0.00047	0.967726	-0.0128936	0.00738835	0.135215	-	-	CDH12
74	22748648	5	rs140638305	G	A	0.962627	-0.0117742	0.00496137	0.018	0.964169	-0.0280743	0.00704184	6.1e-05	0.961072	0.00331177	0.00702687	0.6	0.964169	-0.0280743	0.00704184	0.0013969	-	-	CDH12
75	24857180	5	rs149777347	G	A	0.963938	-0.0106391	0.0055034	0.054	0.965954	0.00927597	0.00784412	0.24	0.961905	-0.0293818	0.00776657	9.7e-05	0.965954	0.00927597	0.00784412	0.000389938	-	-	RP11-730N24.1; RP11-730N24.2
76	25034562	5	rs145903716	A	G	0.984365	-0.0266821	0.00763202	0.00045	0.98428	-0.0446972	0.0104695	2.4e-05	0.984451	-0.00957646	0.0111659	0.35	0.98428	-0.0446972	0.0104695	0.0201387	peripheral arterial disease, traffic air pollution measurement; DNA methylation	Ward-Caviness CK, PLoS One, 2016; Zhang Q, Genome Med, 2018	-
77	25055884	5	rs116277626	C	T	0.987	-0.0191979	0.00823534	0.018	0.987055	-0.0442727	0.0113297	9.9e-05	0.986944	0.0036193	0.0120134	0.8	0.987055	-0.0442727	0.0113297	0.00331169	DNA methylation	Zhang Q, Genome Med, 2018	-
78	25162036	5	rs74349419	G	T	0.986164	-0.01973	0.00808283	0.014	0.986437	-0.0450136	0.0112064	5.9e-05	0.985888	0.00350713	0.0117005	0.8					-	-	RP11-549K20.1
79	25421061	5	rs6895258	A	G	0.418562	0.00762305	0.00189491	5.4e-05	0.417638	0.00611923	0.00262037	0.019	0.419492	0.00964269	0.00275004	0.00044					parental longevity; serum IgG glycosylation measurement	Pilling LC, Aging (Albany NY), 2016; Lauc G, PLoS Genet, 2013	CTD-2306M5.1
80	25592992	5	rs74493778	G	A	0.955282	-0.00863968	0.00450077	0.058	0.958113	-0.0243641	0.00634187	9.5e-05	0.952429	0.0043163	0.00641812	0.5					obsessive-compulsive disorder	Mattheisen M, Mol Psychiatry, 2014	-
81	25695377	5	rs10056274	T	C	0.908855	-0.0112404	0.00325634	0.00053	0.900833	-0.0174232	0.00432263	4.9e-05	0.916942	-0.00559467	0.0049471	0.32	0.900833	-0.0174232	0.00432263	0.0682581	glycoprotein measurement	Athanasiadis G, J Thromb Haemost, 2013	RNU6-374P
82	26068077	5	rs143379042	A	G	0.981803	-0.0166781	0.00695423	0.015	0.98457	0.0155547	0.0103719	0.13	0.979013	-0.0386826	0.00946409	1.3e-05	0.98457	0.0155547	0.0103719	9.15502e-05	-	-	-
83	26071966	5	rs145272624	C	T	0.981106	-0.0167562	0.0067701	0.012	0.984059	0.0136747	0.0101014	0.17	0.978129	-0.0376393	0.00921123	1.3e-05	0.984059	0.0136747	0.0101014	0.00014391	-	-	-
84	26090931	5	rs375814288	G	A	0.979839	-0.0167639	0.00659176	0.01	0.981901	0.0127069	0.00956914	0.18	0.97776	-0.0386045	0.00915963	7.4e-06					-	-	-
85	26096408	5	rs147834363	T	C	0.979671	-0.0164236	0.00659276	0.012	0.981927	0.0129556	0.00961795	0.17	0.977398	-0.0379252	0.0091249	9.4e-06	0.981927	0.0129556	0.00961795	0.000101589	-	-	-
86	26097106	5	rs142027653	G	A	0.979614	-0.0164164	0.00658466	0.012	0.981964	0.0132036	0.00962724	0.16	0.977245	-0.0379215	0.00909793	8.9e-06	0.981964	0.0132036	0.00962724	9.27195e-05	-	-	-
87	26103891	5	rs143085075	C	T	0.979617	-0.0162805	0.00660372	0.013	0.982021	0.0133677	0.00967693	0.16	0.977194	-0.0376972	0.00910804	1e-05	0.982021	0.0133677	0.00967693	9.95766e-05	-	-	-
88	26106025	5	rs542010649	G	A									0.988457	-0.0535168	0.0133846	2.3e-05					-	-	-
89	26113246	5	rs540866370	T	C	0.983373	-0.0198188	0.00718584	0.0056	0.987415	0.0131582	0.0113118	0.24	0.979299	-0.0382202	0.00943347	1.4e-05					-	-	-
90	26114117	5	rs565823756	C	T									0.987236	-0.0483435	0.0121876	2.5e-05					visceral adipose tissue measurement	Fox CS, PLoS Genet, 2012	-
91	26118788	5	rs571318939	T	C	0.984124	-0.0179795	0.00753402	0.016	0.9878	0.0167016	0.011912	0.16	0.980418	-0.0371129	0.00986228	5.2e-05					visceral adipose tissue measurement	Fox CS, PLoS Genet, 2012	-
92	26122006	5	rs143564558	A	G	0.979443	-0.0145576	0.00667456	0.028	0.982614	0.0159654	0.00996952	0.098	0.976247	-0.0357904	0.00907488	2.2e-05	0.982614	0.0159654	0.00996952	0.000101111	visceral adipose tissue measurement	Fox CS, PLoS Genet, 2012	-
93	26463794	5	rs75039099	C	G	0.752515	-0.0060608	0.00214723	0.0054	0.75017	-0.0117754	0.00292121	4.4e-05	0.754878	-0.000233737	0.00316888	0.99					-	-	-
94	26468184	5	rs56222672	A	T	0.732455	-0.0055251	0.0020917	0.0094	0.730135	-0.010973	0.00284811	9.7e-05	0.734794	-0.000191996	0.00308411	0.97					-	-	-
95	26535221	5	rs11952447	T	G	0.873939	-0.00620329	0.00280753	0.028	0.874054	-0.0149051	0.0038342	9.9e-05	0.873823	0.00238318	0.00412647	0.55	0.874054	-0.0149051	0.0038342	0.00188169	-	-	-
96	26560405	5	rs11948877	A	G	0.8731	-0.00641919	0.00280136	0.023	0.873208	-0.0150432	0.00382602	8.3e-05	0.87299	0.00200026	0.0041171	0.61	0.873208	-0.0150432	0.00382602	0.00213301	pneumococcal bacteremia	Rautanen A, Am J Hum Genet, 2016	-
97	26726974	5	rs145873967	G	A	0.986936	0.0294303	0.00852393	0.00065	0.987156	0.0488916	0.0118062	4.1e-05	0.986715	0.00952066	0.0123511	0.38	0.987156	0.0488916	0.0118062	0.0196131	drug-induced agranulocytosis, response to clozapine; anorexia nervosa	Goldstein JI, Nat Commun, 2014; Wang K, Mol Psychiatry, 2010	CTD-2533K21.4; CTD-2194F12.1
98	26728070	5	rs141157835	G	A	0.986806	0.0292859	0.00850547	0.00067	0.986942	0.0487381	0.0117519	4e-05	0.98667	0.0096269	0.012354	0.38	0.986942	0.0487381	0.0117519	0.0201751	drug-induced agranulocytosis, response to clozapine; anorexia nervosa	Goldstein JI, Nat Commun, 2014; Wang K, Mol Psychiatry, 2010	CTD-2533K21.4; CTD-2194F12.1
99	28305778	5	rs180957028	A	G	0.959219	-0.0040011	0.00492884	0.42	0.961033	-0.0242137	0.00696127	0.00054	0.95739	0.0147581	0.00701228	0.033	0.961033	-0.0242137	0.00696127	6.48155e-05	waist-hip ratio	Southam L, Nat Commun, 2017	CTD-2061E9.1
100	29300979	5	rs145285903	C	G	0.984742	-0.0217294	0.00787356	0.0051	0.983491	-0.0422641	0.0103889	4.9e-05	0.986002	0.000156472	0.0120301	0.93	0.983491	-0.0422641	0.0103889	0.00688172	-	-	-
101	29301019	5	rs147624577	G	C	0.984878	-0.0220894	0.007906	0.0046	0.983605	-0.0427143	0.0104216	4.3e-05	0.986161	2.44118e-05	0.012094	0.94	0.983605	-0.0427143	0.0104216	0.00671055	-	-	-
102	29352019	5	rs140104268	G	A	0.97906	-0.0173894	0.00664649	0.0091	0.97775	-0.0394368	0.00890009	9.5e-06	0.98038	0.00378143	0.00998148	0.59	0.97775	-0.0394368	0.00890009	0.00106517	dementia, Alzheimer's disease neuropathologic change	Beecham GW, PLoS Genet, 2014	-
103	29428814	5	rs186600511	T	C	0.981679	-0.0143405	0.00697032	0.04	0.9804	-0.0398191	0.00933622	2e-05	0.982969	0.0108869	0.0104647	0.23	0.9804	-0.0398191	0.00933622	0.000250722	-	-	-
104	29434149	5	rs148438089	T	G	0.979934	-0.0167383	0.00676551	0.013	0.978564	-0.0420711	0.00904978	3.3e-06	0.981315	0.00902069	0.0101728	0.3	0.978564	-0.0420711	0.00904978	0.000144666	-	-	-
105	29450041	5	rs139233099	T	A	0.981866	-0.0164306	0.00702563	0.019	0.980671	-0.0405907	0.00941697	1.6e-05	0.98307	0.00705945	0.0105391	0.41	0.980671	-0.0405907	0.00941697	0.000639558	-	-	-
106	29452031	5	rs149905080	G	A	0.980295	-0.0149883	0.00679855	0.028	0.978848	-0.0396268	0.00908647	1.3e-05	0.981754	0.0100953	0.0102323	0.25	0.978848	-0.0396268	0.00908647	0.000233635	-	-	-
107	29462374	5	rs10940801	A	C	0.980431	-0.0138596	0.00681746	0.042	0.979031	-0.0373284	0.0091168	4.3e-05	0.981843	0.00971898	0.0102542	0.27	0.979031	-0.0373284	0.0091168	0.000515891	-	-	-
108	29467119	5	rs137925202	C	T	0.98205	-0.0156345	0.00705677	0.027	0.980892	-0.0381061	0.0094655	5.7e-05	0.983217	0.00593896	0.0105772	0.47	0.980892	-0.0381061	0.0094655	0.00167544	glomerular filtration rate, chronic kidney disease	Wuttke M, Nephrol Dial Transplant, 2015	-
109	32067051	5	rs116422476	T	C	0.986445	-0.0177396	0.00806202	0.029	0.986879	0.0171078	0.0111634	0.12	0.986009	-0.0511224	0.0116851	8.9e-06	0.986879	0.0171078	0.0111634	1.90364e-05	myocardial infarction	Wakil SM, Atherosclerosis, 2016	PDZD2
110	32839552	5	rs148241621	T	A	0.98838	-0.00707961	0.00932813	0.45	0.989516	-0.0505791	0.0135796	0.00018	0.987236	0.0239148	0.0129302	0.059	0.989516	-0.0505791	0.0135796	5.73369e-05	systolic blood pressure; cardiovascular disease; pulse pressure measurement; body height; diastolic blood pressure; heel bone mineral density; mean arterial pressure; smoking status measurement, diastolic blood pressure; smoking status measurement, systolic blood pressure; systolic blood pressure, alcohol drinking; diastolic blood pressure, alcohol drinking; diastolic blood pressure, alcohol cons…	Kichaev G, Am J Hum Genet, 2018; Giri A, Nat Genet, 2018; Lango Allen H, Nature, 2010; Hoffmann TJ, Nat Genet, 2016; Ehret GB, Nat Genet, 2016; Kato N, Nat Genet, 2015; Berndt SI, Nat Genet, 2013; Wain LV, Hypertension, 2017; Liu C, Nat Genet, 2016; Surendran P, Nat Genet, 2016; Sung YJ, Am J Hum Genet, 2018; Kanai M, Nat Genet, 2018; Feitosa MF, PLoS One, 2018; Wain LV, Nat Genet, 2011; Ehret GB…	-
111	33527632	5	rs116789609	C	T	0.982819	-0.0121601	0.00719384	0.09	0.980936	0.0133927	0.00943449	0.16	0.984718	-0.0430134	0.011076	7.5e-05	0.980936	0.0133927	0.00943449	8.64671e-05	-	-	CTD-2233C11.3; CTD-2233C11.2; ADAMTS12
112	38643598	5	rs11740926	C	T	0.485353	-0.000779799	0.00188371	0.66	0.485819	0.00678958	0.00259114	0.0087	0.484883	-0.00838134	0.00274827	0.0022	0.485819	0.00678958	0.00259114	4.74795e-05	schizophrenia, heart rate variability measurement, response to antipsychotic drug	Kure Fischer E, Int Clin Psychopharmacol, 2017	LIFR-AS1
113	41303854	5	rs114697269	G	A	0.976647	0.0251268	0.00618804	5.1e-05	0.976741	0.0231641	0.00859474	0.0067	0.976552	0.0254794	0.00894191	0.0043	0.976741	0.0231641	0.00859474	0.850046	-	-	PLCXD3
114	41305497	5	rs80131732	A	G	0.97664	0.0251575	0.00618807	5e-05	0.976728	0.0232117	0.00859485	0.0066	0.976552	0.0254794	0.00894191	0.0043					-	-	PLCXD3
115	41305877	5	rs145841568	C	A	0.97664	0.0251575	0.00618807	5e-05	0.976728	0.0232117	0.00859485	0.0066	0.976552	0.0254794	0.00894191	0.0043	0.976728	0.0232117	0.00859485	0.853094	-	-	PLCXD3
116	41307524	5	rs146034302	A	G	0.976628	0.0251694	0.00618815	5e-05	0.976703	0.023248	0.00859506	0.0065	0.976552	0.0254794	0.00894191	0.0043	0.976703	0.023248	0.00859506	0.855421	-	-	PLCXD3
117	41313219	5	rs114834752	G	C	0.976821	0.0250996	0.00619925	5.3e-05	0.977	0.0228041	0.0086185	0.0078	0.976641	0.0257149	0.00894986	0.004	0.977	0.0228041	0.0086185	0.812454	-	-	PLCXD3
118	41318012	5	5:41318012	T	C	0.976492	0.0245394	0.00614042	6.7e-05	0.976596	0.0224717	0.00854176	0.0082	0.976386	0.0249297	0.00885985	0.0047	0.976596	0.0224717	0.00854176	0.839701	-	-	PLCXD3
119	41320082	5	rs146700930	A	G	0.976555	0.0241367	0.00611097	8.1e-05	0.976691	0.0224928	0.00850242	0.0079	0.976418	0.0241203	0.00881574	0.006	0.976691	0.0224928	0.00850242	0.892946	-	-	PLCXD3
120	41324290	5	rs74420797	G	A	0.976188	0.0238274	0.00610299	9.5e-05	0.976306	0.0226895	0.00847443	0.0072	0.976068	0.0235729	0.00882123	0.0072					-	-	PLCXD3
121	41328532	5	rs78573390	G	A	0.976409	0.024381	0.00611612	7e-05	0.97652	0.0227838	0.00850415	0.0072	0.976297	0.024295	0.00882861	0.0057					-	-	PLCXD3
122	41334853	5	rs143643006	C	G	0.976431	0.0244968	0.00612584	6.6e-05	0.976533	0.0230425	0.00851144	0.0066	0.976329	0.0242901	0.00884892	0.0058	0.976533	0.0230425	0.00851144	0.918034	-	-	PLCXD3
123	41340427	5	rs142779767	G	T	0.976241	0.0241499	0.00610333	7.8e-05	0.976514	0.0220762	0.00850502	0.0092	0.975967	0.0244199	0.00879156	0.0053	0.976514	0.0220762	0.00850502	0.846139	-	-	PLCXD3
124	51379161	5	rs4374711	G	T	0.987956	-0.0226939	0.00901101	0.014	0.987648	-0.0509552	0.0122135	3.4e-05	0.988266	0.00780587	0.0133507	0.59					FEV/FEC ratio; breast carcinoma	Kichaev G, Am J Hum Genet, 2018; Michailidou K, Nature, 2017	CTD-2203A3.1
125	51413703	5	rs73088809	G	T	0.982078	-0.0161019	0.00726766	0.028	0.981681	-0.0383061	0.00987307	9.9e-05	0.982479	0.00429565	0.0107416	0.69					DNA methylation	Zhang Q, Genome Med, 2018	-
126	51431023	5	rs111299856	T	C	0.987386	-0.0175562	0.00852529	0.046	0.987478	-0.0487838	0.0117801	3.8e-05	0.987293	0.0130568	0.0123819	0.32	0.987478	-0.0487838	0.0117801	0.000247721	-	-	-
127	51431051	5	rs112290812	G	A	0.987386	-0.0175562	0.00852529	0.046	0.987478	-0.0487838	0.0117801	3.8e-05	0.987293	0.0130568	0.0123819	0.32	0.987478	-0.0487838	0.0117801	0.000247721	-	-	-
128	51431381	5	5:51431381	C	T	0.98674	-0.0190287	0.00844769	0.028	0.986841	-0.0506673	0.0116766	1.6e-05	0.986638	0.0121458	0.0122653	0.35	0.986841	-0.0506673	0.0116766	0.000172318	-	-	-
129	51433545	5	rs111840572	T	C	0.987516	-0.0173543	0.00854794	0.049	0.987566	-0.0480637	0.0118152	5.3e-05	0.987465	0.0128089	0.0124109	0.33	0.987566	-0.0480637	0.0118152	0.00032101	-	-	-
130	51434643	5	rs73094439	A	G	0.987516	-0.0173543	0.00854794	0.049	0.987566	-0.0480637	0.0118152	5.3e-05	0.987465	0.0128089	0.0124109	0.33					-	-	-
131	51445846	5	rs73094452	A	T	0.987646	-0.0179402	0.00859591	0.042	0.987642	-0.0498568	0.0118202	2.7e-05	0.987649	0.0142204	0.0125453	0.28					-	-	-
132	51455605	5	rs146127610	G	A	0.987715	-0.016285	0.00865725	0.068	0.98785	-0.0490979	0.0119165	4.1e-05	0.987579	0.0163593	0.0126221	0.21	0.98785	-0.0490979	0.0119165	0.000134007	-	-	-
133	51458341	5	rs7447978	A	G	0.980194	-0.01925	0.00681824	0.0052	0.982608	-0.04729	0.0100436	2.9e-06	0.97776	0.00301258	0.00936561	0.85					-	-	-
134	51480252	5	rs73094464	A	G	0.988884	-0.0222971	0.00905399	0.017	0.988878	-0.0506477	0.0124273	5.4e-05	0.98889	0.00770288	0.0132385	0.6					thyroid stimulating hormone measurement	Malinowski JR, PLoS One, 2014	-
135	52356692	5	5:52356692	T	C	0.989448	-0.0091722	0.0094044	0.33	0.989238	0.0261476	0.0128756	0.042	0.989659	-0.0491584	0.0137867	0.00044	0.989238	0.0261476	0.0128756	5.27933e-05	-	-	ITGA2
136	52394626	5	rs2233220	C	T	0.988371	-0.00515184	0.0088262	0.56	0.988613	0.029863	0.012362	0.015	0.988126	-0.0407958	0.0126525	0.0015	0.988613	0.029863	0.012362	5.2213e-05	systemic juvenile idiopathic arthritis; intelligence	Ombrello MJ, Ann Rheum Dis, 2016; Davies G, Nat Commun, 2018	ITGA2; CTD-2366F13.2; MOCS2; CTD-2366F13.1
137	54830620	5	rs550565287	C	T	0.988881	-0.0244957	0.00947994	0.0088	0.989471	-0.0522439	0.0133364	8.8e-05	0.988285	-0.000815656	0.0135345	0.99					heel bone mineral density; nicotine dependence symptom count	Morris JA, Nat Genet, 2018; Kichaev G, Am J Hum Genet, 2018; Kemp JP, Nat Genet, 2017; Hallfors J, Addict Biol, 2018; Kim SK, PLoS One, 2018	PPAP2A; RNF138P1; AK4P2
138	55756788	5	rs55926559	A	G	0.775212	-0.00898008	0.00222567	5.4e-05	0.781914	-0.00744111	0.00308567	0.016	0.768456	-0.0112744	0.00322354	0.00047					macula measurement	Gao XR, Hum Mol Genet, 2018	AC008391.1; CTC-236F12.4
139	61254964	5	rs174524	C	T	0.357626	-0.00775182	0.00192971	6.2e-05	0.357286	-0.0062933	0.0026575	0.015	0.357969	-0.00913353	0.00281208	0.0013	0.357286	-0.0062933	0.0026575	0.457216	-	-	-
140	61265883	5	rs1374005	T	G	0.646884	0.00770598	0.0019235	6.2e-05	0.64812	0.00618582	0.00265279	0.016	0.645637	0.00921436	0.00279899	0.0011	0.64812	0.00618582	0.00265279	0.426409	-	-	-
141	61269806	5	rs4235488	C	A	0.649645	0.00785278	0.00193592	5.2e-05	0.650782	0.00639186	0.0026675	0.014	0.648499	0.00927592	0.00281962	0.00094					-	-	-
142	61284585	5	rs1374008	A	G	0.649861	0.00787688	0.00193519	4.7e-05	0.651274	0.00684316	0.00266567	0.0085	0.648436	0.00894728	0.00281945	0.0014	0.651274	0.00684316	0.00266567	0.582866	-	-	-
143	61329953	5	rs4700460	G	A	0.669638	0.00776865	0.001967	8.8e-05	0.672962	0.00538662	0.00272552	0.045	0.666287	0.0101068	0.00284928	0.00039					-	-	-
144	62833953	5	rs74520685	G	A	0.979434	-0.0194627	0.00661153	0.0027	0.980993	-0.0370717	0.00939468	7.1e-05	0.977862	-0.00634233	0.00935547	0.52					unipolar depression; coronary artery calcification, type II diabetes mellitus; body mass index	Hall LS, Transl Psychiatry, 2018; Divers J, BMC Genet, 2017; Speliotes EK, Nat Genet, 2010	-
92	56645138	11	rs1783451	C	G	0.395383	-2.35018e-05	0.00188057	1	0.408989	0.00894407	0.00257973	0.0005	0.381665	-0.00870222	0.00275807	0.00083	0.408989	0.00894407	0.00257973	2.22085e-06	-	-	AP000479.1
146	68746388	5	5:68746388	C	T	0.975884	-0.0199641	0.00628404	0.0015	0.976154	-0.00248787	0.00875279	0.74	0.975611	-0.0395275	0.0090559	2.1e-05	0.976154	-0.00248787	0.00875279	0.00289671	-	-	MARVELD2; RN7SL476P; RPS27P14
147	71084422	5	rs114229187	T	C	0.922853	-0.0110373	0.00350908	0.0017	0.923669	-0.00400906	0.00484602	0.41	0.92203	-0.0192051	0.00509948	9.9e-05	0.923669	-0.00400906	0.00484602	0.028693	pulse pressure measurement; interleukin 18 measurement	Giri A, Nat Genet, 2018; Ahola-Olli AV, Am J Hum Genet, 2016	-
148	71128111	5	rs6865909	A	G	0.784884	0.00623708	0.00234455	0.0081	0.787774	-0.00114461	0.00323298	0.69	0.78197	0.0130435	0.00341255	9.3e-05					-	-	-
149	71506196	5	rs78949672	G	C	0.98851	0.0252172	0.00949285	0.0093	0.987863	0.0542281	0.0127608	2.5e-05	0.989163	-0.00684297	0.0141931	0.65					-	-	MAP1B; MRPS27
150	75851402	5	rs142872051	T	C	0.978347	0.0188081	0.00642094	0.0039	0.980167	0.036115	0.00909337	8e-05	0.976514	0.00735187	0.00911369	0.56	0.980167	0.036115	0.00909337	0.0236552	late-onset Alzheimers disease	Mez J, Alzheimers Dement, 2016	IQGAP2
151	75855172	5	rs149571770	C	T	0.97823	0.018957	0.0063833	0.0034	0.98004	0.0361137	0.0090446	7.3e-05	0.976405	0.00760368	0.0090561	0.54	0.98004	0.0361137	0.0090446	0.0240736	late-onset Alzheimers disease	Mez J, Alzheimers Dement, 2016	IQGAP2
152	75938183	5	rs17748939	G	T	0.943945	-0.00619226	0.00403818	0.13	0.941206	0.0106268	0.00542839	0.043	0.946706	-0.0238274	0.00603881	4.2e-05	0.941206	0.0106268	0.00542839	1.73115e-05	schizophrenia, response to paliperidone, schizophrenia symptom severity measurement; hearing loss; mean platelet volume; venous thromboembolism; BMI-adjusted waist-hip ratio, sex interaction measurement	Li Q, Pharmacogenet Genomics, 2016; Van Laer L, Eur J Hum Genet, 2010; Astle WJ, Cell, 2016; Heit JA, Thromb Haemost, 2017; Winkler TW, PLoS Genet, 2015	IQGAP2; F2RL2
91	56644885	11	rs1783450	C	T	0.395082	-0.000118137	0.00188112	0.97	0.40856	0.00875748	0.0025802	0.00066	0.381493	-0.00873979	0.00275911	0.0008	0.40856	0.00875748	0.0025802	2.71996e-06	-	-	AP000479.1
154	76033676	5	rs113705264	G	A	0.970069	-0.00325174	0.00550207	0.57	0.969455	0.0201357	0.00757072	0.007	0.970688	-0.0262222	0.00802503	0.00065	0.969455	0.0201357	0.00757072	2.08572e-05	waist-hip ratio; mean corpuscular hemoglobin; response to bronchodilator, FEV/FEC ratio; mean platelet volume; platelet count; platelet component distribution width; monocyte count	Kichaev G, Am J Hum Genet, 2018; Lutz SM, BMC Genet, 2015; Gieger C, Nature, 2011; Astle WJ, Cell, 2016; Keller MF, Hum Mol Genet, 2014	CTD-2384B11.2; F2R
155	79419093	5	rs4704613	A	T	0.642703	0.00417847	0.00196994	0.035	0.639068	0.0107606	0.00273231	9.1e-05	0.646369	-0.00237614	0.00285081	0.36					-	-	SERINC5; CTC-458I2.2
156	79422993	5	rs11950944	C	T	0.372055	0.00331784	0.00193145	0.086	0.372697	0.01064	0.00265858	6.7e-05	0.371407	-0.00394093	0.00281605	0.12	0.372697	0.01064	0.00265858	0.000137277	borderline personality disorder symptom	Lubke GH, Mol Psychiatry, 2013	SERINC5; CTC-458I2.2
157	79425322	5	5:79425322	G	C	0.834362	-0.00550022	0.00253214	0.034	0.835718	-0.0150029	0.00349776	1.9e-05	0.832994	0.00412722	0.00367886	0.23	0.835718	-0.0150029	0.00349776	0.000135286	borderline personality disorder symptom	Lubke GH, Mol Psychiatry, 2013	SERINC5; CTC-458I2.2
158	79426542	5	rs56055328	T	G	0.834317	-0.00548704	0.00253229	0.035	0.835648	-0.0150033	0.00349806	1.9e-05	0.832975	0.00414967	0.00367898	0.23					borderline personality disorder symptom	Lubke GH, Mol Psychiatry, 2013	SERINC5; CTC-458I2.2
159	83714401	5	rs114195586	A	G	0.986379	-0.0189865	0.00831644	0.02	0.987459	0.013039	0.0118933	0.28	0.98529	-0.0465773	0.0117011	7.3e-05	0.987459	0.013039	0.0118933	0.000295932	-	-	CTD-2269F5.1
160	83735556	5	rs114183671	G	A	0.986661	-0.0201151	0.00842622	0.015	0.987768	0.0129971	0.0121111	0.29	0.985544	-0.0480503	0.0118044	4.9e-05	0.987768	0.0129971	0.0121111	0.000256418	-	-	CTD-2269F5.1
161	86111071	5	rs77467514	T	A	0.922767	0.00707026	0.00356734	0.044	0.924432	-0.00699252	0.00499577	0.16	0.921089	0.020444	0.00511484	7.1e-05					-	-	CTC-493L21.2
162	89558163	5	rs190657242	C	T	0.979602	0.00166695	0.00680443	0.81	0.981334	-0.0284777	0.00977109	0.0034	0.977856	0.0255773	0.00954094	0.0081	0.981334	-0.0284777	0.00977109	6.10543e-05	type II diabetes mellitus	Rung J, Nat Genet, 2009	RP11-61G23.1
163	89558660	5	rs114494194	A	G	0.979519	0.00175548	0.00680233	0.8	0.981252	-0.028383	0.00976793	0.0035	0.977773	0.0256833	0.00953812	0.0079	0.981252	-0.028383	0.00976793	6.05187e-05	type II diabetes mellitus	Rung J, Nat Genet, 2009	RP11-61G23.1
164	89582346	5	rs114507176	C	T	0.981296	0.00589499	0.00710956	0.4	0.983453	-0.0258019	0.0104492	0.014	0.979121	0.0293922	0.00978229	0.0031	0.983453	-0.0258019	0.0104492	9.41424e-05	self reported educational attainment	Kichaev G, Am J Hum Genet, 2018	RP11-61G23.1
165	90582914	5	rs1511344	G	C	0.507227	-0.000464817	0.00186446	0.82	0.49942	-0.00851212	0.00255916	0.00095	0.515098	0.00688426	0.00272745	0.0061	0.49942	-0.00851212	0.00255916	3.0586e-05	colorectal cancer	Hofer P, Oncotarget, 2017	RNU4-90P; RP11-213H15.1; LUCAT1
166	97772098	5	rs113208931	C	T	0.959922	0.0193626	0.00472073	5.8e-05	0.962257	0.0153834	0.00657083	0.019	0.957568	0.0231453	0.00680931	0.0014	0.962257	0.0153834	0.00657083	0.406123	blood protein measurement	Sun BB, Nature, 2018	RP11-474J18.1
167	107469179	5	rs547840497	T	C	0.98553	-0.0410076	0.00794326	2.9e-07	0.985434	-0.022316	0.0107993	0.037	0.985627	-0.0617874	0.0117302	1.8e-07					self reported educational attainment; pulse pressure measurement; mathematical ability	Lee JJ, Nat Genet, 2018; Evangelou E, Nat Genet, 2018	FBXL17
168	107570359	5	rs552690895	G	A	0.984178	-0.0428127	0.00763643	2.5e-08	0.984198	-0.0322454	0.0104723	0.002	0.984158	-0.054453	0.0111759	1.5e-06					intelligence	Davies G, Nat Commun, 2018	FBXL17
169	110807127	5	rs116461345	G	C	0.986164	-0.0253209	0.00849971	0.003	0.985579	-0.0471319	0.0114591	3.7e-05	0.986753	-0.00619361	0.012667	0.68	0.985579	-0.0471319	0.0114591	0.0152174	-	-	CAMK4; STARD4
170	112076291	5	rs11950732	G	A	0.833278	-0.008364	0.00249598	0.00085	0.835945	-0.0136235	0.00346503	7.7e-05	0.83059	-0.0035952	0.00360886	0.34	0.835945	-0.0136235	0.00346503	0.0423535	heel bone mineral density	Morris JA, Nat Genet, 2018; Kichaev G, Am J Hum Genet, 2018; Kim SK, PLoS One, 2018	APC
171	113802642	5	rs4705506	A	G	0.515138	0.00391791	0.00185002	0.032	0.518547	0.0101947	0.00255889	5.4e-05	0.511702	-0.0020451	0.00268449	0.4					autism spectrum disorder; mucocutaneous lymph node syndrome, coronary aneurysm; mathematical ability	Grove J, Nat Genet, 2019; Kim JJ, J Hum Genet, 2013; Lee JJ, Nat Genet, 2018	KCNN2; RP11-492A10.1
172	113803203	5	rs7730205	C	T	0.529659	0.00406977	0.00186606	0.027	0.529826	0.0105023	0.00257573	3.7e-05	0.52949	-0.00230203	0.00271312	0.38					autism spectrum disorder; mucocutaneous lymph node syndrome, coronary aneurysm; mathematical ability	Grove J, Nat Genet, 2019; Kim JJ, J Hum Genet, 2013; Lee JJ, Nat Genet, 2018	KCNN2; RP11-492A10.1
173	113813148	5	rs12515458	T	C	0.553965	0.0048657	0.00186779	0.0079	0.548625	0.0101453	0.00256911	5.7e-05	0.559349	-3.79312e-05	0.00272581	0.95	0.548625	0.0101453	0.00256911	0.0058997	autism spectrum disorder; mucocutaneous lymph node syndrome, coronary aneurysm; mathematical ability; cognitive function measurement; intelligence	Grove J, Nat Genet, 2019; Kim JJ, J Hum Genet, 2013; Lee JJ, Nat Genet, 2018; Davies G, Nat Commun, 2018	KCNN2; RP11-492A10.1
174	115040488	5	rs2431441	T	C	0.379731	0.00749112	0.00192066	8.1e-05	0.378993	0.00955046	0.00265739	0.0003	0.380476	0.00534104	0.00278595	0.049	0.378993	0.00955046	0.00265739	0.268173	response to rifampicin, Tuberculosis, response to efavirenz, HIV infection, drug-induced liver injury	Petros Z, OMICS, 2017	CTC-505O3.3
175	115948103	5	rs143088616	G	A	0.985422	0.00513026	0.00847289	0.59	0.986809	-0.0334686	0.0124169	0.0075	0.984024	0.0338184	0.0116826	0.0067	0.986809	-0.0334686	0.0124169	6.41378e-05	chronotype measurement	Jones SE, Nat Commun, 2019	CTB-118N6.2
176	115948715	5	5:115948715	T	C	0.98103	0.00309052	0.00744271	0.74	0.982696	-0.0307002	0.0109076	0.0052	0.97935	0.0273518	0.0102622	0.015	0.982696	-0.0307002	0.0109076	8.64808e-05	chronotype measurement	Jones SE, Nat Commun, 2019	CTB-118N6.2
177	119168718	5	rs2059834	T	C	0.660248	0.000360247	0.00197353	0.83	0.659854	0.00796452	0.00273025	0.0032	0.660646	-0.00744534	0.00286291	0.0099	0.659854	0.00796452	0.00273025	7.98184e-05	Microalbuminuria	Teumer A, Diabetes, 2015	-
178	119883019	5	rs75225429	A	C	0.898445	0.0103576	0.00311182	0.00093	0.895231	0.00267331	0.00422615	0.51	0.901685	0.0197572	0.00460169	2.7e-05					-	-	PRR16
179	119902341	5	rs76241818	C	G	0.912532	0.00960456	0.00331646	0.0041	0.909532	0.000120022	0.00448303	0.96	0.915556	0.020379	0.00492908	4.8e-05					-	-	PRR16
180	119911331	5	rs113325614	C	T	0.91294	0.00953453	0.00332767	0.0046	0.90974	0.000288933	0.00449397	0.93	0.916166	0.0199933	0.00495094	7.5e-05	0.90974	0.000288933	0.00449397	0.00284124	-	-	PRR16
181	120354859	5	rs112869833	G	A	0.929377	0.0100094	0.00362512	0.006	0.925814	-0.000500493	0.00486294	0.95	0.932969	0.0218107	0.00543436	7.9e-05	0.925814	-0.000500493	0.00486294	0.00194625	eye morphology measurement; word list delayed recall measurement, memory performance	Lee MK, PLoS One, 2017; Debette S, Biol Psychiatry, 2014	AC008565.1
182	120569770	5	rs56741642	G	A	0.884811	0.00695316	0.00290953	0.018	0.877233	-0.00381684	0.00389356	0.33	0.892451	0.0182318	0.00437704	2.7e-05					-	-	CTC-546K23.1
183	120575763	5	rs4895172	T	C	0.880669	0.00700895	0.00285983	0.015	0.872067	-0.00313765	0.00381254	0.42	0.889341	0.0179484	0.00432229	2.7e-05					-	-	CTC-546K23.1
184	120585763	5	rs56334538	G	A	0.882664	0.00720878	0.0028845	0.013	0.874552	-0.00322426	0.00385349	0.41	0.890842	0.0183489	0.00434847	2e-05					-	-	CTC-546K23.1
185	120596943	5	rs73276540	C	T	0.921586	0.00964386	0.00346938	0.0058	0.915847	-0.00249756	0.00461211	0.61	0.927372	0.0231149	0.00525804	7.9e-06					-	-	CTC-546K23.1
186	120597218	5	rs35295368	T	C	0.876777	0.007205	0.00283448	0.012	0.867215	-0.0020954	0.00377318	0.6	0.886416	0.0172206	0.0042927	4.5e-05					-	-	CTC-546K23.1
187	120608532	5	rs73276548	C	T	0.968723	0.0135688	0.0054772	0.014	0.96755	-0.00373754	0.00733493	0.63	0.969906	0.0332664	0.00822403	8.4e-05					-	-	CTC-546K23.1
188	120615244	5	rs6880047	G	A	0.889454	0.00602789	0.00295784	0.045	0.882551	-0.00515488	0.00396033	0.2	0.896413	0.0177129	0.00444625	5.8e-05					-	-	CTC-546K23.1
189	120713370	5	rs700604	G	A	0.812262	-0.00589454	0.00237697	0.011	0.802675	-0.0125356	0.00320801	9.1e-05	0.821928	-0.000509252	0.00354243	0.97					cognitive impairment, cognitive decline measurement	Li QS, PLoS One, 2015	CTC-546K23.1
190	120715120	5	rs711422	C	G	0.814847	-0.00604975	0.00241304	0.01	0.805924	-0.0131577	0.00325623	5e-05	0.823843	-0.000132457	0.00359624	0.89					cognitive impairment, cognitive decline measurement	Li QS, PLoS One, 2015	CTC-546K23.1
191	123415404	5	rs77025842	G	A	0.987145	-0.0390848	0.00870773	8.5e-06	0.988184	-0.0351463	0.012616	0.0058	0.986098	-0.0441759	0.012117	0.00028					age at onset, alcohol dependence	Kapoor M, Drug Alcohol Depend, 2014	-
192	124926921	5	rs79742734	G	T	0.969803	0.0117707	0.00552293	0.031	0.969411	0.0300334	0.007516	7.7e-05	0.970198	-0.00697137	0.00814766	0.43					-	-	RP11-756H20.1
193	125047746	5	rs7726565	G	C	0.933389	0.0156288	0.00377976	3.2e-05	0.93445	0.00950993	0.00524553	0.071	0.93232	0.0216082	0.00546641	4.5e-05					Tuberculosis	Schurz H, Front Genet, 2019	-
194	125054362	5	rs67285507	C	T	0.913035	0.0139144	0.00331926	2.8e-05	0.91379	0.0111901	0.00458096	0.014	0.912274	0.0165395	0.00482668	0.00038					-	-	-
195	125056207	5	rs17485515	C	T	0.912972	0.0135037	0.00331264	4.7e-05	0.913702	0.0106738	0.00457078	0.018	0.912236	0.0163217	0.00481814	0.00045	0.913702	0.0106738	0.00457078	0.389088	-	-	-
196	126940220	5	rs138914593	A	T	0.988498	-0.0352066	0.00939166	0.00019	0.988254	-0.0488558	0.0124847	9e-05	0.988743	-0.0167517	0.0142201	0.22	0.988254	-0.0488558	0.0124847	0.0857866	-	-	-
197	127545470	5	rs73339355	T	G	0.735939	-0.00837954	0.002115	9.3e-05	0.73568	-0.0113131	0.00291351	0.00011	0.736199	-0.00682127	0.00308121	0.029					heel bone mineral density; Varicose veins; red blood cell distribution width; breast carcinoma; carcinoid tumor	Morris JA, Nat Genet, 2018; Fukaya E, Circulation, 2018; Kichaev G, Am J Hum Genet, 2018; Michailidou K, Nature, 2017; Walsh KM, Endocr Relat Cancer, 2010; Kim SK, PLoS One, 2018	SLC12A2
198	129274534	5	rs145852587	C	G	0.985609	0.0312336	0.00781386	6.5e-05	0.983706	0.035939	0.0100438	0.0004	0.987529	0.0280569	0.0123495	0.018	0.983706	0.035939	0.0100438	0.616122	-	-	CHSY3
199	129386625	5	rs144718088	C	A	0.985308	0.0308058	0.00767429	5.8e-05	0.983346	0.0352655	0.00981983	0.00038	0.987287	0.0287917	0.0122047	0.015	0.983346	0.0352655	0.00981983	0.675635	-	-	CHSY3
200	129436381	5	rs116692618	A	G	0.957715	-0.0113608	0.00473532	0.021	0.958851	-0.026616	0.00652499	6.7e-05	0.95657	0.00310707	0.00689706	0.62	0.958851	-0.026616	0.00652499	0.00152179	-	-	CHSY3; RNA5SP191
201	129459452	5	rs7712694	A	T	0.985017	0.0310268	0.00778594	6.8e-05	0.983573	0.0381456	0.0101119	0.0002	0.986473	0.0276699	0.0121347	0.018					-	-	CHSY3; RNA5SP191; HSPA8P4
202	134051404	5	rs1820677	A	G	0.895674	-0.00465652	0.00302008	0.12	0.895918	0.00655171	0.00416979	0.13	0.895427	-0.0169414	0.00438975	0.00025	0.895918	0.00655171	0.00416979	8.50268e-05	-	-	SEC24A; RNU6-1164P; RNU6-757P; CAMLG
203	135897192	5	rs115564984	C	T	0.983852	0.000300627	0.00747382	0.99	0.986223	-0.033208	0.0112195	0.0032	0.981461	0.0251307	0.0101213	0.021	0.986223	-0.033208	0.0112195	9.23188e-05	-	-	-
204	135952964	5	rs139580125	A	T	0.98407	0.00128307	0.00747619	0.9	0.986361	-0.0325961	0.0111438	0.0034	0.98176	0.0266616	0.0101773	0.015	0.986361	-0.0325961	0.0111438	6.99547e-05	-	-	-
205	139119248	5	rs99507	T	A	0.342364	-0.0077515	0.00198996	9.7e-05	0.34988	-0.00993183	0.00271673	0.0003	0.334788	-0.0046505	0.00292737	0.094					forced expiratory volume, response to bronchodilator, chronic obstructive pulmonary disease	Lutz SM, BMC Genet, 2015	CTB-35F21.1; RNU6-236P; CTB-35F21.2
206	139551296	5	rs138047931	C	T	0.986686	-0.0361681	0.00914024	6.5e-05	0.987497	-0.0420052	0.0129812	0.0014	0.985869	-0.0288309	0.0129381	0.017	0.987497	-0.0420052	0.0129812	0.466613	balding measurement; intelligence; cognitive function measurement; self reported educational attainment	Yap CX, Nat Commun, 2018; Hill WD, Mol Psychiatry, 2018; Lee JJ, Nat Genet, 2018; Savage JE, Nat Genet, 2018	CTB-131B5.5; CYSTM1; AC011379.1
207	141245692	5	rs116300341	G	T	0.953842	-0.0190421	0.00475698	7.3e-05	0.958327	-0.0184522	0.00691868	0.0078	0.94932	-0.0190382	0.00660362	0.0037	0.958327	-0.0184522	0.00691868	0.950522	cerebral amyloid deposition measurement; mathematical ability	Li QS, PLoS One, 2015; Lee JJ, Nat Genet, 2018	PCDH1
208	141790107	5	rs427090	G	A	0.524766	-0.00659806	0.00185005	0.00035	0.528135	-0.00981283	0.0025469	9.8e-05	0.521369	-0.00374301	0.00269719	0.15					systolic blood pressure; red blood cell distribution width; FEV/FEC ratio	Giri A, Nat Genet, 2018; Kichaev G, Am J Hum Genet, 2018	AC005592.2
209	141793582	5	rs168810	C	T	0.524069	-0.00655084	0.00184682	0.00036	0.529649	-0.0102535	0.00254777	5e-05	0.518443	-0.00324016	0.00268727	0.2	0.529649	-0.0102535	0.00254777	0.0550986	systolic blood pressure; red blood cell distribution width; FEV/FEC ratio	Giri A, Nat Genet, 2018; Kichaev G, Am J Hum Genet, 2018	AC005592.2
210	141846696	5	rs116642997	G	A	0.98827	-0.0411331	0.00890564	3.4e-06	0.98679	-0.0301073	0.0114648	0.0074	0.989761	-0.0520154	0.0140439	0.00029	0.98679	-0.0301073	0.0114648	0.221121	waist-hip ratio; coronary heart disease; dementia, Alzheimer's disease neuropathologic change; HSV2 virologic severity measurement	Kichaev G, Am J Hum Genet, 2018; Lettre G, PLoS Genet, 2011; Beecham GW, PLoS Genet, 2014; Kleinstein SE, Genes Immun, 2018	AC005592.2
211	143255849	5	rs111591596	C	A	0.980583	-0.0237284	0.00708868	0.00063	0.980185	-0.00726088	0.00963668	0.42	0.980984	-0.0435407	0.0104692	2.4e-05	0.980185	-0.00726088	0.00963668	0.00981914	-	-	-
212	145143045	5	5:145143045	T	G	0.861822	-0.00610411	0.0027176	0.026	0.861765	0.00559326	0.00371539	0.12	0.86188	-0.0173655	0.0039898	6.6e-06	0.861765	0.00559326	0.00371539	2.00038e-05	susceptibility to rheumatic fever measurement	Tian C, Nat Commun, 2017	PRELID2
213	148508041	5	rs113207985	T	C	0.960156	-0.0197617	0.00494346	6.6e-05	0.959065	-0.025696	0.00670319	0.0001	0.961257	-0.0173177	0.00732129	0.024	0.959065	-0.025696	0.00670319	0.392673	-	-	CTC-529P8.1; RN7SKP145; ABLIM3
214	150432446	5	rs17111695	T	C	0.831644	-0.00573459	0.0024797	0.019	0.828791	-0.0138262	0.00340981	4.3e-05	0.83452	0.0019038	0.00361943	0.52	0.828791	-0.0138262	0.00340981	0.00135697	systemic scleroderma, rheumatoid arthritis, myositis, systemic lupus erythematosus; immune system disease; systemic lupus erythematosus; systemic scleroderma; Sjogren syndrome; neutrophil percentage of granulocytes; rheumatoid arthritis; amyotrophic lateral sclerosis	Acosta-Herrera M, Ann Rheum Dis, 2018; Gregersen PK, Ann Neurol, 2012; Alarcon-Riquelme ME, Arthritis Rheumatol, 2015; Gorlova OY, PLoS One, 2018; Langefeld CD, Nat Commun, 2017; Gateva V, Nat Genet, 2009; Lessard CJ, Nat Genet, 2013; Astle WJ, Cell, 2016; Allanore Y, PLoS Genet, 2011; Eyre S, Nat Genet, 2012; Nicolas A, Neuron, 2018	GPX3; TNIP1
215	152925930	5	rs143293815	T	C	0.98819	0.0325406	0.00906179	0.00036	0.986519	0.0468108	0.0116623	7.3e-05	0.989875	0.0168133	0.014298	0.2	0.986519	0.0468108	0.0116623	0.0997383	fatty acid measurement	Comuzzie AG, PLoS One, 2012	GRIA1
216	155293075	5	rs244963	G	A	0.128493	0.00750112	0.00291263	0.0099	0.128949	0.0162613	0.00396791	3.9e-05	0.128034	-0.00111923	0.00429204	0.74	0.128949	0.0162613	0.00396791	0.00260083	hormone measurement	Comuzzie AG, PLoS One, 2012	RNA5SP199; SGCD
217	155293539	5	rs165952	A	G	0.127211	0.00749663	0.00291108	0.01	0.127662	0.0164429	0.00396626	3.2e-05	0.126755	-0.00148015	0.00428921	0.67	0.127662	0.0164429	0.00396626	0.00188962	hormone measurement	Comuzzie AG, PLoS One, 2012	RNA5SP199; SGCD
218	155294143	5	rs244962	C	T	0.128623	0.00758946	0.00291115	0.0092	0.129756	0.0166999	0.00395301	2.3e-05	0.12748	-0.00155641	0.00430474	0.66	0.129756	0.0166999	0.00395301	0.00155894	hormone measurement	Comuzzie AG, PLoS One, 2012	RNA5SP199; SGCD
219	155295001	5	rs77358936	A	G	0.962376	-0.00845911	0.0049394	0.094	0.961014	-0.0261063	0.00666973	9.6e-05	0.96375	0.00989945	0.00734873	0.17					hormone measurement	Comuzzie AG, PLoS One, 2012	RNA5SP199; SGCD
220	155296002	5	rs244961	T	C	0.128024	0.00775662	0.00288316	0.0073	0.128192	0.016766	0.00393459	2e-05	0.127856	-0.00131312	0.00424085	0.7	0.128192	0.016766	0.00393459	0.00155082	hormone measurement	Comuzzie AG, PLoS One, 2012	RNA5SP199; SGCD
221	155296496	5	rs244994	T	C	0.123714	0.00768929	0.00289916	0.0082	0.12471	0.016728	0.00395075	2.2e-05	0.122711	-0.00120401	0.0042709	0.68	0.12471	0.016728	0.00395075	0.00179982	hormone measurement	Comuzzie AG, PLoS One, 2012	RNA5SP199; SGCD
222	155298795	5	rs244992	T	G	0.106641	0.00653881	0.00308789	0.036	0.106371	0.0170841	0.00422166	5.4e-05	0.106913	-0.00401213	0.0045334	0.32	0.106371	0.0170841	0.00422166	0.000562813	hormone measurement	Comuzzie AG, PLoS One, 2012	SGCD
223	155323036	5	rs73810342	T	C	0.920459	0.00547654	0.00355953	0.11	0.919001	-0.00829727	0.00485159	0.087	0.921928	0.0214477	0.00524287	5.7e-05					metastasis measurement, metastatic colorectal cancer, disease progression measurement; hormone measurement	Penney ME, BMC Cancer, 2019; Comuzzie AG, PLoS One, 2012	SGCD
224	156498492	5	rs147848318	A	C	0.957322	-0.00161742	0.00469289	0.78	0.960491	-0.0214916	0.00676183	0.0014	0.954127	0.0172637	0.0065624	0.01	0.960491	-0.0214916	0.00676183	3.10689e-05	low density lipoprotein cholesterol measurement; total cholesterol measurement; triglyceride measurement; asymmetrical dimethylarginine measurement, serum dimethylarginine measurement; hepatitis A virus cellular receptor 2 measurement; blood protein measurement	Hoffmann TJ, Nat Genet, 2018; Seppala I, Eur Heart J, 2013; Surakka I, Nat Genet, 2015; Suhre K, Nat Commun, 2017; Sun BB, Nature, 2018	HAVCR1; HAVCR2
225	156915821	5	rs11466799	C	T	0.977233	-0.013586	0.00657892	0.04	0.97705	-0.0355335	0.00900953	6.8e-05	0.977417	0.00990124	0.00964205	0.29	0.97705	-0.0355335	0.00900953	0.000488678	forced expiratory volume; FEV/FEC ratio; ; psoriasis; pulmonary function measurement, smoking behaviour measurement, FEV/FEC ratio; pulmonary function measurement, FEV/FEC ratio; chronic obstructive pulmonary disease; blood protein measurement	Shrine N, Nat Genet, 2019; Baurecht H, Am J Hum Genet, 2015; Hancock DB, PLoS Genet, 2012; Hancock DB, Nat Genet, 2009; Hobbs BD, Nat Genet, 2017; Wain LV, Nat Genet, 2017; Emilsson V, Science, 2018	ADAM19; NIPAL4
226	156963010	5	rs10078120	A	T	0.9502	0.0157056	0.00434607	0.00029	0.947893	0.00857188	0.00589313	0.13	0.952525	0.0258027	0.00643768	6.1e-05	0.947893	0.00857188	0.00589313	0.0455662	FEV/FEC ratio; forced expiratory volume; ; mental or behavioural disorder; psoriasis; bipolar disorder, body mass index	Kichaev G, Am J Hum Genet, 2018; Shrine N, Nat Genet, 2019; Wang KS, Schizophr Res, 2010; Baurecht H, Am J Hum Genet, 2015; Winham SJ, Mol Psychiatry, 2013	ADAM19
227	156979644	5	rs143939363	G	A	0.976799	-0.0122386	0.00661375	0.066	0.976905	-0.0369011	0.00909959	4.3e-05	0.976692	0.0131531	0.00964707	0.16	0.976905	-0.0369011	0.00909959	0.000132094	bipolar disorder, body mass index	Winham SJ, Mol Psychiatry, 2013	ADAM19; AC106801.1
228	156990902	5	rs11465268	C	T	0.989464	-0.022542	0.0102791	0.026	0.989642	-0.0600128	0.0141601	2e-05	0.989284	0.014229	0.0149751	0.34	0.989642	-0.0600128	0.0141601	0.000264074	bipolar disorder, body mass index	Winham SJ, Mol Psychiatry, 2013	ADAM19; AC106801.1; RNU6-390P
229	157021658	5	rs115136606	A	G	0.978129	-0.0113948	0.00678077	0.096	0.97847	-0.036164	0.00934425	9.8e-05	0.977786	0.0135513	0.00987496	0.16	0.97847	-0.036164	0.00934425	0.000212673	-	-	ADAM19; RNU6-390P; AC008694.2
230	159676328	5	rs192880513	G	A	0.970408	-0.0178679	0.00582575	0.0018	0.968673	-0.0296409	0.00777254	9.5e-05	0.972157	-0.00449357	0.0087861	0.69	0.968673	-0.0296409	0.00777254	0.0299382	BMI-adjusted waist circumference	Shungin D, Nature, 2015	FABP6; RP11-34P1.1; CCNJL; RP11-34P1.2
231	159720765	5	rs75465622	A	C	0.963551	-0.019661	0.00509646	0.00011	0.959797	-0.0261308	0.00669013	7e-05	0.967337	-0.00978058	0.00784132	0.24					-	-	CCNJL; RN7SL295P
232	159721858	5	rs79877202	G	A	0.970725	-0.0216658	0.00561856	9.2e-05	0.968282	-0.0319304	0.00746305	1.3e-05	0.973187	-0.00818228	0.00851899	0.39					-	-	CCNJL; RN7SL295P
233	159725238	5	rs117258645	G	A	0.970661	-0.0216036	0.0056112	9.5e-05	0.968256	-0.0320297	0.00745184	1.2e-05	0.973086	-0.00790873	0.0085096	0.41	0.968256	-0.0320297	0.00745184	0.0308126	-	-	CCNJL; RN7SL295P
234	161798517	5	rs77289926	G	A	0.967798	-0.0173504	0.00527282	0.0011	0.969878	-0.00107724	0.0075695	0.94	0.965702	-0.0281005	0.00739492	6.4e-05					-	-	-
235	163426721	5	rs193078910	A	G	0.956841	-0.0169972	0.0046534	0.00023	0.962573	-0.00681199	0.00698623	0.34	0.951062	-0.0230222	0.00630636	9.7e-05	0.962573	-0.00681199	0.00698623	0.0811143	-	-	-
236	163428927	5	rs113514060	T	C	0.956065	-0.0171533	0.00456506	0.00016	0.961437	-0.00673559	0.00679876	0.33	0.950649	-0.0233758	0.00622228	6.3e-05	0.961437	-0.00673559	0.00679876	0.0674752	-	-	-
237	163429729	5	rs113338104	T	C	0.972606	-0.0223655	0.00578529	0.0001	0.976394	-0.0108241	0.0086087	0.21	0.968787	-0.0296863	0.00788862	7.9e-05	0.976394	-0.0108241	0.0086087	0.101848	-	-	-
238	163430608	5	rs113818709	C	T	0.956888	-0.0181584	0.00457559	6.7e-05	0.962484	-0.00801291	0.00681652	0.25	0.951247	-0.0240837	0.00623588	4.1e-05	0.962484	-0.00801291	0.00681652	0.0781259	-	-	-
239	163430683	5	rs111248672	A	G	0.955789	-0.0175893	0.00448295	8.2e-05	0.961267	-0.00795968	0.00664375	0.24	0.950267	-0.0233107	0.00613322	5.3e-05	0.961267	-0.00795968	0.00664375	0.0855444	-	-	-
240	163466117	5	rs113182450	C	T	0.974319	-0.0247312	0.00607866	4.4e-05	0.976199	-0.0143654	0.00862747	0.098	0.972424	-0.0327115	0.00861082	8.6e-05	0.976199	-0.0143654	0.00862747	0.127428	-	-	-
241	164219350	5	rs13163455	G	A	0.45876	-0.00752449	0.00189496	5.7e-05	0.453804	-0.00587076	0.00262179	0.021	0.463756	-0.00967416	0.00274924	0.00058	0.453804	-0.00587076	0.00262179	0.31061	-	-	CTC-340A15.2
242	164834993	5	rs191302488	C	A	0.980849	-0.0223143	0.00699366	0.0012	0.983037	-0.0404504	0.0103101	7.8e-05	0.978644	-0.0093933	0.00959995	0.32	0.983037	-0.0404504	0.0103101	0.0255702	-	-	CTC-535M15.2
243	165399253	5	rs143607297	G	A	0.983772	-0.00673304	0.00751839	0.35	0.983737	-0.0409197	0.0103757	0.0001	0.983808	0.0218446	0.0109333	0.049	0.983737	-0.0409197	0.0103757	2.47386e-05	response to sulfonylurea, QT interval; sleep apnea measurement; intelligence; mathematical ability; body weight; waist circumference; cognitive function measurement	Floyd JS, Pharmacogenomics J, 2016; Chen H, Am J Respir Cell Mol Biol, 2017; Hill WD, Mol Psychiatry, 2018; Lee JJ, Nat Genet, 2018; Croteau-Chonka DC, Obesity (Silver Spring), 2010; Davies G, Nat Commun, 2018; Savage JE, Nat Genet, 2018	-
244	165486192	5	rs11952353	A	C	0.984083	-0.0119324	0.00747501	0.1	0.983453	-0.0446378	0.0101366	1.2e-05	0.984718	0.016665	0.0110695	0.14	0.983453	-0.0446378	0.0101366	3.53039e-05	intelligence; cognitive function measurement	Hill WD, Mol Psychiatry, 2018; Lee JJ, Nat Genet, 2018; Davies G, Nat Commun, 2018; Savage JE, Nat Genet, 2018	-
245	165492862	5	rs78384894	T	A	0.983044	-0.0114169	0.00724893	0.1	0.982507	-0.0420928	0.00990397	2.3e-05	0.983586	0.0148884	0.01065	0.17					intelligence; cognitive function measurement	Hill WD, Mol Psychiatry, 2018; Lee JJ, Nat Genet, 2018; Davies G, Nat Commun, 2018; Savage JE, Nat Genet, 2018	-
246	165520805	5	rs11957419	T	C	0.981267	-0.0104614	0.00696844	0.12	0.98004	-0.0409646	0.00931776	1.1e-05	0.982504	0.0185762	0.010482	0.072	0.98004	-0.0409646	0.00931776	1.71362e-05	intelligence	Davies G, Nat Commun, 2018; Savage JE, Nat Genet, 2018	-
247	165529761	5	rs138847153	C	T	0.983168	-0.012532	0.00726724	0.075	0.981945	-0.0409931	0.00968829	2.4e-05	0.9844	0.0141837	0.0109691	0.2	0.981945	-0.0409931	0.00968829	0.000134552	-	-	-
248	165538445	5	rs12109234	G	A	0.98204	-0.0112136	0.0071787	0.11	0.980879	-0.0421087	0.00959422	1.3e-05	0.98321	0.017744	0.0108042	0.099	0.980879	-0.0421087	0.00959422	2.73089e-05	-	-	RP11-67M9.1
249	165563990	5	rs114663434	A	T	0.98185	-0.00756854	0.00713948	0.27	0.980703	-0.0368069	0.00953561	0.00013	0.983007	0.019448	0.0107531	0.073	0.980703	-0.0368069	0.00953561	7.37619e-05	-	-	RP11-67M9.1; AC122720.1
250	165600829	5	5:165600829	G	A	0.971073	-0.0159122	0.00580165	0.0052	0.972067	-0.0398173	0.00814253	1.1e-06	0.970071	0.0021812	0.00830128	0.83	0.972067	-0.0398173	0.00814253	0.000254239	-	-	RP11-67M9.1; AC122720.1
251	165602212	5	rs11959032	C	T	0.980178	-0.0159371	0.00685867	0.019	0.979687	-0.0477468	0.00933215	3.3e-07	0.980673	0.0114839	0.0101202	0.24	0.979687	-0.0477468	0.00933215	1.31611e-05	-	-	RP11-67M9.1; AC122720.1
252	165603117	5	rs77635228	C	A	0.981245	-0.015411	0.00702027	0.026	0.980678	-0.047077	0.00955352	9e-07	0.981818	0.0113346	0.0103571	0.27					-	-	RP11-67M9.1; AC122720.1
253	165606659	5	rs11956975	A	C	0.979858	-0.0148022	0.00661499	0.024	0.979813	-0.0434239	0.00906808	1.6e-06	0.979903	0.00846823	0.00968482	0.38	0.979813	-0.0434239	0.00906808	7.461e-05	-	-	RP11-67M9.1; AC122720.1
254	165614455	5	rs116437926	T	A	0.981036	-0.0171897	0.00685734	0.011	0.980596	-0.0461663	0.00929147	6.5e-07	0.981481	0.00733034	0.0101634	0.46	0.980596	-0.0461663	0.00929147	8.34381e-05	-	-	-
255	165635412	5	rs148745229	A	T	0.987801	-0.0222014	0.00853976	0.0093	0.987573	-0.0444753	0.0115114	9.6e-05	0.988031	-0.00110138	0.012728	0.99	0.987573	-0.0444753	0.0115114	0.0104814	-	-	-
256	165640114	5	rs190675758	T	G	0.98782	-0.0277059	0.00877075	0.0016	0.987062	-0.047052	0.0116037	4.6e-05	0.988584	-0.0079352	0.0133563	0.6	0.987062	-0.047052	0.0116037	0.0251661	-	-	-
257	165670755	5	rs138684879	C	T	0.98979	-0.0195948	0.00981349	0.048	0.989869	-0.0539158	0.0136396	9.5e-05	0.98971	0.00688315	0.0141714	0.63	0.989869	-0.0539158	0.0136396	0.00174465	-	-	-
258	165672757	5	rs149645599	G	T	0.989625	-0.0206735	0.00944378	0.03	0.989503	-0.0515631	0.0129558	8.6e-05	0.989748	0.00440166	0.0138156	0.75	0.989503	-0.0515631	0.0129558	0.00276691	-	-	-
259	165676620	5	5:165676620	C	T	0.989562	-0.0216998	0.00942101	0.023	0.989377	-0.0510966	0.0129024	9.3e-05	0.989748	0.00209041	0.0138066	0.88	0.989377	-0.0510966	0.0129024	0.00436566	-	-	-
260	165880794	5	rs73355453	G	A	0.986911	-0.0255496	0.00871101	0.0028	0.987301	-0.0535747	0.0124215	1.9e-05	0.986517	-0.00902854	0.0122855	0.45					age at menarche	Kichaev G, Am J Hum Genet, 2018	-
261	165885023	5	rs73355455	C	G	0.986404	-0.0245253	0.00869505	0.004	0.986809	-0.0525423	0.0124348	2.8e-05	0.985996	-0.00775044	0.0122319	0.51					age at menarche	Kichaev G, Am J Hum Genet, 2018	-
262	165902636	5	rs11958953	G	T	0.987586	-0.0245751	0.00892302	0.0049	0.988651	-0.0545838	0.0129527	2.9e-05	0.986511	-0.00786865	0.0123972	0.52	0.988651	-0.0545838	0.0129527	0.008321	age at menarche	Kichaev G, Am J Hum Genet, 2018	-
263	165914242	5	rs147402919	G	A	0.987066	-0.0260698	0.00876007	0.0023	0.988172	-0.0551961	0.0127143	1.6e-05	0.985951	-0.0108971	0.0121723	0.37	0.988172	-0.0551961	0.0127143	0.0108072	age at menarche; heel bone mineral density	Kichaev G, Am J Hum Genet, 2018	-
264	166900671	5	rs12515748	T	G	0.257031	-0.00862808	0.00211751	3.6e-05	0.257885	-0.011018	0.00291138	0.00014	0.256169	-0.00572635	0.00309088	0.061	0.257885	-0.011018	0.00291138	0.206906	-	-	TENM2
265	166911656	5	rs6555752	T	C	0.147628	-0.0109342	0.00261575	2.3e-05	0.150416	-0.0103824	0.00357367	0.0037	0.144817	-0.0106956	0.00384352	0.0038					-	-	TENM2
266	166913157	5	rs6555754	A	T	0.196713	-0.0101724	0.00234173	9.1e-06	0.19865	-0.00887811	0.0032174	0.0055	0.19476	-0.0108942	0.00342073	0.0009					-	-	TENM2
267	166915827	5	rs6555757	T	C	0.149987	-0.010606	0.00259403	3.3e-05	0.152031	-0.00982418	0.00354724	0.0056	0.147927	-0.0106652	0.00380774	0.0037					-	-	TENM2
268	168688650	5	rs11134564	A	G	0.921016	0.0135425	0.00345111	8.7e-05	0.9243	0.014963	0.00479261	0.0019	0.917705	0.0127618	0.00498916	0.013	0.9243	0.014963	0.00479261	0.747272	-	-	SLIT3; MIR585
269	168690391	5	rs11134566	G	A	0.921016	0.0135425	0.00345111	8.7e-05	0.9243	0.014963	0.00479261	0.0019	0.917705	0.0127618	0.00498916	0.013	0.9243	0.014963	0.00479261	0.747272	-	-	SLIT3; MIR585
270	171811966	5	rs73804823	C	A	0.922501	-0.00978719	0.003566	0.0061	0.920963	0.00226978	0.00488714	0.68	0.924052	-0.023131	0.00522263	1.6e-05					-	-	SH3PXD2B
271	171852581	5	rs111518134	A	C	0.985068	-0.0216059	0.00830275	0.0093	0.984532	0.0066185	0.0112595	0.57	0.985608	-0.0491074	0.0122948	6.4e-05	0.984532	0.0066185	0.0112595	0.00071147	balding measurement; waist-hip ratio	Kichaev G, Am J Hum Genet, 2018; Yap CX, Nat Commun, 2018	SH3PXD2B; AC011407.1
272	171852634	5	rs115705326	G	C	0.985068	-0.0216059	0.00830275	0.0093	0.984532	0.0066185	0.0112595	0.57	0.985608	-0.0491074	0.0122948	6.4e-05	0.984532	0.0066185	0.0112595	0.00071147	balding measurement; waist-hip ratio	Kichaev G, Am J Hum Genet, 2018; Yap CX, Nat Commun, 2018	SH3PXD2B; AC011407.1
273	172985966	5	5:172985966	A	G	0.986943	-0.0195112	0.00841103	0.022	0.988531	-0.0490979	0.012391	9.8e-05	0.985341	0.00481073	0.0115505	0.7	0.988531	-0.0490979	0.012391	0.00126878	heel bone mineral density; body height; urate measurement, overweight body mass index status; sitting height ratio; BMI-adjusted hip circumference	Morris JA, Nat Genet, 2018; Lango Allen H, Nature, 2010; Kichaev G, Am J Hum Genet, 2018; Huffman JE, PLoS One, 2015; Chan Y, Am J Hum Genet, 2015; Shungin D, Nature, 2015; He M, Hum Mol Genet, 2014; Kim SK, PLoS One, 2018	CTB-33O18.1; CTB-33O18.2; CTB-33O18.3
274	172996808	5	rs116797041	C	T	0.98757	-0.021821	0.0086225	0.012	0.989049	-0.05233	0.0126793	4.9e-05	0.986079	0.00345009	0.0118575	0.81	0.989049	-0.05233	0.0126793	0.00113745	heel bone mineral density; body height; alcohol dependence measurement; urate measurement, overweight body mass index status; sitting height ratio; BMI-adjusted hip circumference; adolescent idiopathic scoliosis	Morris JA, Nat Genet, 2018; Lango Allen H, Nature, 2010; Kichaev G, Am J Hum Genet, 2018; Chen G, Addict Biol, 2016; Huffman JE, PLoS One, 2015; Chan Y, Am J Hum Genet, 2015; Shungin D, Nature, 2015; He M, Hum Mol Genet, 2014; Liu J, Hum Genet, 2018; Kim SK, PLoS One, 2018	CTB-33O18.1; CTB-33O18.2; CTB-33O18.3
181	123887259	10	rs10887089	C	G	0.892437	0.00153117	0.00300608	0.65	0.889648	-0.0127498	0.00407493	0.0017	0.895249	0.0149034	0.00445671	0.00047	0.889648	-0.0127498	0.00407493	3.52646e-06	schizophrenia; hepcidin:ferritin ratio	Goes FS, Am J Med Genet B Neuropsychiatr Genet, 2015; Galesloot TE, PLoS One, 2016	TACC2
276	173007836	5	rs12152984	T	C	0.831771	-0.0095409	0.00247455	8.9e-05	0.830305	-0.010222	0.00339453	0.0023	0.833249	-0.00885799	0.00362048	0.012	0.830305	-0.010222	0.00339453	0.780749	heel bone mineral density; body height; alcohol dependence measurement; urate measurement, overweight body mass index status; sitting height ratio; BMI-adjusted hip circumference; adolescent idiopathic scoliosis	Morris JA, Nat Genet, 2018; Lango Allen H, Nature, 2010; Kichaev G, Am J Hum Genet, 2018; Chen G, Addict Biol, 2016; Huffman JE, PLoS One, 2015; Rueger S, PLoS Genet, 2018; Chan Y, Am J Hum Genet, 2015; Shungin D, Nature, 2015; He M, Hum Mol Genet, 2014; Liu J, Hum Genet, 2018; Kim SK, PLoS One, 2018	CTB-33O18.1; CTB-33O18.2; CTB-33O18.3
277	173119599	5	rs375073604	T	C	0.988406	-0.0245632	0.00902815	0.0065	0.989326	-0.0568457	0.012896	1.4e-05	0.987478	0.00216386	0.012715	0.9					waist-hip ratio; disease free survival, rectum cancer; adolescent idiopathic scoliosis	Kichaev G, Am J Hum Genet, 2018; Xu W, Biomark Res, 2015; Liu J, Hum Genet, 2018	CTB-43E15.2; CTB-43E15.3
278	173157103	5	rs115477952	C	T	0.985898	-0.0231483	0.00823015	0.0044	0.98662	-0.0506606	0.0117304	1.7e-05	0.985169	-0.000375485	0.0116126	0.95	0.98662	-0.0506606	0.0117304	0.00203311	waist-hip ratio	Kichaev G, Am J Hum Genet, 2018	CTB-43E15.2; CTB-43E15.3; AC008674.1
279	173158629	5	rs115042974	C	T	0.985704	-0.0234185	0.00823299	0.004	0.98638	-0.0503608	0.0117343	1.9e-05	0.985023	-0.00113897	0.0116166	0.9	0.98638	-0.0503608	0.0117343	0.00253534	waist-hip ratio	Kichaev G, Am J Hum Genet, 2018	CTB-43E15.3; AC008674.1
280	174553094	5	5:174553094	T	C	0.967646	-0.0263578	0.0065948	6.2e-05	0.96784	-0.0296357	0.00935654	0.0015	0.967451	-0.0290218	0.00934245	0.0032	0.96784	-0.0296357	0.00935654	0.962495	-	-	-
281	174688180	5	rs142430965	T	G	0.973097	-0.0135115	0.00599192	0.026	0.975164	0.0092519	0.00863967	0.27	0.971012	-0.0315985	0.00837269	9e-05	0.975164	0.0092519	0.00863967	0.000584359	venous thromboembolism; reaction time measurement	Heit JA, Thromb Haemost, 2017; Davies G, Nat Commun, 2018	-
282	174688676	5	rs140252014	C	T	0.97748	-0.0164873	0.00647911	0.013	0.979908	0.00637158	0.0095049	0.48	0.975032	-0.0341284	0.00892822	8.5e-05	0.979908	0.00637158	0.0095049	0.00165923	venous thromboembolism; reaction time measurement	Heit JA, Thromb Haemost, 2017; Davies G, Nat Commun, 2018	-
283	176048870	5	rs368173163	C	A	0.983658	0.0295828	0.0074012	7.5e-05	0.985737	0.032573	0.0110387	0.0031	0.981563	0.0223361	0.0100696	0.021					-	-	GPRIN1; SNCB; MIR4281; EIF4E1B
284	177758018	5	rs6879500	G	A	0.981597	-0.0220984	0.00726533	0.0025	0.984381	-0.00171727	0.0109061	0.91	0.97879	-0.0374051	0.00984113	9.8e-05					cannabis dependence measurement; DNA methylation; blood protein measurement	Sherva R, JAMA Psychiatry, 2016; Zhang Q, Genome Med, 2018; Emilsson V, Science, 2018	COL23A1; RP11-1259L22.2; RP11-1259L22.1
285	177758653	5	rs6896542	C	T	0.981505	-0.0217731	0.00718964	0.0026	0.984128	-0.00100188	0.0106531	0.96	0.97886	-0.0375403	0.00983269	9e-05					cannabis dependence measurement; DNA methylation; blood protein measurement	Sherva R, JAMA Psychiatry, 2016; Zhang Q, Genome Med, 2018; Emilsson V, Science, 2018	COL23A1; RP11-1259L22.2; RP11-1259L22.1
286	177760637	5	rs115477123	C	T	0.976393	-0.026343	0.00662715	7.2e-05	0.979107	-0.0121649	0.00968249	0.23	0.973658	-0.0384208	0.00916347	1.8e-05	0.979107	-0.0121649	0.00968249	0.0460827	cannabis dependence measurement; DNA methylation; blood protein measurement	Sherva R, JAMA Psychiatry, 2016; Zhang Q, Genome Med, 2018; Emilsson V, Science, 2018	COL23A1; RP11-1259L22.2; RP11-1259L22.1
287	177953359	5	rs549345555	G	A	0.98401	0.0331997	0.00754738	8.1e-06	0.984929	0.0370101	0.0107783	0.00059	0.983083	0.0308845	0.0106312	0.0038					balding measurement; prostate carcinoma; antiphospholipid antibody measurement; blood protein measurement	Yap CX, Nat Commun, 2018; Schumacher FR, Nat Genet, 2018; Muller-Calleja N, Thromb Haemost, 2016; Emilsson V, Science, 2018	COL23A1
288	177953474	5	rs150741746	C	A	0.971241	0.0241624	0.00571599	2.1e-05	0.971833	0.0207066	0.00803049	0.009	0.970644	0.0252746	0.00817056	0.002	0.971833	0.0207066	0.00803049	0.686341	balding measurement; prostate carcinoma; antiphospholipid antibody measurement; blood protein measurement	Yap CX, Nat Commun, 2018; Schumacher FR, Nat Genet, 2018; Muller-Calleja N, Thromb Haemost, 2016; Emilsson V, Science, 2018	COL23A1
289	178423572	5	rs73804517	A	G	0.875272	-0.0104122	0.00292017	0.0004	0.877025	-0.0175451	0.00402935	1.5e-05	0.873505	-0.00212465	0.00424741	0.52					body height	Cousminer DL, Hum Mol Genet, 2013	RP11-281O15.4; GRM6; RP11-281O15.5
290	178651364	5	rs114299344	C	A	0.981521	-0.0203033	0.00729074	0.0053	0.981769	-0.0433762	0.010165	2.2e-05	0.981271	0.0003786	0.0104967	0.94	0.981769	-0.0433762	0.010165	0.00242381	Astigmatism; stroke; central corneal thickness	Shah RL, Hum Genet, 2018; Arning A, Blood, 2012; Iglesias AI, Nat Commun, 2018	ADAMTS2
291	180039877	5	rs78748339	C	T	0.96301	-0.0137204	0.00488995	0.0061	0.961014	-0.0268626	0.00651684	4e-05	0.965022	0.0007238	0.00738399	0.9					BMI-adjusted waist-hip ratio; folic acid measurement; blood protein measurement	Justice AE, Nat Genet, 2019; Deng C, Gene, 2018; Sun BB, Nature, 2018; Emilsson V, Science, 2018	SCGB3A1; FLT4
292	180049525	5	rs2242210	T	C	0.465898	0.00718704	0.00192317	0.00023	0.459437	0.0114537	0.00264566	1.5e-05	0.472412	0.00273022	0.00280659	0.38	0.459437	0.0114537	0.00264566	0.0219884	folic acid measurement; blood protein measurement	Deng C, Gene, 2018; Sun BB, Nature, 2018; Emilsson V, Science, 2018	FLT4
293	180058008	5	rs307820	C	A	0.361626	-0.0036897	0.00226473	0.11	0.360484	-0.0128244	0.00312516	4.4e-05	0.362777	0.0043784	0.0032937	0.13					blood protein measurement	Sun BB, Nature, 2018; Emilsson V, Science, 2018	FLT4
294	180083479	5	rs112967731	G	A	0.915094	-0.00925355	0.0034209	0.0071	0.911752	-0.0231208	0.00463629	5.7e-07	0.918462	0.00464493	0.00507037	0.34	0.911752	-0.0231208	0.00463629	4.2636e-05	-	-	FLT4; RP11-451H23.2
295	180107753	5	rs139379075	T	C	0.956923	-0.0104261	0.00464196	0.023	0.958113	-0.0306672	0.00651805	2e-06	0.955724	0.00831345	0.00663892	0.23	0.958113	-0.0306672	0.00651805	2.20275e-05	-	-	RP11-451H23.2; RP11-451H23.3; OR2AI1P
296	180116433	5	5:180116433	A	G	0.636189	-0.00596487	0.00199506	0.0024	0.635056	-0.0106063	0.00274143	9.8e-05	0.637331	-0.00153332	0.00291385	0.5	0.635056	-0.0106063	0.00274143	0.0216337	-	-	RP11-451H23.2; RP11-451H23.3; OR2AI1P
297	180117789	5	rs4700975	G	A	0.717482	-0.00676743	0.0020923	0.0011	0.714471	-0.0123066	0.0028917	1.6e-05	0.720516	-0.00124266	0.00303847	0.65					-	-	RP11-451H23.2; RP11-451H23.3; OR2AI1P
298	180118217	5	rs10063270	G	A	0.717149	-0.00675773	0.00209029	0.0011	0.714219	-0.0122275	0.00288781	1.8e-05	0.720103	-0.00124203	0.00303668	0.65	0.714219	-0.0122275	0.00288781	0.00793272	-	-	RP11-451H23.2; RP11-451H23.3; OR2AI1P
299	180119677	5	rs10069994	C	T	0.720778	-0.00674409	0.00207892	0.001	0.71801	-0.011892	0.00287264	2.7e-05	0.723569	-0.00159415	0.00301957	0.56	0.71801	-0.011892	0.00287264	0.0123359	-	-	RP11-451H23.2; RP11-451H23.3; OR2AI1P
300	180120192	5	rs7731780	G	T	0.724158	-0.00675083	0.00205359	0.00086	0.721549	-0.0117284	0.00283358	2.7e-05	0.726787	-0.00171086	0.00298701	0.53					-	-	RP11-451H23.2; RP11-451H23.3; OR2AI1P
301	180120738	5	rs10073529	C	G	0.722232	-0.00678077	0.00205843	0.00084	0.719871	-0.0117821	0.00284054	2.6e-05	0.724612	-0.00173106	0.00299373	0.53	0.719871	-0.0117821	0.00284054	0.0136411	-	-	RP11-451H23.2; RP11-451H23.3; OR2AI1P
302	180122392	5	rs3912996	T	C	0.720991	-0.00698245	0.00205595	0.00058	0.718647	-0.0121476	0.00283771	1.4e-05	0.723353	-0.00176253	0.00298947	0.52					-	-	RP11-451H23.2; RP11-451H23.3; OR2AI1P
303	180122659	5	rs6886483	A	C	0.721073	-0.00699564	0.00205636	0.00057	0.718742	-0.0121747	0.0028383	1.4e-05	0.723423	-0.00176435	0.00299005	0.52					-	-	RP11-451H23.2; RP11-451H23.3; OR2AI1P
304	180124139	5	rs78333629	T	G	0.721016	-0.00699678	0.00205635	0.00057	0.718679	-0.0121517	0.00283787	1.4e-05	0.723372	-0.00178127	0.00299047	0.52					-	-	RP11-451H23.2; RP11-451H23.3; OR2AI1P
305	180130096	5	rs552592397	A	C	0.944705	-0.0150584	0.00506972	0.0026	0.943023	-0.0290504	0.00683676	1.5e-05	0.9464	-0.000217118	0.0075539	0.92					-	-	RP11-451H23.3; OR2AI1P
306	180505628	5	rs12659414	A	T	0.932607	0.00789104	0.00426815	0.065	0.932949	0.0228878	0.0058701	7e-05	0.932263	-0.00580858	0.00622813	0.36	0.932949	0.0228878	0.0058701	0.000684456	-	-	BTNL9; CTB-14A14.1; FOXO1B
307	180662561	5	rs114518255	T	C	0.975637	0.0245956	0.00621305	8.8e-05	0.975997	0.019257	0.00860341	0.023	0.975273	0.0298207	0.00900478	0.0016	0.975997	0.019257	0.00860341	0.390321	age at menarche; waist-hip ratio; hair colour measurement	Kichaev G, Am J Hum Genet, 2018	TRIM41; MIR4638; CTC-338M12.7; GNB2L1; SNORD96A; SNORD95; CTC-338M12.4; TRIM52; AC008443.1
1	17648486	22	rs5748925	A	G	0.0310014	-0.0231707	0.0055205	2.9e-05	0.0313525	-0.0277959	0.00755138	0.00025	0.0306474	-0.0225933	0.00810609	0.007					blood protein measurement	Sun BB, Nature, 2018; Emilsson V, Science, 2018	CECR5; CECR5-AS1; CECR1
2	18919299	22	rs146609710	C	G	0.981594	0.0279912	0.00720906	7.7e-05	0.982229	0.0166557	0.0101781	0.1	0.980953	0.0377095	0.0102653	0.00015	0.982229	0.0166557	0.0101781	0.140204	heel bone mineral density; proline measurement; alanine measurement, amino acid measurement; proline measurement, amino acid measurement; histidine measurement, amino acid measurement; amino acid measurement; leucine measurement, amino acid measurement; phenylalanine measurement, amino acid measurement; amino acid measurement, threonine measurement; tyrosine measurement, amino acid measurement; b…	Kichaev G, Am J Hum Genet, 2018; Imaizumi A, Eur J Hum Genet, 2019; Draisma HHM, Nat Commun, 2015; Li Y, J Am Soc Nephrol, 2018; Kim SK, PLoS One, 2018	DGCR6; PRODH
3	18923812	22	rs569881481	G	A	0.977765	0.0268304	0.00670808	4.6e-05	0.9784	0.0179217	0.00945958	0.056	0.977124	0.0345233	0.00956227	0.0002					heel bone mineral density; proline measurement; alanine measurement, amino acid measurement; proline measurement, amino acid measurement; histidine measurement, amino acid measurement; amino acid measurement; leucine measurement, amino acid measurement; phenylalanine measurement, amino acid measurement; amino acid measurement, threonine measurement; tyrosine measurement, amino acid measurement; b…	Kichaev G, Am J Hum Genet, 2018; Imaizumi A, Eur J Hum Genet, 2019; Draisma HHM, Nat Commun, 2015; Li Y, J Am Soc Nephrol, 2018; Kim SK, PLoS One, 2018	DGCR6; PRODH
4	18936724	22	rs12168630	G	A	0.976517	0.0279358	0.00658964	1.7e-05	0.976848	0.0182689	0.00920089	0.045	0.976183	0.0363496	0.00948063	8.8e-05	0.976848	0.0182689	0.00920089	0.165731	proline measurement; alanine measurement, amino acid measurement; proline measurement, amino acid measurement; histidine measurement, amino acid measurement; amino acid measurement; leucine measurement, amino acid measurement; phenylalanine measurement, amino acid measurement; amino acid measurement, threonine measurement; tyrosine measurement, amino acid measurement; blood metabolite measurement…	Imaizumi A, Eur J Hum Genet, 2019; Draisma HHM, Nat Commun, 2015; Shin SY, Nat Genet, 2014	PRODH; DGCR5
5	18938200	22	rs28374131	G	A	0.978309	0.0299282	0.00668682	5.3e-06	0.977933	0.0215966	0.00918043	0.018	0.978689	0.0374344	0.00978175	8.2e-05					proline measurement; alanine measurement, amino acid measurement; proline measurement, amino acid measurement; histidine measurement, amino acid measurement; amino acid measurement; leucine measurement, amino acid measurement; phenylalanine measurement, amino acid measurement; amino acid measurement, threonine measurement; tyrosine measurement, amino acid measurement; blood metabolite measurement…	Imaizumi A, Eur J Hum Genet, 2019; Draisma HHM, Nat Commun, 2015; Shin SY, Nat Genet, 2014	PRODH; DGCR5
6	18940888	22	rs71328282	A	G	0.979383	0.0328239	0.00707386	2.4e-06	0.978892	0.0224683	0.00965455	0.019	0.979878	0.0433016	0.0104114	1.9e-05					blood metabolite measurement, amino acid measurement; gait measurement; blood metabolite measurement	Draisma HHM, Nat Commun, 2015; Adams HH, J Gerontol A Biol Sci Med Sci, 2015; Shin SY, Nat Genet, 2014	PRODH; DGCR5
7	18943169	22	rs150293293	G	C	0.978373	0.0289933	0.0066887	9.9e-06	0.97816	0.0201998	0.0091942	0.027	0.978587	0.0373881	0.00977228	8.3e-05	0.97816	0.0201998	0.0091942	0.194506	blood metabolite measurement; blood metabolite measurement, amino acid measurement; gait measurement	Shin SY, Nat Genet, 2014; Draisma HHM, Nat Commun, 2015; Adams HH, J Gerontol A Biol Sci Med Sci, 2015	PRODH; DGCR5
8	18943899	22	rs9618427	C	T	0.977597	0.026853	0.00662749	3.5e-05	0.977258	0.0185509	0.00905617	0.039	0.977938	0.0351728	0.00974209	0.00019					blood metabolite measurement; blood metabolite measurement, amino acid measurement; gait measurement	Shin SY, Nat Genet, 2014; Draisma HHM, Nat Commun, 2015; Adams HH, J Gerontol A Biol Sci Med Sci, 2015	PRODH; DGCR5
9	19568535	22	rs187416123	C	T	0.988681	0.0136483	0.0093629	0.16	0.988462	-0.0248329	0.0126381	0.053	0.988902	0.0503939	0.0139439	0.00031	0.988462	-0.0248329	0.0126381	5.16118e-05	serum IgG glycosylation measurement	Lauc G, PLoS Genet, 2013	-
10	19738355	22	rs1005133	C	T	0.979402	-0.00901961	0.00779183	0.24	0.980072	0.0230245	0.0108106	0.037	0.978727	-0.0386008	0.0112798	0.00062	0.980072	0.0230245	0.0108106	6.47858e-05	prostate carcinoma; breast carcinoma; tonsillectomy risk measurement; susceptibility to childhood ear infection measurement; interleukin 10 measurement	Al Olama AA, Nat Genet, 2014; Michailidou K, Nature, 2017; Tian C, Nat Commun, 2017; Tekola Ayele F, Immunogenetics, 2011; Pickrell JK, Nat Genet, 2016	TBX1
11	20053580	22	rs115561292	G	T	0.968729	0.0211505	0.00535825	9.3e-05	0.971272	0.020294	0.00782337	0.01	0.966166	0.0222848	0.00741571	0.0021	0.971272	0.020294	0.00782337	0.85163	cardiovascular disease; adolescent idiopathic scoliosis	Kichaev G, Am J Hum Genet, 2018; Liu J, Hum Genet, 2018	TANGO2; AC006547.13; AC006547.15; DGCR8; MIR3618; MIR1306
12	20058681	22	rs145089673	C	T	0.967836	0.02153	0.00530846	6e-05	0.970641	0.020295	0.00776814	0.0094	0.965009	0.0227829	0.00733408	0.0015	0.970641	0.020295	0.00776814	0.813551	cardiovascular disease	Kichaev G, Am J Hum Genet, 2018	TANGO2; AC006547.13; AC006547.15; DGCR8; MIR3618; MIR1306
13	21320963	22	rs116249925	T	A	0.932493	-0.0128011	0.00400951	0.0015	0.939238	-0.00317659	0.00590565	0.64	0.925693	-0.0203134	0.0055168	7.4e-05	0.939238	-0.00317659	0.00590565	0.0317531	Testicular Germ Cell Tumor; smoking behavior, 3-hydroxypropylmercapturic acid measurement	Litchfield K, Nat Genet, 2017; Park SL, PLoS One, 2015	CRKL; RN7SL389P; XXbac-B135H6.15; AIFM3; LZTR1; XXbac-B135H6.18
14	23055852	22	rs2304531	A	T	0.3613	-0.00798157	0.00221487	0.00029	0.362907	-0.00256567	0.0030327	0.39	0.359679	-0.0128522	0.00324894	8e-05	0.362907	-0.00256567	0.0030327	0.0190793	-	-	LL22NC03-102D1.16; LL22NC03-102D1.18; IGLV3-24; IGLV2-23; D86994.1; IGLVVI-22-1; IGLV3-22; IGLV3-21; IGLVI-20; IGLV3-19; D87007.1; IGLV2-18
15	23717582	22	rs77439942	T	A	0.87512	-0.00744519	0.00295733	0.011	0.877921	-0.0170668	0.00413846	3.6e-05	0.872297	0.00108055	0.00424634	0.85					-	-	CES5AP1; ZDHHC8P1; KB-1269D1.8
16	26440704	22	rs6519637	C	G	0.0676526	0.00792359	0.00376427	0.035	0.0711141	0.019733	0.00506077	9.4e-05	0.0641631	-0.00422779	0.00563306	0.3					adolescent idiopathic scoliosis	Liu J, Hum Genet, 2018	MYO18B
17	26732208	22	rs3788387	T	G	0.755637	0.00409576	0.00216879	0.06	0.759652	-0.00406046	0.0030217	0.18	0.75159	0.012647	0.00312723	5.5e-05					-	-	SEZ6L
18	27211876	22	rs5761770	C	G	0.501036	0.0045731	0.00199266	0.027	0.506081	0.0109058	0.00273132	9e-05	0.495949	-0.0014204	0.00292042	0.65					-	-	-
19	27523968	22	rs147332832	C	T	0.988152	-0.0324633	0.00925586	0.00053	0.986462	-0.0118216	0.0117208	0.32	0.989856	-0.0623169	0.0149517	2.1e-05	0.986462	-0.0118216	0.0117208	0.00712687	-	-	CTA-992D9.7
20	27564246	22	rs116750742	T	G	0.973274	-0.0243633	0.00642694	0.00015	0.972268	-0.0345654	0.00861236	5.5e-05	0.974288	-0.0145359	0.00964984	0.13	0.972268	-0.0345654	0.00861236	0.116828	adolescent idiopathic scoliosis	Liu J, Hum Genet, 2018	CTA-992D9.7
21	27603768	22	rs116730312	G	A	0.973227	-0.0229304	0.0063763	0.00035	0.971972	-0.0373301	0.00851146	1.1e-05	0.974491	-0.00817261	0.00961659	0.4	0.971972	-0.0373301	0.00851146	0.0214926	vital capacity; breast carcinoma, childhood cancer; adolescent idiopathic scoliosis	Kichaev G, Am J Hum Genet, 2018; Morton LM, J Natl Cancer Inst, 2017; Liu J, Hum Genet, 2018	CTA-503F6.2; RP5-1172A22.1
22	30993235	22	rs73396362	G	A	0.984612	-0.0204951	0.00769326	0.0079	0.985415	0.00642849	0.010901	0.54	0.983802	-0.0429437	0.0109193	4.3e-05					Moyamoya disease; blood protein measurement; Nephroblastoma	Duan L, Stroke, 2017; Sun BB, Nature, 2018; Turnbull C, Nat Genet, 2012	GAL3ST1; PES1; RP1-56J10.8; TCN2
23	31012798	22	rs61529572	A	G	0.984333	-0.0184622	0.00761092	0.015	0.985163	0.0104033	0.0107717	0.32	0.983497	-0.0434436	0.010814	3e-05					Moyamoya disease; blood protein measurement; Nephroblastoma	Duan L, Stroke, 2017; Sun BB, Nature, 2018; Turnbull C, Nat Genet, 2012; Emilsson V, Science, 2018	PES1; RP1-56J10.8; TCN2; SLC35E4
24	31176281	22	rs136308	C	T	0.903259	0.0131858	0.00318308	3.7e-05	0.89988	0.0114976	0.00432839	0.0082	0.906665	0.0137999	0.0047042	0.0015	0.89988	0.0114976	0.00432839	0.715306	response to gemcitabine, response to antineoplastic agent; mathematical ability	Low SK, Cancer Sci, 2013; Lee JJ, Nat Genet, 2018	OSBP2
25	31177154	22	rs136304	C	T	0.90337	0.0131016	0.00318365	4.1e-05	0.899975	0.0114714	0.00432894	0.0084	0.906792	0.0136722	0.00470531	0.0016	0.899975	0.0114714	0.00432894	0.727394	response to gemcitabine, response to antineoplastic agent; mathematical ability	Low SK, Cancer Sci, 2013; Lee JJ, Nat Genet, 2018	OSBP2
26	31181735	22	rs136300	T	C	0.903351	0.013007	0.0031768	4.5e-05	0.899786	0.0116364	0.00431871	0.0073	0.906945	0.0133965	0.00469636	0.0019	0.899786	0.0116364	0.00431871	0.779953	mathematical ability	Lee JJ, Nat Genet, 2018	OSBP2
27	31182314	22	rs136299	T	G	0.903284	0.0129775	0.00317691	4.7e-05	0.899729	0.0115687	0.00431889	0.0077	0.906868	0.0134044	0.0046965	0.0019	0.899729	0.0115687	0.00431889	0.770768	mathematical ability	Lee JJ, Nat Genet, 2018	OSBP2
28	31184897	22	rs5753318	G	A	0.903208	0.0131248	0.00317602	3.8e-05	0.899634	0.0118722	0.0043174	0.0062	0.906811	0.0134059	0.00469553	0.0019					mathematical ability	Lee JJ, Nat Genet, 2018	OSBP2
29	31192023	22	rs136287	C	T	0.903433	0.0130538	0.00318096	4.4e-05	0.899836	0.0115678	0.00432058	0.0077	0.907059	0.013531	0.00470694	0.0018	0.899836	0.0115678	0.00432058	0.755667	mathematical ability	Lee JJ, Nat Genet, 2018	OSBP2
30	31193188	22	rs136284	G	A	0.895934	0.0127276	0.00308665	4e-05	0.89231	0.0127986	0.00419588	0.0023	0.899587	0.01158	0.00456338	0.0059	0.89231	0.0127986	0.00419588	0.842203	mathematical ability	Lee JJ, Nat Genet, 2018	OSBP2
31	32999059	22	rs16990824	T	C	0.912719	-0.00647458	0.00331955	0.052	0.912945	-0.0184989	0.00455328	4.5e-05	0.91249	0.00592061	0.00486046	0.22	0.912945	-0.0184989	0.00455328	0.000204577	FEV/FEC ratio	Kichaev G, Am J Hum Genet, 2018	SYN3; LL22NC03-104C7.1
32	33461798	22	rs12484484	G	A	0.97088	-0.00153235	0.00567707	0.81	0.971467	0.0213926	0.00779312	0.0056	0.970287	-0.0236095	0.00830583	0.0037	0.971467	0.0213926	0.00779312	6.29205e-05	-	-	SYN3
33	33468005	22	rs16991758	C	A	0.966769	-0.00177776	0.00530774	0.75	0.967108	0.0195798	0.00726077	0.0068	0.966427	-0.0234248	0.0077932	0.0024	0.967108	0.0195798	0.00726077	4.33426e-05	response to bronchodilator, chronic obstructive pulmonary disease, FEV/FEC ratio; forced expiratory volume, response to bronchodilator, chronic obstructive pulmonary disease	Lutz SM, BMC Genet, 2015	SYN3
34	33474244	22	rs16991760	A	T	0.966807	-0.00163802	0.00530769	0.77	0.967499	0.0194434	0.00729117	0.0075	0.966109	-0.0226479	0.0077599	0.0033	0.967499	0.0194434	0.00729117	6.24324e-05	response to bronchodilator, chronic obstructive pulmonary disease, FEV/FEC ratio; forced expiratory volume, response to bronchodilator, chronic obstructive pulmonary disease	Lutz SM, BMC Genet, 2015	SYN3
35	34079989	22	rs5999058	T	C	0.594974	-0.00789374	0.00195037	7.4e-05	0.590922	-0.00789854	0.00271503	0.0039	0.599059	-0.00707853	0.00281455	0.011					age at onset, alcohol dependence; chemokine (C-C motif) ligand 27 measurement; nose morphology measurement	Kapoor M, Drug Alcohol Depend, 2014; Ahola-Olli AV, Am J Hum Genet, 2016; Lee MK, PLoS One, 2017	LARGE; SNORA76
36	35696508	22	rs115531707	C	T	0.987544	-0.0149022	0.00905671	0.11	0.988077	-0.0521693	0.0127431	5.1e-05	0.987007	0.0189737	0.0129368	0.13	0.988077	-0.0521693	0.0127431	7.25281e-05	hair colour measurement; total cholesterol measurement; multiple myeloma; multiple myeloma, monoclonal gammopathy; lobe attachment; high density lipoprotein cholesterol measurement	Kichaev G, Am J Hum Genet, 2018; Willer CJ, Nat Genet, 2013; Swaminathan B, Nat Commun, 2015; Shaffer JR, Am J Hum Genet, 2017; Andaleon A, PeerJ, 2018; Mitchell JS, Nat Commun, 2016; Spracklen CN, Hum Mol Genet, 2017	HMGXB4; RP3-510H16.3; TOM1
37	36633837	22	rs188612895	C	T	0.956166	-0.00489116	0.00477429	0.29	0.956813	0.0146014	0.00664501	0.029	0.955514	-0.0242642	0.00688991	0.00047	0.956813	0.0146014	0.00664501	3.9209e-05	diabetic nephropathy; chronic kidney disease; blood protein measurement	Iyengar SK, PLoS Genet, 2015; Bostrom MA, Hum Genet, 2010; Sun BB, Nature, 2018	APOL2; APOL1
38	39260186	22	rs146798052	C	T	0.968429	-0.0210231	0.00562721	0.00017	0.967708	-0.0305711	0.00769221	6.7e-05	0.969155	-0.0115139	0.00826875	0.15	0.967708	-0.0305711	0.00769221	0.0874595	wellbeing measurement; age at menarche; blood protein measurement	Okbay A, Nat Genet, 2016; Perry JR, Nature, 2014; Emilsson V, Science, 2018	NPTXR; CBX6
39	44626402	22	rs112848088	T	C	0.969097	0.0218337	0.00541358	7.6e-05	0.969228	0.0225882	0.00743148	0.0025	0.968965	0.020935	0.00792008	0.013	0.969228	0.0225882	0.00743148	0.877484	hip bone mineral density	Chesi A, J Bone Miner Res, 2017	PARVG; KIAA1644
40	44805388	22	rs149478881	G	A	0.975108	0.0205515	0.00615416	0.00079	0.973978	0.00722244	0.00824843	0.35	0.976247	0.0393231	0.00923837	2.4e-05	0.973978	0.00722244	0.00824843	0.00866925	C-X-C motif chemokine 10 measurement; intelligence	Ahola-Olli AV, Am J Hum Genet, 2016; Davies G, Nat Commun, 2018	RP1-32I10.11
41	45901940	22	rs136716	T	C	0.295218	0.00835183	0.0021187	9.3e-05	0.294196	0.00881622	0.00290571	0.0024	0.296248	0.00824159	0.00310266	0.0086	0.294196	0.00881622	0.00290571	0.891107	adolescent idiopathic scoliosis	Liu J, Hum Genet, 2018	FBLN1
42	46783341	22	rs9627435	A	G	0.882471	0.00871021	0.00289261	0.0029	0.886342	0.000340802	0.00404666	0.9	0.878568	0.0167662	0.00415515	8.9e-05					heel bone mineral density; susceptibility to scarlet fever measurement; caudate nucleus measurement, functional brain measurement, response to reward	Morris JA, Nat Genet, 2018; Tian C, Nat Commun, 2017; Qian DC, BMC Genomics, 2017	CELSR1
43	46783370	22	rs9627436	C	T	0.882471	0.00871021	0.00289261	0.0029	0.886342	0.000340802	0.00404666	0.9	0.878568	0.0167662	0.00415515	8.9e-05					heel bone mineral density; susceptibility to scarlet fever measurement; caudate nucleus measurement, functional brain measurement, response to reward	Morris JA, Nat Genet, 2018; Tian C, Nat Commun, 2017; Qian DC, BMC Genomics, 2017	CELSR1
44	46783388	22	rs9627437	G	A	0.88237	0.00862746	0.00289192	0.0032	0.886204	0.000226547	0.00404683	0.93	0.878504	0.0166917	0.00415303	9.5e-05					heel bone mineral density; susceptibility to scarlet fever measurement; caudate nucleus measurement, functional brain measurement, response to reward	Morris JA, Nat Genet, 2018; Tian C, Nat Commun, 2017; Qian DC, BMC Genomics, 2017	CELSR1
45	47515485	22	rs5767511	T	C	0.116896	-0.0130254	0.00297359	1.3e-05	0.121392	-0.00889482	0.00402306	0.027	0.112363	-0.0189084	0.00441924	2.4e-05					longevity	Yashin AI, Aging (Albany NY), 2010	TBC1D22A
46	49555014	22	rs9616468	C	G	0.860096	-0.00507718	0.00274516	0.068	0.859179	0.00407909	0.00379638	0.28	0.861021	-0.0157067	0.0039865	9.6e-05					schizophrenia; alpha-linolenic acid measurement	Ikeda M, Schizophr Bull, 2018; Dorajoo R, Genes Nutr, 2015	-
47	49827854	22	rs73440195	C	T	0.812874	0.00989304	0.00245179	4.2e-05	0.812207	0.00819625	0.00339651	0.014	0.813546	0.0121784	0.00355441	0.00078					serum dimethylarginine measurement; response to vaccine, cytokine measurement	Seppala I, Eur Heart J, 2013; Kennedy RB, Hum Genet, 2012	C22orf34
48	49967906	22	rs112251889	G	A	0.961126	-0.00386613	0.0049537	0.44	0.96174	0.0168914	0.00690007	0.014	0.960506	-0.02397	0.00714347	0.00066	0.96174	0.0168914	0.00690007	3.08992e-05	-	-	C22orf34; RP1-29C18.10; RP1-29C18.9
49	50058346	22	rs7286706	G	C	0.787259	-0.00902246	0.00230063	9.8e-05	0.778646	-0.0103837	0.00309807	0.00086	0.795943	-0.00701849	0.00343844	0.054					red blood cell distribution width	Kichaev G, Am J Hum Genet, 2018	C22orf34
1	264136	12	12:264136	T	C	0.438941	0.00445543	0.00185985	0.017	0.437043	-0.00143794	0.00256181	0.57	0.440855	0.0105628	0.00271493	7.2e-05	0.437043	-0.00143794	0.00256181	0.00113013	-	-	IQSEC3; RP11-598F7.4; RP11-598F7.5; RP11-598F7.6
2	4509505	12	rs6650208	C	A	0.457528	-0.00787413	0.00189726	3.4e-05	0.45429	-0.00715935	0.00262497	0.006	0.460792	-0.00819297	0.00275742	0.0026					migraine without aura; migraine disorder; response to cytosine arabinoside; Headache; adolescent idiopathic scoliosis	Gormley P, Nat Genet, 2016; Anttila V, Nat Genet, 2013; Li L, BMC Genomics, 2014; Meng W, EBioMedicine, 2018; Pickrell JK, Nat Genet, 2016; Liu J, Hum Genet, 2018	FGF23
3	4509769	12	rs6650209	A	G	0.453952	-0.00754465	0.00187456	5.6e-05	0.450543	-0.00708382	0.00259374	0.0058	0.45739	-0.00750542	0.00272427	0.0052					migraine without aura; migraine disorder; response to cytosine arabinoside; Headache; adolescent idiopathic scoliosis	Gormley P, Nat Genet, 2016; Anttila V, Nat Genet, 2013; Li L, BMC Genomics, 2014; Meng W, EBioMedicine, 2018; Pickrell JK, Nat Genet, 2016; Liu J, Hum Genet, 2018	FGF23
4	4510964	12	rs7314067	A	G	0.447029	-0.00792247	0.00188344	2.6e-05	0.441181	-0.0079525	0.00261081	0.0021	0.452925	-0.00753783	0.00273271	0.0054					migraine without aura; migraine disorder; response to cytosine arabinoside; Headache; phosphorus measurement; adolescent idiopathic scoliosis	Gormley P, Nat Genet, 2016; Anttila V, Nat Genet, 2013; Li L, BMC Genomics, 2014; Meng W, EBioMedicine, 2018; Kanai M, Nat Genet, 2018; Pickrell JK, Nat Genet, 2016; Liu J, Hum Genet, 2018	FGF23
5	4728442	12	rs11063262	C	T	0.967767	0.0140433	0.00534624	0.0087	0.971619	0.0303084	0.00771958	9.3e-05	0.963883	0.00135208	0.00747858	0.8	0.971619	0.0303084	0.00771958	0.00636244	-	-	DYRK4; RP11-234B24.5; RP11-500M8.7; AKAP3; RP11-500M8.6
6	5547955	12	rs115121994	G	A	0.983848	-0.00285838	0.00735133	0.62	0.982841	0.0245161	0.00984869	0.015	0.984864	-0.0360389	0.0110559	0.0009	0.982841	0.0245161	0.00984869	3.44777e-05	blood protein measurement	Emilsson V, Science, 2018	NTF3
7	6648447	12	12:6648447	G	A	0.977822	0.0175489	0.00638156	0.005	0.977757	0.0395701	0.00877127	5.9e-06	0.977887	-0.00397133	0.00933562	0.72	0.977757	0.0395701	0.00877127	0.000576515	-	-	NCAPD2; RP5-940J5.3; GAPDH; RP5-940J5.9; IFFO1; RP5-940J5.8; NOP2
8	6694990	12	rs148460516	G	A	0.981746	0.0200339	0.00709118	0.0042	0.981983	0.0389534	0.0099198	8.1e-05	0.981506	0.00328588	0.0101956	0.75	0.981983	0.0389534	0.0099198	0.0111046	red blood cell distribution width; erythrocyte count; heel bone mineral density; pathological myopia	Kichaev G, Am J Hum Genet, 2018; Meng W, Invest Ophthalmol Vis Sci, 2012	NOP2; CHD4; RP5-940J5.6; SCARNA11
9	6709945	12	rs12816349	G	A	0.959558	-0.0107716	0.0049421	0.026	0.961797	0.0100891	0.00704472	0.15	0.957301	-0.0284722	0.00698606	5.7e-05	0.961797	0.0100891	0.00704472	8.27302e-05	heel bone mineral density; red blood cell distribution width; erythrocyte count	Morris JA, Nat Genet, 2018; Kichaev G, Am J Hum Genet, 2018	CHD4; RP5-940J5.6; SCARNA11; LPAR5
10	8117776	12	rs189277084	C	T	0.853471	-0.00103921	0.00301552	0.73	0.851003	-0.0121978	0.00411666	0.0028	0.855959	0.0111169	0.00444309	0.011	0.851003	-0.0121978	0.00411666	9.69077e-05	mean platelet volume	Astle WJ, Cell, 2016	Y_RNA
11	8126208	12	rs7975864	T	C	0.233706	0.00758872	0.00243615	0.0017	0.235238	0.0142003	0.00330878	1.6e-05	0.232161	0.00143693	0.00360855	0.73					mean platelet volume	Astle WJ, Cell, 2016	Y_RNA; RP11-69M1.1
12	8126433	12	rs7311701	T	C	0.256046	0.00732949	0.00235423	0.0017	0.255684	0.0134602	0.00320465	2.5e-05	0.256411	0.00187132	0.00347884	0.63					mean platelet volume	Astle WJ, Cell, 2016	Y_RNA; RP11-69M1.1
13	8126500	12	rs7308015	A	G	0.234162	0.00760879	0.0024371	0.0017	0.235428	0.0145194	0.00330961	1e-05	0.232886	0.00117037	0.00361047	0.79					mean platelet volume	Astle WJ, Cell, 2016	Y_RNA; RP11-69M1.1
14	8130391	12	rs11608912	G	C	0.230178	0.00786456	0.00242952	0.0011	0.22852	0.0147141	0.00331941	1.1e-05	0.231849	0.00169267	0.00357628	0.64	0.22852	0.0147141	0.00331941	0.0068786	mean platelet volume	Astle WJ, Cell, 2016	Y_RNA; RP11-69M1.1
15	8131120	12	rs6488808	C	G	0.214799	0.00746109	0.00244629	0.0022	0.214282	0.0142808	0.00333719	2.2e-05	0.215321	0.00112262	0.00360663	0.76					mean platelet volume	Astle WJ, Cell, 2016	Y_RNA; RP11-69M1.1
16	8131270	12	rs7300337	C	T	0.22931	0.00750908	0.0023987	0.0017	0.227839	0.0137548	0.00327591	3.1e-05	0.230794	0.00184097	0.00353243	0.61					mean platelet volume	Astle WJ, Cell, 2016	Y_RNA; RP11-69M1.1
17	8134488	12	rs1978277	C	T	0.211724	0.00715628	0.00243972	0.0032	0.211557	0.0140408	0.00332559	2.8e-05	0.211893	0.000712495	0.00359993	0.85	0.211557	0.0140408	0.00332559	0.00588393	mean platelet volume	Astle WJ, Cell, 2016	Y_RNA; RP11-69M1.1
18	8134494	12	rs1978276	G	A	0.211762	0.00720069	0.00243944	0.003	0.211633	0.0141206	0.00332486	2.5e-05	0.211893	0.000712495	0.00359993	0.85	0.211633	0.0141206	0.00332486	0.0055893	mean platelet volume	Astle WJ, Cell, 2016	Y_RNA; RP11-69M1.1
19	8136492	12	rs115989121	G	A	0.95895	-0.0127258	0.00505252	0.011	0.957002	-0.0268295	0.00681426	7.1e-05	0.960913	0.00449783	0.00754295	0.61	0.957002	-0.0268295	0.00681426	0.00180238	mean platelet volume; blood protein measurement	Astle WJ, Cell, 2016; Sun BB, Nature, 2018	Y_RNA; RP11-69M1.1
20	12841735	12	rs7964189	C	T	0.970288	-0.0189197	0.00551989	0.00069	0.968925	-0.0291157	0.00736594	8.9e-05	0.971661	-0.00506883	0.00833909	0.62					mean corpuscular hemoglobin; erythrocyte count; systemic lupus erythematosus; mathematical ability; pulse pressure measurement	Kichaev G, Am J Hum Genet, 2018; Yang W, Am J Hum Genet, 2012; Lee JJ, Nat Genet, 2018; Warren HR, Nat Genet, 2017	GPR19; RP11-180M15.3
21	12850368	12	rs10492237	T	C	0.975285	-0.0224618	0.00611554	0.00028	0.973808	-0.0362502	0.0081093	8.6e-06	0.976774	-0.00397853	0.00930818	0.8	0.973808	-0.0362502	0.0081093	0.00811639	mean corpuscular hemoglobin; erythrocyte count; prostate carcinoma; systemic lupus erythematosus; mean arterial pressure	Kichaev G, Am J Hum Genet, 2018; Schumacher FR, Nat Genet, 2018; Yang W, Am J Hum Genet, 2012; Kanai M, Nat Genet, 2018	GPR19; RP11-180M15.3; CDKN1B
22	12868701	12	rs35756741	C	T	0.970383	-0.0185695	0.00575231	0.0014	0.968944	-0.0302844	0.00766445	8.8e-05	0.971833	-0.00278193	0.00870573	0.86					heel bone mineral density; systolic blood pressure; leukocyte count; erythrocyte count; cardiovascular disease; prostate carcinoma; birth weight; systemic lupus erythematosus; mean arterial pressure; lymphocyte count; smoking status measurement, diastolic blood pressure; smoking status measurement, systolic blood pressure	Morris JA, Nat Genet, 2018; Evangelou E, Nat Genet, 2018; Kichaev G, Am J Hum Genet, 2018; Schumacher FR, Nat Genet, 2018; Horikoshi M, Nature, 2016; Yang W, Am J Hum Genet, 2012; Kanai M, Nat Genet, 2018; Astle WJ, Cell, 2016; Sung YJ, Am J Hum Genet, 2018; Kim SK, PLoS One, 2018	GPR19; CDKN1B; RP11-180M15.4; APOLD1
23	14795856	12	rs6488704	A	C	0.132822	-0.0107869	0.00274895	9.9e-05	0.136008	-0.00884032	0.00373939	0.022	0.129611	-0.0125646	0.00406581	0.0017					-	-	RP11-695J4.2; GUCY2C; RP11-174G6.1
24	16731105	12	rs116735687	C	T	0.981885	0.00173096	0.00696709	0.81	0.982841	-0.0308773	0.00992228	0.0021	0.980921	0.0285541	0.00985476	0.0039	0.982841	-0.0308773	0.00992228	1.67684e-05	self reported educational attainment; cigarettes per day measurement; smoking cessation; Tourette syndrome; smoking status measurement; worry measurement	Lee JJ, Nat Genet, 2018; Liu M, Nat Genet, 2019; Yu D, Am J Psychiatry, 2019; Nagel M, Nat Commun, 2018	MGST1; LMO3; RP11-424M22.3
25	16963953	12	rs10846435	C	A	0.908411	0.0130359	0.00323557	7.1e-05	0.910674	0.00944847	0.00450252	0.039	0.906131	0.0168528	0.00467608	0.00035	0.910674	0.00944847	0.00450252	0.24801	-	-	RP11-239A17.1
26	19025652	12	rs79839131	T	C	0.902065	-0.00824383	0.00317959	0.0095	0.902044	-0.0173503	0.00438423	8.2e-05	0.902086	0.000572246	0.00463642	0.94					Chagas cardiomyopathy, Trypanosoma cruzi seropositivity; QRS duration, Trypanosoma cruzi seropositivity	Deng X, PLoS One, 2013	-
27	20529780	12	rs138781528	A	T	0.985055	-0.00376413	0.00785287	0.62	0.985522	0.0277555	0.0110914	0.013	0.984584	-0.0335297	0.0111902	0.0032	0.985522	0.0277555	0.0110914	8.16778e-05	QT interval; response to carboplatin; male infertility	Marroni F, Circ Cardiovasc Genet, 2009; Wheeler HE, Pharmacogenomics J, 2011; Aston KI, J Androl, 2009	RP11-284H19.1; PDE3A
28	20531077	12	rs149544526	T	C	0.986433	-0.00148329	0.00825562	0.83	0.986746	0.0324906	0.0116105	0.0059	0.986117	-0.0342144	0.0118105	0.0048	0.986746	0.0324906	0.0116105	4.52107e-05	QT interval; response to carboplatin; male infertility	Marroni F, Circ Cardiovasc Genet, 2009; Wheeler HE, Pharmacogenomics J, 2011; Aston KI, J Androl, 2009	RP11-284H19.1; PDE3A
29	20534160	12	rs145817414	T	A	0.986113	0.000177217	0.00810796	1	0.986229	0.0323301	0.0113457	0.005	0.985996	-0.0322542	0.011654	0.0071	0.986229	0.0323301	0.0113457	5.78206e-05	QT interval; response to carboplatin; male infertility	Marroni F, Circ Cardiovasc Genet, 2009; Wheeler HE, Pharmacogenomics J, 2011; Aston KI, J Androl, 2009	RP11-284H19.1; PDE3A
170	123884305	10	rs10788247	C	T	0.882674	0.000965943	0.00290925	0.79	0.879447	-0.0126666	0.00393822	0.0012	0.885926	0.014075	0.00431978	0.00069	0.879447	-0.0126666	0.00393822	3.60568e-06	schizophrenia; hepcidin:ferritin ratio	Goes FS, Am J Med Genet B Neuropsychiatr Genet, 2015; Galesloot TE, PLoS One, 2016	TACC2
31	20542194	12	rs145443550	C	A	0.985967	0.000165506	0.00807292	1	0.985838	0.0306386	0.0112047	0.0069	0.986098	-0.0318211	0.0116955	0.0082	0.985838	0.0306386	0.0112047	9.40062e-05	lean body mass; QT interval; response to carboplatin; male infertility	Hubel C, Am J Med Genet B Neuropsychiatr Genet, 2018; Marroni F, Circ Cardiovasc Genet, 2009; Wheeler HE, Pharmacogenomics J, 2011; Aston KI, J Androl, 2009	RP11-284H19.1; PDE3A
32	22541387	12	rs187394492	C	A	0.98135	0.0173309	0.00721769	0.016	0.982438	-0.00549801	0.0102999	0.56	0.980253	0.038945	0.0101914	9e-05	0.982438	-0.00549801	0.0102999	0.00189389	smoking status measurement; coronary artery calcification	Liu M, Nat Genet, 2019; Wojczynski MK, BMC Med Genet, 2013	ST8SIA1; RP11-73M14.1
33	24396197	12	rs74068466	A	G	0.924316	-0.0114001	0.0037066	0.0023	0.9291	0.0022149	0.00520526	0.67	0.919492	-0.0237028	0.00531357	4.4e-06					response to perphenazine; AIDS; mathematical ability; Osteochondritis Dissecans; reaction time measurement	Adkins DE, Mol Psychiatry, 2010; Le Clerc S, J Infect Dis, 2009; Lee JJ, Nat Genet, 2018; Yellin JL, J Pediatr Orthop, 2015; Davies G, Nat Commun, 2018	RP11-444D3.1; RP11-778H2.1
34	28691582	12	rs140421259	G	A	0.587196	-0.00469158	0.00188564	0.012	0.591048	-0.0102945	0.00257433	6.6e-05	0.583312	0.000381964	0.00277816	0.95	0.591048	-0.0102945	0.00257433	0.00430702	forced expiratory volume; vital capacity; heel bone mineral density	Wain LV, Nat Genet, 2017; Kim SK, PLoS One, 2018	CCDC91
35	29445247	12	rs114246848	A	T	0.974864	0.00710019	0.00660995	0.27	0.973372	0.035131	0.00882598	7.6e-05	0.976367	-0.0220104	0.00997983	0.034	0.973372	0.035131	0.00882598	1.403e-05	mean platelet volume; platelet count; platelet component distribution width	Gieger C, Nature, 2011; Astle WJ, Cell, 2016; Kanai M, Nat Genet, 2018	FAR2; RP11-996F15.2
36	30348342	12	rs1351968	A	C	0.290189	0.00901082	0.00207488	1.3e-05	0.288128	0.00961814	0.00283919	0.00072	0.292267	0.0096756	0.00304942	0.0013	0.288128	0.00961814	0.00283919	0.988857	glucose homeostasis measurement, glucose effectiveness measurement; unipolar depression	Palmer ND, Diabetes, 2014; Hall LS, Transl Psychiatry, 2018	RP11-776A13.1
37	30348652	12	rs4931289	G	A	0.298033	0.00851037	0.00205792	3.2e-05	0.295944	0.00905107	0.00281945	0.0014	0.30014	0.00944141	0.00302064	0.0016					glucose homeostasis measurement, glucose effectiveness measurement; unipolar depression	Palmer ND, Diabetes, 2014; Hall LS, Transl Psychiatry, 2018	RP11-776A13.1
38	30349352	12	rs1485402	A	G	0.308031	0.00816405	0.00203764	5.3e-05	0.30721	0.00828596	0.0027783	0.0029	0.308859	0.00949779	0.00300576	0.0013	0.30721	0.00828596	0.0027783	0.764302	glucose homeostasis measurement, glucose effectiveness measurement; unipolar depression	Palmer ND, Diabetes, 2014; Hall LS, Transl Psychiatry, 2018	RP11-776A13.1
39	30350918	12	rs1485410	C	T	0.299173	0.00840318	0.00204527	3.7e-05	0.298429	0.00875099	0.00277991	0.0017	0.299924	0.00923282	0.00302711	0.0018	0.298429	0.00875099	0.00277991	0.90549	glucose homeostasis measurement, glucose effectiveness measurement; unipolar depression	Palmer ND, Diabetes, 2014; Hall LS, Transl Psychiatry, 2018	RP11-776A13.1
40	30351243	12	rs1872443	A	G	0.296184	0.00894557	0.00204904	1.2e-05	0.295654	0.0096449	0.00278758	0.0006	0.296718	0.00956241	0.00302976	0.0013	0.295654	0.0096449	0.00278758	0.983811	glucose homeostasis measurement, glucose effectiveness measurement; unipolar depression	Palmer ND, Diabetes, 2014; Hall LS, Transl Psychiatry, 2018	RP11-776A13.1
41	30351345	12	rs1996701	A	G	0.295984	0.00891308	0.00204856	1.3e-05	0.295609	0.00965687	0.00278718	0.00059	0.296362	0.00951519	0.00302874	0.0014	0.295609	0.00965687	0.00278718	0.972192	glucose homeostasis measurement, glucose effectiveness measurement; unipolar depression	Palmer ND, Diabetes, 2014; Hall LS, Transl Psychiatry, 2018	RP11-776A13.1
42	31778769	12	rs11051491	G	A	0.85584	-0.00924313	0.00266277	0.00045	0.857936	-0.00160467	0.00372493	0.65	0.853727	-0.0162166	0.00382873	1.6e-05	0.857936	-0.00160467	0.00372493	0.00559958	mathematical ability	Lee JJ, Nat Genet, 2018	DENND5B-AS1; AK4P3; METTL20
43	31778904	12	rs34229621	G	A	0.887928	-0.00976807	0.00295231	0.00082	0.893875	-0.00296238	0.00418477	0.46	0.881932	-0.016204	0.0041961	6.8e-05					mathematical ability	Lee JJ, Nat Genet, 2018	DENND5B-AS1; AK4P3; METTL20
44	31884716	12	rs566634130	T	A	0.971801	-0.0157225	0.00574386	0.0054	0.973625	0.00475262	0.00819367	0.57	0.969963	-0.033854	0.00811385	1.8e-05					-	-	AMN1; AC023157.1; RP11-467L13.4; RP11-467L13.5
45	31886766	12	rs568153283	T	C	0.971763	-0.0158159	0.00573368	0.0051	0.973637	0.0045788	0.00818927	0.58	0.969874	-0.0338077	0.00809078	1.8e-05					-	-	AMN1; AC023157.1; RP11-467L13.4; RP11-467L13.5
46	32061453	12	rs112673195	G	A	0.873983	-0.0108084	0.00284335	0.00012	0.869827	-0.00492037	0.00386289	0.19	0.878173	-0.016553	0.00421176	8.4e-05	0.869827	-0.00492037	0.00386289	0.0392676	urgency urinary incontinence; interleukin 9 measurement; facial wrinkling	Richter HE, J Urol, 2014; Ahola-Olli AV, Am J Hum Genet, 2016; Hamer MA, J Invest Dermatol, 2018	RP11-428G5.5; RP11-428G5.6; RP11-428G5.1; AC023050.1
47	32069846	12	rs58015528	C	T	0.783253	-0.0097877	0.00226885	1.4e-05	0.782362	-0.00650743	0.0031089	0.033	0.784152	-0.0133587	0.00332963	5.6e-05					urgency urinary incontinence; susceptibility to mononucleosis measurement; facial wrinkling	Richter HE, J Urol, 2014; Tian C, Nat Commun, 2017; Hamer MA, J Invest Dermatol, 2018	RP11-428G5.6; RP11-428G5.1; AC023050.1
48	32125869	12	rs10771893	T	G	0.784878	0.00900115	0.00227333	8.5e-05	0.790178	0.00708291	0.00316517	0.025	0.779534	0.0100893	0.00328446	0.0025	0.790178	0.00708291	0.00316517	0.504444	red blood cell distribution width; eosinophil count; hormone measurement; Testicular Germ Cell Tumor; left ventricular structural measurement	Kichaev G, Am J Hum Genet, 2018; Comuzzie AG, PLoS One, 2012; Litchfield K, Nat Genet, 2017; Wild PS, J Clin Invest, 2017	RP11-428G5.2; RP11-428G5.7; KIAA1551
49	40725281	12	rs116447010	A	G	0.9752	0.0273667	0.00608591	7.6e-06	0.974413	0.0222019	0.0082685	0.0083	0.975992	0.0339664	0.00901193	0.00013	0.974413	0.0222019	0.0082685	0.329983	ankylosing spondylitis, psoriasis, ulcerative colitis, Crohn's disease, sclerosing cholangitis; Crohn's disease; inflammatory bowel disease; Parkinson's disease	Ellinghaus D, Nat Genet, 2016; de Lange KM, Nat Genet, 2017; Do CB, PLoS Genet, 2011	LRRK2
50	43076029	12	rs115961646	G	A	0.966243	0.0161662	0.0056062	0.0049	0.965455	-0.00154959	0.00755857	0.82	0.967038	0.0347194	0.00837094	4.5e-05	0.965455	-0.00154959	0.00755857	0.00112745	lobe attachment	Shaffer JR, Am J Hum Genet, 2017	RP11-25I15.2; RP11-25I15.1; RP11-25I15.3
51	45970591	12	rs116313585	C	T	0.973192	-0.0180819	0.00586537	0.0019	0.973335	-0.0320867	0.00804039	6e-05	0.973048	-0.00646963	0.0086039	0.51	0.973335	-0.0320867	0.00804039	0.027589	wellbeing measurement; waist-hip ratio; schizophrenia; adolescent idiopathic scoliosis	Okbay A, Nat Genet, 2016; Kichaev G, Am J Hum Genet, 2018; Goes FS, Am J Med Genet B Neuropsychiatr Genet, 2015; Liu J, Hum Genet, 2018	RP11-352M15.1; RNU6-671P
52	48271382	12	12:48271382	G	A	0.989172	0.0425433	0.010122	2.6e-05	0.987655	0.0477831	0.0128003	0.00021					0.987655	0.0477831	0.0128003	0.603194	cardiovascular disease; eosinophil count; gut microbiome measurement; gout	Kichaev G, Am J Hum Genet, 2018; Wang J, Nat Genet, 2016; Lai HM, Rheumatology (Oxford), 2011	VDR; RP11-89H19.1
53	49044062	12	rs55823822	A	G	0.975795	0.0195463	0.00613637	0.0018	0.975145	0.00557563	0.00837988	0.55	0.97645	0.0370467	0.00903742	6.4e-05					heel bone mineral density	Kim SK, PLoS One, 2018	OR11M1P; KANSL2; SNORA34; SNORA2A; SNORA2B
54	53186122	12	rs4432093	G	A	0.197048	0.00608184	0.00235477	0.0085	0.195433	-0.000886362	0.00323859	0.79	0.198677	0.0145386	0.00344273	2.2e-05					-	-	KRT76; RP11-153F5.2; KRT3; KRT4
55	53190390	12	rs10783538	A	C	0.194958	0.00579293	0.00237064	0.013	0.192909	-0.00121512	0.00327338	0.72	0.197024	0.0139508	0.00345215	4.8e-05	0.192909	-0.00121512	0.00327338	0.00124415	-	-	KRT76; RP11-153F5.2; KRT3; KRT4; KRT79
56	59001248	12	rs55917696	G	A	0.9453	-0.01482	0.00409852	0.0003	0.944833	-0.0237004	0.00564784	2.1e-05	0.945771	-0.00617581	0.00598015	0.37					-	-	RP11-362K2.2; RP11-767I20.1
57	59014544	12	rs74097543	C	A	0.947641	-0.0141434	0.00418516	0.00069	0.946922	-0.0229359	0.005776	5.7e-05	0.948366	-0.00597665	0.00609734	0.39					-	-	RP11-362K2.2; RP11-767I20.1
58	59018429	12	rs74097552	C	T	0.947175	-0.0139776	0.00417599	0.00079	0.946562	-0.0226028	0.00577046	7.1e-05	0.947793	-0.00599614	0.00607644	0.39					-	-	RP11-362K2.2; RP11-767I20.1
59	59033852	12	rs74097562	A	G	0.945668	-0.014702	0.00410266	0.00032	0.944669	-0.0239582	0.00564018	1.7e-05	0.946674	-0.00574354	0.00600076	0.41					-	-	RP11-362K2.2; RP11-767I20.1
60	59170592	12	rs56951142	G	A	0.864517	-0.0116576	0.00274367	2.6e-05	0.863052	-0.0133799	0.00376635	0.00039	0.865995	-0.00977189	0.00401904	0.016					-	-	RP11-362K2.2; RP11-767I20.1
61	59171880	12	rs74099273	C	A	0.864948	-0.0118185	0.00274391	2e-05	0.863374	-0.0135308	0.00376526	0.00033	0.866535	-0.0099347	0.00402096	0.015					-	-	RP11-362K2.2; RP11-767I20.1
62	59172381	12	rs59956794	T	C	0.869946	-0.0120282	0.00277761	1.7e-05	0.86883	-0.0142543	0.00380818	0.00018	0.87107	-0.00965814	0.00407393	0.019					-	-	RP11-362K2.2; RP11-767I20.1
63	59172539	12	rs61509791	G	A	0.865094	-0.0116534	0.00273771	2.5e-05	0.863576	-0.0133631	0.00375417	0.00038	0.866624	-0.00970599	0.00401472	0.017					-	-	RP11-362K2.2; RP11-767I20.1
64	59173063	12	rs60917895	G	A	0.86504	-0.01158	0.00273537	2.7e-05	0.863512	-0.0132559	0.00375064	0.00042	0.86658	-0.00965764	0.00401164	0.017					-	-	RP11-362K2.2; RP11-767I20.1
65	59174614	12	rs77949029	A	G	0.865053	-0.0114841	0.00273413	3.2e-05	0.86355	-0.0131576	0.00374878	0.00046	0.866567	-0.00954387	0.00400999	0.019					-	-	RP11-362K2.2; RP11-767I20.1
66	59175171	12	rs11829117	T	C	0.865018	-0.0114562	0.0027342	3.3e-05	0.863538	-0.0131509	0.00374888	0.00046	0.86651	-0.00949956	0.00401007	0.019	0.863538	-0.0131509	0.00374888	0.500549	-	-	RP11-362K2.2; RP11-767I20.1
67	59176410	12	rs150147566	A	G	0.891484	-0.0124078	0.002977	3.2e-05	0.890891	-0.0142109	0.00407634	0.00046	0.892082	-0.0108376	0.00437206	0.015	0.890891	-0.0142109	0.00407634	0.56765	-	-	RP11-362K2.2; RP11-767I20.1
68	59177002	12	rs11836165	T	A	0.864394	-0.0114552	0.00272932	3.2e-05	0.863178	-0.0132695	0.00374638	0.00041	0.865619	-0.00947685	0.00399829	0.019	0.863178	-0.0132695	0.00374638	0.483295	-	-	RP11-362K2.2; RP11-767I20.1
69	59177662	12	rs77284064	A	G	0.864359	-0.011447	0.00272877	3.3e-05	0.86314	-0.0132614	0.00374556	0.00041	0.865588	-0.00946614	0.00399754	0.019					-	-	RP11-362K2.2; RP11-767I20.1
70	59177915	12	rs146568273	T	G	0.864403	-0.0114386	0.00272965	3.3e-05	0.863197	-0.0132455	0.00374683	0.00042	0.865619	-0.00946624	0.00399876	0.02	0.863197	-0.0132455	0.00374683	0.484892	-	-	RP11-362K2.2; RP11-767I20.1
71	59178028	12	rs140032437	A	G	0.864312	-0.0114105	0.00272973	3.5e-05	0.863109	-0.0131961	0.0037468	0.00044	0.865524	-0.00945632	0.00399902	0.02	0.863109	-0.0131961	0.0037468	0.489479	-	-	RP11-362K2.2; RP11-767I20.1
72	59178491	12	rs78843098	C	G	0.868726	-0.0119583	0.00275949	1.7e-05	0.86796	-0.0142762	0.00378876	0.00017	0.869499	-0.00961869	0.00404136	0.019					-	-	RP11-362K2.2; RP11-767I20.1
73	59179588	12	rs74664934	G	A	0.894518	-0.0122673	0.00302028	5e-05	0.89443	-0.0139358	0.00414683	0.0007	0.894607	-0.0109513	0.00442323	0.014					-	-	RP11-362K2.2; RP11-767I20.1
74	59180293	12	rs74098358	T	G	0.864644	-0.0111431	0.00271449	4.8e-05	0.863235	-0.0128341	0.00372607	0.00059	0.866065	-0.00934724	0.00397655	0.02					-	-	RP11-362K2.2; RP11-767I20.1
75	59190439	12	rs74098363	G	A	0.866199	-0.0115677	0.00273192	2.6e-05	0.865424	-0.0135455	0.00374299	0.0003	0.86698	-0.0096261	0.00400967	0.018					-	-	RP11-362K2.2; RP11-767I20.1
76	59191258	12	rs57263532	G	T	0.865575	-0.0116092	0.00272815	2.4e-05	0.865127	-0.0133547	0.00374302	0.00037	0.866026	-0.00988147	0.0039984	0.015					-	-	RP11-362K2.2; RP11-767I20.1
77	59191474	12	rs74098365	G	A	0.865119	-0.0116758	0.0027263	2.1e-05	0.864818	-0.0133437	0.00374121	0.00037	0.865422	-0.00999839	0.00399488	0.014					-	-	RP11-362K2.2; RP11-767I20.1
78	59193364	12	rs55891335	T	C	0.865575	-0.0116092	0.00272815	2.4e-05	0.865127	-0.0133547	0.00374302	0.00037	0.866026	-0.00988147	0.0039984	0.015					-	-	RP11-362K2.2; RP11-767I20.1
79	59193675	12	rs61217569	G	A	0.865562	-0.0116073	0.0027278	2.4e-05	0.865109	-0.0133494	0.0037422	0.00037	0.86602	-0.00988247	0.00399825	0.015					-	-	RP11-362K2.2; RP11-767I20.1
80	59194384	12	rs11832215	G	C	0.866056	-0.0115887	0.00273211	2.5e-05	0.865443	-0.0135353	0.00374493	0.00031	0.866675	-0.00966342	0.0040081	0.018	0.865443	-0.0135353	0.00374493	0.474701	-	-	RP11-362K2.2; RP11-767I20.1
81	59195758	12	rs74098381	G	A	0.86605	-0.0115437	0.00273276	2.7e-05	0.865493	-0.0134752	0.00374612	0.00033	0.866612	-0.00963171	0.00400871	0.018					-	-	RP11-362K2.2; RP11-767I20.1
82	59196182	12	rs59212958	T	A	0.876308	-0.0120678	0.00282729	2.1e-05	0.875763	-0.0140672	0.00387455	0.00027	0.876857	-0.0101328	0.00414865	0.016					-	-	RP11-362K2.2; RP11-767I20.1
83	59197499	12	rs115694418	T	C	0.888513	-0.0118144	0.00293575	5.9e-05	0.888153	-0.0130925	0.0040147	0.001	0.888877	-0.0106481	0.00431722	0.015	0.888153	-0.0130925	0.0040147	0.674553	late-onset Alzheimers disease	Mez J, Alzheimers Dement, 2016	RP11-362K2.2; RP11-767I20.1
84	59203252	12	rs74098387	C	G	0.873917	-0.013052	0.00279493	3.4e-06	0.872754	-0.015279	0.00382859	6.2e-05	0.875089	-0.0109661	0.00410304	0.0094					late-onset Alzheimers disease	Mez J, Alzheimers Dement, 2016	RP11-362K2.2
85	59203557	12	rs74098388	C	G	0.874018	-0.0130838	0.00279341	3.2e-06	0.872861	-0.0153059	0.00382882	6e-05	0.875184	-0.0110351	0.00409822	0.0089					late-onset Alzheimers disease	Mez J, Alzheimers Dement, 2016	RP11-362K2.2
86	59204313	12	rs60233759	G	A	0.874101	-0.0130835	0.00279536	3.2e-06	0.87288	-0.0152916	0.00382868	6.1e-05	0.875331	-0.0110037	0.00410421	0.0092					late-onset Alzheimers disease	Mez J, Alzheimers Dement, 2016	RP11-362K2.2
87	59204911	12	rs74098390	T	A	0.874661	-0.0134068	0.00280307	1.9e-06	0.873114	-0.0159099	0.00383617	3.1e-05	0.876221	-0.0110185	0.004119	0.0095					late-onset Alzheimers disease	Mez J, Alzheimers Dement, 2016	RP11-362K2.2
88	59206213	12	rs77060180	C	T	0.885039	-0.011939	0.00288715	3.8e-05	0.885062	-0.0140502	0.00395882	0.00036	0.885017	-0.00991011	0.00423399	0.022					late-onset Alzheimers disease	Mez J, Alzheimers Dement, 2016	RP11-362K2.2
89	59217598	12	12:59217598	G	C	0.941323	0.0190674	0.00476617	6.7e-05	0.939635	0.0210248	0.00643787	0.00087	0.943023	0.018823	0.00710299	0.015	0.939635	0.0210248	0.00643787	0.816072	late-onset Alzheimers disease	Mez J, Alzheimers Dement, 2016	RP11-362K2.2
90	59260195	12	rs77118648	A	T	0.888627	-0.0133633	0.00296925	6.4e-06	0.889257	-0.0173482	0.00409249	1.8e-05	0.887993	-0.0108586	0.00433158	0.016					heart failure; blood protein measurement	Smith NL, Circ Cardiovasc Genet, 2010; Sun BB, Nature, 2018	LRIG3
91	59271083	12	12:59271083	G	A	0.894508	-0.0138526	0.00305137	5.5e-06	0.895307	-0.0169402	0.00420509	4.4e-05	0.893704	-0.0124282	0.00445201	0.0067	0.895307	-0.0169402	0.00420509	0.455564	osteoarthritis, hip; heart failure; blood protein measurement	Tachmazidou I, Nat Genet, 2019; Smith NL, Circ Cardiovasc Genet, 2010; Sun BB, Nature, 2018	LRIG3
92	61097239	12	rs56783771	T	A	0.889989	-0.0043434	0.00293909	0.14	0.890134	-0.0154772	0.0040316	9.4e-05	0.889844	0.00621613	0.00430846	0.12					-	-	-
93	61103357	12	rs74094030	C	T	0.889242	-0.00469238	0.00292541	0.11	0.889509	-0.0165523	0.00401604	2.8e-05	0.888972	0.00656904	0.0042849	0.1					-	-	-
94	61105299	12	rs74094033	C	A	0.893885	-0.0050697	0.00297482	0.086	0.89284	-0.0164413	0.00406035	3.7e-05	0.894938	0.00542443	0.00438351	0.16					-	-	-
95	61112824	12	rs74094050	A	G	0.906356	-0.00547082	0.00313948	0.084	0.905993	-0.0172181	0.00427109	4.8e-05	0.906722	0.00573707	0.00464206	0.17					-	-	-
96	61113753	12	rs74094051	T	C	0.890654	-0.00483454	0.00293841	0.098	0.890664	-0.016295	0.00402651	3.9e-05	0.890645	0.00596059	0.00431203	0.13					-	-	-
97	61114838	12	rs74094052	C	T	0.906343	-0.0054821	0.00313934	0.083	0.905968	-0.0172377	0.00427072	4.7e-05	0.906722	0.00573707	0.00464206	0.17					-	-	-
98	61123962	12	rs55662189	G	A	0.904991	-0.00592359	0.00312465	0.059	0.904466	-0.0175114	0.00424971	3.2e-05	0.90552	0.00513941	0.00462152	0.21					-	-	-
99	61127532	12	rs151129776	G	A	0.888811	-0.00439402	0.00291909	0.13	0.888834	-0.0158807	0.00399971	5.4e-05	0.888788	0.00654711	0.00428403	0.1	0.888834	-0.0158807	0.00399971	0.000106438	-	-	-
100	61127723	12	rs77443739	G	C	0.906166	-0.00553057	0.00313687	0.08	0.905665	-0.0172435	0.00426484	4.5e-05	0.906671	0.00565212	0.00464134	0.17					-	-	-
101	61138405	12	rs74094062	T	A	0.906407	-0.00581105	0.0031407	0.066	0.90586	-0.0173783	0.00427271	4.1e-05	0.906958	0.0051759	0.00464393	0.21					-	-	-
102	61140153	12	rs74933037	A	G	0.906302	-0.00562947	0.00313932	0.075	0.905804	-0.0173263	0.00426995	4.3e-05	0.906805	0.00553504	0.0046429	0.18					-	-	-
103	61140352	12	rs80342289	A	T	0.888767	-0.00448507	0.00291881	0.12	0.888683	-0.0159431	0.0039994	5e-05	0.888851	0.00647448	0.00428355	0.11					-	-	-
104	61144468	12	rs60509692	C	A	0.889049	-0.00444743	0.0029202	0.12	0.889131	-0.0160709	0.00400211	4.5e-05	0.888966	0.00668813	0.0042847	0.095					-	-	-
105	61145534	12	rs74094069	A	G	0.888713	-0.00447221	0.00291711	0.12	0.888594	-0.0158976	0.00399554	5.2e-05	0.888832	0.00648103	0.00428274	0.1					-	-	-
106	61148447	12	rs74094070	G	C	0.906229	-0.00555884	0.0031368	0.079	0.905709	-0.017243	0.00426485	4.5e-05	0.906754	0.00562869	0.0046411	0.17					-	-	-
107	61153104	12	rs74094071	C	T	0.890433	-0.00484751	0.00293509	0.096	0.890127	-0.0163103	0.00401738	3.7e-05	0.89074	0.00603292	0.00431225	0.13					-	-	-
108	61155217	12	rs79518214	T	C	0.906014	-0.00592239	0.00313565	0.061	0.90569	-0.0172311	0.00426407	4.6e-05	0.906341	0.00484018	0.00463848	0.23					-	-	-
109	61155490	12	rs142338853	G	C	0.890391	-0.00512603	0.00293486	0.079	0.890127	-0.0163103	0.00401738	3.7e-05	0.890658	0.00545935	0.00431154	0.17	0.890127	-0.0163103	0.00401738	0.000183174	-	-	-
110	61160530	12	12:61160530	T	C	0.906109	-0.00592517	0.00313584	0.061	0.905627	-0.0172724	0.00426442	4.4e-05	0.906595	0.00490463	0.00463867	0.23	0.905627	-0.0172724	0.00426442	0.000364678	-	-	-
111	61160828	12	rs57616146	A	G	0.906182	-0.0058821	0.00313644	0.063	0.905709	-0.017243	0.00426485	4.5e-05	0.906659	0.00495443	0.00464	0.22					-	-	-
112	61178011	12	rs74094085	T	C	0.8955	-0.00551896	0.00299327	0.063	0.894177	-0.0168663	0.00408665	2.6e-05	0.896833	0.00478659	0.00440948	0.21					-	-	-
113	61178304	12	rs74094087	A	G	0.902521	-0.00548374	0.00308892	0.08	0.902347	-0.0170718	0.00421509	4.4e-05	0.902697	0.00589212	0.00455267	0.16					-	-	-
114	61178983	12	rs61265614	G	C	0.895436	-0.00540624	0.00299107	0.068	0.894095	-0.0168583	0.00408325	2.6e-05	0.896788	0.00499157	0.0044067	0.19					-	-	-
115	61180097	12	12:61180097	G	T	0.89543	-0.00540638	0.00299111	0.068	0.894095	-0.0168583	0.00408325	2.6e-05	0.896776	0.00499086	0.00440681	0.19	0.894095	-0.0168583	0.00408325	0.000230361	-	-	-
116	61182791	12	rs76688568	A	C	0.906451	-0.00543411	0.00313981	0.086	0.905879	-0.0173016	0.00427113	4.4e-05	0.907027	0.00586724	0.00464303	0.16					-	-	-
117	61186163	12	rs140061494	C	T	0.891677	-0.00540255	0.00295508	0.066	0.891206	-0.0166981	0.00404805	2.7e-05	0.892152	0.00467759	0.00433793	0.22	0.891206	-0.0166981	0.00404805	0.000263714	-	-	-
118	61186794	12	rs145340416	A	T	0.895326	-0.00517439	0.00299011	0.081	0.894007	-0.0166221	0.00408194	3.3e-05	0.896655	0.00523044	0.0044053	0.18	0.894007	-0.0166221	0.00408194	0.000228743	-	-	-
119	61187969	12	rs111380466	G	A	0.885109	-0.00486045	0.0028894	0.089	0.887528	-0.0159216	0.00399257	5.2e-05	0.88267	0.00520524	0.0042048	0.19	0.887528	-0.0159216	0.00399257	0.00022419	-	-	-
120	61190463	12	rs74094207	A	C	0.895354	-0.00517435	0.00298997	0.081	0.89402	-0.0166341	0.00408184	3.3e-05	0.896699	0.00524145	0.00440497	0.17					-	-	-
121	61192148	12	rs74094237	G	T	0.906527	-0.00550004	0.00314161	0.082	0.90586	-0.0173438	0.00427212	4.2e-05	0.907199	0.00580223	0.00464741	0.16					-	-	-
122	61194088	12	rs149744513	G	A	0.895557	-0.00537317	0.00299178	0.07	0.894152	-0.0168479	0.00408328	2.6e-05	0.896973	0.00505036	0.00440881	0.19	0.894152	-0.0168479	0.00408328	0.000223795	-	-	-
123	61194485	12	rs74094240	C	T	0.895557	-0.00537317	0.00299178	0.07	0.894152	-0.0168479	0.00408328	2.6e-05	0.896973	0.00505036	0.00440881	0.19					-	-	-
124	61194841	12	rs74094242	G	A	0.89525	-0.00534132	0.0029926	0.072	0.893843	-0.0167983	0.0040841	2.8e-05	0.896668	0.00506825	0.00441038	0.19					-	-	-
125	61195330	12	rs56174739	G	T	0.906533	-0.00550732	0.00314179	0.082	0.90586	-0.0173438	0.00427212	4.2e-05	0.907212	0.00579174	0.00464795	0.16					-	-	-
126	61200251	12	rs59327826	A	T	0.906476	-0.00561658	0.00314264	0.076	0.905715	-0.017301	0.00427244	4.4e-05	0.907244	0.00557326	0.00465019	0.18					-	-	-
127	61213184	12	rs74094281	G	C	0.906502	-0.0054113	0.00314245	0.088	0.905886	-0.0172394	0.00427311	4.7e-05	0.907123	0.00592083	0.00464881	0.16					-	-	-
128	61258149	12	rs74096219	C	T	0.907018	-0.00557831	0.00315854	0.08	0.906397	-0.0170156	0.00430094	6.6e-05	0.907644	0.00534653	0.00466576	0.19					-	-	-
129	61261177	12	rs74096221	A	G	0.907097	-0.00568186	0.00315955	0.075	0.906397	-0.0170156	0.00430094	6.6e-05	0.907803	0.00514142	0.00466884	0.21					-	-	-
130	61280958	12	rs58022428	C	T	0.908953	-0.00600461	0.00321173	0.065	0.907999	-0.0169732	0.00435761	8.7e-05	0.909915	0.00445777	0.0047627	0.27					-	-	-
131	62404705	12	rs373960195	T	G	0.866076	-0.0082721	0.00298782	0.006	0.866408	-0.0163399	0.00411207	7.1e-05	0.86574	-0.000294053	0.00436508	1					response to bronchodilator, FEV/FEC ratio; chronic obstructive pulmonary disease; macrophage migration inhibitory factor measurement	Lutz SM, BMC Genet, 2015; Cho MH, Lancet Respir Med, 2014; Ahola-Olli AV, Am J Hum Genet, 2016	FAM19A2; RPS3P6
132	63506845	12	rs74097619	C	T	0.929982	-0.0152774	0.00376628	6.8e-05	0.930747	-0.013846	0.00520822	0.0078	0.92921	-0.0135235	0.00547621	0.013					chronotype measurement; circadian rhythm	Kichaev G, Am J Hum Genet, 2018; Jones SE, Nat Commun, 2019; Hu Y, Nat Commun, 2016	-
133	63511001	12	rs74714190	A	G	0.956432	-0.0188026	0.0046525	7.1e-05	0.957002	-0.0195075	0.00644303	0.0024	0.955857	-0.0162424	0.00675506	0.019					chronotype measurement; circadian rhythm	Kichaev G, Am J Hum Genet, 2018; Jones SE, Nat Commun, 2019; Hu Y, Nat Commun, 2016	-
134	63520113	12	rs74097634	A	T	0.957499	-0.01962	0.00473348	4.6e-05	0.958018	-0.0187382	0.00655032	0.0042	0.956977	-0.0190367	0.00687766	0.007					chronotype measurement; circadian rhythm	Kichaev G, Am J Hum Genet, 2018; Jones SE, Nat Commun, 2019; Hu Y, Nat Commun, 2016	AVPR1A
135	63520935	12	rs78631311	C	G	0.956188	-0.0188996	0.00462359	5.8e-05	0.957009	-0.0194396	0.00642188	0.0024	0.955361	-0.0168057	0.00669379	0.015					chronotype measurement; circadian rhythm	Kichaev G, Am J Hum Genet, 2018; Jones SE, Nat Commun, 2019; Hu Y, Nat Commun, 2016	AVPR1A
136	63524453	12	rs7304848	A	G	0.945047	-0.0195843	0.00418061	3.7e-06	0.946657	-0.0211174	0.00583103	0.00028	0.943424	-0.0165567	0.00602833	0.0069					chronotype measurement; circadian rhythm	Kichaev G, Am J Hum Genet, 2018; Jones SE, Nat Commun, 2019; Hu Y, Nat Commun, 2016	AVPR1A
137	63533327	12	rs74097646	G	C	0.922283	-0.0154562	0.00351048	1.4e-05	0.923492	-0.0167744	0.00487846	0.0006	0.921063	-0.0133111	0.00507966	0.0098					chronotype measurement	Kichaev G, Am J Hum Genet, 2018; Jones SE, Nat Commun, 2019	AVPR1A
138	63536142	12	rs74097647	A	G	0.893517	-0.0119886	0.00305195	9.8e-05	0.896316	-0.0128068	0.00423102	0.0025	0.890696	-0.00998321	0.0044272	0.021					chronotype measurement	Kichaev G, Am J Hum Genet, 2018; Jones SE, Nat Commun, 2019	AVPR1A
139	63536349	12	rs74097649	T	C	0.922599	-0.0155279	0.00350168	1.2e-05	0.923795	-0.0168315	0.00486796	0.00056	0.921394	-0.0134057	0.00506518	0.0091					chronotype measurement	Kichaev G, Am J Hum Genet, 2018; Jones SE, Nat Commun, 2019	AVPR1A
140	63536565	12	rs74097651	A	G	0.893577	-0.0119975	0.0030505	9.6e-05	0.896297	-0.0128916	0.00422961	0.0023	0.890836	-0.00992808	0.00442444	0.022					chronotype measurement	Kichaev G, Am J Hum Genet, 2018; Jones SE, Nat Commun, 2019	AVPR1A
141	64162624	12	rs6581508	T	G	0.598809	-0.00765344	0.00191007	8.2e-05	0.600555	-0.003865	0.00262798	0.15	0.597049	-0.0115144	0.00279147	2.4e-05					-	-	RP11-415I12.3; RP11-415I12.1; TMEM5
142	65011409	12	rs116609920	C	T	0.980691	-0.00108994	0.0069278	0.87	0.980066	0.0251683	0.00942557	0.0077	0.981322	-0.0291614	0.0102431	0.0042	0.980066	0.0251683	0.00942557	7.72677e-05	prostate carcinoma; mean platelet volume; platelet count; executive function measurement	Schumacher FR, Nat Genet, 2018; Astle WJ, Cell, 2016; Iotchkova V, Nat Genet, 2016; Zhang H, Am J Med Genet B Neuropsychiatr Genet, 2018	RP11-338E21.1; RASSF3; MIR548C; RP11-338E21.2
143	65267602	12	rs11838110	T	A	0.955175	0.0185199	0.00456082	5.2e-05	0.955621	0.0191223	0.00625965	0.0024	0.954725	0.0174647	0.00668199	0.0093	0.955621	0.0191223	0.00625965	0.854525	neuropsychological test	Cirulli ET, Eur J Hum Genet, 2010	TBC1D30; RP11-766N7.1; RP11-766N7.3
144	66853267	12	rs10219742	C	T	0.768289	0.00677445	0.0022368	0.0024	0.764446	0.0123532	0.00305008	5.9e-05	0.772164	0.000689312	0.00329984	0.84	0.764446	0.0123532	0.00305008	0.00856982	-	-	GRIP1
145	66857938	12	12:66857938	C	T	0.768457	0.00667714	0.00223567	0.0028	0.764926	0.0122087	0.00304808	7.1e-05	0.772017	0.000631512	0.0032986	0.86	0.764926	0.0122087	0.00304808	0.00904017	-	-	GRIP1
146	66858796	12	rs12818702	C	G	0.545554	0.007404	0.00187614	9e-05	0.554365	0.00935301	0.00257854	0.00033	0.53667	0.00618153	0.00274652	0.036	0.554365	0.00935301	0.00257854	0.393889	-	-	GRIP1
147	66858835	12	rs12818551	A	G	0.544695	0.00737229	0.00187641	9.7e-05	0.553318	0.00950717	0.00258019	0.00026	0.536002	0.00600882	0.00274549	0.042	0.553318	0.00950717	0.00258019	0.347031	-	-	GRIP1
148	66861112	12	rs7132670	T	C	0.544968	0.00740278	0.00187561	9.1e-05	0.55388	0.00948567	0.00257553	0.00027	0.535983	0.00601877	0.00274829	0.042					-	-	GRIP1
149	66863126	12	rs10506483	A	G	0.522644	0.00780019	0.00187671	3.6e-05	0.532097	0.0100945	0.00257948	0.00011	0.513114	0.00620111	0.00274746	0.035	0.532097	0.0100945	0.00257948	0.295428	-	-	GRIP1
150	67083103	12	rs75524584	A	G	0.907525	0.010825	0.00335623	0.0013	0.9054	0.0033416	0.00462001	0.49	0.909667	0.0188913	0.00490291	9.5e-05					response to bronchodilator, FEV/FEC ratio	Lutz SM, BMC Genet, 2015	GRIP1
151	68793684	12	rs11177204	A	G	0.934324	-0.0159199	0.00407139	8.6e-05	0.932135	-0.0167439	0.00557264	0.0028	0.93653	-0.0167569	0.00598286	0.0076	0.932135	-0.0167439	0.00557264	0.998715	behavior or behavioral disorder measurement, personality trait, bipolar disorder	Greenwood TA, Biol Psychiatry, 2012	RP11-81H14.2
152	68966394	12	rs2468407	T	C	0.942843	0.00405475	0.00398182	0.31	0.940336	-0.0111221	0.00538516	0.036	0.94537	0.0218333	0.00592647	0.00019	0.940336	-0.0111221	0.00538516	3.07551e-05	leukocyte count; bipolar disorder, body mass index	Kamatani Y, Nat Genet, 2010; Winham SJ, Mol Psychiatry, 2013	RP11-254B13.1
153	69212831	12	rs1625525	T	C	0.816316	-0.00627197	0.00238885	0.0076	0.823114	-0.0132597	0.00335528	7.5e-05	0.809463	-0.00116038	0.00342358	0.82	0.823114	-0.0132597	0.00335528	0.0105797	mean corpuscular hemoglobin; erythrocyte count	Kichaev G, Am J Hum Genet, 2018	AC124890.1; RP11-611O2.2; MDM2; RP11-611O2.1; RP11-611O2.5; RP11-611O2.3; CPM
154	70488997	12	rs74400772	C	A	0.951609	0.0170484	0.00431905	8.9e-05	0.953444	0.01396	0.00604992	0.022	0.949758	0.0194289	0.00620289	0.0016					-	-	RP11-611E13.2
155	70490108	12	rs75441992	T	C	0.951596	0.0170422	0.00431909	9e-05	0.953425	0.0139499	0.00604996	0.022	0.949752	0.0194238	0.00620296	0.0016					-	-	RP11-611E13.2
156	70491987	12	rs77551559	C	T	0.951653	0.017068	0.00432431	8.9e-05	0.953501	0.0139965	0.00605975	0.021	0.94979	0.0194239	0.00620807	0.0016					-	-	RP11-611E13.2
157	70499715	12	rs77684790	C	T	0.951602	0.0170441	0.0043191	9e-05	0.953438	0.0139569	0.00604997	0.022	0.949752	0.0194238	0.00620296	0.0016					-	-	RP11-611E13.2
158	70501362	12	rs76712326	T	C	0.951606	0.0170489	0.00431935	8.9e-05	0.953444	0.0139658	0.00605072	0.022	0.949752	0.0194238	0.00620296	0.0016					-	-	RP11-611E13.2
159	70501844	12	rs77275828	C	T	0.951602	0.0170441	0.0043191	9e-05	0.953438	0.0139569	0.00604997	0.022	0.949752	0.0194238	0.00620296	0.0016					-	-	RP11-611E13.2
160	70796729	12	rs11178221	T	C	0.317649	-0.00794065	0.0020408	9e-05	0.312427	-0.00584305	0.0028016	0.038	0.322914	-0.0104326	0.00299001	0.00061	0.312427	-0.00584305	0.0028016	0.256637	-	-	KCNMB4
161	70798405	12	rs7308623	G	A	0.299126	-0.00826194	0.00206928	6.1e-05	0.292594	-0.00660006	0.00285695	0.021	0.305711	-0.0101777	0.00301477	0.0011					-	-	KCNMB4
162	76349145	12	rs145271829	G	A	0.983563	-0.0247794	0.00757919	0.00093	0.983245	-0.0421119	0.010391	5.3e-05	0.983885	-0.0140204	0.0111166	0.2	0.983245	-0.0421119	0.010391	0.0615379	-	-	RP11-114H23.1; RN7SL734P; RP11-290L1.7; RP11-290L1.5
163	76400565	12	rs57761893	C	T	0.969192	-0.0236838	0.00548093	1.1e-05	0.970874	-0.0169454	0.00776623	0.028	0.967496	-0.03132	0.00778864	4.3e-05					tryptophan measurement, meningeal tuberculosis	van Laarhoven A, Lancet Infect Dis, 2018	RP11-114H23.1; PHLDA1; RP11-290L1.3
164	83491245	12	rs12304968	T	C	0.858627	-0.0106479	0.00267441	6e-05	0.859198	-0.0146098	0.00365666	6.2e-05	0.858051	-0.00752442	0.00393365	0.051	0.859198	-0.0146098	0.00365666	0.181528	-	-	TMTC2
165	83647444	12	rs12580743	T	C	0.660027	0.00572184	0.00198646	0.0042	0.657608	-0.00173026	0.00274702	0.52	0.662465	0.0131023	0.00288838	2.9e-06	0.657608	-0.00173026	0.00274702	0.000164191	diverticulitis	Maguire LH, Nat Genet, 2018	-
166	85506896	12	rs146797452	T	G	0.979529	-0.00910795	0.00671788	0.18	0.979813	-0.0371072	0.0093236	6.5e-05	0.979242	0.0144068	0.00973284	0.12	0.979813	-0.0371072	0.0093236	0.000108457	femoral neck bone mineral density	Pei YF, Bone, 2016	LRRIQ1
167	85525364	12	rs79603211	T	C	0.979288	-0.00923386	0.00663911	0.17	0.97958	-0.0367787	0.00922166	6.3e-05	0.978994	0.0138459	0.00961119	0.13					femoral neck bone mineral density	Pei YF, Bone, 2016	LRRIQ1
168	85559999	12	rs141238343	G	A	0.979139	-0.00903011	0.00660817	0.18	0.979365	-0.0363533	0.00914408	6.7e-05	0.978911	0.0141258	0.009602	0.12	0.979365	-0.0363533	0.00914408	0.000115443	synophrys measurement	Pickrell JK, Nat Genet, 2016	LRRIQ1
169	85600299	12	rs116236029	C	T	0.978683	-0.0087161	0.00661838	0.2	0.978848	-0.0357746	0.00915407	9.1e-05	0.978517	0.0142893	0.00962113	0.12	0.978848	-0.0357746	0.00915407	0.000134582	synophrys measurement	Pickrell JK, Nat Genet, 2016	LRRIQ1
170	85608627	12	rs142294288	C	T	0.979389	-0.0099805	0.00679205	0.15	0.979555	-0.0374012	0.00938138	6.7e-05	0.979223	0.0135742	0.0098871	0.15	0.979555	-0.0374012	0.00938138	0.000152004	-	-	LRRIQ1
171	85744534	12	rs6539890	C	A	0.46168	0.00754174	0.00187346	5.6e-05	0.468332	0.00698012	0.00255993	0.0057	0.454973	0.00798718	0.00275837	0.0057					forced expiratory volume; vital capacity;	Wyss AB, Nat Commun, 2018; Shrine N, Nat Genet, 2019	RP11-408B11.2
172	85749313	12	rs1533221	A	G	0.454712	0.0079264	0.00187451	2.2e-05	0.462276	0.00658193	0.00256291	0.0089	0.447087	0.00922086	0.00275848	0.0013	0.462276	0.00658193	0.00256291	0.477842	forced expiratory volume; vital capacity	Wyss AB, Nat Commun, 2018	RP11-408B11.2
173	85786593	12	rs552045522	G	A	0.97551	-0.0115071	0.00648082	0.083	0.976281	-0.0399736	0.00908357	1.1e-05	0.974733	0.0122986	0.00930139	0.16					-	-	-
174	85790005	12	rs7973247	G	T	0.975475	-0.0116765	0.00647378	0.077	0.976192	-0.0402135	0.0090752	9.6e-06	0.974752	0.0121966	0.00928976	0.17					-	-	-
175	85798155	12	rs114293103	C	T	0.971976	-0.0110698	0.0059974	0.071	0.972937	-0.0331433	0.00840526	8.3e-05	0.971006	0.00709632	0.00860845	0.39	0.972937	-0.0331433	0.00840526	0.000705912	-	-	-
176	85815567	12	rs7965197	T	G	0.973657	-0.012627	0.0061821	0.045	0.974205	-0.035292	0.00860935	4.2e-05	0.973105	0.00665948	0.00892703	0.43					-	-	-
177	85831365	12	rs149692933	A	T	0.975016	-0.0117864	0.0064434	0.073	0.975625	-0.0391902	0.00901373	1.4e-05	0.974402	0.0110193	0.00926438	0.21	0.975625	-0.0391902	0.00901373	8.35274e-05	-	-	-
178	85863004	12	rs145839769	A	G	0.971665	-0.0110959	0.00604334	0.073	0.972628	-0.0338087	0.0084795	6.9e-05	0.970694	0.00732198	0.00866491	0.38	0.972628	-0.0338087	0.0084795	0.00059052	-	-	-
179	85877835	12	rs139943297	C	G	0.971076	-0.0118414	0.00600436	0.053	0.97218	-0.0331284	0.00844245	9e-05	0.969963	0.00493129	0.00859239	0.55	0.97218	-0.0331284	0.00844245	0.00137472	-	-	-
180	85897562	12	rs142804791	A	T	0.971253	-0.0129838	0.00617622	0.039	0.971934	-0.0371212	0.00861152	1.7e-05	0.970567	0.00702523	0.00890832	0.41	0.971934	-0.0371212	0.00861152	0.000307962	-	-	-
181	86004056	12	rs7978256	C	T	0.97113	-0.0105603	0.0056009	0.066	0.97153	-0.0312364	0.00774705	5.7e-05	0.970726	0.00863913	0.00814177	0.27					-	-	-
182	86019226	12	rs115623854	G	A	0.970028	-0.011889	0.00549005	0.035	0.970357	-0.0302748	0.00758835	7.2e-05	0.969696	0.00547932	0.00798623	0.46	0.970357	-0.0302748	0.00758835	0.00101291	-	-	AC021887.1
183	86033564	12	rs7133922	C	T	0.971532	-0.0118889	0.00556913	0.037	0.971985	-0.0305393	0.00772278	8e-05	0.971076	0.00573929	0.00807525	0.46					-	-	AC021887.1
184	86033889	12	rs75928210	G	A	0.971526	-0.0119271	0.00556858	0.036	0.971972	-0.030611	0.00772123	7.7e-05	0.971076	0.00573929	0.00807525	0.46					-	-	AC021887.1
185	86033908	12	rs74789632	G	T	0.971526	-0.0119271	0.00556858	0.036	0.971972	-0.030611	0.00772123	7.7e-05	0.971076	0.00573929	0.00807525	0.46					-	-	AC021887.1
186	86037547	12	rs142935642	G	T	0.972219	-0.0113637	0.00562044	0.047	0.972931	-0.0308324	0.00781946	8.3e-05	0.971502	0.00633544	0.00812381	0.42	0.972931	-0.0308324	0.00781946	0.000842711	-	-	AC021887.1
187	86040641	12	rs116628704	A	T	0.971744	-0.0106188	0.00558442	0.063	0.972395	-0.0302804	0.00776312	9.9e-05	0.971089	0.00723461	0.00807802	0.35	0.972395	-0.0302804	0.00776312	0.000695815	-	-	AC021887.1
188	86043632	12	rs76857775	G	A	0.972207	-0.0114402	0.0056189	0.046	0.972906	-0.0309704	0.00781512	7.6e-05	0.971502	0.00633544	0.00812381	0.42					-	-	AC021887.1
189	86043940	12	rs28836233	C	A	0.972207	-0.0114402	0.0056189	0.046	0.972906	-0.0309704	0.00781512	7.6e-05	0.971502	0.00633544	0.00812381	0.42					-	-	AC021887.1
190	86044782	12	rs77521011	T	C	0.972207	-0.0114402	0.0056189	0.046	0.972906	-0.0309704	0.00781512	7.6e-05	0.971502	0.00633544	0.00812381	0.42					-	-	AC021887.1
191	86046942	12	rs114568611	G	T	0.972207	-0.0114402	0.0056189	0.046	0.972906	-0.0309704	0.00781512	7.6e-05	0.971502	0.00633544	0.00812381	0.42	0.972906	-0.0309704	0.00781512	0.000803287	-	-	AC021887.1
192	86065566	12	rs116051215	G	C	0.971991	-0.0107745	0.00559926	0.059	0.972861	-0.0310495	0.0078095	7.3e-05	0.971114	0.00724304	0.00807381	0.35	0.972861	-0.0310495	0.0078095	0.00055535	-	-	AC021887.1
193	86110069	12	rs76546311	T	G	0.972837	-0.0118299	0.00569962	0.041	0.97365	-0.0311084	0.00796408	9.8e-05	0.972017	0.00529453	0.00820406	0.5					-	-	-
194	86112699	12	rs77890546	A	G	0.972869	-0.0118019	0.00570828	0.042	0.973726	-0.03123	0.0079841	9.6e-05	0.972005	0.00540188	0.00820881	0.49					-	-	-
195	86115625	12	rs116766479	C	A	0.97316	-0.0126359	0.00578473	0.031	0.974136	-0.032458	0.00812262	6.7e-05	0.972176	0.00447778	0.00828835	0.57	0.974136	-0.032458	0.00812262	0.00126667	hair colour measurement	Kichaev G, Am J Hum Genet, 2018	-
196	86131135	12	rs75583102	A	G	0.974072	-0.0135745	0.00592255	0.023	0.97505	-0.0340925	0.00831918	4.3e-05	0.973086	0.00395707	0.00848294	0.62					hair colour measurement	Kichaev G, Am J Hum Genet, 2018	-
197	86132589	12	rs115797716	A	G	0.974104	-0.0142234	0.00594449	0.018	0.975057	-0.0340509	0.00834203	4.7e-05	0.973143	0.00283081	0.00852199	0.72	0.975057	-0.0340509	0.00834203	0.00173492	hair colour measurement	Kichaev G, Am J Hum Genet, 2018	-
198	86134253	12	rs544403655	A	G	0.976336	-0.0134766	0.00625764	0.034	0.977019	-0.0340522	0.00870762	9.2e-05	0.975649	0.00515026	0.00904321	0.54					hair colour measurement	Kichaev G, Am J Hum Genet, 2018	-
199	86135263	12	rs116219185	C	G	0.974053	-0.0142088	0.0059473	0.018	0.975063	-0.0341535	0.0083495	4.5e-05	0.973035	0.00321066	0.00852271	0.69	0.975063	-0.0341535	0.0083495	0.00151569	hair colour measurement	Kichaev G, Am J Hum Genet, 2018	-
200	86136949	12	rs115595104	C	A	0.974151	-0.0140209	0.00598869	0.021	0.975189	-0.0339256	0.00839523	5.6e-05	0.973105	0.00345445	0.00859397	0.67	0.975189	-0.0339256	0.00839523	0.00162651	hair colour measurement	Kichaev G, Am J Hum Genet, 2018	-
201	87920538	12	rs78801338	G	A	0.987266	-0.0346542	0.00888795	9.9e-05	0.987295	-0.0587425	0.0122517	1.8e-06	0.987236	-0.0164964	0.0129641	0.23					-	-	-
202	87920841	12	rs187914804	G	A	0.987171	-0.0347411	0.00886399	9.1e-05	0.987175	-0.0588027	0.0122148	1.6e-06	0.987166	-0.0165952	0.0129333	0.22	0.987175	-0.0588027	0.0122148	0.016268	-	-	-
203	87924029	12	rs149377438	G	A	0.986569	-0.0342867	0.00862464	7.6e-05	0.986544	-0.0579472	0.0118661	1.2e-06	0.986594	-0.016329	0.0126043	0.22	0.986544	-0.0579472	0.0118661	0.0149002	-	-	-
204	87926928	12	rs186712159	C	A	0.986759	-0.0323334	0.00857543	0.00018	0.98674	-0.055168	0.0117699	3.1e-06	0.986778	-0.0149903	0.0125633	0.26	0.98674	-0.055168	0.0117699	0.0180991	-	-	-
205	87928263	12	rs112094067	A	G	0.981296	-0.0293569	0.00716276	4.4e-05	0.982166	-0.0413152	0.0101786	5.7e-05	0.980418	-0.0212024	0.0101512	0.034	0.982166	-0.0413152	0.0101786	0.156486	-	-	-
206	87929395	12	rs138346366	C	G	0.987364	-0.0301488	0.00875664	0.00063	0.987245	-0.0528066	0.0119772	1.2e-05	0.987484	-0.0129075	0.0128746	0.35	0.987245	-0.0528066	0.0119772	0.0215661	-	-	-
207	87930452	12	rs111972647	A	C	0.981277	-0.0294481	0.00715586	4.2e-05	0.982141	-0.0413951	0.0101648	5.4e-05	0.980406	-0.0213095	0.010145	0.033	0.982141	-0.0413951	0.0101648	0.156638	-	-	-
208	87931244	12	rs145001631	T	C	0.987364	-0.0301488	0.00875664	0.00063	0.987245	-0.0528066	0.0119772	1.2e-05	0.987484	-0.0129075	0.0128746	0.35	0.987245	-0.0528066	0.0119772	0.0215661	-	-	-
209	87933967	12	rs80207518	T	C	0.986582	-0.0308511	0.00838072	0.00026	0.986563	-0.0519626	0.0115203	7.2e-06	0.9866	-0.0149214	0.0122589	0.25					-	-	-
210	87938675	12	rs149937819	C	T	0.98103	-0.0283383	0.00701444	5.8e-05	0.98187	-0.0398195	0.00997907	7.5e-05	0.980183	-0.0205651	0.00993092	0.036	0.98187	-0.0398195	0.00997907	0.166018	-	-	-
211	87941901	12	rs144573706	T	C	0.986487	-0.0312691	0.00836858	0.00021	0.986462	-0.0523211	0.0114999	6e-06	0.986511	-0.0155454	0.0122452	0.23	0.986462	-0.0523211	0.0114999	0.0266146	-	-	-
212	87943014	12	rs73193479	A	G	0.98045	-0.0277791	0.00692919	6.5e-05	0.98105	-0.0375985	0.00978564	0.00014	0.979846	-0.0210451	0.00987517	0.031					-	-	-
213	87943533	12	rs112066496	A	G	0.982053	-0.0292603	0.00718807	5e-05	0.983283	-0.0433403	0.0103393	3.3e-05	0.980813	-0.0201388	0.0100804	0.042	0.983283	-0.0433403	0.0103393	0.103681	-	-	-
214	87944498	12	rs111441441	G	A	0.981033	-0.0283615	0.00701442	5.7e-05	0.981876	-0.0398678	0.00997903	7.4e-05	0.980183	-0.0205651	0.00993092	0.036	0.981876	-0.0398678	0.00997903	0.164957	-	-	-
215	87948248	12	rs115994322	C	T	0.986597	-0.0329083	0.00839442	9.8e-05	0.986551	-0.0526923	0.0115198	5.4e-06	0.986645	-0.0186364	0.0123	0.15	0.986551	-0.0526923	0.0115198	0.0406954	-	-	-
216	87954893	12	rs144216948	A	G	0.986597	-0.0329083	0.00839442	9.8e-05	0.986551	-0.0526923	0.0115198	5.4e-06	0.986645	-0.0186364	0.0123	0.15	0.986551	-0.0526923	0.0115198	0.0406954	-	-	-
217	87959976	12	rs112037476	G	T	0.981122	-0.028852	0.0070074	4.1e-05	0.982028	-0.0406221	0.00998617	5.4e-05	0.980209	-0.021009	0.00990599	0.031	0.982028	-0.0406221	0.00998617	0.157898	-	-	-
218	87961399	12	12:87961399	T	C	0.986582	-0.0323488	0.00837666	0.00013	0.986607	-0.0534847	0.011529	3.9e-06	0.986556	-0.0167408	0.0122375	0.19	0.986607	-0.0534847	0.011529	0.0268753	-	-	-
219	87966152	12	rs138347710	T	C	0.98667	-0.0322788	0.00840466	0.00014	0.986721	-0.0538081	0.0115802	3.8e-06	0.986619	-0.0164219	0.0122648	0.2	0.986721	-0.0538081	0.0115802	0.0247889	-	-	-
220	87970665	12	rs146791699	T	C	0.986705	-0.0325976	0.00839311	0.00011	0.986765	-0.0539436	0.0115678	3.4e-06	0.986645	-0.0170181	0.0122443	0.19	0.986765	-0.0539436	0.0115678	0.026412	-	-	-
221	88822913	12	rs75405444	C	T	0.902853	0.00575594	0.0032094	0.077	0.899893	-0.00577769	0.00435406	0.18	0.905838	0.0186577	0.00476062	9.5e-05					mean corpuscular hemoglobin; leukocyte count; erythrocyte count; mean corpuscular volume; myeloid white cell count; neutrophil count; granulocyte count; neutrophil count, eosinophil count; neutrophil count, basophil count; trans/cis-18:2 fatty acid measurement, trans fatty acid measurement	Kichaev G, Am J Hum Genet, 2018; van der Harst P, Nature, 2012; Astle WJ, Cell, 2016; Mozaffarian D, Am J Clin Nutr, 2014	Y_RNA
222	89575794	12	rs146650766	G	A	0.985514	-0.0203436	0.00793696	0.0082	0.984822	-0.0427621	0.0107237	6.1e-05	0.986212	-0.00248812	0.0118239	0.86	0.984822	-0.0427621	0.0107237	0.0106155	-	-	RP11-13A1.3
223	91969367	12	rs7960975	T	C	0.730881	0.00928159	0.00211345	9.7e-06	0.725599	0.0103449	0.00289738	0.00036	0.736206	0.00977937	0.00310088	0.0023					sudden cardiac arrest; DNA methylation	Aouizerat BE, BMC Cardiovasc Disord, 2011; Zhang Q, Genome Med, 2018	-
224	91972172	12	rs12298388	C	T	0.730976	0.00938347	0.00211214	7.6e-06	0.725606	0.0103176	0.00289446	0.00037	0.73639	0.010037	0.00310022	0.0017	0.725606	0.0103176	0.00289446	0.946581	sudden cardiac arrest; DNA methylation	Aouizerat BE, BMC Cardiovasc Disord, 2011; Zhang Q, Genome Med, 2018	-
225	91988567	12	rs60915243	C	T	0.721751	0.00896863	0.00207026	1.2e-05	0.71726	0.00875356	0.00282937	0.002	0.726278	0.0107054	0.00304704	0.00063					facial morphology measurement; sudden cardiac arrest	Lee MK, PLoS One, 2017; Aouizerat BE, BMC Cardiovasc Disord, 2011	-
226	91991422	12	rs9738041	A	C	0.692235	-0.00802591	0.00204008	8.3e-05	0.692859	-0.00791283	0.00280852	0.0053	0.691605	-0.00936915	0.00297962	0.0019					facial morphology measurement; sudden cardiac arrest	Lee MK, PLoS One, 2017; Aouizerat BE, BMC Cardiovasc Disord, 2011	-
227	91992591	12	rs6538285	T	C	0.691747	-0.00816284	0.00203697	6e-05	0.691951	-0.00810228	0.00280551	0.0042	0.691542	-0.00937117	0.00297368	0.0018					facial morphology measurement; sudden cardiac arrest	Lee MK, PLoS One, 2017; Aouizerat BE, BMC Cardiovasc Disord, 2011	-
228	91995333	12	rs7489031	C	T	0.439204	-0.00736678	0.00189445	9.7e-05	0.445963	-0.00782671	0.00258596	0.0025	0.43239	-0.00814478	0.00279231	0.0041					facial morphology measurement; sudden cardiac arrest	Lee MK, PLoS One, 2017; Aouizerat BE, BMC Cardiovasc Disord, 2011	-
229	91995391	12	rs4457821	C	T	0.437674	-0.00749627	0.00189368	7.3e-05	0.444108	-0.00778763	0.00258827	0.0027	0.431188	-0.00840924	0.00278728	0.0029					facial morphology measurement; sudden cardiac arrest	Lee MK, PLoS One, 2017; Aouizerat BE, BMC Cardiovasc Disord, 2011	-
230	91995502	12	rs4534653	A	T	0.519546	-0.00855704	0.00189924	6.7e-06	0.526041	-0.00909037	0.00262743	0.00058	0.512999	-0.00904595	0.00276132	0.0012					facial morphology measurement; sudden cardiac arrest	Lee MK, PLoS One, 2017; Aouizerat BE, BMC Cardiovasc Disord, 2011	-
231	91995611	12	rs4304851	C	T	0.437592	-0.00753368	0.00189414	6.8e-05	0.444007	-0.00781293	0.00258848	0.0026	0.431124	-0.00845564	0.00278844	0.0028					facial morphology measurement; sudden cardiac arrest	Lee MK, PLoS One, 2017; Aouizerat BE, BMC Cardiovasc Disord, 2011	-
232	92003108	12	rs2130401	G	A	0.439533	-0.00749563	0.00190114	7.9e-05	0.446152	-0.007576	0.00259884	0.0036	0.432861	-0.00866103	0.00279791	0.0023	0.446152	-0.007576	0.00259884	0.773532	facial morphology measurement; sudden cardiac arrest	Lee MK, PLoS One, 2017; Aouizerat BE, BMC Cardiovasc Disord, 2011	-
233	92012201	12	rs1489895	T	C	0.606157	-0.0079896	0.00190191	2.8e-05	0.607242	-0.00651364	0.00263285	0.014	0.605062	-0.0102965	0.00276247	0.00023	0.607242	-0.00651364	0.00263285	0.315417	facial morphology measurement	Lee MK, PLoS One, 2017	-
234	92014829	12	rs3989963	T	G	0.607322	-0.00777399	0.00192459	4.9e-05	0.603817	-0.00816194	0.00266981	0.0022	0.610856	-0.00881253	0.00278993	0.0024					facial morphology measurement	Lee MK, PLoS One, 2017	-
235	92034860	12	rs7298828	T	C	0.516117	0.00767062	0.00188369	3.8e-05	0.518521	0.00729629	0.00257336	0.0049	0.513692	0.00957537	0.00277316	0.00085					-	-	-
236	92046691	12	rs6538287	T	C	0.510768	-0.00749447	0.00187833	5.9e-05	0.509463	-0.00708128	0.0025764	0.0061	0.512083	-0.00902193	0.00275365	0.0012					-	-	-
237	92050303	12	rs11106230	A	G	0.512525	0.00756817	0.0018849	4.9e-05	0.515197	0.00733026	0.00257511	0.0047	0.509832	0.00931217	0.00277488	0.0012	0.515197	0.00733026	0.00257511	0.595972	-	-	RP11-1041F24.1
238	92050477	12	12:92050477	A	T	0.624531	-0.00809896	0.00194789	3e-05	0.61972	-0.00856635	0.00268881	0.0014	0.629382	-0.00899248	0.00283787	0.0027	0.61972	-0.00856635	0.00268881	0.912098	-	-	RP11-1041F24.1
239	92050768	12	rs1352642	G	A	0.624639	-0.00811242	0.00194835	2.9e-05	0.619802	-0.0085766	0.00268962	0.0014	0.629515	-0.00900119	0.00283833	0.0027	0.619802	-0.0085766	0.00268962	0.912434	-	-	RP11-1041F24.1
240	92781680	12	rs75443116	A	G	0.966668	0.0234831	0.00535876	1.3e-05	0.967386	0.0238279	0.00739957	0.0013	0.965944	0.0246289	0.00780316	0.0017					erythrocyte count; clostridium difficile infection, multiple myeloma	Kichaev G, Am J Hum Genet, 2018; Apewokin S, Support Care Cancer, 2018	-
241	92787670	12	rs116535556	A	G	0.9665	0.0233637	0.0053658	1.5e-05	0.967354	0.0235208	0.00742743	0.0016	0.965639	0.0246736	0.00779452	0.0016	0.967354	0.0235208	0.00742743	0.913649	erythrocyte count; clostridium difficile infection, multiple myeloma	Kichaev G, Am J Hum Genet, 2018; Apewokin S, Support Care Cancer, 2018	-
242	92790167	12	rs116225998	G	T	0.966592	0.0231292	0.00538409	1.9e-05	0.967354	0.0231865	0.00744945	0.0019	0.965823	0.0247033	0.00782444	0.0017	0.967354	0.0231865	0.00744945	0.88693	clostridium difficile infection, multiple myeloma	Apewokin S, Support Care Cancer, 2018	CLLU1OS
243	92850903	12	rs17251648	G	A	0.93395	0.0155785	0.00382105	6.1e-05	0.936059	0.0187705	0.0053521	0.00048	0.931824	0.0128321	0.00548793	0.02	0.936059	0.0187705	0.0053521	0.432706	-	-	RP11-693J15.4; RP11-693J15.5
244	93565872	12	rs75746644	T	C	0.879339	0.00932342	0.00283148	0.001	0.876482	0.00207871	0.00385533	0.63	0.882218	0.0176267	0.00418352	2.8e-05					non-alcoholic fatty liver disease, cirrhosis of liver	Chalasani N, Gastroenterology, 2010	RP11-511B23.2; RP11-511B23.3
245	96402341	12	rs116160643	G	C	0.986325	-0.0276073	0.00864477	0.0014	0.984828	-0.0449889	0.0115031	7.8e-05	0.987834	-0.0103462	0.0131068	0.48	0.984828	-0.0449889	0.0115031	0.044252	blood metabolite measurement, protein measurement, amino acid measurement; sunburn; vitamin D measurement; blood protein measurement	Kettunen J, Nat Commun, 2016; Kichaev G, Am J Hum Genet, 2018; Manousaki D, Am J Hum Genet, 2017; Emilsson V, Science, 2018	HAL; RP11-256L6.3; LTA4H; RP11-256L6.2
246	96768371	12	rs71438996	G	A	0.966034	-0.0117293	0.00503731	0.023	0.964623	-0.0283382	0.00685834	4.9e-05	0.967457	0.00629485	0.00744289	0.32					-	-	CDK17; RP11-117N2.2
247	96768705	12	rs71438997	C	T	0.965904	-0.0115584	0.00502889	0.024	0.96449	-0.0282963	0.00684671	4.9e-05	0.96733	0.0065644	0.00743064	0.3					-	-	CDK17; RP11-117N2.2
248	96773477	12	rs12824368	G	A	0.966152	-0.0115075	0.00504849	0.026	0.964755	-0.0283291	0.00686387	5e-05	0.967559	0.0068868	0.0074706	0.29	0.964755	-0.0283291	0.00686387	0.00043907	-	-	CDK17; RP11-117N2.2
249	96774648	12	rs77515025	G	C	0.966152	-0.0115075	0.00504849	0.026	0.964755	-0.0283291	0.00686387	5e-05	0.967559	0.0068868	0.0074706	0.29					-	-	CDK17; RP11-117N2.2
250	96781461	12	rs34380884	T	C	0.966123	-0.0116143	0.0050479	0.024	0.964654	-0.0284926	0.00686052	4.5e-05	0.967604	0.00690166	0.00747278	0.29					-	-	CDK17; RP11-117N2.2
251	96783969	12	rs112575345	G	A	0.966101	-0.0116356	0.00504781	0.024	0.964648	-0.0284842	0.00686057	4.5e-05	0.967566	0.00683753	0.0074724	0.29	0.964648	-0.0284842	0.00686057	0.000421425	eosinophil count; body weight	Kichaev G, Am J Hum Genet, 2018; Croteau-Chonka DC, Obesity (Silver Spring), 2010	CDK17; RP11-117N2.2
252	96784766	12	rs113753739	G	T	0.966123	-0.0116143	0.0050479	0.024	0.964654	-0.0284926	0.00686052	4.5e-05	0.967604	0.00690166	0.00747278	0.29	0.964654	-0.0284926	0.00686052	0.000410181	eosinophil count; body weight	Kichaev G, Am J Hum Genet, 2018; Croteau-Chonka DC, Obesity (Silver Spring), 2010	CDK17; RP11-117N2.2
253	96785361	12	rs34943694	G	A	0.96599	-0.0115725	0.00504727	0.025	0.964522	-0.0282403	0.00686047	5.3e-05	0.96747	0.00670527	0.0074709	0.3					eosinophil count; body weight	Kichaev G, Am J Hum Genet, 2018; Croteau-Chonka DC, Obesity (Silver Spring), 2010	CDK17; RP11-117N2.2
254	96786374	12	rs34106146	C	T	0.965987	-0.011617	0.00504724	0.024	0.964471	-0.0287065	0.0068565	3.9e-05	0.967515	0.007151	0.00747551	0.27					eosinophil count; body weight	Kichaev G, Am J Hum Genet, 2018; Croteau-Chonka DC, Obesity (Silver Spring), 2010	CDK17; RP11-117N2.2
255	96788017	12	rs142687817	C	T	0.966142	-0.0116389	0.00504664	0.024	0.964648	-0.0285355	0.00685572	4.3e-05	0.967648	0.00695169	0.00747452	0.28	0.964648	-0.0285355	0.00685572	0.000394996	eosinophil count; body weight	Kichaev G, Am J Hum Genet, 2018; Croteau-Chonka DC, Obesity (Silver Spring), 2010	CDK17; RP11-117N2.2
256	96788318	12	rs75362303	T	G	0.964153	-0.0145291	0.00491402	0.0037	0.962932	-0.0301766	0.00670261	9.3e-06	0.965384	0.00287457	0.0072466	0.59					eosinophil count; body weight	Kichaev G, Am J Hum Genet, 2018; Croteau-Chonka DC, Obesity (Silver Spring), 2010	CDK17; RP11-117N2.2
257	96791945	12	rs12809810	T	C	0.96619	-0.0116391	0.00504795	0.024	0.964635	-0.0285827	0.00685197	4.2e-05	0.967756	0.00702559	0.00748302	0.28	0.964635	-0.0285827	0.00685197	0.000379157	eosinophil count; body weight	Kichaev G, Am J Hum Genet, 2018; Croteau-Chonka DC, Obesity (Silver Spring), 2010	CDK17; RP11-117N2.2; RP11-510I5.4
258	96792633	12	rs35359599	G	A	0.966044	-0.0116539	0.00503778	0.024	0.964471	-0.0287252	0.00683426	3.6e-05	0.967629	0.00722453	0.00747255	0.27					eosinophil count; body weight	Kichaev G, Am J Hum Genet, 2018; Croteau-Chonka DC, Obesity (Silver Spring), 2010	CDK17; RP11-117N2.2; RP11-510I5.4
259	96793347	12	rs34376103	C	A	0.966044	-0.0116539	0.00503778	0.024	0.964471	-0.0287252	0.00683426	3.6e-05	0.967629	0.00722453	0.00747255	0.27					eosinophil count; body weight	Kichaev G, Am J Hum Genet, 2018; Croteau-Chonka DC, Obesity (Silver Spring), 2010	CDK17; RP11-117N2.2; RP11-510I5.4
260	96795322	12	rs71460348	T	C	0.966082	-0.0117273	0.00505136	0.023	0.964635	-0.0287915	0.00686481	3.8e-05	0.96754	0.00701408	0.00747836	0.28					eosinophil count; body weight	Kichaev G, Am J Hum Genet, 2018; Croteau-Chonka DC, Obesity (Silver Spring), 2010	CDK17; RP11-117N2.2; RP11-510I5.4
261	96795493	12	rs71460349	A	G	0.966082	-0.0116524	0.0050501	0.024	0.964629	-0.0287424	0.00686271	3.9e-05	0.967546	0.00712123	0.00747694	0.27					eosinophil count; body weight	Kichaev G, Am J Hum Genet, 2018; Croteau-Chonka DC, Obesity (Silver Spring), 2010	CDK17; RP11-117N2.2; RP11-510I5.4
262	96798612	12	rs76480002	G	A	0.966069	-0.0117346	0.00504738	0.023	0.964642	-0.0289641	0.006861	3.3e-05	0.967508	0.00717807	0.00747056	0.27					eosinophil count; body weight	Kichaev G, Am J Hum Genet, 2018; Croteau-Chonka DC, Obesity (Silver Spring), 2010	CDK17; RP11-117N2.2; RP11-510I5.4; RN7SKP11
263	96798851	12	rs35833161	C	T	0.96599	-0.0117375	0.005118	0.025	0.964408	-0.0289634	0.00694749	4.2e-05	0.967585	0.00715073	0.00758643	0.28					eosinophil count; body weight	Kichaev G, Am J Hum Genet, 2018; Croteau-Chonka DC, Obesity (Silver Spring), 2010	CDK17; RP11-117N2.2; RP11-510I5.4; RN7SKP11
264	102930071	12	rs116144140	A	C	0.910432	0.0116761	0.00331304	0.00043	0.909349	0.00307249	0.00451225	0.48	0.911524	0.0208446	0.00489302	1.6e-05	0.909349	0.00307249	0.00451225	0.0068491	intracranial volume measurement; fasting blood insulin measurement; body mass index, fasting blood insulin measurement	Klein M, Am J Psychiatry, 2019; Manning AK, Nat Genet, 2012	RP11-210L7.1
265	104946297	12	rs146513466	T	C	0.926837	-0.0118379	0.00355806	0.0009	0.925032	-0.0216447	0.00484779	7e-06	0.928657	-0.00149774	0.00525315	0.85	0.925032	-0.0216447	0.00484779	0.00431241	arachidonic acid measurement; stem Cell Growth Factor beta measurement	Dorajoo R, Genes Nutr, 2015; Ahola-Olli AV, Am J Hum Genet, 2016	CHST11
266	104957537	12	rs76960947	T	G	0.951609	-0.0113296	0.00433672	0.0098	0.952057	-0.0276241	0.00599237	4.1e-06	0.951157	0.00463499	0.00631045	0.4					blood protein measurement; stem Cell Growth Factor beta measurement	Sun BB, Nature, 2018; Ahola-Olli AV, Am J Hum Genet, 2016; Emilsson V, Science, 2018	CHST11
267	104959159	12	rs1810133	C	T	0.9474	-0.0115126	0.00424892	0.0071	0.948404	-0.0253836	0.00590315	1.7e-05	0.946388	0.00119211	0.00614974	0.72	0.948404	-0.0253836	0.00590315	0.00159197	blood protein measurement; stem Cell Growth Factor beta measurement	Sun BB, Nature, 2018; Ahola-Olli AV, Am J Hum Genet, 2016; Emilsson V, Science, 2018	CHST11
268	110834378	12	rs185422809	C	G	0.98706	-0.0166539	0.00835698	0.045	0.988323	-0.0490423	0.0123032	6.4e-05	0.985786	0.00784188	0.0114994	0.42	0.988323	-0.0490423	0.0123032	0.000624244	QT interval	van Setten J, Eur J Hum Genet, 2019	ANAPC7; RP11-478C19.2
269	110838801	12	rs151228959	G	C	0.987047	-0.0165727	0.00835455	0.046	0.988298	-0.0488361	0.012295	6.8e-05	0.985786	0.00784188	0.0114994	0.42	0.988298	-0.0488361	0.012295	0.000650415	QT interval	van Setten J, Eur J Hum Genet, 2019	ANAPC7; RP11-478C19.2
270	110927240	12	rs147356284	C	T	0.987003	-0.0166463	0.00834622	0.045	0.988166	-0.0480453	0.0122221	8e-05	0.985831	0.00738858	0.0115327	0.45	0.988166	-0.0480453	0.0122221	0.000835163	body mass index	Kichaev G, Am J Hum Genet, 2018	GPN3; FAM216A; VPS29; SNORD50; RAD9B
271	114881294	12	rs1248033	G	A	0.889346	0.00882192	0.00295532	0.0027	0.894777	0.0161125	0.00410107	8e-05	0.883872	0.00316857	0.00428471	0.51	0.894777	0.0161125	0.00410107	0.0270879	idiopathic dilated cardiomyopathy; breast carcinoma	Xu H, J Pers Med, 2018; Stevens KN, Hum Mol Genet, 2012	-
272	128572443	12	rs114943940	G	A	0.951454	-0.0148723	0.00442047	0.00068	0.951199	-0.0280534	0.00611867	4.7e-06	0.951711	-0.00244404	0.00642124	0.69	0.951199	-0.0280534	0.00611867	0.00345401	susceptibility to chronic sinus infection measurement	Tian C, Nat Commun, 2017	RP13-653N12.1
273	128872489	12	rs12311148	G	A	0.972698	-9.53445e-05	0.00597844	0.95	0.975284	0.0263343	0.00875923	0.0025	0.97009	-0.0207882	0.00826009	0.0066	0.975284	0.0263343	0.00875923	7.37492e-05	adolescent idiopathic scoliosis	Liu J, Hum Genet, 2018	TMEM132C; snoU13; RP11-553N19.1
274	129035930	12	rs144988661	T	C	0.987719	-0.0304204	0.00853629	0.00037	0.988241	-0.00830552	0.0121414	0.52	0.987192	-0.0508437	0.0120876	1.1e-05	0.988241	-0.00830552	0.0121414	0.0119165	adolescent idiopathic scoliosis	Liu J, Hum Genet, 2018	TMEM132C
275	129041728	12	rs149255262	C	T	0.984225	-0.0245625	0.00758417	0.0011	0.985163	-0.00521291	0.0106937	0.66	0.98328	-0.0428508	0.0108251	2.9e-05	0.985163	-0.00521291	0.0106937	0.0122414	-	-	TMEM132C
276	129481260	12	rs183446494	C	T	0.985498	-0.00116008	0.00787571	0.85	0.985907	-0.0328085	0.0109436	0.0026	0.985086	0.0313549	0.0113971	0.0085	0.985907	-0.0328085	0.0109436	3.911e-05	FEV change measurement, response to zileuton, asthma; aging	Dahlin A, Pharmacogenomics J, 2015; Edwards DR, Age (Dordr), 2012	GLT1D1; NLRP9P
277	130330331	12	rs11060587	A	G	0.668296	0.00786263	0.0019893	9.6e-05	0.670168	0.00600625	0.00271202	0.029	0.666408	0.00984534	0.00293497	0.00058	0.670168	0.00600625	0.00271202	0.330586	-	-	TMEM132D; RP11-572C21.1
278	130330563	12	rs9943767	T	C	0.668292	0.00786495	0.00198903	9.5e-05	0.670168	0.00599951	0.0027116	0.029	0.666402	0.00985431	0.00293461	0.00057					-	-	TMEM132D; RP11-572C21.1
[truncated: 4,060 more rows]

## Sheet: SuppTab_2_rsgwasdet
X	CHR	SNP	BP	ALLELE1	ALLELE0	A1FREQ_All	BETA_All	SE_All	P_BOLT_LMM_All	A1FREQ_Females	BETA_Females	SE_Females	P_BOLT_LMM_Females	A1FREQ_Males	BETA_Males	SE_Males	P_BOLT_LMM_Males	A1FREQ_SexDiff	BETA_SexDiff	SE_SexDiff	P_BOLT_LMM_SexDiff	CHR.cat	BEGIN	END	SNPS	FIRST.AUTHOR	DATE	JOURNAL	LINK	STUDY	DISEASE.TRAIT	INITIAL.SAMPLE.SIZE	REPLICATION.SAMPLE.SIZE	MAPPED_GENE	RISK.ALLELE.FREQUENCY	OR.or.BETA	P.VALUE	MAPPED_TRAIT	Ref	Distance to GWASCat SNPs
[truncated: 15,843 more rows]

[truncated: 1 more sheets: SuppTab_3windgwasdet]
