# Supplementary material for: Genetic associations with carotid intima-media thickness link to atherosclerosis biology with sex-differences in sub-Saharan Africans
Source: Research Square preprint supplement (doi:10.21203/rs.3.rs-147838/v1), 2021-01-22
Supplement: Supplementary file 10 [file fbd797436c634dfc8bb76a89.xlsx]

## Sheet: snps
uniqID	rsID	chr	pos	non_effect_allele	effect_allele	MAF		gwasP	beta	se	r2	IndSigSNP	GenomicLocus	nearestGene	dist	func	CADD	RDB	minChrState	commonChrState	posMapFilt	eqtlMapFilt	ciMapFilt
1:22687387:G:T	rs74946133	1	22687387	T	G	0.05295		0.00017	-0.0135244	0.00353724	0.637603	rs12048810	1	RP11-415K20.1	37562	intergenic	1.297	6	5	14	0	0	0
1:22687388:A:G	rs74633997	1	22687388	A	G	0.05295		0.00017	-0.0135244	0.00353724	0.637603	rs12048810	1	RP11-415K20.1	37563	intergenic	4.071	6	5	14	0	0	0
1:22687930:A:C	rs113570608	1	22687930	C	A	0.05295		0.00017	-0.0134507	0.00352969	0.637603	rs12048810	1	RP11-415K20.1	38105	intergenic	4.895	7	5	14	0	0	0
1:22688484:A:G	rs4655052	1	22688484	G	A	0.1218		0.00019	-0.0092557	0.0024802	0.664247	rs12048810	1	RP11-415K20.1	38659	intergenic	0.982	5	5	14	0	0	0
1:22689344:G:T	1:22689344	1	22689344	T	G	0.08775		2.8e-06	-0.0139378	0.00294401	0.926544	rs12048810	1	RP11-415K20.1	39519	intergenic	0.031	5	5	14	0	0	0
1:22689742:A:G	rs112063997	1	22689742	A	G	0.05371		0.00017	-0.013202	0.00346173	0.646091	rs12048810	1	RP11-415K20.1	39917	intergenic	0.722	2b	1	14	0	0	0
1:22690547:A:G	rs12048810	1	22690547	A	G	0.08321	0.91679	6.3e-07	-0.0149411	0.00297499	1	rs12048810	1	RP11-415K20.1	40722	intergenic	4.108	4	5	14	0	0	0
1:22691427:A:G	rs111396951	1	22691427	A	G	0.05371		0.00013	-0.0137552	0.00355206	0.626803	rs12048810	1	RP11-415K20.1	41602	intergenic	1.891	2b	5	14	0	0	0
1:68362712:A:G	rs113928341	1	68362712	G	A	0.0174		3.8e-06	0.0360962	0.00787351	1	rs113928341	2	GNG12-AS1	0	ncRNA_intronic	2.495	4	1	15	0	0	0
1:68368437:C:T	rs114344923	1	68368437	C	T	0.01513		0.00011	0.0335733	0.00875955	0.865495	rs113928341	2	GNG12-AS1	0	ncRNA_intronic	0.596	7	5	15	0	0	0
1:70168078:A:T	rs75208957	1	70168078	A	T	0.03177		4.7e-05	-0.0209214	0.00520703	0.976343	rs114048798	3	LRRC7	0	intronic	11.92	2b	5	15	0	0	0
1:70181382:C:T	rs114048798	1	70181382	C	T	0.03253		8.4e-06	-0.0226878	0.00515247	1	rs114048798	3	LRRC7	0	intronic	3.772	6	5	15	0	0	0
1:180898143:G:T	rs114183899	1	180898143	G	T	0.01967		0.012	-0.0195749	0.00796399	0.61189	rs7527331	4	KIAA1614	0	intronic	1.355	5	1	5	0	0	0
1:180903119:A:G	rs149591125	1	180903119	A	G	0.03404		1.9e-05	-0.0228097	0.0053621	0.978266	rs7527331	4	KIAA1614	0	intronic	NA	7	4	5	0	0	0
1:180909375:A:G	rs114496480	1	180909375	A	G	0.02345		0.0041	-0.0180405	0.00634685	0.717485	rs7527331	4	KIAA1614	0	intronic	0.893	7	4	5	0	0	0
1:180909876:A:G	rs7527331	1	180909876	A	G	0.03328		9.1e-06	-0.0232901	0.00526601	1	rs7527331	4	KIAA1614	0	intronic	2.399	7	4	5	0	0	0
1:222649491:C:G	rs71642766	1	222649491	G	C	0.3843		0.0086	0.0050685	0.001928	0.606303	rs67416193	5	CICP13	5266	intergenic	0.598	7	15	15	0	0	0
1:222666445:C:G	rs67416193	1	222666445	C	G	0.3215		1.2e-06	0.00971533	0.00202191	1	rs67416193	5	RNU6-791P	10528	intergenic	0.075	7	15	15	0	0	0
1:222673217:A:G	rs113225968	1	222673217	G	A	0.3245		0.00038	0.00709226	0.00201709	0.634109	rs67416193	5	RNU6-791P	3756	intergenic	6.406	7	9	15	0	0	0
1:222673983:C:G	rs71211955	1	222673983	G	C	0.3457		9.8e-05	0.00760378	0.00197471	0.798553	rs67416193	5	RNU6-791P	2990	intergenic	NA	6	15	15	0	0	0
1:227990713:C:T	rs10799452	1	227990713	T	C	0.2148		5.2e-06	-0.0108253	0.00235172	0.875638	rs12075593	6	PRSS38	12680	intergenic	8.573	6	5	15	0	0	0
1:227993868:C:G	rs12057467	1	227993868	C	G	0.2163		6e-06	-0.0107644	0.00235426	0.875102	rs12075593	6	PRSS38	9525	intergenic	NA	4	5	15	0	0	0
1:227996064:A:G	rs6702713	1	227996064	G	A	0.2156		6.7e-06	-0.0107088	0.00235382	0.879407	rs12075593	6	PRSS38	7329	intergenic	1.735	5	5	15	0	0	0
1:227999132:C:T	rs12075593	1	227999132	T	C	0.2383		1.3e-06	-0.0111851	0.00228815	1	rs12075593	6	PRSS38	4261	intergenic	4.16	7	9	15	0	0	0
1:228003967:A:G	rs12121588	1	228003967	A	G	0.2163		6.5e-06	-0.0107256	0.00235394	0.875102	rs12075593	6	PRSS38	0	intronic	3.591	5	7	15	0	0	0
1:228006435:C:T	rs10916216	1	228006435	C	T	0.2693		0.0012	-0.00696133	0.00212184	0.655533	rs12075593	6	PRSS38	0	intronic	NA	5	9	15	0	0	0
1:228008213:A:G	rs10916218	1	228008213	A	G	0.2163		6.1e-06	-0.0107736	0.00235664	0.875102	rs12075593	6	PRSS38	0	intronic	0.232	5	9	15	0	0	0
1:228009844:A:C	rs10916221	1	228009844	A	C	0.2156		7.9e-06	0.0106251	0.00235255	0.879407	rs12075593	6	PRSS38	0	intronic	3.876	7	9	15	0	0	0
1:228009853:C:G	rs10916222	1	228009853	G	C	0.2156		7.9e-06	0.0106251	0.00235255	0.879407	rs12075593	6	PRSS38	0	intronic	1.552	7	9	15	0	0	0
1:228010782:C:T	rs7410917	1	228010782	T	C	0.2141		6.4e-06	0.0107295	0.0023535	0.871724	rs12075593	6	PRSS38	0	intronic	6.013	5	9	15	0	0	0
1:228013938:A:C	rs10916223	1	228013938	C	A	0.1936		5.2e-06	0.0113227	0.00245694	0.741497	rs12075593	6	PRSS38	0	intronic	5.753	7	9	15	0	0	0
2:43197221:C:G	rs11124906	2	43197221	C	G	0.171		7.1e-06	-0.0112703	0.00250012	1	rs11124906	7	AC016735.1	31273	intergenic	1.44	4	2	15	0	0	0
2:45678606:A:C	rs115794329	2	45678606	A	C	0.02042		4.9e-06	-0.0305691	0.00671302	1	rs115794329	8	SRBD1	0	intronic	0.017	7	5	15	0	0	0
2:77830037:A:G	rs114423558	2	77830037	G	A	0.02118		4.6e-06	-0.0354739	0.00773719	1	rs114423558	9	LRRTM4	9591	intergenic	4.122	6	5	15	0	0	0
2:104636420:C:T	rs113737238	2	104636420	T	C	0.04236		2e-06	-0.0242705	0.00514687	1	rs113737238	10	RP11-76I14.1	0	ncRNA_intronic	2.7	7	5	15	0	0	0
2:158176432:C:T	rs16841605	2	158176432	C	T	0.1293		0.00034	-0.00990319	0.00281433	0.634917	rs79324236	11	ERMN	0	UTR3	0.146	7	5	15	0	0	0
2:158176774:C:T	rs16841607	2	158176774	T	C	0.1293		0.00043	-0.00973719	0.00281473	0.634917	rs79324236	11	ERMN	0	UTR3	10.77	7	5	15	0	0	0
2:158185841:A:G	rs79324236	2	158185841	A	G	0.08623		5.9e-06	-0.0149812	0.00335422	1	rs79324236	11	ERMN	1615	intergenic	4.054	5	5	15	0	0	0
3:113959161:A:G	rs72946673	3	113959161	A	G	0.1135		0.00082	0.0102031	0.00305219	0.710382	rs72948659	12	ZNF80	2735	intergenic	2.885	5	5	15	0	0	0
3:114016233:C:G	rs72948659	3	114016233	G	C	0.1029		3.2e-06	0.0143869	0.00308101	1	rs72948659	12	TIGIT	0	intronic	3.57	7	1	15	0	0	0
3:126986232:A:G	rs111841639	3	126986232	G	A	0.1233		0.0029	0.00961474	0.00317088	0.603509	rs6439045	13	RP11-88I21.1	16691	intergenic	1.798	7	5	15	0	0	0
3:126988939:C:T	rs6414305	3	126988939	T	C	0.1755		0.00086	-0.00876029	0.00258046	0.834828	rs6439045	13	RP11-88I21.1	13984	intergenic	6.387	7	5	15	0	0	0
3:126990386:C:G	rs74634375	3	126990386	C	G	0.1127		0.0004	0.0116761	0.0032413	0.683941	rs6439045	13	RP11-88I21.1	12537	intergenic	0.027	7	5	15	0	0	0
3:126990806:C:T	rs6439045	3	126990806	C	T	0.1513		9.7e-06	-0.0127992	0.00285706	1	rs6439045	13	RP11-88I21.1	12117	intergenic	4.578	7	5	15	0	0	0
3:126993290:A:G	rs75514031	3	126993290	A	G	0.112		0.00035	0.0118306	0.00325746	0.690223	rs6439045	13	RP11-88I21.1	9633	intergenic	2.069	7	2	15	0	0	0
3:126995506:A:C	rs74544902	3	126995506	A	C	0.1127		0.00037	0.0117545	0.00324945	0.683941	rs6439045	13	RP11-88I21.1	7417	intergenic	0.732	5	7	15	0	0	0
3:126996902:A:G	rs77382620	3	126996902	A	G	0.112		0.00037	0.0118722	0.00328218	0.690223	rs6439045	13	RP11-88I21.1	6021	intergenic	4.431	6	7	15	0	0	0
3:127002357:A:G	rs67321982	3	127002357	A	G	0.1899		0.00094	-0.00820355	0.00245541	0.680573	rs6439045	13	RP11-88I21.1	566	downstream	0.121	5	9	15	0	0	0
3:175893472:G:T	rs114275839	3	175893472	T	G	0.04387		6.9e-06	0.0190711	0.00424382	1	rs114275839	14	RP11-78E6.1	61146	intergenic	0.419	7	5	15	0	0	0
3:175895654:A:G	rs116132190	3	175895654	G	A	0.03782		5.2e-05	0.0178144	0.00439628	0.826047	rs114275839	14	RP11-78E6.1	63328	intergenic	4.126	5	5	15	0	0	0
3:190728196:C:T	rs9844898	3	190728196	T	C	0.4758		0.007	0.00513785	0.00191592	0.676225	rs9872132	15	GMNC	117977	intergenic	0.119	6	15	15	0	0	0
3:190728632:C:T	rs13100278	3	190728632	T	C	0.4342		6.7e-06	-0.00875032	0.00195355	0.990321	rs9872132	15	GMNC	118413	intergenic	0.649	7	15	15	0	0	0
3:190733637:C:T	rs9872132	3	190733637	T	C	0.4334		6.6e-06	-0.0087593	0.00195533	1	rs9872132	15	GMNC	123418	intergenic	0.946	7	9	15	0	0	0
3:190734564:C:T	rs73069613	3	190734564	T	C	0.4758		0.016	0.00456859	0.00192054	0.67516	rs9872132	15	GMNC	124345	intergenic	0.988	7	9	15	0	0	0
3:190735523:C:T	rs73069616	3	190735523	T	C	0.4766		0.011	0.00477247	0.00190025	0.676326	rs9872132	15	GMNC	125304	intergenic	2.769	7	9	15	0	0	0
3:190735967:C:T	rs7633801	3	190735967	T	C	0.475		0.0065	0.00512861	0.00189892	0.67294	rs9872132	15	GMNC	125748	intergenic	1.39	7	9	15	0	0	0
4:89883979:C:T	rs7671167	4	89883979	T	C	0.4191		0.00028	-0.00663989	0.00183251	0.724159	rs2013701	16	FAM13A	0	intronic	1.8	6	5	15	0	0	0
4:89885086:G:T	rs2013701	4	89885086	T	G	0.4773		2.4e-06	-0.00864623	0.00183783	1	rs2013701	16	FAM13A	0	intronic	0.436	4	2	15	0	0	0
4:89885714:C:T	rs2904259	4	89885714	C	T	0.4085		0.00013	-0.00702064	0.00184148	0.758027	rs2013701	16	FAM13A	0	intronic	2.46	4	5	15	0	0	0
4:89886297:C:T	rs1903003	4	89886297	T	C	0.3699		0.0013	-0.00605239	0.00188845	0.641383	rs2013701	16	FAM13A	0	intronic	1.529	5	5	15	0	0	0
4:158466837:A:G	rs1369025	4	158466837	G	A	0.416		0.00011	-0.00731767	0.0018818	0.738834	rs2014197	17	RP11-364P22.1	26804	intergenic	1.785	7	15	15	0	0	0
4:158467079:C:G	rs1369026	4	158467079	G	C	0.472		3.7e-05	-0.0077586	0.00187187	0.941251	rs2014197	17	RP11-364P22.1	26562	intergenic	0.34	6	15	15	0	0	0
4:158467213:A:G	rs1434379	4	158467213	G	A	0.472		3.7e-05	-0.00775329	0.00187047	0.941251	rs2014197	17	RP11-364P22.1	26428	intergenic	2.686	7	9	15	0	0	0
4:158470819:G:T	rs4690886	4	158470819	T	G	0.4735		1.2e-05	-0.00832025	0.00189502	0.947047	rs2014197	17	RP11-364P22.1	22822	intergenic	0.746	6	14	15	0	0	0
4:158473449:C:G	rs2014197	4	158473449	C	G	0.4735		4.1e-06	-0.00879133	0.00190513	1	rs2014197	17	RP11-364P22.1	20192	intergenic	0.038	7	9	15	0	0	0
4:166256812:C:G	rs1866218	4	166256812	C	G	0.2617		0.002	0.00641894	0.00210115	0.67502	rs7690328	18	MSMO1	0	intronic	0.52	5	2	5	0	0	0
4:166257119:C:T	rs1866219	4	166257119	T	C	0.2451		0.0007	0.00728546	0.00215653	0.736545	rs7690328	18	MSMO1	0	intronic	2.405	7	4	5	0	0	0
4:166257606:C:G	rs934816	4	166257606	C	G	0.2421		0.00035	0.00783843	0.00220324	0.735207	rs7690328	18	MSMO1	0	intronic	0.382	7	2	5	0	0	0
4:166258241:A:T	rs756090	4	166258241	A	T	0.2451		0.00059	0.00738751	0.00215634	0.736545	rs7690328	18	MSMO1	0	intronic	3.645	6	4	5	0	0	0
4:166258433:C:T	rs2322292	4	166258433	C	T	0.2451		0.00059	0.00737666	0.00215466	0.736545	rs7690328	18	MSMO1	0	intronic	2.909	NA	4	5	0	0	0
4:166266500:A:T	rs7690328	4	166266500	A	T	0.264		6.3e-06	-0.00983979	0.002181	1	rs7690328	18	MSMO1	2187	intergenic	9.454	7	5	5	0	0	0
4:166266727:C:T	rs4691183	4	166266727	T	C	0.264		8.5e-06	-0.00962242	0.00216423	0.992667	rs7690328	18	MSMO1	2414	intergenic	3.953	5	5	5	0	0	0
4:166267119:A:G	rs7667236	4	166267119	A	G	0.264		6.6e-06	-0.00976104	0.00216755	1	rs7690328	18	MSMO1	2806	intergenic	8.083	5	2	15	0	0	0
4:171226154:C:T	rs11946492	4	171226154	T	C	0.02042		8.9e-06	-0.0254961	0.005745	1	rs11946492	19	RP11-789C1.1	21923	intergenic	0.95	7	7	15	0	0	0
4:182693867:C:T	rs73871707	4	182693867	C	T	0.01664		5.4e-06	-0.0361266	0.00788733	1	rs73871707	20	RP11-540E16.2	47304	intergenic	3.416	7	5	15	0	0	0
4:182709117:C:T	rs73871710	4	182709117	T	C	0.02042		9.5e-06	-0.0328958	0.00737747	1	rs73871710	20	RP11-540E16.2	32054	intergenic	2.97	7	5	15	0	0	0
4:187014000:A:C	rs73025959	4	187014000	C	A	0.05673		6.8e-06	-0.0166438	0.00366905	1	rs73025959	21	TLR3	4776	intergenic	0.329	5	5	15	0	0	0
5:20536559:C:T	rs150744905	5	20536559	C	T	0.0121		1.3e-06	-0.0354162	0.00731963	1	rs145849737	22	CDH18	0	intronic	8.779	5	7	15	0	0	0
5:20542546:C:T	rs146793722	5	20542546	T	C	0.0121		1.1e-06	-0.0362683	0.00744691	1	rs145849737	22	CDH18	0	intronic	1.184	7	14	15	0	0	0
5:20544251:C:G	rs145849737	5	20544251	G	C	0.0121		1.1e-06	-0.0363909	0.00746354	1	rs145849737	22	CDH18	0	intronic	6.367	7	9	15	0	0	0
5:20549408:A:G	rs150340920	5	20549408	G	A	0.0121		1.5e-06	-0.035913	0.00746197	1	rs145849737	22	CDH18	0	intronic	2.975	6	9	15	0	0	0
5:20552942:A:G	rs190082809	5	20552942	A	G	0.01286		1.2e-06	-0.0363831	0.00748506	0.951443	rs145849737	22	CDH18	0	intronic	2.039	7	9	15	0	0	0
5:107469179:C:T	rs547840497	5	107469179	C	T	0.01437	0.98563	2.9e-07	-0.0410076	0.00794326	0.688961	rs552690895	23	FBXL17	0	intronic	9.899	NA	5	15	0	0	0
5:107570359:A:G	rs552690895	5	107570359	A	G	0.01286	0.98714	2.5e-08	-0.0428127	0.00763643	1	rs552690895	23	FBXL17	0	intronic	4.314	NA	5	15	0	0	0
5:123415404:A:G	rs77025842	5	123415404	A	G	0.01589		8.5e-06	-0.0390848	0.00870773	1	rs77025842	24	HMGB1P29	140867	intergenic	0.729	5	5	15	0	0	0
5:141846696:A:G	rs116642997	5	141846696	A	G	0.0121		3.4e-06	-0.0411331	0.00890564	1	rs116642997	25	AC005592.2	0	ncRNA_intronic	6.276	5	4	15	0	0	0
5:166911656:C:T	rs6555752	5	166911656	C	T	0.1513		2.3e-05	-0.0109342	0.00261575	0.626793	rs6555754	26	TENM2	0	intronic	1.838	6	5	15	0	0	0
5:166913157:A:T	rs6555754	5	166913157	T	A	0.2171		9.1e-06	-0.0101724	0.00234173	1	rs6555754	26	TENM2	0	intronic	0.627	6	5	15	0	0	0
5:166915827:C:T	rs6555757	5	166915827	C	T	0.1528		3.3e-05	-0.010606	0.00259403	0.64249	rs6555754	26	TENM2	0	intronic	3.042	7	5	15	0	0	0
5:166919953:C:G	rs7448661	5	166919953	C	G	0.1536		0.00016	-0.00959015	0.00257891	0.637537	rs6555754	26	TENM2	0	intronic	0.078	7	5	15	0	0	0
5:166919965:C:G	rs6555758	5	166919965	C	G	0.1536		0.00017	-0.00952297	0.00257512	0.637537	rs6555754	26	TENM2	0	intronic	0.405	6	5	15	0	0	0
5:177953359:A:G	rs549345555	5	177953359	A	G	0.0121		8.1e-06	0.0331997	0.00754738	1	rs549345555	27	COL23A1	0	intronic	0.736	NA	5	15	0	0	0
6:151461965:C:T	rs12660147	6	151461965	T	C	0.01059		9.5e-06	-0.0322252	0.00735862	1	rs12660147	28	RP1-292B18.4	0	ncRNA_intronic	6.541	5	5	15	0	0	0
6:157913476:C:T	rs2070276	6	157913476	T	C	0.1589		7.8e-06	0.0111406	0.00252478	1	rs2070276	29	ZDHHC14	0	intronic	NA	5	4	15	0	0	0
6:162887480:A:G	rs115995783	6	162887480	G	A	0.1589		7.3e-06	-0.0122689	0.00274042	1	rs115995783	30	PARK2	0	intronic	3.939	7	5	15	0	0	0
7:21817837:C:T	rs57417302	7	21817837	C	T	0.05598		1.7e-05	-0.017778	0.00410873	0.916199	rs57111797	31	DNAH11	0	intronic	2.96	5	5	15	0	0	0
7:21818315:C:T	rs76070847	7	21818315	C	T	0.05446		2e-05	-0.017641	0.00411403	0.944276	rs57111797	31	DNAH11	0	intronic	4.479	7	5	15	0	0	0
7:21818567:C:T	rs72657378	7	21818567	C	T	0.05446		2.7e-05	-0.0173153	0.00410053	0.944276	rs57111797	31	DNAH11	0	intronic	7.462	6	5	15	0	0	0
7:21819935:C:G	rs115021208	7	21819935	C	G	0.05446		1.9e-05	-0.0177169	0.00411785	0.944276	rs57111797	31	DNAH11	0	intronic	2.428	7	5	15	0	0	0
7:21821225:A:G	rs115511853	7	21821225	G	A	0.04463		4.5e-05	-0.0182225	0.00443588	0.767646	rs57111797	31	DNAH11	0	intronic	0.568	7	5	15	0	0	0
7:21822015:C:T	rs79389131	7	21822015	C	T	0.05219		0.00015	-0.0168501	0.0044293	0.902925	rs57111797	31	DNAH11	0	intronic	2.414	6	5	15	0	0	0
7:21822483:A:G	rs146389953	7	21822483	G	A	0.04463		3e-05	-0.0186939	0.00444867	0.767646	rs57111797	31	DNAH11	0	intronic	5.386	6	5	15	0	0	0
7:21823761:A:G	rs114655487	7	21823761	G	A	0.04463		2.2e-05	-0.0190124	0.00444858	0.767646	rs57111797	31	DNAH11	0	intronic	2.332	7	5	15	0	0	0
7:21827382:A:G	rs73277728	7	21827382	G	A	0.05749		1e-05	-0.0179661	0.00405555	1	rs57111797	31	DNAH11	0	intronic	11.36	7	5	15	0	0	0
7:21828115:A:C	rs61063466	7	21828115	C	A	0.05749		1e-05	-0.0179661	0.00405555	1	rs57111797	31	DNAH11	0	intronic	0.952	7	5	15	0	0	0
7:21828336:C:T	rs57111797	7	21828336	C	T	0.05749		7.4e-06	-0.0177334	0.00393357	1	rs57111797	31	DNAH11	0	intronic	3.692	7	5	15	0	0	0
7:21833188:C:G	rs111977426	7	21833188	G	C	0.0469		1.9e-05	-0.0188375	0.0043664	0.752861	rs57111797	31	DNAH11	0	intronic	0.863	7	5	15	0	0	0
7:21833516:C:G	rs73277735	7	21833516	C	G	0.06278		5.9e-05	-0.0159884	0.00396029	0.884038	rs57111797	31	DNAH11	0	intronic	3.812	6	5	15	0	0	0
7:21834379:A:G	rs73277737	7	21834379	A	G	0.0469		1.8e-05	-0.0188286	0.00436156	0.752861	rs57111797	31	DNAH11	0	intronic	0.3	7	8	15	0	0	0
7:21836426:A:C	rs58818794	7	21836426	C	A	0.04917		0.0018	-0.0136767	0.00438565	0.739803	rs57111797	31	DNAH11	0	intronic	0.916	7	5	15	0	0	0
7:21838822:C:T	rs114532619	7	21838822	T	C	0.04841		0.0018	-0.0137	0.00437844	0.752813	rs57111797	31	DNAH11	0	intronic	4.733	6	5	15	0	0	0
7:21838977:C:T	rs114461226	7	21838977	T	C	0.04841		0.0014	-0.0138783	0.00432991	0.752813	rs57111797	31	DNAH11	0	intronic	0.251	6	5	15	0	0	0
7:21839058:C:T	rs142136868	7	21839058	T	C	0.04841		0.0018	-0.0137	0.00437844	0.752813	rs57111797	31	DNAH11	0	intronic	2.182	7	5	15	0	0	0
7:21839145:A:G	rs370051456	7	21839145	G	A	0.04841		0.0019	-0.0136337	0.00437598	0.752813	rs57111797	31	DNAH11	0	intronic	0.064	6	5	15	0	0	0
7:21839431:C:T	rs75878942	7	21839431	T	C	0.04841		0.0018	-0.0137	0.00437844	0.752813	rs57111797	31	DNAH11	0	intronic	2.527	7	5	15	0	0	0
7:21840166:C:T	rs115587464	7	21840166	T	C	0.04766		0.0028	-0.0133052	0.0044431	0.739461	rs57111797	31	DNAH11	0	intronic	9.457	7	5	15	0	0	0
7:34721273:A:G	rs77525697	7	34721273	A	G	0.06505		5.9e-06	-0.0201273	0.00445415	1	rs77525697	32	NPSR1-AS1:NPSR1	00:00:00	ncRNA_intronic	1.746	6	5	15	0	0	0
7:34739450:C:G	rs79427512	7	34739450	G	C	0.06203		2.4e-05	-0.0192003	0.00455385	0.929862	rs77525697	32	NPSR1-AS1:NPSR1	00:00:00	ncRNA_intronic	1.338	7	5	15	0	0	0
7:34755469:C:G	rs76264270	7	34755469	C	G	0.06959		0.00064	-0.0138663	0.00405996	0.891352	rs77525697	32	NPSR1-AS1:NPSR1	00:00:00	ncRNA_intronic	0.739	6	4	15	0	0	0
7:34763605:C:T	rs11773493	7	34763605	T	C	0.07035		0.00025	-0.0147791	0.00402691	0.839575	rs77525697	32	NPSR1-AS1:NPSR1	00:00:00	ncRNA_intronic	2.285	5	1	15	0	0	0
7:98984213:A:G	rs28377312	7	98984213	A	G	0.1036		5.2e-06	0.0152967	0.00334446	1	rs28377312	33	ARPC1A:ARPC1B	00:00:00	UTR3	5.611	5	4	4	0	0	0
7:98994492:C:T	rs115279860	7	98994492	T	C	0.1014		6.2e-05	0.0143098	0.00356616	0.977156	rs28377312	33	PDAP1	0	intronic	2.55	4	4	4	0	0	0
7:99008612:C:G	rs114423918	7	99008612	G	C	0.09304		0.00039	0.013111	0.00371066	0.895241	rs28377312	33	BUD31	0	intronic	5.454	7	3	4	0	0	0
7:134551474:C:T	7:134551474	7	134551474	T	C	0.4856		3.4e-06	-0.00860135	0.00187214	1	7:134551474	34	CALD1	0	intronic	13.69	5	1	15	1	0	1
7:134555102:C:T	rs2290362	7	134555102	C	T	0.3631		1.6e-05	-0.00837903	0.00196513	0.964079	rs7781307	34	CALD1	0	intronic	1.511	NA	2	5	0	0	0
7:134556318:A:G	rs7781307	7	134556318	A	G	0.3669		2.1e-06	-0.00909892	0.0019346	1	rs7781307	34	CALD1	0	intronic	2.859	6	4	5	0	0	0
7:134556338:C:T	rs1452910	7	134556338	C	T	0.3835		2.9e-05	-0.00796406	0.00192694	0.930736	rs7781307	34	CALD1	0	intronic	2.008	NA	4	5	0	0	0
7:134557982:A:C	rs73454214	7	134557982	C	A	0.2829		0.00096	-0.00697799	0.00212171	0.643231	rs7781307	34	CALD1	0	intronic	0.684	5	4	15	0	0	0
7:134595705:A:G	rs6944779	7	134595705	G	A	0.06278		2.6e-05	-0.0133379	0.00317145	0.784307	rs115958096	34	CALD1	0	intronic	4.246	4	2	15	0	0	0
7:134599841:C:T	rs115794385	7	134599841	T	C	0.06354		7.5e-06	-0.0141414	0.00315026	0.774215	rs115958096	34	CALD1	0	intronic	9.31	5	4	15	0	0	0
7:134601182:C:G	rs4585678	7	134601182	C	G	0.06278		2.7e-05	-0.0133518	0.00317442	0.784307	rs115958096	34	CALD1	0	intronic	17.57	3a	4	15	1	0	0
7:134603653:G:T	rs115958096	7	134603653	T	G	0.04992		5.7e-06	-0.0148242	0.00326762	1	rs115958096	34	CALD1	0	intronic	1.122	7	5	15	0	0	0
7:134609665:A:G	rs6950114	7	134609665	A	G	0.04387		0.00054	-0.0122887	0.00353568	0.695457	rs115958096	34	CALD1	0	intronic	1.932	6	4	5	0	0	0
7:134611000:C:G	rs74619726	7	134611000	G	C	0.04992		3.2e-05	-0.0135855	0.00325106	0.848514	rs115958096	34	CALD1	0	intronic	15.21	7	4	5	1	0	0
7:134611392:C:G	rs79947576	7	134611392	C	G	0.04387		0.0004	-0.0125042	0.00351073	0.695457	rs115958096	34	CALD1	0	intronic	0.741	5	4	5	0	0	0
7:134611932:C:G	rs75318629	7	134611932	G	C	0.04387		0.00048	-0.0124281	0.0035461	0.695457	rs115958096	34	CALD1	0	intronic	3.009	5	4	5	0	0	0
7:134615888:G:T	rs74634886	7	134615888	G	T	0.04236		0.00036	-0.0125058	0.00349209	0.693936	rs115958096	34	CALD1	0	intronic	9.621	7	4	5	0	0	0
7:134618032:C:T	rs114442219	7	134618032	T	C	0.04236		0.0004	-0.0122345	0.00344366	0.693936	rs115958096	34	CALD1	0	exonic	25.1	2b	1	4	1	0	0
7:135874069:C:T	rs112178266	7	135874069	C	T	0.02118		0.0001	-0.0314767	0.00806081	0.962765	rs112681455	35	AC009784.3	0	ncRNA_intronic	3.123	7	9	15	0	0	0
7:135914155:A:G	rs112681455	7	135914155	A	G	0.02042		7.1e-06	-0.0373827	0.0083079	1	rs112681455	35	AC009784.3	0	ncRNA_intronic	0.147	7	5	15	0	0	0
7:135954311:C:T	rs73460891	7	135954311	T	C	0.02118		0.00079	-0.0269038	0.00799229	0.889734	rs112681455	35	AC009784.3	0	ncRNA_intronic	7.683	5	9	15	0	0	0
8:2427834:A:G	8:2427834	8	2427834	G	A	0.04009		0.00011	0.0190799	0.00496762	0.793485	rs75672436	36	RP11-378A12.1	19241	intergenic	0.081	6	9	15	0	0	0
8:2432497:C:T	8:2432497	8	2432497	T	C	0.04539		5.4e-05	0.0196511	0.00489309	0.948102	rs75672436	36	RP11-378A12.1	14578	intergenic	2.837	7	9	15	0	0	0
8:2433799:C:T	8:2433799	8	2433799	T	C	0.1104		0.0001	0.0120432	0.00309962	0.747426	8:2460875	36	RP11-378A12.1	13276	intergenic	1.913	6	9	15	0	0	0
8:2434730:C:T	8:2434730	8	2434730	T	C	0.1089		6.2e-05	0.0124806	0.0031213	0.76025	8:2460875	36	RP11-378A12.1	12345	intergenic	1.017	6	9	15	0	0	0
8:2438099:C:G	8:2438099	8	2438099	G	C	0.04539		3.8e-05	0.0196178	0.0047971	0.948102	rs75672436	36	RP11-378A12.1	8976	intergenic	0.515	6	9	15	0	0	0
8:2438714:A:G	8:2438714	8	2438714	A	G	0.1301		0.0022	0.00878737	0.00287481	0.604613	8:2460875	36	RP11-378A12.1	8361	intergenic	4.18	5	1	15	0	0	0
8:2440626:C:G	8:2440626	8	2440626	G	C	0.04539		3.9e-05	0.0195989	0.00479532	0.948102	rs75672436	36	RP11-378A12.1	6449	intergenic	3.568	6	9	15	0	0	0
8:2443879:C:G	8:2443879	8	2443879	C	G	0.03933		6.7e-05	0.0194861	0.00491407	0.810583	rs75672436	36	RP11-378A12.1	3196	intergenic	0.06	6	5	15	0	0	0
8:2445739:A:G	8:2445739	8	2445739	A	G	0.03933		6.5e-05	0.0194991	0.004909	0.810583	rs75672436	36	RP11-378A12.1	1336	intergenic	2.084	6	9	15	0	0	0
8:2446520:C:T	8:2446520	8	2446520	T	C	0.04085		6.2e-05	0.0194507	0.0048871	0.844532	rs75672436	36	RP11-378A12.1	555	downstream	7.742	5	9	15	0	0	0
8:2448967:A:G	rs114188932	8	2448967	G	A	0.04992		0.00015	0.0171413	0.00453261	0.887234	rs75672436	36	RP11-378A12.1	0	ncRNA_intronic	0.586	5	7	15	0	0	0
8:2449499:G:T	8:2449499	8	2449499	T	G	0.1233		0.0027	0.00877663	0.00294024	0.647126	8:2460875	36	RP11-378A12.1	0	ncRNA_intronic	0.209	NA	7	15	0	0	0
8:2449790:C:G	8:2449790	8	2449790	C	G	0.1256		0.0025	0.00879432	0.00292933	0.614956	8:2460875	36	RP11-378A12.1	0	ncRNA_intronic	3.805	6	5	15	0	0	0
8:2450045:C:T	8:2450045	8	2450045	T	C	0.1059		2.5e-05	0.0132788	0.00315637	0.745122	8:2460875	36	RP11-378A12.1	0	ncRNA_intronic	1.722	6	5	15	0	0	0
8:2450145:A:G	8:2450145	8	2450145	A	G	0.1233		0.0025	0.00882234	0.00293805	0.60486	8:2460875	36	RP11-378A12.1	0	ncRNA_intronic	2.16	6	5	15	0	0	0
8:2450239:A:G	8:2450239	8	2450239	A	G	0.1203		0.0011	0.00964021	0.00297273	0.629494	8:2460875	36	RP11-378A12.1	0	ncRNA_intronic	1.522	7	5	15	0	0	0
8:2452051:C:T	rs185848523	8	2452051	T	C	0.05295		2.8e-05	0.0192113	0.00460536	0.836823	rs75672436	36	RP11-378A12.1	0	ncRNA_intronic	4.339	7	5	15	0	0	0
8:2453624:C:T	8:2453624	8	2453624	C	T	0.1346		0.003	0.0084646	0.0028689	0.731544	8:2460875	36	RP11-378A12.1	0	ncRNA_intronic	1.215	7	9	15	0	0	0
8:2458093:C:T	8:2458093	8	2458093	T	C	0.1203		5.4e-05	0.0124449	0.00310434	0.83026	8:2460875	36	RP11-378A12.1	0	ncRNA_intronic	1.483	7	9	15	0	0	0
8:2460875:A:T	8:2460875	8	2460875	T	A	0.1036		4.9e-06	0.0149138	0.00327867	1	8:2460875	36	RP11-378A12.1	0	ncRNA_intronic	1.172	7	2	15	0	0	0
8:2461919:A:G	8:2461919	8	2461919	G	A	0.1089		1e-05	0.014241	0.00324633	0.944442	8:2460875	36	RP11-378A12.1	0	ncRNA_exonic	1.236	5	5	15	0	0	0
8:2461960:A:G	rs116657419	8	2461960	A	G	0.04841		9e-05	0.0182525	0.00469027	0.731396	rs75672436	36	RP11-378A12.1	0	ncRNA_exonic	2.255	5	5	15	0	0	0
8:2463909:C:T	rs76997210	8	2463909	T	C	0.04766		4.1e-05	0.0190285	0.00466803	0.714786	rs75672436	36	RP11-378A12.1	0	ncRNA_intronic	1.756	6	5	15	0	0	0
8:2465332:A:G	8:2465332	8	2465332	G	A	0.05219		2.3e-05	0.0194029	0.00460382	0.81547	rs75672436	36	RP11-378A12.1	0	ncRNA_intronic	0.856	NA	7	15	0	0	0
8:2465839:C:G	8:2465839	8	2465839	C	G	0.1067		8.5e-06	0.0142421	0.00320885	0.935345	8:2460875	36	RP11-378A12.1	0	ncRNA_intronic	0.278	6	7	15	0	0	0
8:2472194:A:G	rs145016746	8	2472194	G	A	0.03782		2e-05	0.022162	0.00523176	0.811466	rs75672436	36	RP11-378A12.1	0	ncRNA_intronic	0.516	3a	5	15	0	0	0
8:2473121:C:T	rs116681540	8	2473121	C	T	0.05068		9.7e-05	0.0181516	0.00467378	0.904512	rs75672436	36	RP11-378A12.1	0	ncRNA_intronic	0.344	7	7	15	0	0	0
8:2473482:G:T	8:2473482	8	2473482	G	T	0.1263		0.00072	0.00929911	0.00275858	0.677718	8:2460875	36	RP11-378A12.1	0	ncRNA_intronic	1.923	7	5	15	0	0	0
8:2473738:G:T	rs116036408	8	2473738	T	G	0.0469		1e-05	0.0208795	0.00476079	0.982842	rs75672436	36	RP11-378A12.1	0	ncRNA_intronic	0.035	7	5	15	0	0	0
8:2474489:A:C	rs75672436	8	2474489	A	C	0.04614		7.2e-06	0.0212682	0.00477303	1	rs75672436	36	RP11-378A12.1	0	ncRNA_intronic	1.357	7	5	15	0	0	0
8:2478164:C:T	rs74736860	8	2478164	T	C	0.03631		0.016	0.0130513	0.00549122	0.647575	rs75672436	36	RP11-378A12.1	0	ncRNA_intronic	0.353	5	5	15	0	0	0
8:50849261:A:C	rs80317189	8	50849261	A	C	0.02874		9.4e-06	-0.0234315	0.00536572	0.92252	rs115466365	37	SNTG1	0	intronic	5.152	6	5	15	0	0	0
8:50877453:C:T	rs115466365	8	50877453	C	T	0.0295		4.1e-06	-0.0245271	0.00540204	1	rs115466365	37	SNTG1	0	intronic	3.561	6	5	15	0	0	0
8:50927396:C:T	rs147252714	8	50927396	T	C	0.03404		4.4e-06	-0.0237323	0.00524313	0.693747	rs115466365	37	SNTG1	0	intronic	0.409	6	5	15	0	0	0
8:95088353:C:G	rs7831012	8	95088353	G	C	0.2012		0.00017	-0.00891704	0.00237628	0.687158	rs114684581	38	KB-1184D12.1	21638	intergenic	10.9	7	5	15	0	0	0
8:95089653:A:C	rs7006922	8	95089653	A	C	0.1838		1.7e-05	-0.01042	0.00243487	0.781367	rs114684581	38	KB-1184D12.1	20338	intergenic	0.922	6	5	15	0	0	0
8:95092061:A:C	rs7013153	8	95092061	C	A	0.1649		1.2e-06	-0.0127081	0.00260953	0.937324	rs114684581	38	KB-1184D12.1	17930	intergenic	2.763	2b	2	15	0	0	0
8:95093235:A:C	rs2978143	8	95093235	A	C	0.2322		0.00058	-0.00759654	0.00221188	0.605607	rs114684581	38	KB-1184D12.1	16756	intergenic	3.167	NA	5	15	0	0	0
8:95096074:C:T	rs116136580	8	95096074	C	T	0.1679		5.7e-06	-0.011569	0.00255286	0.97193	rs114684581	38	KB-1184D12.1	13917	intergenic	3.713	5	5	15	0	0	0
8:95096603:A:G	rs6997440	8	95096603	G	A	0.2284		0.00084	0.00733394	0.00220778	0.646458	rs114684581	38	KB-1184D12.1	13388	intergenic	2.056	7	5	15	0	0	0
8:95100302:C:T	rs114684581	8	95100302	C	T	0.1657		1.1e-06	-0.0126612	0.00259928	1	rs114684581	38	KB-1184D12.1	9689	intergenic	4.477	6	5	15	0	0	0
8:95103497:C:T	rs2446849	8	95103497	T	C	0.2284		0.00088	0.00730481	0.00220744	0.646458	rs114684581	38	KB-1184D12.1	6494	intergenic	3.069	NA	5	15	0	0	0
8:95110744:A:G	rs7006531	8	95110744	G	A	0.1838		2.6e-06	-0.0115116	0.0024615	0.86615	rs114684581	38	KB-1184D12.1	0	ncRNA_intronic	2.931	7	5	15	0	0	0
8:95111326:C:T	rs2446833	8	95111326	C	T	0.2186		0.00052	0.00772485	0.00224102	0.681724	rs114684581	38	KB-1184D12.1	0	ncRNA_intronic	1.078	NA	5	15	0	0	0
8:129492156:A:G	rs116216559	8	129492156	A	G	0.02648	0.97352	7.7e-07	-0.0259214	0.00524452	1	rs116216559	39	RP11-89M16.1	0	ncRNA_intronic	1.887	7	5	15	0	0	0
8:138075269:A:G	rs62523731	8	138075269	G	A	0.1225		0.00052	-0.0103213	0.00295882	0.661306	rs11781274	40	RNU6-144P	42325	intergenic	4.277	6	15	15	0	0	0
8:138080419:C:T	rs9644430	8	138080419	T	C	0.1233		0.0025	-0.00877253	0.00288882	0.648288	rs11781274	40	RNU6-144P	37175	intergenic	1.978	7	9	15	0	0	0
8:138084871:C:G	rs7819274	8	138084871	G	C	0.1248		0.0027	-0.00868542	0.00287844	0.644084	rs11781274	40	RNU6-144P	32723	intergenic	14.35	7	9	15	0	0	0
8:138092782:A:C	rs28731472	8	138092782	C	A	0.09002	0.90998	3.9e-07	-0.0161721	0.00319047	0.88373	rs11781274	40	RNU6-144P	24812	intergenic	1.957	5	9	15	0	0	0
8:138097368:A:G	rs11781274	8	138097368	A	G	0.08169	0.91831	1.8e-07	-0.0173334	0.00332268	1	rs11781274	40	RNU6-144P	20226	intergenic	1.506	7	9	15	0	0	0
9:2183330:C:T	rs1324201	9	2183330	C	T	0.2557	0.7443	8.6e-07	-0.0103937	0.00210401	1	rs1324201	41	SMARCA2	0	intronic	4.016	NA	4	5	0	0	0
9:2183434:A:G	rs1324200	9	2183434	G	A	0.3207		3.1e-05	-0.00841752	0.00198972	0.667294	rs1324201	41	SMARCA2	0	intronic	8.64	NA	4	5	0	0	0
9:2183438:C:G	rs1324199	9	2183438	G	C	0.3207		3.5e-05	-0.00837276	0.00199197	0.667294	rs1324201	41	SMARCA2	0	intronic	8.034	6	4	5	0	0	0
9:2183663:C:T	rs1324198	9	2183663	T	C	0.32		0.00014	-0.0076311	0.00197654	0.643376	rs1324201	41	SMARCA2	0	intronic	9.733	NA	4	4	0	0	0
9:29630500:A:T	rs368346035	9	29630500	A	T	0.01589		2.4e-05	-0.0349419	0.00833104	0.764619	9:29676822	42	RP11-48L13.1	5983	intergenic	8.041	7	5	15	0	0	0
9:29631187:A:G	rs369645701	9	29631187	A	G	0.01589		1.9e-05	-0.0351619	0.00828647	0.764619	9:29676822	42	RP11-48L13.1	5296	intergenic	0.007	7	5	15	0	0	0
9:29635844:A:G	rs369030584	9	29635844	G	A	0.01589		1.5e-05	-0.035895	0.00834212	0.764619	9:29676822	42	RP11-48L13.1	639	upstream	1.45	7	9	15	0	0	0
9:29650642:C:T	rs115798656	9	29650642	T	C	0.01437		0.00014	-0.0320134	0.00848322	0.753777	9:29676822	42	RP11-48L13.1	13790	intergenic	0.716	7	9	15	0	0	0
9:29657794:A:T	rs59518950	9	29657794	T	A	0.01891		2e-05	-0.0330601	0.00781882	0.79376	9:29676822	42	RP11-48L13.1	20942	intergenic	3.889	6	5	15	0	0	0
9:29665934:A:G	rs114718251	9	29665934	G	A	0.01513		1.2e-05	-0.0341564	0.00785917	1	9:29676822	42	RP11-48L13.1	29082	intergenic	2.524	7	5	15	0	0	0
9:29676822:C:T	9:29676822	9	29676822	C	T	0.01513		2.7e-06	-0.0388438	0.00835307	1	9:29676822	42	RP11-48L13.1	39970	intergenic	6.489	6	15	15	0	0	0
9:29699583:A:T	rs192593364	9	29699583	A	T	0.01513		3e-06	-0.0382926	0.00827168	1	9:29676822	42	RP11-48L13.1	62731	intergenic	4.467	6	15	15	0	0	0
9:29708484:A:G	rs191157261	9	29708484	A	G	0.01513		3e-06	-0.0382402	0.00826279	1	9:29676822	42	RP11-48L13.1	71632	intergenic	15.11	7	9	15	0	0	0
9:29729992:A:G	rs548307286	9	29729992	G	A	0.01286		4.6e-06	-0.037518	0.00826248	0.84604	9:29676822	42	RP11-48L13.1	93140	intergenic	NA	NA	7	15	0	0	0
9:29742049:A:C	rs545630922	9	29742049	A	C	0.01059		5.8e-06	-0.0344563	0.00764035	1	rs545630922	42	RP11-460C6.1	82690	intergenic	2.66	NA	9	15	0	0	0
9:29742902:C:T	rs181469486	9	29742902	C	T	0.01059		6.2e-06	-0.0342692	0.00762203	1	rs545630922	42	RP11-460C6.1	81837	intergenic	0.383	7	9	15	0	0	0
10:21512876:A:G	rs143777376	10	21512876	A	G	0.03631		9.6e-06	-0.0252591	0.00566573	1	rs143777376	43	RP11-565H13.3	5667	intergenic	1.096	7	5	15	0	0	0
10:66576638:C:G	rs74139383	10	66576638	G	C	0.09682		6.7e-06	0.0141756	0.00313777	1	rs74139383	44	ANXA2P3	8690	intergenic	8.22	7	14	15	0	0	0
10:108759228:A:T	rs11193156	10	108759228	A	T	0.1339	0.8661	2.1e-07	-0.0161295	0.00308488	1	rs11193156	45	SORCS1	0	intronic	19.34	3a	5	15	1	0	1
10:126714166:C:T	rs10444192	10	126714166	T	C	0.09985	0.90015	7.5e-07	-0.0166985	0.0033435	1	rs10444192	46	CTBP2	0	intronic	6.356	4	2	5	0	0	0
10:126715629:C:T	rs3781409	10	126715629	T	C	0.09985	0.90015	6.6e-07	-0.0167234	0.00333359	1	rs3781409	46	CTBP2	0	exonic	27	NA	4	4	0	1	0
10:126733319:A:G	rs4962724	10	126733319	G	A	0.1982		2.7e-06	-0.0112825	0.00239278	1	rs4962724	46	CTBP2	0	intronic	1.383	6	2	5	0	0	0
10:126745515:C:T	rs7916377	10	126745515	C	T	0.08775		7.2e-06	0.0155377	0.00350549	1	rs7916377	46	CTBP2	0	intronic	2.38	5	2	7	0	0	0
11:29098622:A:G	rs78182109	11	29098622	A	G	0.07035		5.8e-06	-0.0185467	0.00407621	0.745086	rs7949247	47	RP11-115J23.1	13253	intergenic	2.552	5	9	15	0	0	0
11:29102306:C:T	rs76435260	11	29102306	T	C	0.07413		1.7e-05	-0.0179044	0.0041293	0.705701	rs7949247	47	RP11-115J23.1	16937	intergenic	9.838	6	9	15	0	0	0
11:29110677:C:T	11:29110677	11	29110677	T	C	0.06732		3.7e-05	-0.0176262	0.0042343	0.762284	rs7949247	47	RP11-115J23.1	25308	intergenic	1.235	5	5	15	0	0	0
11:29115687:G:T	rs12281926	11	29115687	T	G	0.06959		4.3e-05	-0.0170952	0.00414065	0.755981	rs7949247	47	RP11-115J23.1	30318	intergenic	0.012	7	2	15	0	0	0
11:29121072:A:G	rs7944413	11	29121072	A	G	0.07186		3.2e-05	-0.0172183	0.00410281	0.748675	rs7949247	47	RP11-115J23.1	35703	intergenic	3.8	6	15	15	0	0	0
11:29148663:C:T	rs12294671	11	29148663	T	C	0.0711		0.00035	-0.0147727	0.00408026	0.738575	rs7949247	47	RP11-466I1.1	32839	intergenic	0.07	7	5	15	0	0	0
11:29178549:C:T	rs12275126	11	29178549	C	T	0.06732		6e-05	-0.0171519	0.00425088	0.762284	rs7949247	47	RP11-466I1.1	2953	intergenic	2.022	7	5	15	0	0	0
11:29192194:C:T	rs7938594	11	29192194	T	C	0.06505		0.00013	-0.0166267	0.00430208	0.811635	rs7949247	47	RP11-466I1.1	0	ncRNA_intronic	3.442	6	5	15	0	0	0
11:29192661:A:G	rs7939092	11	29192661	G	A	0.06808		3.1e-05	-0.0173648	0.00412704	0.852718	rs7949247	47	RP11-466I1.1	0	ncRNA_intronic	4.11	6	5	15	0	0	0
11:29193421:C:T	rs74683507	11	29193421	C	T	0.06884		1.5e-05	-0.0184373	0.00423336	0.925991	rs7949247	47	RP11-466I1.1	0	ncRNA_intronic	2.429	5	5	15	0	0	0
11:29201592:C:T	rs7949247	11	29201592	C	T	0.07262		5.2e-06	-0.0179688	0.00390954	1	rs7949247	47	RP11-466I1.1	0	ncRNA_intronic	10.41	5	5	15	0	0	0
11:29223459:A:T	rs12272918	11	29223459	T	A	0.08094		6.9e-05	-0.0150197	0.00375968	0.893884	rs7949247	47	RP11-466I1.1	0	ncRNA_intronic	3.946	7	7	15	0	0	0
11:29225074:C:T	rs76912122	11	29225074	T	C	0.07413		0.00015	-0.015517	0.00408757	0.81559	rs7949247	47	RP11-466I1.1	0	ncRNA_intronic	2.985	6	9	15	0	0	0
11:29231228:C:T	rs7948742	11	29231228	C	T	0.09304		6.3e-05	-0.014661	0.00365163	0.77385	rs7949247	47	RP11-466I1.1	0	ncRNA_intronic	1.691	7	15	15	0	0	0
11:29240007:A:C	rs58760238	11	29240007	C	A	0.09077		0.0001	-0.0142504	0.00365556	0.791322	rs7949247	47	RP11-466I1.1	0	ncRNA_intronic	2.286	6	9	15	0	0	0
11:29240683:A:G	rs12275465	11	29240683	A	G	0.08926		0.00011	-0.0142061	0.00365667	0.770681	rs7949247	47	RP11-466I1.1	0	ncRNA_intronic	11.79	7	9	15	0	0	0
11:29241377:C:T	rs12277153	11	29241377	T	C	0.08926		0.00011	-0.0142061	0.00365667	0.770681	rs7949247	47	RP11-466I1.1	0	ncRNA_intronic	9.659	5	9	15	0	0	0
11:29241520:C:T	rs113375959	11	29241520	T	C	0.08926		0.00011	-0.0142061	0.00365667	0.770681	rs7949247	47	RP11-466I1.1	0	ncRNA_intronic	7.291	7	9	15	0	0	0
11:29242604:A:C	rs11500214	11	29242604	A	C	0.08926		0.00011	-0.0142061	0.00365667	0.770681	rs7949247	47	RP11-466I1.1	0	ncRNA_intronic	9.859	7	9	15	0	0	0
11:29242930:A:C	rs113457878	11	29242930	C	A	0.09077		0.0001	-0.014231	0.00365491	0.791322	rs7949247	47	RP11-466I1.1	0	ncRNA_intronic	0.717	7	9	15	0	0	0
11:29244997:C:T	rs116633117	11	29244997	T	C	0.09077		9.7e-05	-0.0143111	0.00366165	0.791322	rs7949247	47	RP11-466I1.1	0	ncRNA_intronic	0.231	7	9	15	0	0	0
11:29247951:A:G	rs74402360	11	29247951	G	A	0.09077		0.00012	-0.014128	0.00365376	0.791322	rs7949247	47	RP11-466I1.1	0	ncRNA_intronic	2.461	7	9	15	0	0	0
11:29249051:A:G	rs79702124	11	29249051	G	A	0.07413		0.00031	-0.0146805	0.00407456	0.81559	rs7949247	47	RP11-466I1.1	0	ncRNA_intronic	3.2	5	7	15	0	0	0
11:29249292:A:G	rs78642379	11	29249292	A	G	0.09077		0.00012	-0.014128	0.00365376	0.791322	rs7949247	47	RP11-466I1.1	0	ncRNA_intronic	4.6	5	2	15	0	0	0
11:29252567:C:T	rs111389721	11	29252567	T	C	0.08926		0.00011	-0.0142043	0.00365787	0.770681	rs7949247	47	RP11-466I1.1	0	ncRNA_intronic	0.448	6	14	15	0	0	0
11:29253630:C:G	rs7130684	11	29253630	C	G	0.09077		0.0001	-0.0142458	0.00365557	0.791322	rs7949247	47	RP11-466I1.1	0	ncRNA_intronic	2.504	5	7	15	0	0	0
11:29261157:C:T	rs11030637	11	29261157	T	C	0.09985		0.00012	-0.0129636	0.00337897	0.663322	rs7949247	47	RP11-466I1.1	0	ncRNA_intronic	6.658	7	14	15	0	0	0
11:29263362:A:T	rs12278980	11	29263362	A	T	0.09002		0.00083	-0.0124928	0.00371546	0.78098	rs7949247	47	RP11-466I1.1	0	ncRNA_intronic	8.259	7	9	15	0	0	0
11:29263671:C:T	rs12279143	11	29263671	C	T	0.08623		0.00046	-0.0132167	0.00375236	0.817838	rs7949247	47	RP11-466I1.1	0	ncRNA_intronic	2.222	7	9	15	0	0	0
11:29266299:C:T	rs75040738	11	29266299	C	T	0.09002		0.0011	-0.0122116	0.00371942	0.78098	rs7949247	47	RP11-466I1.1	0	ncRNA_intronic	16.44	7	5	15	1	0	0
11:29266970:C:G	rs77620037	11	29266970	G	C	0.0885		0.0014	-0.0119666	0.00372419	0.757227	rs7949247	47	RP11-466I1.1	0	ncRNA_intronic	1.488	7	7	15	0	0	0
11:29267790:C:T	rs111432811	11	29267790	C	T	0.09909		0.00033	-0.0121309	0.00338721	0.664458	rs7949247	47	RP11-466I1.1	0	ncRNA_intronic	1.978	7	14	15	0	0	0
11:29267800:A:G	rs75039402	11	29267800	G	A	0.09909		0.00026	-0.0122813	0.00337765	0.664458	rs7949247	47	RP11-466I1.1	0	ncRNA_intronic	0.132	6	14	15	0	0	0
11:29269602:A:T	rs12286554	11	29269602	T	A	0.09682		0.0002	-0.0125501	0.00338851	0.650578	rs7949247	47	RP11-466I1.1	0	ncRNA_intronic	0.165	6	9	15	0	0	0
11:29271177:G:T	rs9971525	11	29271177	G	T	0.08775		0.0005	-0.0130242	0.00371197	0.764414	rs7949247	47	RP11-466I1.1	0	ncRNA_intronic	4.212	6	15	15	0	0	0
11:29273570:A:G	rs12280984	11	29273570	A	G	0.08245		0.00042	-0.0135119	0.00380814	0.781414	rs7949247	47	RP11-466I1.1	0	ncRNA_intronic	1.596	4	5	15	0	0	0
11:29276448:A:G	rs75517821	11	29276448	A	G	0.08396		0.0004	-0.0135554	0.0038054	0.802132	rs7949247	47	RP11-466I1.1	0	ncRNA_intronic	1.514	7	5	15	0	0	0
11:29284197:C:T	rs12291295	11	29284197	T	C	0.08321		0.00087	-0.0126863	0.00378687	0.773661	rs7949247	47	RP11-466I1.1	0	ncRNA_intronic	2.021	6	5	15	0	0	0
11:29285912:C:T	rs12274153	11	29285912	C	T	0.0885		0.0015	-0.0120537	0.00375965	0.757227	rs7949247	47	RP11-466I1.1	0	ncRNA_intronic	10.98	4	5	15	0	0	0
11:29287020:C:T	11:29287020	11	29287020	C	T	0.0885		0.0013	-0.0121781	0.00376573	0.757227	rs7949247	47	RP11-466I1.1	0	ncRNA_intronic	1.531	5	5	15	0	0	0
11:29287448:A:G	rs74596215	11	29287448	G	A	0.0885		0.0013	-0.0121781	0.00376573	0.757227	rs7949247	47	RP11-466I1.1	0	ncRNA_intronic	5.216	3a	5	15	0	0	0
11:29287579:A:G	rs12273980	11	29287579	G	A	0.09909		0.00043	-0.0119703	0.00341227	0.664458	rs7949247	47	RP11-466I1.1	0	ncRNA_intronic	15.71	2b	5	15	1	0	1
11:29321203:A:G	rs16918964	11	29321203	A	G	0.0764		0.0027	-0.0118804	0.00393924	0.611028	rs7949247	47	AC110056.1	22850	intergenic	3.561	5	5	15	0	0	0
11:29326402:C:T	rs111869110	11	29326402	C	T	0.0764		0.0028	-0.0118466	0.00394361	0.611028	rs7949247	47	AC110056.1	28049	intergenic	2.22	6	5	15	0	0	0
11:113266679:C:T	rs34863235	11	113266679	T	C	0.02042		1.2e-06	-0.0369709	0.00765091	0.893952	rs11214599	48	ANKK1	0	intronic	3.953	5	4	15	0	0	0
11:113271360:C:T	rs11214599	11	113271360	T	C	0.01967	0.98033	5.4e-07	-0.0386823	0.00777695	1	rs11214599	48	ANKK1	219	downstream	5.644	5	4	15	0	0	0
11:113274771:C:T	rs2511520	11	113274771	T	C	0.02042	0.97958	5.9e-07	-0.0391066	0.00787735	0.96421	rs11214599	48	RP11-159N11.3	1271	intergenic	3.032	5	5	15	0	0	0
11:113279921:C:T	rs2242591	11	113279921	T	C	0.01967	0.98033	8.1e-07	-0.0388132	0.00793797	1	rs11214599	48	RP11-159N11.3	0	ncRNA_intronic	4.055	NA	5	15	0	0	0
11:113280724:A:C	rs6278	11	113280724	A	C	0.02042	0.97958	8.6e-07	-0.0384877	0.00789059	0.96421	rs11214599	48	RP11-159N11.3:DRD2	00:00:00	ncRNA_intronic	3.553	5	5	15	0	0	0
11:113282090:A:G	rs1124491	11	113282090	A	G	0.01967	0.98033	6.4e-07	-0.0387425	0.00784386	1	rs11214599	48	RP11-159N11.3:DRD2	00:00:00	ncRNA_intronic	4.994	5	5	15	0	0	0
11:113289066:C:T	rs2075654	11	113289066	T	C	0.01815		2.5e-06	-0.0404132	0.00858302	0.853649	rs11214599	48	DRD2	0	intronic	2.287	NA	5	15	0	0	0
11:113305203:G:T	rs7350522	11	113305203	T	G	0.02194		4e-05	-0.0247266	0.00609034	0.651578	rs11214599	48	DRD2	0	intronic	1.726	7	5	15	0	0	0
11:113323831:C:G	rs72999670	11	113323831	G	C	0.02723		1.3e-05	-0.0316127	0.00731922	0.827833	rs4938022	48	DRD2	0	intronic	12.04	7	5	15	0	0	0
11:113332956:A:T	rs4322431	11	113332956	A	T	0.03328		2.1e-05	-0.0291444	0.00688937	0.975691	rs4938022	48	DRD2	0	intronic	4.051	5	5	14	0	0	0
11:113334904:C:G	rs72999677	11	113334904	C	G	0.03253		4.4e-05	-0.0272523	0.0067231	1	rs4938022	48	DRD2	0	intronic	0.601	5	5	14	0	0	0
11:113335497:C:T	rs11214614	11	113335497	T	C	0.03253		2.6e-05	-0.0287376	0.00687438	1	rs4938022	48	DRD2	0	intronic	0.828	5	5	14	0	0	0
11:113349371:A:G	rs56118276	11	113349371	A	G	0.03253		2.6e-05	-0.0281777	0.00674099	1	rs4938022	48	DRD2	2957	intergenic	3.662	5	5	14	0	0	0
11:113356050:A:G	rs72999691	11	113356050	A	G	0.03555		8e-05	-0.0261299	0.006672	0.908972	rs4938022	48	DRD2	9636	intergenic	1.136	7	5	14	0	0	0
11:113361651:A:G	rs4421776	11	113361651	A	G	0.03555		7e-05	-0.0263236	0.00667125	0.908972	rs4938022	48	DRD2	15237	intergenic	0.863	5	5	15	0	0	0
11:113363523:C:T	rs11214622	11	113363523	C	T	0.03933		0.0004	-0.0212641	0.00600251	0.814881	rs4938022	48	DRD2	17109	intergenic	0.804	6	5	15	0	0	0
11:113364271:C:T	rs4611239	11	113364271	T	C	0.03555		4.4e-05	-0.0270084	0.00665983	0.908972	rs4938022	48	DRD2	17857	intergenic	3.071	5	5	15	0	0	0
11:113367332:C:T	rs11214626	11	113367332	T	C	0.03555		4e-05	-0.0271666	0.00665805	0.908972	rs4938022	48	DRD2	20918	intergenic	4.86	6	7	15	0	0	0
11:113367685:A:G	rs4938022	11	113367685	A	G	0.03253		6.7e-06	-0.0291655	0.00650827	1	rs4938022	48	DRD2	21271	intergenic	3.852	6	7	15	0	0	0
11:113378320:C:G	rs11214630	11	113378320	G	C	0.03026		2.9e-05	-0.0278767	0.00671372	0.925739	rs4938022	48	DRD2	31906	intergenic	1.633	5	5	15	0	0	0
11:113378414:C:T	rs73001610	11	113378414	C	T	0.03328		0.00013	-0.0206328	0.0053693	0.83529	rs4938022	48	DRD2	32000	intergenic	8.471	7	5	15	0	0	0
11:113378566:A:G	rs4938024	11	113378566	A	G	0.03631		0.00015	-0.0203999	0.00535828	0.727243	rs4938022	48	DRD2	32152	intergenic	4.166	6	5	15	0	0	0
11:113380818:A:C	rs12361003	11	113380818	A	C	0.03328		0.00012	-0.0207175	0.00537196	0.83529	rs4938022	48	DRD2	34404	intergenic	3.36	7	7	15	0	0	0
11:113383282:C:T	rs4938025	11	113383282	C	T	0.03404		0.00012	-0.0209857	0.00543262	0.815191	rs4938022	48	DRD2	36868	intergenic	0.961	5	5	15	0	0	0
11:113384909:C:G	rs1984739	11	113384909	G	C	0.03631		4.1e-05	-0.0225538	0.0054697	0.759917	rs4938022	48	DRD2	38495	intergenic	1.953	7	5	15	0	0	0
11:113386619:C:T	rs12361261	11	113386619	T	C	0.03555		4.1e-05	-0.0225488	0.00547011	0.777558	rs4938022	48	DRD2	40205	intergenic	2.145	5	5	15	0	0	0
11:113387644:C:T	rs4466875	11	113387644	T	C	0.03555		4.1e-05	-0.0225488	0.00547011	0.777558	rs4938022	48	DRD2	41230	intergenic	1.605	6	5	15	0	0	0
11:113387809:A:G	rs7131411	11	113387809	G	A	0.03631		4e-05	-0.0225679	0.00547022	0.759917	rs4938022	48	DRD2	41395	intergenic	6.911	7	5	15	0	0	0
11:113395015:C:T	rs142732944	11	113395015	T	C	0.03177		0.0035	-0.0191885	0.00662699	0.666059	rs4938022	48	DRD2	48601	intergenic	0.624	7	5	15	0	0	0
12:40725281:A:G	rs116447010	12	40725281	G	A	0.03026		7.6e-06	0.0273667	0.00608591	1	rs116447010	49	LRRK2	0	intronic	4.905	7	4	15	0	0	0
12:59203252:C:G	rs74098387	12	59203252	G	C	0.1331		3.4e-06	-0.013052	0.00279493	1	rs74098387	50	RP11-362K2.2	0	intronic	1.984	NA	5	15	0	0	0
12:59203557:C:G	rs74098388	12	59203557	G	C	0.1331		3.2e-06	-0.0130838	0.00279341	1	rs74098388	50	RP11-362K2.2	0	intronic	0.779	7	5	15	0	0	0
12:59204313:A:G	rs60233759	12	59204313	A	G	0.1331		3.2e-06	-0.0130835	0.00279536	1	rs60233759	50	RP11-362K2.2	0	intronic	2.049	7	5	15	0	0	0
12:59204911:A:T	rs74098390	12	59204911	A	T	0.1331		1.9e-06	-0.0134068	0.00280307	1	rs74098390	50	RP11-362K2.2	0	intronic	3.23	7	5	15	0	0	0
12:59260195:A:T	rs77118648	12	59260195	T	A	0.1097		6.4e-06	-0.0133633	0.00296925	1	rs77118648	51	LRIG3	5735	intergenic	1.386	5	4	15	0	0	0
12:59271083:A:G	12:59271083	12	59271083	A	G	0.09531		5.5e-06	-0.0138526	0.00305137	1	12:59271083	51	LRIG3	0	intronic	5.447	4	4	4	0	0	0
12:63524453:A:G	rs7304848	12	63524453	G	A	0.06808		3.7e-06	-0.0195843	0.00418061	1	rs7304848	52	AVPR1A	14560	intergenic	1.808	6	14	15	0	0	0
12:91969367:C:T	rs7960975	12	91969367	C	T	0.2753		9.7e-06	0.00928159	0.00211345	1	rs7960975	53	RP11-1041F24.1	104540	intergenic	0.367	6	1	15	0	0	0
12:91972172:C:T	rs12298388	12	91972172	T	C	0.2753		7.6e-06	0.00938347	0.00211214	1	rs12298388	53	RP11-1041F24.1	101735	intergenic	3.272	7	1	15	0	0	0
12:91995502:A:T	rs4534653	12	91995502	T	A	0.4682		6.7e-06	-0.00855704	0.00189924	1	rs4534653	53	RP11-1041F24.1	78405	intergenic	0.928	6	5	15	0	0	0
13:38101807:C:T	rs17055963	13	38101807	C	T	0.04917		3.4e-05	-0.0165707	0.00399662	0.713174	rs17055969	54	POSTN	34912	intergenic	1.944	7	7	15	0	0	0
13:38102337:C:G	rs71439728	13	38102337	C	G	0.04917		1.6e-05	-0.0178404	0.00412437	0.713174	rs17055969	54	POSTN	34382	intergenic	0.353	7	5	15	0	0	0
13:38102450:A:G	rs17055969	13	38102450	G	A	0.06808		6.7e-06	-0.0160544	0.00357023	1	rs17055969	54	POSTN	34269	intergenic	2.616	6	5	15	0	0	0
13:38102990:C:T	rs7334289	13	38102990	T	C	0.0764		3.2e-05	-0.0144541	0.00346207	0.703531	rs17055969	54	POSTN	33729	intergenic	0.802	7	5	15	0	0	0
13:38103577:C:T	rs2025245	13	38103577	T	C	0.06354		1.7e-05	-0.0157619	0.00367362	0.88239	rs17055969	54	POSTN	33142	intergenic	2.025	5	5	15	0	0	0
13:38103680:C:T	rs2025244	13	38103680	T	C	0.06203		2.7e-05	-0.0154063	0.00367802	0.90578	rs17055969	54	POSTN	33039	intergenic	0.953	NA	5	15	0	0	0
13:38108472:C:T	rs9315500	13	38108472	C	T	0.04917		3.2e-05	-0.0166391	0.00399579	0.713174	rs17055969	54	POSTN	28247	intergenic	2.116	2a	1	15	0	0	0
13:72958253:A:G	rs73525753	13	72958253	A	G	0.0348		5.9e-06	-0.0255715	0.00556233	1	rs73525753	55	SNORD37	69786	intergenic	13.32	6	2	15	0	0	1
13:72959098:A:G	rs73525754	13	72959098	G	A	0.0348		5.9e-06	-0.0255715	0.00556233	1	rs73525753	55	SNORD37	68941	intergenic	10.2	3a	2	15	0	0	0
13:94826620:A:G	rs9589924	13	94826620	A	G	0.06657		1.2e-06	-0.0185289	0.00383753	1	rs9589924	56	GPC6:GPC6-AS1	00:00:00	ncRNA_intronic	16.89	7	5	15	1	0	0
13:101442751:A:C	rs115575545	13	101442751	A	C	0.02648		1.8e-06	-0.0329989	0.00694124	1	rs115575545	57	NALCN-AS1	0	ncRNA_intronic	4.633	5	5	15	0	0	0
13:109393002:C:T	rs9587663	13	109393002	C	T	0.05522		0.00021	-0.0222873	0.00593712	0.833912	rs9587691	58	MYO16	0	intronic	1.489	7	9	15	0	0	0
13:109410057:C:T	rs9587671	13	109410057	C	T	0.05068		0.00014	-0.0234173	0.0060657	0.876888	rs9587691	58	MYO16	0	intronic	3.131	6	5	15	0	0	0
13:109457505:C:G	rs9587691	13	109457505	G	C	0.04614		5.3e-06	-0.0267179	0.00579458	1	rs9587691	58	MYO16	0	intronic	1.033	7	2	15	0	0	0
13:109458546:A:T	rs9583294	13	109458546	A	T	0.03707		6.8e-06	-0.0282214	0.0062192	0.801554	rs9587691	58	MYO16	0	intronic	5.911	6	5	15	0	0	0
15:53732335:C:G	rs143369870	15	53732335	G	C	0.02572		7.5e-06	-0.0256721	0.00575185	1	rs143369870	59	WDR72	73602	intergenic	2.835	7	5	15	0	0	0
15:58697834:C:G	rs12440032	15	58697834	G	C	0.07564		0.00029	-0.0116122	0.00318238	0.789225	rs11856159	60	ALDH1A2	0	intronic	0.036	6	5	15	0	0	0
15:58698357:A:G	rs12440217	15	58698357	A	G	0.07564		0.00033	-0.011704	0.00324425	0.789267	rs11856159	60	ALDH1A2	0	intronic	0.772	7	5	15	0	0	0
15:58699010:C:T	rs11856159	15	58699010	T	C	0.09682		4.9e-06	-0.0132076	0.00288424	1	rs11856159	60	ALDH1A2	0	intronic	3.573	5	5	15	0	0	0
15:58700311:C:T	rs17240869	15	58700311	C	T	0.08245		2.7e-05	-0.0124781	0.00297598	0.839309	rs11856159	60	ALDH1A2	0	intronic	9.746	7	5	15	0	0	0
15:58701551:A:G	rs17240876	15	58701551	G	A	0.06278		0.0029	-0.0102328	0.00341272	0.62439	rs11856159	60	ALDH1A2	0	intronic	1.292	6	5	15	0	0	0
15:58701931:A:G	rs150364420	15	58701931	G	A	0.08396		0.00012	-0.0115969	0.00301813	0.854322	rs11856159	60	ALDH1A2	0	intronic	0.005	7	5	15	0	0	0
15:58702864:C:T	rs17821310	15	58702864	C	T	0.08548		0.00026	-0.0108936	0.00298171	0.792613	rs11856159	60	ALDH1A2:LIPC	00:00:00	UTR5	3.865	2b	1	15	0	0	0
15:58703100:C:T	rs17821322	15	58703100	C	T	0.06278		0.0022	-0.0104151	0.00337522	0.62439	rs11856159	60	ALDH1A2:LIPC	00:00:00	intronic	4.021	5	1	15	0	0	0
15:58709181:C:T	rs60315394	15	58709181	T	C	0.06354		0.0021	-0.0104793	0.00340086	0.61545	rs11856159	60	ALDH1A2:LIPC	00:00:00	intronic	0.36	7	5	15	0	0	0
15:58709750:A:G	rs55696635	15	58709750	A	G	0.06354		0.0023	-0.0103593	0.00339642	0.61545	rs11856159	60	ALDH1A2:LIPC	00:00:00	intronic	2.316	6	5	15	0	0	0
15:58712817:C:G	rs11854624	15	58712817	G	C	0.06278		0.0052	-0.0094426	0.00337772	0.608697	rs11856159	60	ALDH1A2:LIPC	00:00:00	intronic	6.051	3a	5	15	0	0	0
15:58712945:A:C	rs11854656	15	58712945	C	A	0.09455		0.0011	-0.00908339	0.00280227	0.707749	rs11856159	60	ALDH1A2:LIPC	00:00:00	intronic	0.627	4	5	15	0	0	0
15:60707985:C:T	rs114637454	15	60707985	T	C	0.08018		6e-06	-0.0148782	0.00335955	1	rs78087538	61	NARG2	3822	intergenic	NA	7	5	5	0	0	0
15:60708370:A:G	rs115056095	15	60708370	A	G	0.06959		0.00038	-0.012008	0.00346876	0.790258	rs78087538	61	NARG2	3437	intergenic	1.881	7	5	5	0	0	0
15:60711342:C:T	rs150404976	15	60711342	T	C	0.05749		0.048	-0.00796148	0.00419185	0.702585	rs78087538	61	NARG2	465	downstream	2.892	7	5	5	0	0	0
15:60721828:G:T	rs114373918	15	60721828	T	G	0.06505		0.0014	-0.011098	0.00357753	0.792305	rs78087538	61	NARG2	0	intronic	0.117	6	4	5	0	0	0
15:60723936:C:T	rs78087538	15	60723936	C	T	0.08018		4e-06	-0.0150518	0.0033321	1	rs78087538	61	NARG2	0	intronic	3.734	6	4	5	0	0	0
15:60725297:A:T	rs184299319	15	60725297	A	T	0.06732		0.0003	-0.012187	0.00346891	0.800554	rs78087538	61	NARG2	0	intronic	7.376	6	1	5	0	0	0
15:60727234:A:G	rs150368992	15	60727234	A	G	0.06657		8e-05	-0.013495	0.00350723	0.810605	rs78087538	61	NARG2	0	intronic	2.982	6	4	5	0	0	0
15:60731336:C:T	rs78977531	15	60731336	C	T	0.08169		5.1e-06	-0.0148123	0.00331798	0.981294	rs78087538	61	NARG2	0	intronic	4.114	5	4	5	0	0	0
15:60747716:A:C	rs76446668	15	60747716	C	A	0.08018		4.6e-06	-0.0149912	0.0033427	1	rs78087538	61	NARG2	0	intronic	1.512	7	4	5	0	0	0
15:60753511:C:T	rs79159359	15	60753511	C	T	0.08245		9.3e-06	-0.0143979	0.00332546	0.971587	rs78087538	61	NARG2	0	intronic	7.925	5	4	5	0	0	0
15:60755474:C:T	rs75179646	15	60755474	C	T	0.08169		1.1e-05	-0.0142393	0.00332419	0.980902	rs78087538	61	NARG2	0	intronic	0.72	7	4	5	0	0	0
15:60756228:A:G	rs76694005	15	60756228	G	A	0.08169		1.1e-05	-0.0142393	0.00332419	0.980902	rs78087538	61	NARG2	0	intronic	4.007	6	4	5	0	0	0
15:60757544:A:C	rs77614308	15	60757544	C	A	0.08094		1.1e-05	-0.0142454	0.00332441	0.990372	rs78087538	61	NARG2	0	intronic	1.421	3a	2	4	0	0	0
15:60769178:A:G	rs114765389	15	60769178	A	G	0.07943		5.5e-06	-0.0148975	0.00335139	0.990308	rs78087538	61	NARG2	0	intronic	NA	3a	1	7	0	0	0
15:60771669:A:G	rs79993780	15	60771669	G	A	0.08094		8.1e-06	-0.0144292	0.00330744	0.990372	rs78087538	61	RP11-219B17.1	0	ncRNA_intronic	3.758	4	1	1	0	0	0
15:60784959:A:G	rs1454100	15	60784959	G	A	0.08699		0.0011	-0.0104564	0.00331292	0.863637	rs78087538	61	RP11-219B17.1:RORA	00:00:00	ncRNA_intronic	0.264	NA	4	15	0	0	0
15:60791962:A:C	rs115957973	15	60791962	A	C	0.07943		4.1e-05	-0.0136064	0.00339562	0.932506	rs78087538	61	RP11-219B17.1:RORA	00:00:00	ncRNA_intronic	6.747	6	4	5	0	0	0
15:60798590:A:G	rs17270181	15	60798590	A	G	0.08169		0.0022	-0.0107612	0.00364723	0.712684	rs78087538	61	RP11-219B17.1:RORA	00:00:00	ncRNA_intronic	5.213	7	4	5	0	0	0
15:60809757:A:G	rs1866008	15	60809757	A	G	0.07262		0.0032	-0.0112561	0.00395059	0.808582	rs78087538	61	RP11-219B17.1:RORA	00:00:00	ncRNA_intronic	5.864	NA	4	5	0	0	0
16:11169283:A:G	rs111867993	16	11169283	A	G	0.149		2.2e-06	-0.0141032	0.00298286	1	rs111867993	62	CLEC16A	0	intronic	7.17	5	4	5	0	0	0
16:12455707:G:T	rs12103349	16	12455707	G	T	0.09077		0.00019	0.0141564	0.00380806	0.887632	rs2278057	63	SNX29	0	intronic	2.229	6	4	15	0	0	0
16:12461417:A:C	rs4781213	16	12461417	A	C	0.09985		0.00016	0.0137965	0.00367554	0.859407	rs2278057	63	SNX29:RP11-165M1.3	00:00:00	ncRNA_intronic	6.446	5	4	15	0	0	0
16:12462728:G:T	rs4781215	16	12462728	G	T	0.09228		5e-05	0.0152658	0.00377369	0.939315	rs2278057	63	SNX29:RP11-165M1.3	00:00:00	ncRNA_intronic	2.756	4	4	15	0	0	0
16:12464183:A:G	rs4780424	16	12464183	G	A	0.09682		2.3e-06	0.0174581	0.00369795	0.991336	rs2278057	63	SNX29:RP11-165M1.3	00:00:00	ncRNA_intronic	1.654	7	5	15	0	0	0
16:12465719:C:G	rs8061414	16	12465719	G	C	0.1036		1.2e-05	0.0157316	0.00359705	0.918606	rs2278057	63	SNX29:RP11-165M1.3	00:00:00	ncRNA_intronic	3.721	7	5	15	0	0	0
16:12468091:C:T	rs2278057	16	12468091	C	T	0.09607		2.1e-06	0.0175533	0.00370706	1	rs2278057	63	SNX29	0	intronic	2.387	NA	4	15	0	0	0
16:12468719:C:G	rs7187494	16	12468719	C	G	0.1029		8.3e-06	0.0160469	0.00360963	0.92625	rs2278057	63	SNX29	0	intronic	0.053	5	4	15	0	0	0
16:12470026:A:G	rs8057111	16	12470026	A	G	0.1036		1.2e-05	0.0157347	0.00359982	0.902374	rs2278057	63	SNX29	0	intronic	2.208	5	5	15	0	0	0
16:84065339:C:T	rs11865522	16	84065339	T	C	0.2602		2.6e-06	0.0100324	0.00214429	1	rs11865522	64	SLC38A8	0	intronic	0.872	5	5	15	0	0	0
16:88927836:C:T	rs77782655	16	88927836	C	T	0.059		0.00043	-0.0141898	0.00400653	0.678627	rs9934287	65	TRAPPC2L	0	UTR3	0.481	5	4	4	0	0	0
16:88947688:C:T	rs9934287	16	88947688	T	C	0.0469		6.6e-06	-0.020735	0.00456864	1	rs9934287	65	CBFA2T3:RP11-830F9.5	00:00:00	ncRNA_exonic	4.808	2b	1	15	0	0	0
16:88984625:C:T	rs9939051	16	88984625	T	C	0.05295		0.00052	-0.0150562	0.0042999	0.601418	rs9934287	65	CBFA2T3	0	intronic	2.911	5	4	15	0	0	0
17:63618413:C:T	rs35943309	17	63618413	C	T	0.2269		5.7e-05	0.00837416	0.00209397	0.783922	rs7207885	66	CTD-2535L24.2	0	intronic	2.514	5	5	15	0	0	0
17:63619276:C:T	rs9913240	17	63619276	C	T	0.3434		4.3e-05	0.00786358	0.00192681	0.658761	rs7207885	66	CTD-2535L24.2	0	intronic	0.518	7	5	15	0	0	0
17:63619922:A:G	rs7207885	17	63619922	A	G	0.2572		1.2e-06	0.00989653	0.00203797	1	rs7207885	66	CTD-2535L24.2	0	intronic	1.347	7	5	15	0	0	0
17:63621104:C:T	rs16962547	17	63621104	T	C	0.264		4e-06	0.00932244	0.00202852	0.965354	rs7207885	66	CTD-2535L24.2	0	intronic	0.389	7	5	15	0	0	0
18:2125022:A:T	rs515963	18	2125022	A	T	0.1823		0.00025	0.00936476	0.00259902	0.655083	rs685058	67	RP11-161I6.2	0	ncRNA_intronic	4.203	6	14	15	0	0	0
18:2133399:C:T	rs475239	18	2133399	C	T	0.143		1.8e-06	0.0141535	0.00298617	0.987418	rs685058	67	RP11-161I6.2	0	ncRNA_intronic	1.756	NA	14	15	0	0	0
18:2137070:A:C	rs2052727	18	2137070	A	C	0.1331		8.2e-06	-0.0133422	0.00301776	0.919064	rs685058	67	RP11-161I6.2	0	ncRNA_intronic	1.541	6	14	15	0	0	0
18:2138628:A:G	rs542896	18	2138628	G	A	0.1959		0.00019	0.00947022	0.00255855	0.690272	rs685058	67	RP11-161I6.2	0	ncRNA_intronic	0.656	6	14	15	0	0	0
18:2141724:C:T	rs503248	18	2141724	C	T	0.143		2.4e-06	0.0138411	0.0029536	0.987298	rs685058	67	RP11-161I6.2	0	ncRNA_intronic	0.835	7	5	15	0	0	0
18:2144117:C:T	rs603382	18	2144117	C	T	0.143		2.7e-06	0.0138549	0.00297766	0.987298	rs685058	67	RP11-161I6.2	0	ncRNA_intronic	0.942	NA	5	15	0	0	0
18:2145371:G:T	rs604504	18	2145371	G	T	0.1422		2.2e-06	0.0139629	0.00297461	0.993642	rs685058	67	RP11-161I6.2	0	ncRNA_intronic	2.527	7	5	15	0	0	0
18:2146395:A:G	rs685058	18	2146395	G	A	0.143	0.857	7.1e-07	0.0144277	0.00293289	1	rs685058	67	RP11-161I6.2	0	ncRNA_intronic	3.513	3a	5	15	0	0	0
18:2147271:A:T	rs684109	18	2147271	A	T	0.1672		9.7e-06	0.0123946	0.00281616	0.812457	rs685058	67	RP11-161I6.2	0	ncRNA_intronic	3.857	6	5	15	0	0	0
18:2148420:C:T	rs538133	18	2148420	C	T	0.152		2.4e-06	0.0136014	0.00290263	0.916358	rs685058	67	RP11-161I6.2	0	ncRNA_intronic	0.689	6	7	15	0	0	0
18:2148722:C:T	rs608174	18	2148722	T	C	0.152		3.2e-06	0.0134024	0.0029006	0.916358	rs685058	67	RP11-161I6.2	0	ncRNA_intronic	4.827	7	7	15	0	0	0
18:2148751:C:G	rs593194	18	2148751	G	C	0.1762		8.5e-06	0.0122761	0.00277217	0.762823	rs685058	67	RP11-161I6.2	0	ncRNA_intronic	NA	6	7	15	0	0	0
18:2148968:A:G	rs542812	18	2148968	G	A	0.1422		2.1e-06	0.0139689	0.00296706	0.993642	rs685058	67	RP11-161I6.2	0	ncRNA_intronic	4.531	5	7	15	0	0	0
18:2153852:C:G	rs1426226	18	2153852	G	C	0.1377		9.2e-06	-0.0135023	0.00307779	0.799452	rs685058	67	RP11-161I6.2	0	ncRNA_intronic	0.682	7	7	15	0	0	0
18:20316142:C:G	rs56116224	18	20316142	C	G	0.06278		0.00055	0.01454	0.0042093	0.6046	rs111529616	68	RP11-739L10.1:RP11-370A5.1	00:00:00	ncRNA_intronic	0.039	5	5	15	0	0	0
18:20326312:C:T	rs73392837	18	20326312	T	C	0.05522		0.0001	0.0178163	0.00457658	0.609206	rs111529616	68	RP11-739L10.1:RP11-370A5.1	00:00:00	ncRNA_intronic	2.794	7	9	15	0	0	0
18:20327117:A:T	rs73392841	18	20327117	T	A	0.05522		0.00016	0.0173933	0.00458799	0.609206	rs111529616	68	RP11-739L10.1:RP11-370A5.1	00:00:00	ncRNA_intronic	13.74	7	9	15	0	0	0
18:20336951:A:G	rs73392862	18	20336951	A	G	0.06278		0.00048	0.0147066	0.0042137	0.6046	rs111529616	68	RP11-739L10.1:RP11-370A5.1	00:00:00	ncRNA_intronic	4.686	7	13	15	0	0	0
18:20354804:C:T	rs79970343	18	20354804	T	C	0.06051		0.0003	0.0152824	0.00422533	0.622644	rs111529616	68	RP11-739L10.1:RP11-370A5.1	00:00:00	ncRNA_intronic	10.52	6	5	15	0	0	0
18:20361765:A:G	rs61422173	18	20361765	A	G	0.06051		0.00023	0.015619	0.00423913	0.622644	rs111529616	68	RP11-739L10.1:RP11-370A5.1	00:00:00	ncRNA_intronic	10.44	6	5	15	0	0	0
18:20374886:G:T	rs112781375	18	20374886	T	G	0.0643		0.00011	0.0151966	0.00392852	0.700339	rs111529616	68	RP11-739L10.1:RP11-370A5.1	00:00:00	ncRNA_intronic	8.327	7	5	15	0	0	0
18:20402596:C:T	rs73394836	18	20402596	T	C	0.06808		0.0002	0.0146179	0.00391719	0.719769	rs111529616	68	RP11-739L10.1:RP11-370A5.1:RBBP8	00:00:00	ncRNA_intronic	6.321	7	2	15	0	0	0
18:20407960:A:G	rs73394840	18	20407960	G	A	0.05825		7.3e-05	0.0168496	0.00421703	0.736275	rs111529616	68	RP11-739L10.1:RP11-370A5.1:RBBP8	00:00:00	ncRNA_intronic	12.34	5	2	15	0	0	0
18:20409105:G:T	rs76843077	18	20409105	G	T	0.06732		0.0002	0.0145786	0.00390449	0.725703	rs111529616	68	RP11-739L10.1:RP11-370A5.1:RBBP8	00:00:00	ncRNA_intronic	1.113	6	5	15	0	0	0
18:20475549:C:T	rs73396816	18	20475549	T	C	0.05825		3e-05	0.0178303	0.00424194	0.736275	rs111529616	68	RP11-739L10.1:RP11-370A5.1:RBBP8	00:00:00	ncRNA_intronic	1.576	7	13	15	0	0	0
18:20484530:C:T	rs73396825	18	20484530	T	C	0.06581		4.8e-05	0.0158609	0.0038948	0.742183	rs111529616	68	RP11-739L10.1:RP11-370A5.1:RBBP8	00:00:00	ncRNA_intronic	1.785	6	4	15	0	0	0
18:20484839:A:G	rs73396829	18	20484839	A	G	0.06581		4.8e-05	0.0158609	0.0038948	0.742183	rs111529616	68	RP11-739L10.1:RP11-370A5.1:RBBP8	00:00:00	ncRNA_intronic	7.078	6	5	15	0	0	0
18:20490427:A:G	rs73396836	18	20490427	G	A	0.06581		6.6e-05	0.0156722	0.00391656	0.742183	rs111529616	68	RP11-739L10.1:RBBP8	00:00:00	ncRNA_intronic	2.315	6	4	15	0	0	0
18:20496486:A:G	rs73396846	18	20496486	G	A	0.06581		6.7e-05	0.0156711	0.00391748	0.742183	rs111529616	68	RP11-739L10.1:RBBP8	00:00:00	ncRNA_intronic	19.07	6	1	15	1	1	0
18:20499856:C:T	rs73396855	18	20499856	T	C	0.06581		6.6e-05	0.0156663	0.00391593	0.742183	rs111529616	68	RP11-739L10.1:RBBP8	00:00:00	ncRNA_intronic	0.23	6	1	15	0	0	0
18:20502081:A:G	rs73396864	18	20502081	A	G	0.05825		3.4e-05	0.0176088	0.00422065	0.736275	rs111529616	68	RP11-739L10.1:RBBP8	00:00:00	ncRNA_intronic	8.473	7	5	15	0	0	0
18:20513698:C:G	rs111884214	18	20513698	G	C	0.06657		0.0012	0.0135504	0.00416622	0.753965	rs111529616	68	RP11-739L10.1:RBBP8	00:00:00	ncRNA_exonic	9.134	4	1	1	0	0	0
18:20515983:A:G	rs73396892	18	20515983	G	A	0.06051		6.2e-05	0.0161883	0.00401163	0.841797	rs111529616	68	RBBP8	0	intronic	2.069	5	1	5	0	0	0
18:20516135:A:G	rs111238505	18	20516135	A	G	0.06051		6.1e-05	0.016199	0.00401125	0.841797	rs111529616	68	RBBP8	0	intronic	0.049	7	1	5	0	0	0
18:20540099:A:G	rs111908491	18	20540099	A	G	0.06051		8e-05	0.0161998	0.00406821	0.841797	rs111529616	68	RBBP8	0	intronic	0.234	7	4	5	0	0	0
18:20585399:C:T	rs113047993	18	20585399	T	C	0.06127		0.00011	0.015867	0.00407178	0.85374	rs111529616	68	RBBP8	0	intronic	0.831	6	4	5	0	0	0
18:20589490:A:T	rs114636233	18	20589490	T	A	0.05976		0.00022	0.0151351	0.00405413	0.878442	rs111529616	68	RBBP8	0	intronic	0.043	6	4	5	0	0	0
18:20594508:C:G	rs113617689	18	20594508	C	G	0.05976		8.8e-05	0.0161153	0.0040672	0.878442	rs111529616	68	RBBP8	0	intronic	0.748	7	4	5	0	0	0
18:20617751:A:T	rs73398677	18	20617751	T	A	0.06354		1.3e-05	0.0172091	0.00390714	0.938816	rs111529616	68	RBBP8	11299	intergenic	0.665	3a	5	15	0	0	0
18:20618365:C:T	rs60802037	18	20618365	T	C	0.07186		0.00012	0.0139846	0.00361572	0.709351	rs111529616	68	RBBP8	11913	intergenic	1.436	7	5	15	0	0	0
18:20619729:A:G	rs111529616	18	20619729	A	G	0.06732		6.8e-06	0.0176935	0.00389574	1	rs111529616	68	RBBP8	13277	intergenic	2.798	7	5	15	0	0	0
18:20621621:C:T	rs56177525	18	20621621	C	T	0.06127		3.9e-05	0.0166784	0.00401322	0.90245	rs111529616	68	RBBP8	15169	intergenic	8.284	5	5	15	0	0	0
18:20623281:A:G	rs61233784	18	20623281	A	G	0.06657		1.5e-05	0.016718	0.00381413	0.987678	rs111529616	68	RBBP8	16829	intergenic	2.172	5	5	15	0	0	0
18:20623385:A:G	rs57123144	18	20623385	A	G	0.06581		1.5e-05	0.016718	0.00381413	0.975399	rs111529616	68	RBBP8	16933	intergenic	8.114	5	5	15	0	0	0
18:20623520:C:T	18:20623520	18	20623520	T	C	0.06505		8.9e-06	0.01748	0.0038997	0.963162	rs111529616	68	RBBP8	17068	intergenic	1.482	7	5	15	0	0	0
18:20623695:A:G	rs112201754	18	20623695	A	G	0.06127		3.7e-05	0.0166949	0.0040068	0.90245	rs111529616	68	RBBP8	17243	intergenic	1.517	7	5	15	0	0	0
18:20628694:A:C	rs113690746	18	20628694	A	C	0.06505		2.5e-05	0.0162732	0.00382319	0.963162	rs111529616	68	RBBP8	22242	intergenic	0.126	7	5	15	0	0	0
18:20629761:C:T	rs73398699	18	20629761	T	C	0.06505		3.7e-05	0.0156422	0.00375778	0.939325	rs111529616	68	RBBP8	23309	intergenic	0.955	2b	2	15	0	0	0
18:20633388:A:G	rs113174114	18	20633388	A	G	0.06127		0.00011	0.0153329	0.00392614	0.902608	rs111529616	68	RBBP8	26936	intergenic	2.067	7	5	15	0	0	0
18:20633499:A:G	rs112552319	18	20633499	A	G	0.05749		0.00011	0.015979	0.00409262	0.842739	rs111529616	68	RBBP8	27047	intergenic	0.557	7	5	15	0	0	0
18:20634465:C:T	rs73400606	18	20634465	T	C	0.05825		0.00013	0.0153077	0.00396902	0.830229	rs111529616	68	RBBP8	28013	intergenic	1.8	5	2	15	0	0	0
19:36082053:C:T	rs147129462	19	36082053	C	T	0.01664		6.2e-05	-0.0364467	0.00903805	0.913798	rs140186262	69	AC002115.5	6755	intergenic	7.712	7	13	14	0	0	0
19:36086748:A:G	rs139681712	19	36086748	A	G	0.01664		4.5e-05	-0.036236	0.00881341	0.913798	rs140186262	69	AC002115.5	2060	intergenic	1.013	7	14	15	0	0	0
19:36090748:A:G	rs114609369	19	36090748	A	G	0.01664		6.2e-05	-0.0352041	0.00872579	0.913798	rs140186262	69	AC002115.5	0	ncRNA_intronic	0.938	7	13	15	0	0	0
19:36091057:C:T	rs185917147	19	36091057	T	C	0.01664		6.2e-05	-0.0352041	0.00872579	0.913798	rs140186262	69	AC002115.5	0	ncRNA_intronic	5.786	7	13	15	0	0	0
19:36091542:A:G	rs116532205	19	36091542	A	G	0.01664		6.2e-05	-0.0352041	0.00872579	0.913798	rs140186262	69	AC002115.5	0	ncRNA_splicing	9.256	5	13	15	0	0	0
19:36092489:A:G	rs115591423	19	36092489	G	A	0.01664		6.3e-05	-0.0351183	0.00871733	0.913798	rs140186262	69	AC002115.5	85	downstream	0.165	6	13	15	0	0	0
19:36094276:G:T	rs116658603	19	36094276	T	G	0.01664		6.5e-05	-0.0350924	0.00871892	0.913798	rs140186262	69	AC002115.5	1872	intergenic	0.384	7	14	15	0	0	0
19:36098133:G:T	rs150476716	19	36098133	T	G	0.01664		5e-05	-0.035544	0.00869695	0.913798	rs140186262	69	AC002115.9	1053	intergenic	4.87	4	5	15	0	0	0
19:36101791:A:C	rs114901615	19	36101791	A	C	0.01664		4.5e-05	-0.0357506	0.00869801	0.913798	rs140186262	69	AC002115.9	0	ncRNA_intronic	2.419	7	5	15	0	0	0
19:36103460:C:G	rs8106440	19	36103460	C	G	0.0174		5.4e-05	-0.0361107	0.00889058	0.877753	rs140186262	69	AC002115.9	0	ncRNA_intronic	0.962	2b	1	1	0	0	0
19:36106353:C:T	rs114690856	19	36106353	T	C	0.01664		5.2e-05	-0.035813	0.00880133	0.913798	rs140186262	69	HAUS5	0	intronic	4.832	5	4	4	0	0	0
19:36111168:A:C	rs61738561	19	36111168	A	C	0.0174		3.4e-05	-0.0365898	0.00877393	0.872441	rs140186262	69	HAUS5	0	exonic	15.87	3a	4	4	1	0	1
19:36116590:C:T	rs114650822	19	36116590	C	T	0.01664		3e-05	-0.0367847	0.00877234	0.913798	rs140186262	69	HAUS5	338	downstream	8.007	6	5	5	0	0	0
19:36126946:G:T	rs539838848	19	36126946	T	G	0.0174		2.2e-05	-0.037695	0.00883486	0.872441	rs140186262	69	RBM42	0	intronic	0.729	NA	4	4	0	0	0
19:36131797:C:G	rs115399719	19	36131797	G	C	0.0174		1.7e-05	-0.0358765	0.00827764	0.872441	rs140186262	69	ETV2	849	upstream	13.27	6	5	5	1	0	0
19:36132761:A:C	rs114346731	19	36132761	A	C	0.0174		1.6e-05	-0.0358809	0.00827406	0.872441	rs140186262	69	ETV2	0	UTR5	9.154	2a	1	5	0	0	0
19:36135268:C:G	rs375155035	19	36135268	G	C	0.01815		1.6e-05	-0.0359236	0.00826017	0.834531	rs140186262	69	ETV2	0	exonic	8.048	4	1	1	0	0	0
19:36143990:C:T	rs7256069	19	36143990	T	C	0.01967		7.6e-05	-0.0286533	0.00716939	0.842088	rs140186262	69	COX6B1	0	intronic	2.756	6	4	5	0	0	0
19:36159533:C:T	rs61730228	19	36159533	T	C	0.0174		6.2e-06	-0.0394022	0.0086875	0.956831	rs140186262	69	UPK1A:UPK1A-AS1	00:00:00	exonic	12.33	5	5	14	0	0	0
19:36174873:C:T	rs114691017	19	36174873	T	C	0.01891		0.00013	-0.0298152	0.00773451	0.877276	rs140186262	69	AC002314.4	0	ncRNA_exonic	16.25	2b	5	15	1	0	0
19:36175252:G:T	rs116407429	19	36175252	G	T	0.01891		0.00013	-0.0298152	0.00773451	0.877276	rs140186262	69	AC002314.4	148	upstream	5.306	7	5	15	0	0	0
19:36176390:A:G	rs115933593	19	36176390	A	G	0.01891		6.5e-06	-0.0393361	0.0087007	0.877276	rs140186262	69	AC002314.4	1286	intergenic	2.102	7	5	15	0	0	0
19:36183353:G:T	rs115774287	19	36183353	G	T	0.02269		0.00081	-0.0248301	0.00735337	0.792465	rs140186262	69	AC002314.4	8249	intergenic	1.368	4	5	15	0	0	0
19:36199274:A:G	rs114237808	19	36199274	A	G	0.01967		7e-05	-0.0311187	0.00777349	0.920179	rs140186262	69	ZBTB32	0	intronic	0.56	5	4	15	0	0	0
19:36209954:A:G	rs115017738	19	36209954	A	G	0.02269		0.00072	-0.025077	0.00736942	0.792465	rs140186262	69	KMT2B:KMT2B	00:00:00	ncRNA_intronic	4.776	2b	1	2	0	0	0
19:36210627:A:G	rs114140622	19	36210627	A	G	0.01815		5.5e-06	-0.039805	0.00873416	1	rs140186262	69	KMT2B:KMT2B	00:00:00	ncRNA_intronic	0.051	4	2	6	0	0	0
19:36221232:C:T	rs114427608	19	36221232	T	C	0.01967		1.6e-05	-0.0336229	0.00773982	0.920179	rs140186262	69	KMT2B:KMT2B	00:00:00	ncRNA_intronic	1.132	5	3	4	0	0	0
19:36221353:C:T	rs34980546	19	36221353	T	C	0.01967		3.2e-05	-0.0316232	0.00753638	0.920179	rs140186262	69	KMT2B:KMT2B	00:00:00	exonic	14.81	NA	3	4	0	0	0
19:36241673:C:G	rs140186262	19	36241673	G	C	0.01815		5.2e-06	-0.0399704	0.00875041	1	rs140186262	69	AC002398.9:AC002398.11:LIN37	00:00:00	ncRNA_intronic	0.338	7	4	5	0	0	0
19:36249685:A:C	rs148747066	19	36249685	A	C	0.01815		5.2e-05	-0.0321559	0.00788618	1	rs140186262	69	C19orf55	0	intronic	4.432	3a	1	1	0	0	0
19:36249703:A:G	rs142143037	19	36249703	A	G	0.01891		5.2e-05	-0.0321559	0.00788618	0.958493	rs140186262	69	C19orf55	0	intronic	2.932	3a	1	1	0	0	0
19:36262466:A:G	rs150789148	19	36262466	A	G	0.02042		4.5e-05	-0.0327027	0.00797178	0.894181	rs140186262	69	C19orf55:AC002398.13	535:535	upstream	4.18	6	5	5	0	0	0
19:36265723:A:G	rs115323422	19	36265723	A	G	0.02042		4.6e-05	-0.0326606	0.007973	0.894181	rs140186262	69	ARHGAP33	0	upstream	7.26	2b	1	2	0	0	0
19:36271004:A:G	19:36271004	19	36271004	A	G	0.02042		2.1e-05	-0.0373973	0.00876059	0.894181	rs140186262	69	ARHGAP33	0	intronic	3.197	5	4	4	0	0	0
19:36280209:G:T	rs572145347	19	36280209	T	G	0.02042		2e-05	-0.0378429	0.00883861	0.894181	rs140186262	69	AC002398.5	0	ncRNA_intronic	1.419	NA	3	5	0	0	0
19:36298085:A:G	rs3761086	19	36298085	G	A	0.02648		1.3e-05	-0.0344648	0.00779527	0.635527	rs140186262	69	PRODH2	0	intronic	2.74	NA	4	14	0	0	0
19:36299268:A:G	rs116667279	19	36299268	A	G	0.02421		0.00013	-0.0345493	0.00895537	0.694938	rs140186262	69	PRODH2	0	intronic	0.065	4	4	14	0	0	0
19:36317544:A:G	rs35240811	19	36317544	A	G	0.02496		0.00027	-0.0333683	0.00908932	0.692869	rs140186262	69	NPHS1	0	exonic	0.057	NA	5	14	0	0	0
19:36319300:A:G	rs112770238	19	36319300	A	G	0.02496		0.0031	-0.0202536	0.00671467	0.692869	rs140186262	69	NPHS1	0	intronic	1.575	7	5	14	0	0	0
19:36322330:C:T	rs113474483	19	36322330	T	C	0.02496		0.012	-0.0209991	0.00819991	0.692869	rs140186262	69	NPHS1	0	intronic	7.664	5	7	14	0	0	0
19:36325437:C:T	rs115900005	19	36325437	T	C	0.02572		0.012	-0.0168052	0.00650526	0.618136	rs140186262	69	NPHS1	0	intronic	4.487	5	5	14	0	0	0
19:36336292:A:G	rs34761059	19	36336292	A	G	0.02648		0.038	-0.0142831	0.00666502	0.60131	rs140186262	69	NPHS1	0	exonic	15.98	NA	1	11	0	0	0
19:36342879:C:T	rs79692855	19	36342879	T	C	0.02572		0.036	-0.0141283	0.00652359	0.618136	rs140186262	69	NPHS1	0	upstream	0.503	7	1	14	0	0	0
19:36346060:C:G	rs76814569	19	36346060	G	C	0.02572		0.029	-0.015097	0.00668703	0.618136	rs140186262	69	NPHS1	0	upstream	3.514	2b	5	13	0	0	0
19:36365112:G:T	rs75163794	19	36365112	T	G	0.02572		0.024	-0.0134637	0.00586107	0.618136	rs140186262	69	APLP1	0	intronic	1.006	7	4	14	0	0	0
19:36368260:A:G	rs115704949	19	36368260	A	G	0.02496		0.043	-0.0139744	0.00667243	0.635872	rs140186262	69	APLP1	0	intronic	0.119	7	4	14	0	0	0
20:1883451:A:G	rs6045318	20	1883451	G	A	0.02421	0.97579	4.7e-08	-0.0313981	0.0058449	1	rs6045318	70	SIRPA	0	intronic	5.604	7	4	5	0	0	0
21:27091975:A:G	rs73335986	21	27091975	G	A	0.1195		6.6e-06	-0.012371	0.00276723	1	rs73335986	71	ATP5J	0	intronic	11.07	7	4	5	0	0	0
22:18919299:C:G	rs146609710	22	18919299	G	C	0.04009		7.7e-05	0.0279912	0.00720906	0.666871	rs28374131	72	PRODH	0	intronic	0.563	3a	4	14	0	0	0
22:18923812:A:G	rs569881481	22	18923812	A	G	0.04387		4.6e-05	0.0268304	0.00670808	0.801943	rs28374131	72	PRODH	0	UTR5	8.215	NA	1	1	0	0	0
22:18936724:A:G	rs12168630	22	18936724	A	G	0.0416		1.7e-05	0.0279358	0.00658964	0.921192	rs28374131	72	PRODH	12657	intergenic	1.877	7	5	15	0	0	0
22:18938200:A:G	rs28374131	22	18938200	A	G	0.03858		5.3e-06	0.0299282	0.00668682	1	rs28374131	72	PRODH	14133	intergenic	NA	5	5	15	0	0	0
22:18943169:C:G	rs150293293	22	18943169	C	G	0.03782		9.9e-06	0.0289933	0.0066887	0.978788	rs28374131	72	DGCR5	14857	intergenic	0.62	5	5	15	0	0	0
22:18943899:C:T	rs9618427	22	18943899	T	C	0.0416		3.5e-05	0.026853	0.00662749	0.924354	rs28374131	72	DGCR5	14127	intergenic	5.337	5	5	15	0	0	0
