# Supplementary material for: Genetic associations with carotid intima-media thickness link to atherosclerosis biology with sex-differences in sub-Saharan Africans
Source: Research Square preprint supplement (doi:10.21203/rs.3.rs-147838/v1), 2021-01-22
Supplement: Supplementary file 11 [file 31f174a01695559ac7d83bd5.xlsx]

## Sheet: snps
uniqID	rsID	chr	pos	non_effect_allele	effect_allele	MAF		gwasP	beta	se	r2	IndSigSNP	GenomicLocus	nearestGene	dist	func	CADD	RDB	minChrState	commonChrState	posMapFilt	eqtlMapFilt	ciMapFilt
1:14837479:C:T	rs78112219	1	14837479	T	C	0.152	0.848	4.5e-06	-0.0170195	0.00371732	1	rs78112219	1	KAZN	87720	intergenic	2.136	7	5	15	0	0	0
1:70168078:A:T	rs75208957	1	70168078	A	T	0.03177	0.96823	2.2e-05	-0.0292904	0.00702056	0.976343	rs114048798	2	LRRC7	0	intronic	11.92	2b	5	15	0	0	0
1:70181382:C:T	rs114048798	1	70181382	C	T	0.03253	0.96747	5.8e-06	-0.0309177	0.00693302	1	rs114048798	2	LRRC7	0	intronic	3.772	6	5	15	0	0	0
1:106328438:A:G	rs114371641	1	106328438	G	A	0.02572	0.97428	1.1e-05	0.0434173	0.00983295	0.910573	rs116588053	3	SEPT2P1	87597	intergenic	1.872	7	9	15	0	0	0
1:106357181:A:G	rs116589441	1	106357181	A	G	0.02572	0.97428	1.6e-06	0.0467843	0.00970706	0.910573	rs116588053	3	RP11-90H3.2	76133	intergenic	3.139	7	9	15	0	0	0
1:106360666:C:G	rs114736793	1	106360666	G	C	0.02648	0.97352	1.4e-06	0.047163	0.0097394	0.940572	rs116588053	3	RP11-90H3.2	72648	intergenic	0.435	7	9	15	0	0	0
1:106375545:C:G	rs116588053	1	106375545	C	G	0.02648	0.97352	1.1e-06	0.049368	0.010088	1	rs116588053	3	RP11-90H3.2	57769	intergenic	0.959	6	9	15	0	0	0
1:106465874:C:T	rs116814687	1	106465874	C	T	0.03707	0.96293	2.6e-06	0.049469	0.0103805	0.731746	rs116672087	3	RP11-24P14.1	4371	intergenic	3.378	6	15	15	0	0	0
1:106499365:C:G	rs113999579	1	106499365	C	G	0.03933	0.96067	2.6e-06	0.049519	0.0104152	0.685095	rs116672087	3	RP11-24P14.1	0	ncRNA_intronic	0.058	5	9	15	0	0	0
1:106514615:A:G	rs116672087	1	106514615	G	A	0.03631	0.96369	8.2e-07	0.0526202	0.0105712	1	rs116672087	3	RP11-24P14.1	0	ncRNA_intronic	4.107	7	9	15	0	0	0
1:106521505:C:T	rs115820193	1	106521505	T	C	0.03555	0.96445	3.1e-06	0.0511098	0.0108675	0.977572	rs116672087	3	RP11-24P14.1	0	ncRNA_intronic	1.207	7	9	15	0	0	0
1:106533825:C:T	rs115541817	1	106533825	T	C	0.03631	0.96369	3e-06	0.0491215	0.0104067	1	rs116672087	3	RP11-24P14.1	0	ncRNA_intronic	4.194	7	9	15	0	0	0
1:106569386:A:C	rs78650354	1	106569386	C	A	0.05446	0.94554	0.0055	0.0216365	0.00769861	0.650588	rs116672087	3	RP11-24P14.1	3551	intergenic	4.115	6	14	15	0	0	0
1:106581078:C:T	rs114153689	1	106581078	T	C	0.03101	0.96899	5.9e-06	0.0465732	0.0101991	0.844523	rs116672087	3	RP11-24P14.1	15243	intergenic	3.845	4	9	15	0	0	0
1:111002804:A:C	rs74348547	1	111002804	A	C	0.118	0.882	7.7e-05	-0.0151751	0.00383071	0.63214	rs4839398	4	PROK1:RP11-470L19.5	2827:2827	intergenic	5.397	4	5	15	0	0	0
1:111003169:A:T	rs17025817	1	111003169	T	A	0.1263	0.8737	8.7e-05	-0.0149407	0.00380801	0.698333	rs4839398	4	PROK1:RP11-470L19.5	3192:3192	intergenic	1.576	4	5	15	0	0	0
1:111006986:A:G	rs4839398	1	111006986	G	A	0.1536	0.8464	8.9e-07	-0.0181135	0.00370243	1	rs4839398	4	PROK1:RP11-470L19.5	7009:7009	intergenic	7.349	4	2	15	0	0	0
1:111011847:A:G	rs11102115	1	111011847	G	A	0.149	0.851	2.5e-06	-0.0173168	0.00369058	0.77704	rs4839398	4	CYMP	11526	intergenic	1.657	6	5	15	0	0	0
1:111012068:A:G	rs12046981	1	111012068	A	G	0.149	0.851	2.3e-06	-0.0174056	0.00369226	0.77704	rs4839398	4	CYMP	11305	intergenic	0.467	7	5	15	0	0	0
1:111020548:C:T	rs115473055	1	111020548	T	C	0.08018	0.91982	1e-08	-0.0260657	0.00456505	1	rs115473055	4	CYMP	2825	intergenic	5.949	2b	2	15	0	0	0
1:111026974:A:G	rs13373838	1	111026974	A	G	0.07035	0.92965	9.6e-06	-0.0243808	0.00551426	1	rs13373838	4	CYMP	0	ncRNA_intronic	2.365	5	5	15	0	0	0
1:111033882:A:G	rs140337389	1	111033882	A	G	0.06127	0.93873	9.5e-08	-0.0367132	0.0069022	1	rs140337389	4	CYMP	0	ncRNA_exonic	0.794	3a	5	15	0	0	0
1:111059237:C:G	rs143792071	1	111059237	G	C	0.06657	0.93343	6.8e-05	-0.0269144	0.00675849	0.676659	rs140337389	4	KCNA10	601	downstream	8.452	6	5	14	0	0	0
1:192427329:C:G	rs4658030	1	192427329	C	G	0.02042	0.97958	3.9e-06	-0.0490466	0.0106163	1	rs4658030	5	AL136987.1	32928	intergenic	0.486	7	5	15	0	0	0
1:192817891:C:T	rs111732913	1	192817891	T	C	0.01664	0.98336	4.3e-06	-0.0427076	0.00937654	1	rs111732913	6	RN7SKP126	26924	intergenic	0.559	5	5	15	0	0	0
1:192818712:C:T	rs75776999	1	192818712	C	T	0.01891	0.98109	4.5e-05	-0.0361223	0.00892577	0.885396	rs111732913	6	RN7SKP126	26103	intergenic	2.715	2b	5	15	0	0	0
1:205383118:A:G	rs76385342	1	205383118	A	G	0.03631	0.96369	1.5e-06	-0.0365591	0.007662	1	rs76385342	7	LEMD1	0	intronic	4.076	7	4	14	0	0	0
1:227990713:C:T	rs10799452	1	227990713	T	C	0.2148	0.7852	2.3e-05	-0.0138087	0.00322646	0.875638	rs12075593	8	PRSS38	12680	intergenic	8.573	6	5	15	0	0	0
1:227993868:C:G	rs12057467	1	227993868	C	G	0.2163	0.7837	2.5e-05	-0.0137594	0.00322699	0.875102	rs12075593	8	PRSS38	9525	intergenic	NA	4	5	15	0	0	0
1:227996064:A:G	rs6702713	1	227996064	G	A	0.2156	0.7844	2.5e-05	-0.0137546	0.00322688	0.879407	rs12075593	8	PRSS38	7329	intergenic	1.735	5	5	15	0	0	0
1:227999132:C:T	rs12075593	1	227999132	T	C	0.2383	0.7617	8.3e-06	-0.0140982	0.00313298	1	rs12075593	8	PRSS38	4261	intergenic	4.16	7	9	15	0	0	0
1:228003967:A:G	rs12121588	1	228003967	A	G	0.2163	0.7837	2.6e-05	-0.0137094	0.00322727	0.875102	rs12075593	8	PRSS38	0	intronic	3.591	5	7	15	0	0	0
1:228006435:C:T	rs10916216	1	228006435	C	T	0.2693	0.7307	0.0082	-0.00790717	0.0029261	0.655533	rs12075593	8	PRSS38	0	intronic	NA	5	9	15	0	0	0
1:228008213:A:G	rs10916218	1	228008213	A	G	0.2163	0.7837	2.6e-05	-0.0137225	0.00322763	0.875102	rs12075593	8	PRSS38	0	intronic	0.232	5	9	15	0	0	0
1:228009844:A:C	rs10916221	1	228009844	A	C	0.2156	0.7844	3.8e-05	0.0134003	0.00321826	0.879407	rs12075593	8	PRSS38	0	intronic	3.876	7	9	15	0	0	0
1:228009853:C:G	rs10916222	1	228009853	G	C	0.2156	0.7844	3.8e-05	0.0134003	0.00321826	0.879407	rs12075593	8	PRSS38	0	intronic	1.552	7	9	15	0	0	0
1:228010782:C:T	rs7410917	1	228010782	T	C	0.2141	0.7859	2.9e-05	0.0136092	0.00322082	0.871724	rs12075593	8	PRSS38	0	intronic	6.013	5	9	15	0	0	0
1:228013938:A:C	rs10916223	1	228013938	C	A	0.1936	0.8064	3.6e-05	0.0139546	0.00334809	0.741497	rs12075593	8	PRSS38	0	intronic	5.753	7	9	15	0	0	0
2:32062127:A:C	rs139454995	2	32062127	C	A	0.01362	0.98638	3.2e-07	-0.0595189	0.0116084	1	rs139454995	9	AK2P2	13240	intergenic	9.33	7	5	15	0	0	0
2:119462737:C:G	rs56138556	2	119462737	G	C	0.06354	0.93646	3e-06	-0.0219385	0.00473989	1	rs56138556	10	RP11-19E11.1	128538	intergenic	NA	4	5	15	0	0	0
2:164506679:G:T	rs36014468	2	164506679	G	T	0.0885	0.9115	7.2e-06	0.0212013	0.00471825	1	rs36014468	11	FIGN	0	intronic	2.463	7	5	15	0	0	0
3:29453939:A:C	rs72852394	3	29453939	A	C	0.03328	0.96672	3.6e-05	-0.0301297	0.00725973	0.636585	rs9830575	12	RBMS3	0	intronic	9.743	7	5	15	0	0	0
3:29486586:A:G	rs9830575	3	29486586	G	A	0.02572	0.97428	5.8e-07	-0.0407507	0.00811504	1	rs9830575	12	RBMS3	0	intronic	6.917	6	4	15	0	0	0
3:29489607:A:G	rs4334600	3	29489607	A	G	0.03858	0.96142	1.5e-05	0.0304669	0.00697193	0.648591	rs9830575	12	RBMS3	0	intronic	1.288	5	4	15	0	0	0
3:29492736:A:G	rs2371612	3	29492736	G	A	0.03177	0.96823	1.7e-05	-0.0312382	0.00724953	0.799195	rs9830575	12	RBMS3	0	intronic	0.737	6	5	15	0	0	0
3:29494312:A:G	rs28538232	3	29494312	G	A	0.03631	0.96369	0.0081	-0.0172948	0.006454	0.692517	rs9830575	12	RBMS3	0	intronic	1.198	6	5	15	0	0	0
3:29498759:A:T	rs9866603	3	29498759	T	A	0.03555	0.96445	0.011	-0.0164587	0.00636709	0.708405	rs9830575	12	RBMS3	0	intronic	3.916	7	4	15	0	0	0
3:29499029:A:G	rs9866984	3	29499029	G	A	0.03101	0.96899	2.2e-05	-0.0311107	0.00728807	0.82001	rs9830575	12	RBMS3	0	intronic	11.89	6	5	15	0	0	0
3:29500834:A:G	rs9811898	3	29500834	A	G	0.0348	0.9652	0.0039	-0.0190273	0.00650399	0.724984	rs9830575	12	RBMS3	0	intronic	3.934	5	4	15	0	0	0
3:29504390:A:C	rs62236891	3	29504390	A	C	0.03101	0.96899	1.9e-05	-0.0314355	0.00730259	0.82001	rs9830575	12	RBMS3	0	intronic	1.093	7	4	15	0	0	0
3:29505697:C:T	rs9310902	3	29505697	T	C	0.03101	0.96899	1.8e-05	-0.0314862	0.00730854	0.82001	rs9830575	12	RBMS3	0	intronic	2.223	5	4	15	0	0	0
3:29519698:C:T	rs9809198	3	29519698	T	C	0.02874	0.97126	3.9e-05	-0.0302727	0.00731967	0.889029	rs9830575	12	RBMS3	0	intronic	1.288	5	4	15	0	0	0
3:29527568:C:T	rs9843243	3	29527568	C	T	0.02572	0.97428	3.6e-05	-0.0313916	0.00755763	0.713969	rs9830575	12	RBMS3	0	intronic	2.116	2b	2	15	0	0	0
3:29534573:A:G	rs56953323	3	29534573	A	G	0.02496	0.97504	6e-05	-0.0303135	0.00751045	0.737208	rs9830575	12	RBMS3	0	intronic	2.172	7	5	15	0	0	0
3:29540874:A:C	rs3773034	3	29540874	C	A	0.02572	0.97428	7.5e-05	-0.0295005	0.0074069	0.713969	rs9830575	12	RBMS3	0	intronic	3.006	6	5	15	0	0	0
3:29543965:A:G	rs72855004	3	29543965	A	G	0.02194	0.97806	2.2e-06	-0.0396373	0.00830926	0.785789	rs9830575	12	RBMS3	0	intronic	1.601	7	5	15	0	0	0
3:29557379:A:G	rs62236919	3	29557379	A	G	0.02496	0.97504	2.8e-05	-0.0313134	0.00744163	0.737208	rs9830575	12	RBMS3	0	intronic	5.464	7	2	7	0	0	0
3:29560461:A:G	rs28625754	3	29560461	A	G	0.02496	0.97504	1.6e-05	-0.0319638	0.00737694	0.737208	rs9830575	12	RBMS3	0	intronic	0.307	7	5	15	0	0	0
3:29567658:A:G	rs9822289	3	29567658	A	G	0.02496	0.97504	2.8e-05	-0.0308133	0.00732309	0.737208	rs9830575	12	RBMS3	0	intronic	1.955	6	5	15	0	0	0
3:29569688:C:G	rs28513301	3	29569688	G	C	0.02194	0.97806	8.4e-07	-0.039946	0.00807416	0.785789	rs9830575	12	RBMS3	0	intronic	1.111	6	5	15	0	0	0
3:29574767:G:T	rs62236937	3	29574767	T	G	0.02496	0.97504	0.00012	-0.0269919	0.00696245	0.737208	rs9830575	12	RBMS3	0	intronic	0.796	7	5	15	0	0	0
3:29611323:A:C	rs149862874	3	29611323	C	A	0.01589	0.98411	0.0018	-0.0277453	0.00882527	0.605101	rs9830575	12	RBMS3	0	intronic	14.08	7	5	15	1	0	0
3:29614126:G:T	rs9875010	3	29614126	G	T	0.01589	0.98411	0.0016	-0.0284793	0.00896173	0.605101	rs9830575	12	RBMS3	0	intronic	0.47	6	5	15	0	0	0
3:59098560:A:G	rs140996658	3	59098560	A	G	0.03101	0.96899	4.8e-05	-0.031449	0.00781098	0.85847	rs143438401	13	CTD-2185K10.1	0	ncRNA_intronic	0.164	7	5	15	0	0	0
3:59101979:C:G	rs76950333	3	59101979	G	C	0.03328	0.96672	5.1e-05	-0.0291789	0.00722644	0.92916	rs143438401	13	CTD-2185K10.1	0	ncRNA_intronic	20.5	5	1	15	1	0	0
3:59102437:G:T	rs147360445	3	59102437	T	G	0.03328	0.96672	5.1e-05	-0.0291789	0.00722644	0.92916	rs143438401	13	CTD-2185K10.1	0	ncRNA_intronic	NA	6	14	15	0	0	0
3:59105075:C:T	rs115403996	3	59105075	T	C	0.03328	0.96672	6.1e-05	-0.0288783	0.00722497	0.92916	rs143438401	13	CTD-2185K10.1	0	ncRNA_exonic	6.406	7	14	15	0	0	0
3:59105600:A:G	rs115639460	3	59105600	G	A	0.03328	0.96672	6.1e-05	-0.0288783	0.00722497	0.92916	rs143438401	13	CTD-2185K10.1	364	downstream	6.352	6	14	15	0	0	0
3:59111084:A:T	rs76910326	3	59111084	A	T	0.03328	0.96672	3.6e-05	-0.033626	0.00820187	0.795027	rs143438401	13	CTD-2185K10.1	5848	intergenic	22.7	5	1	15	1	0	0
3:59111838:C:T	rs60868325	3	59111838	T	C	0.03328	0.96672	5e-05	-0.0291462	0.00720465	0.92916	rs143438401	13	CTD-2185K10.1	6602	intergenic	3.828	5	5	15	0	0	0
3:59111990:C:T	rs59693902	3	59111990	T	C	0.03328	0.96672	5e-05	-0.0291462	0.00720465	0.92916	rs143438401	13	CTD-2185K10.1	6754	intergenic	1.99	6	5	15	0	0	0
3:59116213:A:G	rs77203860	3	59116213	A	G	0.03404	0.96596	8.6e-05	-0.0284532	0.00726649	0.906892	rs143438401	13	CTD-2185K10.1	10977	intergenic	0.679	7	5	15	0	0	0
3:59132205:C:T	rs115827781	3	59132205	T	C	0.03328	0.96672	0.00021	-0.0260504	0.00704384	0.92916	rs143438401	13	CTD-2185K10.1	26969	intergenic	0.019	7	9	15	0	0	0
3:59135664:A:G	rs76911148	3	59135664	A	G	0.03253	0.96747	3.5e-05	-0.0334195	0.00812005	0.952463	rs143438401	13	CTD-2185K10.1	30428	intergenic	8.086	6	7	15	0	0	0
3:59137524:A:G	rs143438401	3	59137524	A	G	0.03404	0.96596	2.1e-06	-0.0368528	0.00781873	1	rs143438401	13	CTD-2185K10.1	32288	intergenic	1.87	6	5	15	0	0	0
3:59143403:A:T	rs75868928	3	59143403	T	A	0.03858	0.96142	0.00055	-0.0232591	0.00673554	0.791624	rs143438401	13	CTD-2185K10.1	38167	intergenic	0.62	6	14	15	0	0	0
3:59147099:C:T	rs146095746	3	59147099	T	C	0.03253	0.96747	1.1e-05	-0.0342975	0.00785836	0.952463	rs143438401	13	CTD-2185K10.1	41863	intergenic	0.01	6	14	15	0	0	0
3:59151229:G:T	rs76964948	3	59151229	T	G	0.03253	0.96747	0.00041	-0.0256288	0.00730724	0.952463	rs143438401	13	CTD-2185K10.1	45993	intergenic	0.959	7	7	15	0	0	0
3:59163034:C:T	rs74400564	3	59163034	T	C	0.03253	0.96747	0.00075	-0.0246075	0.00735625	0.952463	rs143438401	13	CTD-2185K10.1	57798	intergenic	4.311	7	9	15	0	0	0
3:59165314:G:T	rs190620318	3	59165314	T	G	0.03253	0.96747	0.00075	-0.0246075	0.00735625	0.952463	rs143438401	13	CTD-2185K10.1	60078	intergenic	0.782	7	7	15	0	0	0
3:59165315:G:T	rs182890119	3	59165315	T	G	0.03253	0.96747	0.001	-0.0240161	0.00735971	0.952463	rs143438401	13	CTD-2185K10.1	60079	intergenic	1.394	7	7	15	0	0	0
3:59189353:A:G	rs58706722	3	59189353	G	A	0.03101	0.96899	0.00016	-0.0311343	0.00833469	0.72562	rs143438401	13	CTD-2185K10.1	84117	intergenic	4.826	6	13	15	0	0	0
3:59199552:A:T	rs74889481	3	59199552	A	T	0.03782	0.96218	0.00051	-0.0258932	0.00754609	0.617521	rs143438401	13	CTD-2185K10.1	94316	intergenic	20.3	5	5	15	0	0	0
3:59202935:A:G	rs75845968	3	59202935	G	A	0.03026	0.96974	4.3e-05	-0.0339485	0.00840844	0.745521	rs143438401	13	CTD-2185K10.1	97699	intergenic	12.88	7	5	15	0	0	0
3:59219253:A:G	rs74480600	3	59219253	G	A	0.03177	0.96823	5.5e-05	-0.0326151	0.00818764	0.74867	rs143438401	13	CTD-2185K10.1	114017	intergenic	2.228	6	5	15	0	0	0
3:184521774:A:G	rs147365695	3	184521774	G	A	0.05068	0.94932	6.9e-05	-0.0273321	0.00693014	0.717443	rs116831376	14	VPS8	8156	intergenic	0.941	7	5	15	0	0	0
3:184542855:A:G	rs114836848	3	184542855	A	G	0.04917	0.95083	3.8e-05	-0.0313034	0.00771028	0.901841	rs116831376	14	VPS8	0	intronic	0.074	6	4	5	0	0	0
3:184554953:A:G	rs76533207	3	184554953	G	A	0.05144	0.94856	2e-05	-0.030375	0.00721673	0.916083	rs116831376	14	VPS8	0	intronic	8.163	6	4	5	0	0	0
3:184576275:A:G	rs79152715	3	184576275	G	A	0.04992	0.95008	2.2e-05	-0.0300519	0.00719146	0.943709	rs116831376	14	VPS8	0	intronic	4.044	6	4	5	0	0	0
3:184667516:A:G	rs7640111	3	184667516	G	A	0.05144	0.94856	1.7e-05	-0.0304018	0.00717019	0.971761	rs116831376	14	VPS8	0	intronic	4.225	5	4	5	0	0	0
3:184669746:A:G	rs114596080	3	184669746	G	A	0.05144	0.94856	1.7e-05	-0.0304018	0.00717019	0.971761	rs116831376	14	VPS8	0	intronic	18.37	5	4	5	1	0	0
3:184688829:A:G	rs76702108	3	184688829	A	G	0.08094	0.91906	0.00016	-0.0212826	0.00578967	0.637997	rs116831376	14	VPS8	0	intronic	8.45	7	4	5	0	0	0
3:184712016:A:G	rs114147495	3	184712016	G	A	0.05219	0.94781	2.1e-05	-0.0298844	0.00712639	0.985857	rs116831376	14	VPS8	0	intronic	1.715	7	4	5	0	0	0
3:184713107:A:G	rs75139932	3	184713107	A	G	0.05219	0.94781	2.1e-05	-0.029919	0.00712642	0.985857	rs116831376	14	VPS8	0	intronic	3.162	7	4	5	0	0	0
3:184723065:C:T	rs115523847	3	184723065	T	C	0.05219	0.94781	2.1e-05	-0.0298403	0.00712046	0.985857	rs116831376	14	VPS8	0	intronic	3.842	7	4	5	0	0	0
3:184759557:A:G	rs78005671	3	184759557	A	G	0.05219	0.94781	1.8e-05	-0.02995	0.00708626	0.985857	rs116831376	14	VPS8	0	intronic	7.98	4	4	5	0	0	0
3:184780391:A:G	rs574215634	3	184780391	G	A	0.05825	0.94175	1.5e-05	-0.0271299	0.00638785	0.759542	rs116831376	14	VPS8	9988	intergenic	NA	NA	5	15	0	0	0
3:184788789:A:C	rs116831376	3	184788789	A	C	0.05295	0.94705	8.3e-06	-0.0318474	0.00722376	1	rs116831376	14	C3orf70	7048	intergenic	3.029	5	1	15	0	0	0
4:33195210:A:G	rs7670699	4	33195210	G	A	0.04917	0.95083	9.5e-06	0.0358163	0.0080634	1	rs7670699	15	RP11-638O6.1	44650	intergenic	2.925	7	5	15	0	0	0
4:34063945:C:G	rs111302082	4	34063945	G	C	0.07035	0.92965	7.1e-06	-0.0297523	0.00667733	1	rs111302082	16	RP11-79E3.3	22429	intergenic	3.598	6	9	15	0	0	0
4:34234144:A:T	rs187770489	4	34234144	A	T	0.06959	0.93041	9.2e-06	-0.0294299	0.00668828	1	rs187770489	17	RP11-548L20.1	0	ncRNA_intronic	2.582	6	9	15	0	0	0
4:34238382:G:T	rs75698427	4	34238382	T	G	0.0764	0.9236	7e-06	-0.0270707	0.0060534	1	rs75698427	17	RP11-548L20.1	0	ncRNA_intronic	0.111	7	9	15	0	0	0
4:34305397:C:T	rs7656700	4	34305397	T	C	0.07489	0.92511	4.2e-06	-0.0279569	0.00610158	1	rs7656700	18	RP11-548L20.1	34027	intergenic	1.887	7	15	15	0	0	0
4:54487185:C:T	rs79028487	4	54487185	C	T	0.02194	0.97806	7.1e-08	-0.0503627	0.00948349	1	rs79028487	19	FIP1L1:LNX1	00:00:00	intronic	1.898	3a	5	15	0	0	0
4:54488817:A:G	rs145752200	4	54488817	G	A	0.02194	0.97806	6.5e-08	-0.0506785	0.00951672	1	rs145752200	19	FIP1L1:LNX1	00:00:00	intronic	2.762	5	5	15	0	0	0
4:54495071:A:T	rs139178248	4	54495071	A	T	0.02194	0.97806	9.4e-08	-0.0503506	0.009573	1	rs139178248	19	FIP1L1:LNX1	00:00:00	intronic	5.598	7	5	15	0	0	0
4:54508985:C:G	rs78315295	4	54508985	G	C	0.02269	0.97731	1.6e-07	-0.0494276	0.00958297	1	rs78315295	19	FIP1L1:LNX1	00:00:00	intronic	1.704	5	5	15	0	0	0
4:54511431:C:T	rs184055133	4	54511431	T	C	0.02194	0.97806	4.5e-07	-0.0481039	0.00969057	1	rs184055133	19	FIP1L1:LNX1	00:00:00	intronic	15.51	4	5	15	1	0	0
4:54519625:C:T	rs114902663	4	54519625	C	T	0.02345	0.97655	1.1e-06	-0.0429841	0.00902715	1	rs114902663	19	FIP1L1:LNX1	00:00:00	intronic	3.484	2b	2	15	0	0	0
4:89883979:C:T	rs7671167	4	89883979	T	C	0.4191	0.5809	0.00083	-0.00830273	0.00252937	0.724159	rs2013701	20	FAM13A	0	intronic	1.8	6	5	15	0	0	0
4:89885086:G:T	rs2013701	4	89885086	T	G	0.4773	0.5227	2.6e-06	-0.0117127	0.0025313	1	rs2013701	20	FAM13A	0	intronic	0.436	4	2	15	0	0	0
4:89885714:C:T	rs2904259	4	89885714	C	T	0.4085	0.5915	0.00031	-0.00898665	0.00253772	0.758027	rs2013701	20	FAM13A	0	intronic	2.46	4	5	15	0	0	0
4:89886297:C:T	rs1903003	4	89886297	T	C	0.3699	0.6301	0.0015	-0.00813565	0.00261096	0.641383	rs2013701	20	FAM13A	0	intronic	1.529	5	5	15	0	0	0
4:91743767:C:T	rs56712335	4	91743767	T	C	0.4077	0.5923	1.3e-06	0.0128588	0.00264037	1	rs56712335	21	CCSER1	0	intronic	NA	7	5	15	0	0	0
4:108287244:C:G	rs11941798	4	108287244	C	G	0.01815	0.98185	1.8e-06	-0.0552904	0.0115337	1	rs11941798	22	RP11-713M6.2	64216	intergenic	0.051	6	7	15	0	0	0
4:178345422:C:G	rs79862939	4	178345422	C	G	0.03555	0.96445	2.7e-06	-0.0366559	0.00776909	1	rs79862939	23	AGA	6501	intergenic	2.486	6	14	15	0	0	0
4:184789839:C:T	rs62340397	4	184789839	T	C	0.2322	0.7678	4.8e-05	-0.0132597	0.00318955	0.852455	4:184796689	24	STOX2	0	NA	0.779	7	5	15	0	0	0
4:184789877:A:G	rs17075108	4	184789877	G	A	0.2337	0.7663	0.00013	-0.0124018	0.0031619	0.844309	4:184796689	24	STOX2	0	NA	3.99	6	5	15	0	0	0
4:184792121:A:G	rs62340398	4	184792121	A	G	0.2368	0.7632	2.9e-05	-0.0136482	0.00320637	0.877116	4:184796689	24	STOX2	0	NA	5.083	7	5	15	0	0	0
4:184793000:A:G	rs72994786	4	184793000	G	A	0.2375	0.7625	2.4e-05	-0.0137861	0.00320781	0.881036	4:184796689	24	STOX2	0	NA	5.174	5	5	15	0	0	0
4:184794197:C:G	rs17075113	4	184794197	C	G	0.2821	0.7179	0.0013	-0.00985957	0.00299223	0.677626	4:184796689	24	STOX2	0	NA	0.232	5	5	15	0	0	0
4:184795283:C:T	rs61242067	4	184795283	T	C	0.236	0.764	3.5e-06	-0.0154503	0.00328816	0.889133	4:184796689	24	STOX2	0	NA	1.599	5	5	15	0	0	0
4:184796040:C:T	rs113029972	4	184796040	T	C	0.2088	0.7912	1.2e-05	-0.0151176	0.00341118	0.756012	4:184796689	24	STOX2	0	NA	1.564	6	5	15	0	0	0
4:184796689:C:G	4:184796689	4	184796689	G	C	0.2413	0.7587	1.5e-06	-0.0158561	0.00326289	1	4:184796689	24	STOX2	0	NA	0.146	6	5	15	0	0	0
4:184797523:A:G	rs57113243	4	184797523	A	G	0.2927	0.7073	0.0031	-0.00892908	0.00297756	0.71185	4:184796689	24	STOX2	0	NA	5.198	4	1	15	0	0	0
4:184801164:C:T	rs60035547	4	184801164	T	C	0.2753	0.7247	0.012	-0.00768903	0.00300095	0.704095	4:184796689	24	STOX2	0	NA	0.086	7	5	15	0	0	0
4:184801427:A:G	rs57565063	4	184801427	A	G	0.2753	0.7247	0.011	-0.0077491	0.00299548	0.704095	4:184796689	24	STOX2	0	NA	0.341	7	5	15	0	0	0
4:184802756:A:G	rs56248516	4	184802756	G	A	0.2769	0.7231	0.015	-0.00740683	0.00299553	0.695502	4:184796689	24	STOX2	0	NA	4.668	6	5	15	0	0	0
4:184802786:A:G	rs6841627	4	184802786	A	G	0.3011	0.6989	0.032	-0.00645427	0.00293189	0.619089	4:184796689	24	STOX2	0	NA	0.523	6	5	15	0	0	0
4:184804290:C:T	rs56027891	4	184804290	T	C	0.2784	0.7216	0.017	-0.00727261	0.00299856	0.689652	4:184796689	24	STOX2	0	NA	11.4	6	5	15	0	0	0
4:184804671:A:G	rs7696644	4	184804671	A	G	0.2784	0.7216	0.015	-0.00738986	0.00299586	0.689652	4:184796689	24	STOX2	0	NA	0.085	7	5	15	0	0	0
4:184804760:C:T	rs7696503	4	184804760	T	C	0.2784	0.7216	0.015	-0.0073856	0.00299691	0.689652	4:184796689	24	STOX2	0	NA	1.33	7	5	15	0	0	0
4:187014548:C:T	rs73025962	4	187014548	C	T	0.1649	0.8351	3.4e-06	-0.0154504	0.00331226	1	rs73025962	25	TLR3	5324	intergenic	4.634	5	1	15	0	0	0
5:8594985:A:G	rs191549712	5	8594985	G	A	0.02194	0.97806	0.00026	-0.0422052	0.0116011	0.715818	rs114082964	26	MTND6P2	23707	intergenic	1.513	6	9	15	0	0	0
5:8600804:A:T	rs541407985	5	8600804	T	A	0.02194	0.97806	0.00023	-0.0428601	0.0116666	0.715818	rs114082964	26	MTND6P2	17888	intergenic	0.344	NA	5	15	0	0	0
5:8647759:A:G	rs114082964	5	8647759	A	G	0.0174	0.9826	1.9e-06	-0.0608826	0.0127632	1	rs114082964	26	RP11-417J1.3	27336	intergenic	0.904	7	5	15	0	0	0
5:9639311:C:T	rs149187155	5	9639311	T	C	0.01513	0.98487	1.9e-06	-0.0665319	0.0139821	1	rs149187155	27	CTD-2001E22.1:TAS2R1	00:00:00	ncRNA_intronic	2.541	6	9	15	0	0	0
5:9678142:A:T	rs139384762	5	9678142	A	T	0.01967	0.98033	0.008	-0.0232545	0.00888008	0.684772	rs149187155	27	TAS2R1:CTD-2143L24.1	00:00:00	ncRNA_intronic	8.722	7	9	15	0	0	0
5:9679034:C:T	rs147573314	5	9679034	T	C	0.01967	0.98033	0.008	-0.0232545	0.00888008	0.684772	rs149187155	27	TAS2R1:CTD-2143L24.1	00:00:00	ncRNA_intronic	9.502	7	9	15	0	0	0
5:20536559:C:T	rs150744905	5	20536559	C	T	0.0121	0.9879	7.5e-07	-0.0494761	0.0100123	0.951443	rs190082809	28	CDH18	0	intronic	8.779	5	7	15	0	0	0
5:20542546:C:T	rs146793722	5	20542546	T	C	0.0121	0.9879	4.5e-07	-0.0515325	0.0102095	0.951443	rs190082809	28	CDH18	0	intronic	1.184	7	14	15	0	0	0
5:20544251:C:G	rs145849737	5	20544251	G	C	0.0121	0.9879	4.1e-07	-0.0519218	0.0102547	0.951443	rs190082809	28	CDH18	0	intronic	6.367	7	9	15	0	0	0
5:20549408:A:G	rs150340920	5	20549408	G	A	0.0121	0.9879	5.2e-07	-0.0513238	0.0102281	0.951443	rs190082809	28	CDH18	0	intronic	2.975	6	9	15	0	0	0
5:20552942:A:G	rs190082809	5	20552942	A	G	0.01286	0.98714	2.8e-07	-0.0528927	0.010277	1	rs190082809	28	CDH18	0	intronic	2.039	7	9	15	0	0	0
5:29352019:A:G	rs140104268	5	29352019	A	G	0.02345	0.97655	9.5e-06	-0.0394368	0.00890009	1	rs140104268	29	CTD-2010I22.2	28383	intergenic	0.909	6	9	15	0	0	0
5:29364159:G:T	rs150698566	5	29364159	T	G	0.0174	0.9826	0.00011	-0.0376535	0.00971243	0.732632	rs140104268	29	CTD-2010I22.2	16243	intergenic	1.969	7	9	15	0	0	0
5:29381074:A:T	5:29381074	5	29381074	T	A	0.01664	0.98336	0.00023	-0.0355026	0.00964102	0.73363	rs148438089	29	CTD-2010I22.2	0	ncRNA_intronic	0.634	6	9	15	0	0	0
5:29387697:C:T	rs145870829	5	29387697	T	C	0.01664	0.98336	0.00021	-0.0364876	0.00985179	0.73363	rs148438089	29	CTD-2010I22.2	0	ncRNA_intronic	2.087	5	9	15	0	0	0
5:29388094:A:G	rs147714366	5	29388094	A	G	0.01664	0.98336	0.00021	-0.0364876	0.00985179	0.73363	rs148438089	29	CTD-2010I22.2	0	ncRNA_intronic	1.521	6	9	15	0	0	0
5:29410215:C:T	rs142671006	5	29410215	C	T	0.01664	0.98336	0.00013	-0.0353748	0.00923717	0.73363	rs148438089	29	CTD-2010I22.2	14126	intergenic	1.164	7	5	15	0	0	0
5:29428814:C:T	rs186600511	5	29428814	C	T	0.01664	0.98336	2e-05	-0.0398191	0.00933622	0.808439	rs148438089	29	CTD-2010I22.2	32725	intergenic	7.513	7	9	15	0	0	0
5:29434149:G:T	rs148438089	5	29434149	G	T	0.02042	0.97958	3.3e-06	-0.0420711	0.00904978	1	rs148438089	29	CTD-2010I22.2	38060	intergenic	2.984	6	9	15	0	0	0
5:29450041:A:T	rs139233099	5	29450041	A	T	0.01664	0.98336	1.6e-05	-0.0405907	0.00941697	0.808439	rs148438089	29	CTD-2010I22.2	53952	intergenic	5.106	6	15	15	0	0	0
5:29452031:A:G	rs149905080	5	29452031	A	G	0.01664	0.98336	1.3e-05	-0.0396268	0.00908647	0.808439	rs148438089	29	CTD-2010I22.2	55942	intergenic	1.632	5	15	15	0	0	0
5:29462374:A:C	rs10940801	5	29462374	C	A	0.0174	0.9826	4.3e-05	-0.0373284	0.0091168	0.771506	rs148438089	29	CTD-2010I22.2	66285	intergenic	1.017	6	5	15	0	0	0
5:29467119:C:T	rs137925202	5	29467119	T	C	0.0174	0.9826	5.7e-05	-0.0381061	0.0094655	0.69998	rs148438089	29	CTD-2010I22.2	71030	intergenic	3.122	6	7	15	0	0	0
5:51379161:G:T	rs4374711	5	51379161	T	G	0.01967	0.98033	3.4e-05	-0.0509552	0.0122135	0.717383	rs7447978	30	CTD-2203A3.1	2339	intergenic	1.556	6	9	15	0	0	0
5:51431023:C:T	rs111299856	5	51431023	C	T	0.02194	0.97806	3.8e-05	-0.0487838	0.0117801	0.873226	rs7447978	30	CTD-2203A3.1	54201	intergenic	1.83	6	9	15	0	0	0
5:51431051:A:G	rs112290812	5	51431051	A	G	0.02194	0.97806	3.8e-05	-0.0487838	0.0117801	0.873226	rs7447978	30	CTD-2203A3.1	54229	intergenic	3.632	6	9	15	0	0	0
5:51431381:C:T	5:51431381	5	51431381	T	C	0.02421	0.97579	1.6e-05	-0.0506673	0.0116766	0.844966	rs7447978	30	CTD-2203A3.1	54559	intergenic	0.374	6	9	15	0	0	0
5:51433545:C:T	rs111840572	5	51433545	C	T	0.02269	0.97731	5.3e-05	-0.0480637	0.0118152	0.904769	rs7447978	30	CTD-2203A3.1	56723	intergenic	4.182	7	5	15	0	0	0
5:51434643:A:G	rs73094439	5	51434643	G	A	0.02269	0.97731	5.3e-05	-0.0480637	0.0118152	0.904769	rs7447978	30	CTD-2203A3.1	57821	intergenic	3.432	7	5	15	0	0	0
5:51445846:A:T	rs73094452	5	51445846	T	A	0.02269	0.97731	2.7e-05	-0.0498568	0.0118202	0.904769	rs7447978	30	CTD-2203A3.1	69024	intergenic	0.036	7	7	15	0	0	0
5:51455605:A:G	rs146127610	5	51455605	A	G	0.02269	0.97731	4.1e-05	-0.0490979	0.0119165	0.904769	rs7447978	30	CTD-2203A3.1	78783	intergenic	0.145	6	14	15	0	0	0
5:51458341:A:G	rs7447978	5	51458341	G	A	0.02496	0.97504	2.9e-06	-0.04729	0.0100436	1	rs7447978	30	CTD-2203A3.1	81519	intergenic	0.111	6	14	15	0	0	0
5:51480252:A:G	rs73094464	5	51480252	G	A	0.01967	0.98033	5.4e-05	-0.0506477	0.0124273	0.779194	rs7447978	30	RPS17P11	98148	intergenic	3.089	6	9	15	0	0	0
5:165600829:A:G	5:165600829	5	165600829	A	G	0.04463	0.95537	1.1e-06	-0.0398173	0.00814253	0.746082	rs11959032	31	AC122720.1	14303	intergenic	0.1	6	9	15	0	0	0
5:165602212:C:T	rs11959032	5	165602212	T	C	0.03328	0.96672	3.3e-07	-0.0477468	0.00933215	1	rs11959032	31	AC122720.1	15686	intergenic	5.742	6	9	15	0	0	0
5:165603117:A:C	rs77635228	5	165603117	A	C	0.03328	0.96672	9e-07	-0.047077	0.00955352	1	rs11959032	31	AC122720.1	16591	intergenic	3.531	7	9	15	0	0	0
5:165606659:A:C	rs11956975	5	165606659	C	A	0.03631	0.96369	1.6e-06	-0.0434239	0.00906808	0.918307	rs11959032	31	AC122720.1	20133	intergenic	0.247	6	9	15	0	0	0
5:165614455:A:T	rs116437926	5	165614455	A	T	0.03631	0.96369	6.5e-07	-0.0461663	0.00929147	0.918307	rs11959032	31	AC122720.1	27929	intergenic	1.662	7	9	15	0	0	0
5:165635675:A:G	rs116150510	5	165635675	A	G	0.02421	0.97579	0.00012	-0.0432534	0.0113702	0.635485	rs11959032	31	AC122720.1	49149	intergenic	7.518	7	5	15	0	0	0
5:180083479:A:G	rs112967731	5	180083479	A	G	0.09002	0.90998	5.7e-07	-0.0231208	0.00463629	1	rs112967731	32	FLT4	6854	intergenic	0.668	7	13	14	0	0	0
5:180107753:C:T	rs139379075	5	180107753	C	T	0.03555	0.96445	2e-06	-0.0306672	0.00651805	1	rs139379075	32	RP11-451H23.3	4012	intergenic	1.038	5	5	14	0	0	0
6:228467:A:C	rs77809451	6	228467	C	A	0.03404	0.96596	1.8e-06	0.0348683	0.00721607	1	rs77809451	33	RP3-416J7.5	22074	intergenic	3.585	3a	5	15	0	0	0
6:56206053:C:G	rs144664021	6	56206053	G	C	0.0416	0.9584	1.4e-06	-0.034571	0.0071022	1	rs144664021	34	COL21A1	0	intronic	0.317	6	5	15	0	0	0
6:160301253:C:T	rs144005840	6	160301253	T	C	0.01589	0.98411	9.3e-06	0.043548	0.00995144	1	rs144005840	35	RP1-249F5.3	18964	intergenic	6.17	5	5	15	0	0	0
7:4779605:A:T	rs140285788	7	4779605	T	A	0.01589	0.98411	3.4e-07	0.0561794	0.0110215	1	rs140285788	36	FOXK1	0	intronic	0.788	2b	2	5	0	0	0
7:119716952:A:C	rs1807249	7	119716952	A	C	0.2806	0.7194	0.00039	0.00996709	0.00282293	0.807522	rs62477416	37	RP4-742N3.1	64117	intergenic	0.347	NA	14	15	0	0	0
7:119724537:A:G	rs62477416	7	119724537	A	G	0.2564	0.7436	3.6e-06	0.0133893	0.00289673	1	rs62477416	37	RP4-742N3.1	56532	intergenic	1.074	5	14	15	0	0	0
7:119729649:C:T	rs6968486	7	119729649	T	C	0.2504	0.7496	2.8e-05	0.0122402	0.00293492	0.859751	rs62477416	37	RP4-742N3.1	51420	intergenic	3.741	6	5	15	0	0	0
7:119733809:C:T	rs1344081	7	119733809	C	T	0.2549	0.7451	2.3e-05	0.0122728	0.00291674	0.916991	rs62477416	37	RP4-742N3.1	47260	intergenic	2.776	NA	14	15	0	0	0
7:119734551:C:T	rs62477419	7	119734551	T	C	0.2549	0.7451	3.8e-05	0.011881	0.00289748	0.916991	rs62477416	37	RP4-742N3.1	46518	intergenic	2.95	7	14	15	0	0	0
7:119738421:A:G	rs62477422	7	119738421	A	G	0.2549	0.7451	2.2e-05	0.012322	0.00291871	0.916991	rs62477416	37	RP4-742N3.1	42648	intergenic	1.396	7	9	15	0	0	0
7:119739663:C:T	rs62477423	7	119739663	C	T	0.2579	0.7421	1.3e-05	0.0126408	0.00290977	0.902249	rs62477416	37	RP4-742N3.1	41406	intergenic	0.967	6	9	15	0	0	0
7:144285299:C:T	rs115672412	7	144285299	C	T	0.0121	0.9879	0.00054	0.0466714	0.013436	0.886133	rs145770279	38	TPK1	0	intronic	2.547	7	5	15	0	0	0
7:144286529:A:T	rs149473502	7	144286529	A	T	0.01437	0.98563	0.00043	0.047042	0.0132847	0.741854	rs145770279	38	TPK1	0	intronic	7.057	7	5	15	0	0	0
7:144288768:C:T	rs145770279	7	144288768	T	C	0.01362	0.98638	5.6e-06	0.0459448	0.0100705	1	rs145770279	38	TPK1	0	intronic	4.616	7	4	15	0	0	0
7:144289026:C:T	rs145338876	7	144289026	T	C	0.01286	0.98714	0.00084	0.0455773	0.0135894	0.942978	rs145770279	38	TPK1	0	intronic	3.625	6	4	15	0	0	0
7:144293354:C:T	rs115457131	7	144293354	C	T	0.01286	0.98714	0.0016	0.0430547	0.0136185	0.942978	rs145770279	38	TPK1	0	intronic	12.34	6	5	15	0	0	0
7:144297239:A:G	rs142370594	7	144297239	G	A	0.01286	0.98714	0.0013	0.0439878	0.0136538	0.942978	rs145770279	38	TPK1	0	intronic	2.874	7	5	15	0	0	0
7:144301546:C:T	rs112889989	7	144301546	C	T	0.01362	0.98638	7e-06	0.0458209	0.0101675	1	rs145770279	38	TPK1	0	intronic	1.387	7	5	15	0	0	0
7:144305505:A:G	rs143463369	7	144305505	G	A	0.01362	0.98638	0.00084	0.0455262	0.0136191	1	rs145770279	38	TPK1	0	intronic	1.203	6	5	15	0	0	0
7:144317853:A:G	rs147517105	7	144317853	A	G	0.01362	0.98638	0.0002	0.0418169	0.0111953	1	rs145770279	38	TPK1	0	intronic	0.179	7	4	15	0	0	0
7:144319163:C:T	rs142774468	7	144319163	T	C	0.01362	0.98638	0.00026	0.040428	0.0110518	1	rs145770279	38	TPK1	0	intronic	1.741	5	4	15	0	0	0
7:146811989:C:T	rs144855336	7	146811989	T	C	0.03101	0.96899	0.00017	-0.0329362	0.00886093	0.922808	rs138986592	39	CNTNAP2	0	intronic	4.905	5	9	15	0	0	0
7:146817258:A:G	rs115862626	7	146817258	A	G	0.03177	0.96823	2.2e-05	-0.0374971	0.00891384	0.949314	rs138986592	39	CNTNAP2	0	intronic	0.238	6	9	15	0	0	0
7:146825950:A:G	rs142524655	7	146825950	G	A	0.03177	0.96823	1e-05	-0.03946	0.00900112	0.949314	rs138986592	39	CNTNAP2	0	intronic	3.815	7	9	15	0	0	0
7:146836278:A:C	rs143749894	7	146836278	A	C	0.03101	0.96899	6.6e-06	-0.0401924	0.00898519	0.974039	rs138986592	39	CNTNAP2	0	intronic	3.581	6	7	15	0	0	0
7:146841361:A:G	rs77392732	7	146841361	A	G	0.03101	0.96899	6.4e-06	-0.0402054	0.00897683	0.974039	rs138986592	39	CNTNAP2	0	intronic	8.669	7	5	15	0	0	0
7:146846115:C:T	rs115427748	7	146846115	T	C	0.03101	0.96899	9.1e-06	-0.0390794	0.00885812	0.974039	rs138986592	39	CNTNAP2	0	intronic	3.53	7	9	15	0	0	0
7:146854448:A:G	rs138986592	7	146854448	A	G	0.03026	0.96974	4.3e-06	-0.0408956	0.00895316	1	rs138986592	39	CNTNAP2	0	intronic	1.385	7	9	15	0	0	0
7:146888554:C:T	rs115698431	7	146888554	T	C	0.03026	0.96974	6.1e-06	-0.0408121	0.0090816	1	rs138986592	39	CNTNAP2	0	intronic	4.162	5	9	15	0	0	0
7:146900528:A:T	rs182992344	7	146900528	A	T	0.03026	0.96974	1.2e-05	-0.0404953	0.00930331	1	rs138986592	39	CNTNAP2	0	intronic	5.286	7	9	15	0	0	0
8:19082122:A:G	rs112095618	8	19082122	G	A	0.1505	0.8495	0.0056	-0.00929228	0.00340335	0.638097	rs6986924	40	RP11-1080G15.1	0	ncRNA_intronic	0.332	6	5	15	0	0	0
8:19083619:C:T	rs7001264	8	19083619	C	T	0.1089	0.8911	7.2e-06	-0.0175308	0.00396548	0.897498	rs6986924	40	RP11-1080G15.1	0	ncRNA_intronic	1.178	5	5	15	0	0	0
8:19084522:C:T	rs6982723	8	19084522	T	C	0.1074	0.8926	5.5e-06	-0.0183036	0.00408597	0.92816	rs6986924	40	RP11-1080G15.1	0	ncRNA_intronic	7.569	5	5	15	0	0	0
8:19084784:C:G	rs6986924	8	19084784	G	C	0.1006	0.8994	4.4e-06	-0.0188591	0.00415772	1	rs6986924	40	RP11-1080G15.1	0	ncRNA_intronic	2.454	5	5	15	0	0	0
8:19085423:C:G	rs56989673	8	19085423	G	C	0.08699	0.91301	2.4e-05	-0.0193515	0.00466009	0.849743	rs6986924	40	RP11-1080G15.1	0	ncRNA_intronic	3.233	5	5	15	0	0	0
8:19085946:C:T	rs73588843	8	19085946	T	C	0.1089	0.8911	7.5e-06	-0.0176776	0.00400364	0.897498	rs6986924	40	RP11-1080G15.1	0	ncRNA_intronic	6.122	3a	5	15	0	0	0
8:33195722:C:T	rs2176334	8	33195722	C	T	0.07413	0.92587	0.00012	-0.0201424	0.00525545	0.750893	rs80140480	41	RNU6-528P	662	upstream	0.553	7	9	15	0	0	0
8:33196532:G:T	rs114897484	8	33196532	G	T	0.07413	0.92587	0.00013	-0.0198696	0.00521718	0.750893	rs80140480	41	RNU6-528P	47	downstream	0.597	6	9	15	0	0	0
8:33203265:A:G	rs144459550	8	33203265	A	G	0.06581	0.93419	0.00032	-0.0197704	0.00551584	0.819472	rs80140480	41	RNU6-528P	6780	intergenic	2.468	5	5	15	0	0	0
8:33208340:G:T	rs76944392	8	33208340	G	T	0.08699	0.91301	0.00011	-0.0178421	0.00462018	0.873414	rs80140480	41	RP11-722E23.2	10020	intergenic	2.518	6	5	15	0	0	0
8:33209487:A:T	rs77654013	8	33209487	A	T	0.08396	0.91604	2.1e-05	-0.0217198	0.00510416	0.90787	rs80140480	41	RP11-722E23.2	8873	intergenic	0.144	4	5	15	0	0	0
8:33211908:C:T	rs80140480	8	33211908	T	C	0.07867	0.92133	5.6e-06	-0.0242098	0.00532408	1	rs80140480	41	RP11-722E23.2	6452	intergenic	NA	5	1	15	0	0	0
8:33220048:A:G	rs147456585	8	33220048	A	G	0.05825	0.94175	0.022	-0.0130513	0.00573198	0.718893	rs80140480	41	RP11-722E23.2	1114	intergenic	2.36	7	5	15	0	0	0
8:33222425:A:G	rs140286272	8	33222425	A	G	0.05673	0.94327	0.024	-0.0130768	0.00582355	0.677318	rs80140480	41	RP11-722E23.2	3491	intergenic	0.037	7	5	15	0	0	0
8:33230142:G:T	rs115787522	8	33230142	T	G	0.0711	0.9289	0.02	-0.0112825	0.00483741	0.75093	rs80140480	41	FUT10	0	exonic	15.93	6	4	4	1	0	0
8:33233450:A:G	rs142123025	8	33233450	A	G	0.08094	0.91906	0.049	-0.00886783	0.00449193	0.631186	rs80140480	41	FUT10	0	intronic	0.038	7	4	5	0	0	0
8:33236100:C:T	rs114081462	8	33236100	T	C	0.08094	0.91906	0.045	-0.00904234	0.00450697	0.631186	rs80140480	41	FUT10	0	intronic	3.624	6	4	5	0	0	0
8:33236957:A:C	rs116645557	8	33236957	A	C	0.08169	0.91831	0.044	-0.00908327	0.00450721	0.624234	rs80140480	41	FUT10	0	intronic	0.968	6	4	5	0	0	0
8:33239191:A:G	rs116071677	8	33239191	G	A	0.08094	0.91906	0.022	-0.0102498	0.00443736	0.631186	rs80140480	41	FUT10	0	intronic	2.923	5	5	5	0	0	0
8:95046638:G:T	rs4735264	8	95046638	G	T	0.3684	0.6316	2.7e-06	0.0123369	0.00263104	1	rs4735264	42	AC105081.1	60486	intergenic	2.862	7	5	15	0	0	0
8:95047412:A:G	rs4735265	8	95047412	G	A	0.3336	0.6664	2e-06	0.0129399	0.00272689	0.821791	rs7011186	42	AC105081.1	61260	intergenic	0.381	3a	2	15	0	0	0
8:95054399:G:T	rs10109944	8	95054399	G	T	0.3245	0.6755	1.3e-06	0.0133051	0.00275008	1	rs7011186	42	KB-1184D12.1	55592	intergenic	0.344	6	5	15	0	0	0
8:95055153:C:T	rs7011186	8	95055153	T	C	0.3245	0.6755	1.2e-06	0.0133274	0.00274491	1	rs7011186	42	KB-1184D12.1	54838	intergenic	9.487	5	5	15	0	0	0
8:95088353:C:G	rs7831012	8	95088353	G	C	0.2012	0.7988	0.00021	-0.0122698	0.00330135	0.687158	rs114684581	42	KB-1184D12.1	21638	intergenic	10.9	7	5	15	0	0	0
8:95089653:A:C	rs7006922	8	95089653	A	C	0.1838	0.8162	4.5e-05	-0.0137877	0.00337932	0.781367	rs114684581	42	KB-1184D12.1	20338	intergenic	0.922	6	5	15	0	0	0
8:95092061:A:C	rs7013153	8	95092061	C	A	0.1649	0.8351	6.5e-07	-0.0177653	0.00357815	0.937324	rs114684581	42	KB-1184D12.1	17930	intergenic	2.763	2b	2	15	0	0	0
8:95093235:A:C	rs2978143	8	95093235	A	C	0.2322	0.7678	0.01	-0.00782536	0.00304867	0.605607	rs114684581	42	KB-1184D12.1	16756	intergenic	3.167	NA	5	15	0	0	0
8:95096074:C:T	rs116136580	8	95096074	C	T	0.1679	0.8321	2.3e-06	-0.0165987	0.00352227	0.97193	rs114684581	42	KB-1184D12.1	13917	intergenic	3.713	5	5	15	0	0	0
8:95096603:A:G	rs6997440	8	95096603	G	A	0.2284	0.7716	0.0077	0.00806645	0.00304384	0.646458	rs114684581	42	KB-1184D12.1	13388	intergenic	2.056	7	5	15	0	0	0
8:95100302:C:T	rs114684581	8	95100302	C	T	0.1657	0.8343	3.4e-07	-0.0181291	0.00356541	1	rs114684581	42	KB-1184D12.1	9689	intergenic	4.477	6	5	15	0	0	0
8:95103497:C:T	rs2446849	8	95103497	T	C	0.2284	0.7716	0.0056	0.00839445	0.00304212	0.646458	rs114684581	42	KB-1184D12.1	6494	intergenic	3.069	NA	5	15	0	0	0
8:95110744:A:G	rs7006531	8	95110744	G	A	0.1838	0.8162	1.5e-06	-0.0163091	0.00339462	0.86615	rs114684581	42	KB-1184D12.1	0	ncRNA_intronic	2.931	7	5	15	0	0	0
8:95111326:C:T	rs2446833	8	95111326	C	T	0.2186	0.7814	0.0032	0.00902322	0.00307026	0.681724	rs114684581	42	KB-1184D12.1	0	ncRNA_intronic	1.078	NA	5	15	0	0	0
8:95117183:A:C	rs115115468	8	95117183	A	C	0.1044	0.8956	3.6e-06	-0.020116	0.0043188	0.847161	rs76688800	42	KB-1184D12.1	632	upstream	2.169	7	5	15	0	0	0
8:95117389:C:T	rs115888294	8	95117389	C	T	0.1044	0.8956	1.4e-06	-0.0211284	0.00435522	0.847161	rs76688800	42	KB-1184D12.1	838	upstream	13.04	6	5	15	1	0	0
8:95119934:A:T	rs28458347	8	95119934	T	A	0.1036	0.8964	4.2e-06	-0.0199814	0.00432234	0.856427	rs76688800	42	KB-1184D12.1	3383	intergenic	1.702	7	5	15	0	0	0
8:95120892:C:T	rs114837267	8	95120892	T	C	0.1036	0.8964	9e-06	-0.0191385	0.00428912	0.856427	rs76688800	42	KB-1184D12.1	4341	intergenic	5.154	4	5	15	0	0	0
8:95121617:A:T	rs28602319	8	95121617	T	A	0.1036	0.8964	3.7e-06	-0.0201126	0.00432404	0.856427	rs76688800	42	KB-1184D12.1	5066	intergenic	5.593	5	5	15	0	0	0
8:95125450:A:G	rs76688800	8	95125450	G	A	0.1029	0.8971	1.2e-06	-0.021477	0.00439716	1	rs76688800	42	KB-1184D12.1	8899	intergenic	3.264	5	5	15	0	0	0
8:95129431:A:G	rs61655079	8	95129431	G	A	0.1059	0.8941	0.0001	-0.0166724	0.00428815	0.676175	rs76688800	42	CDH17	9967	intergenic	4.955	5	5	15	0	0	0
8:95130895:A:C	rs56953547	8	95130895	A	C	0.1014	0.8986	6.2e-05	-0.0175709	0.00437736	0.695429	rs76688800	42	CDH17	8503	intergenic	3.252	5	5	15	0	0	0
8:95133280:A:G	rs114958554	8	95133280	A	G	0.06203	0.93797	2.4e-06	-0.025228	0.00534158	0.756091	rs80279158	42	CDH17	6118	intergenic	3.295	5	5	15	0	0	0
8:95137990:A:C	rs114066982	8	95137990	C	A	0.1331	0.8669	0.0003	-0.0143315	0.0039626	0.68013	rs76688800	42	CDH17	1408	intergenic	0.065	7	5	15	0	0	0
8:95154405:C:G	rs75662439	8	95154405	G	C	0.1188	0.8812	4.7e-05	-0.0168967	0.00413998	0.782626	rs76688800	42	CDH17	0	intronic	4.712	3a	4	15	0	0	0
8:95156516:A:G	rs115777969	8	95156516	A	G	0.06203	0.93797	3.2e-06	-0.0248266	0.00532593	0.756091	rs80279158	42	CDH17	0	intronic	0.139	7	4	15	0	0	0
8:95161777:C:G	8:95161777	8	95161777	C	G	0.1195	0.8805	0.00031	-0.0147687	0.00409525	0.66885	rs76688800	42	CDH17	0	intronic	0.854	7	4	15	0	0	0
8:95172027:C:T	rs74579651	8	95172027	T	C	0.09758	0.90242	0.00013	-0.0164629	0.00431723	0.711771	rs80279158	42	CDH17	0	intronic	1.911	7	4	15	0	0	0
8:95174434:C:T	rs80279158	8	95174434	T	C	0.07262	0.92738	6.9e-07	-0.0243258	0.00493865	1	rs80279158	42	CDH17	0	intronic	10.15	7	4	15	0	0	0
8:95191404:A:G	rs115126094	8	95191404	A	G	0.05673	0.94327	0.0022	-0.016082	0.00520932	0.610759	rs80279158	42	CDH17	0	intronic	0.064	4	4	15	0	0	0
8:141141821:A:G	rs80205060	8	141141821	A	G	0.01891	0.98109	3.4e-06	-0.0389115	0.00842562	1	rs80205060	43	TRAPPC9	0	intronic	1.138	7	5	15	0	0	0
8:141158326:A:C	rs76327565	8	141158326	A	C	0.01891	0.98109	3.8e-06	-0.0393026	0.00855573	1	rs80205060	43	TRAPPC9	0	intronic	2.517	5	5	15	0	0	0
8:141179118:A:G	rs150045705	8	141179118	A	G	0.01891	0.98109	2.1e-05	-0.0362928	0.00857932	0.76612	rs80205060	43	TRAPPC9	0	intronic	1.021	7	5	15	0	0	0
9:12250387:A:G	9:12250387	9	12250387	A	G	0.2095	0.7905	7.8e-06	0.0141313	0.00315322	0.640067	rs10960551	44	RP11-71E22.1	36932	intergenic	2.539	6	9	15	0	0	0
9:12250978:A:G	rs72501416	9	12250978	A	G	0.2095	0.7905	7e-06	0.0142011	0.00315356	0.640067	rs10960551	44	RP11-71E22.1	36341	intergenic	0.196	7	9	15	0	0	0
9:12251731:A:G	rs7874437	9	12251731	A	G	0.2141	0.7859	2.8e-05	0.012925	0.00308193	0.649004	rs10960551	44	RP11-71E22.1	35588	intergenic	10.44	7	9	15	0	0	0
9:12258683:C:T	rs73410797	9	12258683	T	C	0.2171	0.7829	3.3e-06	0.0144533	0.00309977	0.702923	rs10960551	44	RP11-71E22.1	28636	intergenic	0.266	7	9	15	0	0	0
9:12260408:C:G	rs10960551	9	12260408	G	C	0.2738	0.7262	1.2e-07	0.015121	0.00286094	1	rs10960551	44	RP11-71E22.1	26911	intergenic	0.445	6	9	15	0	0	0
9:12261388:A:G	rs4740521	9	12261388	A	G	0.2738	0.7262	2.7e-07	0.014542	0.00283738	0.976857	rs10960551	44	RP11-71E22.1	25931	intergenic	0.764	7	9	15	0	0	0
9:12261951:C:T	rs10960553	9	12261951	C	T	0.2897	0.7103	1e-06	0.0135639	0.00278645	0.902455	rs10960551	44	RP11-71E22.1	25368	intergenic	1.836	6	9	15	0	0	0
9:12262289:G:T	rs1984212	9	12262289	T	G	0.289	0.711	1.1e-06	0.0135328	0.00278653	0.905429	rs10960551	44	RP11-71E22.1	25030	intergenic	1.029	7	9	15	0	0	0
9:12263033:A:G	rs10115549	9	12263033	A	G	0.2821	0.7179	1.4e-06	0.0134042	0.00279134	0.86246	rs10960551	44	RP11-71E22.1	24286	intergenic	2.762	7	9	15	0	0	0
9:12263593:A:G	rs10756353	9	12263593	A	G	0.2905	0.7095	1.3e-06	0.0133837	0.00277952	0.906277	rs10960551	44	RP11-71E22.1	23726	intergenic	3.337	7	9	15	0	0	0
9:12264458:C:G	rs1416577	9	12264458	C	G	0.2905	0.7095	9.5e-07	0.01355	0.00277738	0.906277	rs10960551	44	RP11-71E22.1	22861	intergenic	0.124	6	9	15	0	0	0
9:12265747:G:T	rs872046	9	12265747	T	G	0.3018	0.6982	2.1e-05	0.0116114	0.00274105	0.812521	rs10960551	44	RP11-71E22.1	21572	intergenic	19.67	6	9	15	0	0	0
9:29353106:A:G	rs12345717	9	29353106	G	A	0.04085	0.95915	0.00089	-0.0285594	0.00882342	0.864313	rs12344220	45	RP11-373A6.1	98681	intergenic	3.327	7	14	15	0	0	0
9:29364485:A:G	rs12344220	9	29364485	A	G	0.0469	0.9531	1.6e-06	-0.0333964	0.00709163	1	rs12344220	45	RP11-373A6.1	110060	intergenic	2.191	7	5	15	0	0	0
9:29403839:G:T	rs10969123	9	29403839	G	T	0.04463	0.95537	4.4e-06	-0.0321954	0.00714884	0.880441	rs12344220	45	RP11-373A6.1	149414	intergenic	2.979	7	5	15	0	0	0
9:29445403:C:G	rs12351106	9	29445403	G	C	0.04085	0.95915	0.013	-0.0220004	0.00916329	0.733892	rs12344220	45	RP11-373A6.1	190978	intergenic	0.647	6	5	15	0	0	0
9:29466154:C:T	rs116102008	9	29466154	C	T	0.04085	0.95915	0.019	-0.020973	0.00924263	0.733892	rs12344220	45	RP11-48L13.1	170329	intergenic	6.042	6	15	15	0	0	0
9:84520255:A:G	rs116626680	9	84520255	A	G	0.05522	0.94478	6.6e-06	0.0248288	0.00553052	0.918559	rs116098305	46	SPATA31D5P	8096	intergenic	0.272	6	5	15	0	0	0
9:84526827:C:G	rs116098305	9	84526827	C	G	0.05068	0.94932	1.9e-06	0.026526	0.00559257	1	rs116098305	46	SPATA31D5P	1524	intergenic	0.098	5	2	15	0	0	0
9:84530498:A:C	rs114426311	9	84530498	A	C	0.08396	0.91604	1.1e-06	0.023704	0.00487259	1	rs114426311	46	SPATA31D5P	0	ncRNA_exonic	0.967	5	7	15	0	0	0
9:93865035:A:G	rs74744940	9	93865035	A	G	0.02345	0.97655	7.4e-07	-0.0506609	0.0102616	1	rs74744940	47	RP11-305L7.1	2203	intergenic	7.855	7	5	15	0	0	0
9:93890190:A:G	rs139334969	9	93890190	G	A	0.0348	0.9652	0.0033	-0.0240583	0.00824578	0.657867	rs74744940	47	RP11-305L7.6:RP11-305L7.3	00:00:00	ncRNA_intronic	1.988	3a	1	15	0	0	0
10:21448367:C:G	rs2768664	10	21448367	G	C	0.4902	0.5098	2.9e-06	0.0120759	0.00256369	1	rs2768664	48	NEBL	0	intronic	0.874	5	2	15	0	0	0
10:126236309:C:T	rs572890238	10	126236309	T	C	0.01135	0.98865	2.1e-06	-0.0553965	0.0116785	1	rs572890238	49	LHPP	0	intronic	0.046	NA	2	15	0	0	0
11:5319457:A:G	rs185705069	11	5319457	G	A	0.01059	0.98941	8.4e-06	-0.0274184	0.00628844	1	rs185705069	50	HBG2:HBE1	00:00:00	intronic	0.165	4	5	15	0	0	0
11:17756351:G:T	rs150102860	11	17756351	T	G	0.2428	0.7572	9.2e-06	-0.0131906	0.00294538	1	rs150102860	51	KCNC1	7	upstream	4.359	4	1	1	0	0	0
11:19436836:A:G	rs11828124	11	19436836	G	A	0.1142	0.8858	0.0011	-0.0125831	0.00388677	0.6203	rs10500847	52	NAV2	0	intronic	8.688	7	5	15	0	0	0
11:19436887:A:T	rs113412802	11	19436887	A	T	0.1089	0.8911	0.00027	-0.0144994	0.00400735	0.659234	rs10500847	52	NAV2	0	intronic	5.408	6	5	15	0	0	0
11:19437276:C:T	rs139882763	11	19437276	T	C	0.1089	0.8911	0.00028	-0.0142862	0.00396595	0.659234	rs10500847	52	NAV2	0	intronic	1.243	7	5	15	0	0	0
11:19438265:A:G	rs114967948	11	19438265	A	G	0.1142	0.8858	0.0014	-0.0121847	0.00385626	0.6203	rs10500847	52	NAV2	0	intronic	0.713	7	5	15	0	0	0
11:19438743:A:G	rs112243881	11	19438743	A	G	0.1142	0.8858	0.0012	-0.0123912	0.00386047	0.6203	rs10500847	52	NAV2	0	intronic	0.106	7	5	15	0	0	0
11:19439164:A:C	rs146685964	11	19439164	C	A	0.1089	0.8911	0.00029	-0.014437	0.00400623	0.659234	rs10500847	52	NAV2	0	intronic	0.538	7	5	15	0	0	0
11:19439557:C:T	rs11825424	11	19439557	T	C	0.1142	0.8858	0.0011	-0.012556	0.00388371	0.6203	rs10500847	52	NAV2	0	intronic	2.555	7	5	15	0	0	0
11:19442022:A:G	rs74430887	11	19442022	G	A	0.1142	0.8858	0.0019	-0.011717	0.00379893	0.6203	rs10500847	52	NAV2	0	intronic	3.535	7	5	15	0	0	0
11:19446115:C:T	rs114884683	11	19446115	T	C	0.1082	0.8918	0.00026	-0.0143148	0.00395008	0.665246	rs10500847	52	NAV2	0	intronic	0.292	6	5	15	0	0	0
11:19451505:A:T	rs10500847	11	19451505	A	T	0.1483	0.8517	8e-06	-0.0160216	0.00361282	1	rs10500847	52	NAV2	0	intronic	7.819	7	5	14	0	0	0
11:29848290:A:T	rs10835592	11	29848290	T	A	0.04009	0.95991	0.00027	0.0206037	0.00573393	0.634417	11:29872433	53	CTD-3138F19.1	0	ncRNA_intronic	2.319	5	9	15	0	0	0
11:29848888:C:T	rs72876999	11	29848888	T	C	0.04085	0.95915	0.00026	0.0206042	0.00573103	0.646897	11:29872433	53	CTD-3138F19.1	0	ncRNA_intronic	0.485	7	9	15	0	0	0
11:29855828:C:T	rs118078748	11	29855828	T	C	0.04085	0.95915	0.00048	0.0195726	0.00569757	0.646897	11:29872433	53	CTD-3138F19.1	0	ncRNA_intronic	2.94	7	9	15	0	0	0
11:29872433:A:G	11:29872433	11	29872433	A	G	0.05976	0.94024	3e-06	0.0250236	0.0054251	1	11:29872433	53	CTD-3138F19.1	0	ncRNA_intronic	0.009	6	9	15	0	0	0
11:29877687:C:T	rs11030848	11	29877687	T	C	0.04236	0.95764	0.00094	0.0179212	0.00551547	0.646043	11:29872433	53	CTD-3138F19.1	0	ncRNA_intronic	3.741	6	9	15	0	0	0
11:115432725:C:T	rs1460911	11	115432725	T	C	0.497	0.503	3.8e-05	-0.0108006	0.0026274	0.721044	rs922205	54	RP11-136I14.4	16041	intergenic	3.909	NA	7	15	0	0	0
11:115436343:A:T	rs34286126	11	115436343	A	T	0.4871	0.5129	8.5e-06	-0.0116184	0.00261262	0.769745	rs922205	54	RP11-136I14.4	12423	intergenic	2.498	6	5	15	0	0	0
11:115438254:A:G	rs1460910	11	115438254	A	G	0.4705	0.5295	0.0001	-0.0101721	0.0026194	0.699923	rs922205	54	RP11-136I14.4	10512	intergenic	11.76	NA	7	15	0	0	0
11:115438385:C:G	rs1563901	11	115438385	C	G	0.4924	0.5076	1.7e-05	-0.0112397	0.00262172	0.767044	rs922205	54	RP11-136I14.4	10381	intergenic	0.261	7	7	15	0	0	0
11:115438421:C:T	rs1563900	11	115438421	C	T	0.4924	0.5076	1.7e-05	-0.0112397	0.00262172	0.767044	rs922205	54	RP11-136I14.4	10345	intergenic	1.952	NA	5	15	0	0	0
11:115438446:A:G	11:115438446	11	115438446	A	G	0.4924	0.5076	1.7e-05	-0.0112446	0.00262178	0.767044	rs922205	54	RP11-136I14.4	10320	intergenic	1.205	NA	5	15	0	0	0
11:115438625:A:G	rs979219	11	115438625	A	G	0.4652	0.5348	6.4e-05	-0.0104944	0.00262463	0.694945	rs922205	54	RP11-136I14.4	10141	intergenic	10.77	NA	5	15	0	0	0
11:115439298:A:G	rs2446882	11	115439298	A	G	0.4939	0.5061	1.2e-05	-0.0114435	0.00262485	0.768352	rs922205	54	RP11-136I14.4	9468	intergenic	1.383	NA	5	15	0	0	0
11:115439446:A:G	rs2515300	11	115439446	G	A	0.4924	0.5076	1.9e-05	-0.0111443	0.00261536	0.767044	rs922205	54	RP11-136I14.4	9320	intergenic	17.87	NA	5	15	0	1	0
11:115440826:C:T	rs2515298	11	115440826	C	T	0.4932	0.5068	1.9e-05	-0.0111443	0.00261536	0.75946	rs922205	54	RP11-136I14.4	7940	intergenic	2.797	NA	5	15	0	0	0
11:115443044:A:G	rs2446887	11	115443044	A	G	0.4932	0.5068	1.9e-05	-0.0111561	0.00261634	0.76536	rs922205	54	RP11-136I14.4	5722	intergenic	10.67	NA	5	15	0	0	0
11:115443781:C:T	rs2513631	11	115443781	T	C	0.4917	0.5083	1.8e-05	-0.0111922	0.0026182	0.764071	rs922205	54	RP11-136I14.4	4985	intergenic	NA	NA	7	15	0	0	0
11:115444386:C:T	rs3133434	11	115444386	C	T	0.4652	0.5348	7.7e-05	-0.0103718	0.00262592	0.690768	rs922205	54	RP11-136I14.4	4380	intergenic	1.168	6	5	15	0	0	0
11:115444776:C:G	rs11215602	11	115444776	C	G	0.4652	0.5348	5.2e-05	-0.0106095	0.00262263	0.694945	rs922205	54	RP11-136I14.4	3990	intergenic	0.151	6	5	15	0	0	0
11:115444814:A:T	rs12417490	11	115444814	A	T	0.4932	0.5068	1.4e-05	-0.0113341	0.00262069	0.764106	rs922205	54	RP11-136I14.4	3952	intergenic	2.147	7	5	15	0	0	0
11:115445169:C:T	rs2515322	11	115445169	C	T	0.4652	0.5348	5.1e-05	-0.0106122	0.00262236	0.694945	rs922205	54	RP11-136I14.4	3597	intergenic	0.067	7	5	15	0	0	0
11:115446096:A:G	rs2515324	11	115446096	A	G	0.4871	0.5129	6.9e-07	-0.0129592	0.00261711	0.788942	rs922205	54	RP11-136I14.4	2670	intergenic	3.332	6	5	15	0	0	0
11:115446460:A:T	rs2515326	11	115446460	A	T	0.4871	0.5129	7.2e-07	-0.0129334	0.00261697	0.788942	rs922205	54	RP11-136I14.4	2306	intergenic	3.434	5	5	15	0	0	0
11:115447446:A:G	rs2446890	11	115447446	G	A	0.4879	0.5121	8.1e-07	-0.0128714	0.00261719	0.787141	rs922205	54	RP11-136I14.4	1320	intergenic	0.819	5	5	15	0	0	0
11:115448115:A:T	rs922205	11	115448115	A	T	0.4395	0.5605	4.6e-07	-0.0134808	0.00267337	1	rs922205	54	RP11-136I14.4	651	upstream	2.749	5	5	15	0	0	0
12:6614099:C:T	rs115180363	12	6614099	T	C	0.04387	0.95613	0.0012	0.0258522	0.00797268	0.611042	12:6648447	55	NCAPD2	0	intronic	7.769	5	4	5	0	0	0
12:6624366:C:T	rs115529723	12	6624366	C	T	0.04387	0.95613	0.001	0.0265053	0.00806358	0.611042	12:6648447	55	NCAPD2	0	intronic	2.827	6	4	4	0	0	0
12:6629883:C:G	rs77207431	12	6629883	G	C	0.04387	0.95613	0.00087	0.0269005	0.00808301	0.611042	12:6648447	55	NCAPD2	0	intronic	4.726	7	4	4	0	0	0
12:6648447:A:G	12:6648447	12	6648447	A	G	0.02874	0.97126	5.9e-06	0.0395701	0.00877127	1	12:6648447	55	IFFO1	0	UTR3	0.433	4	1	5	0	0	0
12:6651419:C:G	rs116013640	12	6651419	C	G	0.0416	0.9584	0.00037	0.0275169	0.00774609	0.634028	12:6648447	55	IFFO1	0	intronic	0.527	4	2	5	0	0	0
12:12821504:A:G	rs77121802	12	12821504	G	A	0.02421	0.97579	0.04	-0.0150295	0.00721393	0.870204	rs10492237	56	GPR19	0	intronic	3.221	7	5	15	0	0	0
12:12839118:C:T	rs74475305	12	12839118	C	T	0.02572	0.97428	0.0098	-0.0160235	0.00613116	0.825564	rs10492237	56	GPR19	0	intronic	4.572	7	5	15	0	0	0
12:12841735:C:T	rs7964189	12	12841735	T	C	0.02496	0.97504	8.9e-05	-0.0291157	0.00736594	0.904769	rs10492237	56	GPR19	0	intronic	11.19	5	5	15	0	0	0
12:12845381:C:G	rs11610142	12	12845381	C	G	0.02496	0.97504	0.0011	-0.0220087	0.00667689	0.904769	rs10492237	56	GPR19	0	intronic	0.33	5	5	15	0	0	0
12:12847990:A:G	rs17820421	12	12847990	G	A	0.02496	0.97504	0.001	-0.0221905	0.00668285	0.904769	rs10492237	56	GPR19	0	intronic	13.3	7	5	15	1	1	0
12:12849241:A:G	rs17758597	12	12849241	G	A	0.02496	0.97504	0.00084	-0.0229508	0.00680899	0.904769	rs10492237	56	GPR19	99	upstream	7.251	4	1	1	0	0	0
12:12850368:C:T	rs10492237	12	12850368	C	T	0.02269	0.97731	8.6e-06	-0.0362502	0.0081093	1	rs10492237	56	GPR19	1226	intergenic	13.68	2b	1	15	1	1	0
12:12868701:C:T	rs35756741	12	12868701	T	C	0.02118	0.97882	8.8e-05	-0.0302844	0.00766445	0.930384	rs10492237	56	CDKN1B	0	intergenic	10.25	NA	1	2	0	0	0
12:85790005:G:T	rs7973247	12	85790005	T	G	0.01891	0.98109	9.6e-06	-0.0402135	0.0090752	1	rs7973247	57	RP11-408B11.2	53314	intergenic	0.104	7	5	15	0	0	0
12:87920538:A:G	rs78801338	12	87920538	A	G	0.01135	0.98865	1.8e-06	-0.0587425	0.0122517	1	rs78801338	58	RP11-248E9.1	219805	intergenic	0.131	7	5	15	0	0	0
12:87920841:A:G	rs187914804	12	87920841	A	G	0.01135	0.98865	1.6e-06	-0.0588027	0.0122148	1	rs187914804	58	RP11-248E9.1	219502	intergenic	1.86	7	5	15	0	0	0
12:87924029:A:G	rs149377438	12	87924029	A	G	0.01135	0.98865	1.2e-06	-0.0579472	0.0118661	1	rs149377438	58	RP11-248E9.1	216314	intergenic	1.479	6	9	15	0	0	0
12:87926928:A:C	rs186712159	12	87926928	A	C	0.0121	0.9879	3.1e-06	-0.055168	0.0117699	1	rs186712159	58	RP11-248E9.1	213415	intergenic	0.995	7	5	15	0	0	0
12:87933967:C:T	rs80207518	12	87933967	C	T	0.01059	0.98941	7.2e-06	-0.0519626	0.0115203	1	rs80207518	58	RP11-248E9.1	206376	intergenic	0.813	5	9	15	0	0	0
12:87941901:C:T	rs144573706	12	87941901	C	T	0.01135	0.98865	6e-06	-0.0523211	0.0114999	1	rs144573706	58	RP11-248E9.1	198442	intergenic	2.57	7	9	15	0	0	0
12:87948248:C:T	rs115994322	12	87948248	T	C	0.01059	0.98941	5.4e-06	-0.0526923	0.0115198	1	rs115994322	58	RP11-248E9.1	192095	intergenic	NA	5	9	15	0	0	0
12:87954893:A:G	rs144216948	12	87954893	G	A	0.01135	0.98865	5.4e-06	-0.0526923	0.0115198	1	rs144216948	58	RP11-248E9.1	185450	intergenic	8.002	7	15	15	0	0	0
12:87961399:C:T	12:87961399	12	87961399	C	T	0.01135	0.98865	3.9e-06	-0.0534847	0.011529	1	12:87961399	58	RP11-248E9.1	178944	intergenic	1.931	5	5	15	0	0	0
12:87966152:C:T	rs138347710	12	87966152	C	T	0.01135	0.98865	3.8e-06	-0.0538081	0.0115802	1	rs138347710	58	RP11-248E9.1	174191	intergenic	1.481	6	7	15	0	0	0
12:87970665:C:T	rs146791699	12	87970665	C	T	0.01135	0.98865	3.4e-06	-0.0539436	0.0115678	1	rs146791699	58	RP11-248E9.1	169678	intergenic	2.094	5	5	15	0	0	0
12:96788318:G:T	rs75362303	12	96788318	G	T	0.03253	0.96747	9.3e-06	-0.0301766	0.00670261	1	rs75362303	59	CDK17	0	intronic	2.335	4	4	5	0	0	0
12:104946297:C:T	rs146513466	12	104946297	C	T	0.07791	0.92209	7e-06	-0.0216447	0.00484779	1	rs146513466	60	CHST11	0	intronic	1.087	5	4	15	0	0	0
12:104957537:G:T	rs76960947	12	104957537	G	T	0.06127	0.93873	4.1e-06	-0.0276241	0.00599237	1	rs76960947	60	CHST11	0	intronic	3.369	6	4	15	0	0	0
12:128572443:A:G	rs114943940	12	128572443	A	G	0.04312	0.95688	4.7e-06	-0.0280534	0.00611867	1	rs114943940	61	RP13-653N12.1	0	ncRNA_intronic	1.575	7	5	15	0	0	0
13:30163715:G:T	rs280916	13	30163715	G	T	0.1399	0.8601	1.1e-05	-0.0161235	0.00370455	1	rs280912	62	SLC7A1	0	intronic	1.206	NA	2	5	0	0	0
13:30163773:C:T	rs280915	13	30163773	T	C	0.1399	0.8601	1.1e-05	-0.0161124	0.0037047	1	rs280912	62	SLC7A1	0	intronic	5.198	NA	2	5	0	0	0
13:30163902:C:T	rs478688	13	30163902	T	C	0.1399	0.8601	1.1e-05	-0.0161235	0.00370455	1	rs280912	62	SLC7A1	0	intronic	3.285	NA	2	7	0	0	0
13:30164018:A:C	rs280913	13	30164018	A	C	0.1399	0.8601	8.4e-06	-0.0162716	0.00369827	1	rs280912	62	SLC7A1	0	intronic	5.972	NA	2	7	0	0	0
13:30164359:C:T	rs280912	13	30164359	T	C	0.1399	0.8601	8.2e-06	-0.0162931	0.00369832	1	rs280912	62	SLC7A1	0	intronic	5.661	NA	2	7	0	0	0
13:30164477:A:C	rs76628627	13	30164477	A	C	0.1399	0.8601	8.4e-06	-0.0162716	0.00369827	1	rs280912	62	SLC7A1	0	intronic	4.224	3a	3	5	0	0	0
14:20645190:A:G	rs114897734	14	20645190	G	A	0.01664	0.98336	2.2e-06	-0.0520277	0.0109363	1	rs114897734	63	OR11G1P	2157	intergenic	2.751	5	2	15	0	0	0
15:71063645:A:G	rs28721525	15	71063645	A	G	0.1301	0.8699	0.00055	-0.013557	0.00395131	0.63368	rs148254309	64	RP11-138H8.3	0	ncRNA_intronic	10.31	5	5	15	0	0	0
15:71070823:C:T	rs76386851	15	71070823	T	C	0.1301	0.8699	0.00064	-0.0131543	0.00386992	0.63368	rs148254309	64	RP11-138H8.3	0	ncRNA_intronic	2.505	4	2	15	0	0	0
15:71070987:A:G	rs79556011	15	71070987	A	G	0.1301	0.8699	0.00048	-0.0137618	0.0039651	0.63368	rs148254309	64	RP11-138H8.3	0	ncRNA_intronic	7.874	3a	2	15	0	0	0
15:71072017:C:T	rs113079723	15	71072017	T	C	0.1301	0.8699	0.00064	-0.0131503	0.00386987	0.63368	rs148254309	64	RP11-138H8.3	809	upstream	1.795	6	5	15	0	0	0
15:71072135:C:T	rs113448943	15	71072135	T	C	0.1301	0.8699	0.00064	-0.0131503	0.00386987	0.63368	rs148254309	64	RP11-138H8.3	927	upstream	4.688	5	5	15	0	0	0
15:71072537:A:G	rs149668906	15	71072537	A	G	0.1301	0.8699	0.00064	-0.0131503	0.00386987	0.63368	rs148254309	64	RP11-138H8.3	1329	intergenic	2.094	6	5	15	0	0	0
15:71072890:C:T	rs76007627	15	71072890	T	C	0.1301	0.8699	0.00065	-0.0131356	0.00386931	0.63368	rs148254309	64	RP11-138H8.3	1682	intergenic	4.356	7	5	15	0	0	0
15:71073284:A:G	rs79343999	15	71073284	G	A	0.1301	0.8699	0.00063	-0.0132833	0.00390227	0.63368	rs148254309	64	RP11-138H8.3	2076	intergenic	4.948	6	5	15	0	0	0
15:71073472:C:G	rs149480737	15	71073472	G	C	0.1301	0.8699	0.00049	-0.0137406	0.00396464	0.63368	rs148254309	64	RP11-138H8.3	2264	intergenic	0.043	7	5	15	0	0	0
15:71073635:A:G	rs148638754	15	71073635	A	G	0.1301	0.8699	0.00043	-0.013897	0.00397736	0.63368	rs148254309	64	RP11-138H8.3	2427	intergenic	2.996	2b	2	15	0	0	0
15:71077030:C:T	rs7167807	15	71077030	T	C	0.1301	0.8699	0.00051	-0.0136144	0.00394689	0.63368	rs148254309	64	RP11-138H8.3	5822	intergenic	0.731	5	5	15	0	0	0
15:71079166:C:T	rs148254309	15	71079166	T	C	0.08623	0.91377	8.1e-06	-0.0237746	0.00541396	1	rs148254309	64	RP11-138H8.4	4185	intergenic	0.328	5	5	15	0	0	0
15:71086380:C:G	rs78544404	15	71086380	G	C	0.1082	0.8918	0.00093	-0.0143004	0.00440102	0.720317	rs148254309	64	RP11-138H8.4	2554	intergenic	5.862	4	2	15	0	0	0
15:71086602:A:T	rs77839728	15	71086602	T	A	0.1021	0.8979	0.00045	-0.015477	0.0044769	0.750678	rs148254309	64	RPL29P30	2333	intergenic	7.069	5	2	15	0	0	0
15:71088277:A:G	rs150840489	15	71088277	A	G	0.03707	0.96293	2.4e-09	-0.0510393	0.00862355	1	rs150840489	64	RPL29P30	658	downstream	0.069	7	5	15	0	0	0
15:71090167:A:G	rs28412078	15	71090167	A	G	0.09228	0.90772	2.5e-05	-0.0217771	0.00525224	0.827059	rs148254309	64	RPL29P30	0	ncRNA_intronic	0.03	5	5	15	0	0	0
15:71096636:C:T	rs150770815	15	71096636	T	C	0.09455	0.90545	3.7e-05	-0.020915	0.00515506	0.805103	rs148254309	64	RPL29P30	1608	intergenic	0.11	6	5	15	0	0	0
15:71098722:C:G	rs78193262	15	71098722	C	G	0.1112	0.8888	3.2e-05	-0.0182327	0.00445651	0.672865	rs148254309	64	RPL29P30	3694	intergenic	9.055	6	5	15	0	0	0
15:71102972:G:T	rs12385936	15	71102972	T	G	0.1082	0.8918	3.3e-05	-0.0185665	0.00453472	0.694573	rs148254309	64	RPL29P30	7944	intergenic	0.209	7	5	15	0	0	0
15:71110395:C:G	rs75065983	15	71110395	G	C	0.08094	0.91906	3.7e-05	-0.0226815	0.00559579	0.789953	rs148254309	64	RP11-138H8.7	11073	intergenic	0.064	7	5	15	0	0	0
15:71110701:A:G	15:71110701	15	71110701	A	G	0.09682	0.90318	0.00011	-0.0178725	0.00469997	0.661198	rs148254309	64	RP11-138H8.7	10767	intergenic	0.35	6	5	15	0	0	0
15:71116602:G:T	rs142273942	15	71116602	T	G	0.07867	0.92133	3.1e-05	-0.0230524	0.00563224	0.763016	rs148254309	64	RP11-138H8.7	4866	intergenic	3.233	6	5	15	0	0	0
15:71118634:C:T	rs143040484	15	71118634	T	C	0.09153	0.90847	6.4e-05	-0.0195013	0.00492352	0.731245	rs148254309	64	RP11-138H8.7	2834	intergenic	2.972	7	5	15	0	0	0
15:71149768:A:G	rs7162210	15	71149768	A	G	0.09002	0.90998	1.9e-05	-0.0231604	0.00548395	0.645727	rs148254309	64	LRRC49	0	intronic	3.678	7	2	7	0	0	0
15:71164408:A:G	rs183657345	15	71164408	G	A	0.0885	0.9115	3.9e-05	-0.0223204	0.00549115	0.643377	rs148254309	64	LRRC49	0	intronic	1.414	7	5	15	0	0	0
15:71165190:C:G	rs114357303	15	71165190	G	C	0.0885	0.9115	3.9e-05	-0.0223204	0.00549115	0.643377	rs148254309	64	LRRC49	0	intronic	7.517	7	5	15	0	0	0
15:71353779:C:T	rs114253766	15	71353779	T	C	0.04614	0.95386	2.7e-05	-0.0306913	0.00734391	1	rs78172571	64	RPL5P3	1660	intergenic	5.872	5	5	15	0	0	0
15:71399994:C:T	rs114639857	15	71399994	T	C	0.04614	0.95386	3.8e-06	-0.0363608	0.00792462	1	rs78172571	64	THSD4	0	intronic	12.95	5	5	15	1	0	1
15:71400424:A:G	rs78172571	15	71400424	A	G	0.04614	0.95386	3.8e-06	-0.0363879	0.00792468	1	rs78172571	64	THSD4	0	intronic	4.117	6	5	15	0	0	0
15:80827722:A:C	rs114251156	15	80827722	A	C	0.02042	0.97958	9.4e-05	-0.0318952	0.00814845	0.605509	rs141882243	65	ARNT2	0	intronic	1.692	5	4	15	0	0	0
15:80832031:C:T	rs143954636	15	80832031	T	C	0.02042	0.97958	9.5e-05	-0.0318564	0.00814642	0.605509	rs141882243	65	ARNT2	0	intronic	2.244	5	5	15	0	0	0
15:80835472:A:G	rs115285040	15	80835472	A	G	0.02042	0.97958	5.8e-05	-0.0325896	0.00808181	0.605509	rs141882243	65	ARNT2	0	intronic	0.212	7	4	15	0	0	0
15:80839389:A:G	rs137922164	15	80839389	A	G	0.02042	0.97958	9.8e-05	-0.0318427	0.00815636	0.605509	rs141882243	65	ARNT2	0	intronic	0.096	6	4	15	0	0	0
15:80840185:A:G	rs188490586	15	80840185	G	A	0.02042	0.97958	9.8e-05	-0.0318427	0.00815636	0.605509	rs141882243	65	ARNT2	0	intronic	3.295	7	2	15	0	0	0
15:80848312:A:T	rs141784055	15	80848312	A	T	0.04312	0.95688	1.2e-05	-0.0320624	0.00728767	0.635216	rs77298235	65	ARNT2:RP11-379K22.2	00:00:00	ncRNA_exonic	4.297	7	4	15	0	0	0
15:80850805:C:T	rs149042632	15	80850805	T	C	0.04085	0.95915	1e-05	-0.0324657	0.0073096	0.636141	rs77298235	65	ARNT2:RP11-379K22.2	00:00:00	ncRNA_intronic	1.485	6	4	15	0	0	0
15:80852328:G:T	rs77298235	15	80852328	T	G	0.03026	0.96974	6.4e-08	-0.0436932	0.00804104	1	rs77298235	65	ARNT2:RP11-379K22.2	00:00:00	ncRNA_intronic	1.248	5	4	15	0	0	0
15:80852338:C:T	rs76017996	15	80852338	C	T	0.06354	0.93646	5.3e-07	-0.0320932	0.00636632	1	rs76017996	65	ARNT2:RP11-379K22.2	00:00:00	ncRNA_intronic	0.709	5	4	15	0	0	0
15:80862113:A:G	rs137968635	15	80862113	G	A	0.02042	0.97958	1.3e-06	-0.0405849	0.00842989	0.928533	rs141882243	65	ARNT2	0	intronic	1.441	5	4	5	0	0	0
15:80866118:A:C	rs74382125	15	80866118	C	A	0.02723	0.97277	5.2e-06	-0.0387942	0.00855514	0.88317	rs12439123	65	ARNT2	0	intronic	0.038	5	4	5	0	0	0
15:80868824:A:G	rs12439123	15	80868824	A	G	0.03101	0.96899	2.5e-06	-0.0374895	0.00798675	1	rs12439123	65	ARNT2	0	intronic	1.813	7	4	15	0	0	0
15:80870520:A:T	rs115217816	15	80870520	T	A	0.02723	0.97277	4.5e-06	-0.0391368	0.0085752	0.88317	rs12439123	65	ARNT2	0	intronic	1.352	5	4	15	0	0	0
15:80878522:A:G	rs78156237	15	80878522	G	A	0.01891	0.98109	1.2e-06	-0.045044	0.00929013	1	rs141882243	65	ARNT2	0	intronic	1.343	2b	2	15	0	0	0
15:80882112:C:T	rs141882243	15	80882112	T	C	0.01891	0.98109	8.4e-07	-0.045688	0.00930409	1	rs141882243	65	ARNT2	0	intronic	4.803	7	4	15	0	0	0
15:80920771:C:G	rs115664164	15	80920771	C	G	0.01967	0.98033	1.5e-06	-0.0427138	0.00888801	0.820623	rs141882243	65	ARNT2	30492	intergenic	0.363	7	9	15	0	0	0
15:80928569:C:T	rs57570049	15	80928569	C	T	0.02572	0.97428	6.8e-06	-0.035113	0.00781813	1	rs57570049	65	RNU6-380P	27543	intergenic	5.16	5	2	15	0	0	0
15:80931163:A:G	rs79693196	15	80931163	G	A	0.02496	0.97504	1e-05	-0.0349741	0.00794826	0.97085	rs57570049	65	RNU6-380P	24949	intergenic	0.706	5	5	15	0	0	0
15:80931806:C:T	rs76257401	15	80931806	C	T	0.02496	0.97504	1.2e-05	-0.0346194	0.00792838	0.97085	rs57570049	65	RNU6-380P	24306	intergenic	2.302	7	5	15	0	0	0
15:80942545:A:G	rs115960740	15	80942545	A	G	0.01815	0.98185	3.9e-06	-0.040509	0.00878106	0.814486	rs141882243	65	RNU6-380P	13567	intergenic	2.989	6	5	15	0	0	0
15:80953707:G:T	rs191984363	15	80953707	G	T	0.01815	0.98185	1.4e-05	-0.037417	0.00861761	0.814486	rs141882243	65	RNU6-380P	2405	intergenic	0.146	6	5	15	0	0	0
15:80954129:C:T	rs79417922	15	80954129	T	C	0.01815	0.98185	1.1e-05	-0.0386537	0.00877823	0.814486	rs141882243	65	RNU6-380P	1983	intergenic	4.714	7	5	15	0	0	0
15:80954699:C:G	rs75249211	15	80954699	G	C	0.01815	0.98185	1.4e-05	-0.0374721	0.00861745	0.814486	rs141882243	65	RNU6-380P	1413	intergenic	3.156	3a	5	15	0	0	0
15:80960700:G:T	rs114305194	15	80960700	G	T	0.01815	0.98185	1e-05	-0.0380448	0.00862876	0.814486	rs141882243	65	RNU6-380P	4480	intergenic	5.712	4	5	15	0	0	0
15:80965599:G:T	rs114174008	15	80965599	G	T	0.01815	0.98185	9.2e-06	-0.0389842	0.00879603	0.814486	rs141882243	65	ABHD17C	6425	intergenic	5.133	6	5	15	0	0	0
15:80972154:C:T	rs75023075	15	80972154	T	C	0.0174	0.9826	7.6e-06	-0.0390433	0.00872228	0.776739	rs141882243	65	ABHD17C	0	intronic	4.817	4	2	15	0	0	0
15:97663530:A:G	rs1303773	15	97663530	A	G	0.3585	0.6415	4.3e-05	0.011328	0.00278148	0.677024	rs28362004	66	AC055873.1	28947	intergenic	10.06	NA	5	15	0	0	0
15:97665390:A:C	rs1112074	15	97665390	A	C	0.3585	0.6415	3e-05	0.0114551	0.00275254	0.681448	rs28362004	66	AC055873.1	30807	intergenic	0.183	6	5	15	0	0	0
15:97666441:C:G	rs1398964	15	97666441	C	G	0.3578	0.6422	5.6e-05	0.010888	0.00271265	0.679945	rs28362004	66	AC055873.1	31858	intergenic	0.381	5	5	15	0	0	0
15:97669522:A:C	rs28362004	15	97669522	A	C	0.4486	0.5514	2.3e-06	0.0122609	0.00260299	1	rs28362004	66	AC055873.1	34939	intergenic	0.348	5	5	15	0	0	0
16:15690120:C:T	rs116132984	16	15690120	C	T	0.08775	0.91225	3.8e-07	-0.0257464	0.00507119	1	rs116132984	67	C16orf45:KIAA0430	00:00:00	UTR3	15.59	5	4	4	1	0	0
16:15696130:C:T	rs115550393	16	15696130	T	C	0.059	0.941	0.0012	-0.0205446	0.00636649	0.667306	rs116132984	67	C16orf45:KIAA0430	00:00:00	intronic	6.795	6	4	4	0	0	0
16:15702760:A:C	rs80031383	16	15702760	A	C	0.059	0.941	0.00099	-0.0210845	0.00641425	0.667306	rs116132984	67	C16orf45:KIAA0430:CTB-193M12.1	00:00:00	ncRNA_intronic	4.192	7	4	4	0	0	0
16:15704299:C:T	rs75507808	16	15704299	T	C	0.059	0.941	0.00099	-0.0210845	0.00641425	0.667306	rs116132984	67	C16orf45:KIAA0430:CTB-193M12.1	00:00:00	ncRNA_exonic	3.009	5	4	4	0	0	0
16:25223837:A:G	rs58646300	16	25223837	G	A	0.2201	0.7799	3.8e-06	-0.0165658	0.00359648	1	rs58646300	68	AQP8	3214	intergenic	1.988	6	5	15	0	0	0
16:75442443:G:T	rs115798809	16	75442443	T	G	0.1241	0.8759	0.00032	0.013678	0.00380309	0.601383	rs148965025	69	CFDP1	0	intronic	0.491	7	4	5	0	0	0
16:75466155:A:G	rs111624020	16	75466155	A	G	0.1248	0.8752	0.00075	0.0127164	0.00377437	0.600493	rs148965025	69	CFDP1:RP11-77K12.1	00:00:00	intronic	5.854	7	1	5	0	0	0
16:75467782:A:G	rs76994178	16	75467782	A	G	0.1271	0.8729	0.00026	0.0137946	0.00378366	0.607276	rs148965025	69	RP11-77K12.1	0	intronic	4.646	2b	1	1	0	0	0
16:75470762:A:C	rs60181220	16	75470762	A	C	0.118	0.882	0.00033	0.0139949	0.00390222	0.688587	rs148965025	69	RP11-77K12.1	0	intronic	8.139	7	5	5	0	0	0
16:75476077:C:T	rs115025642	16	75476077	T	C	0.1241	0.8759	0.00077	0.0130249	0.00387063	0.764024	rs148965025	69	RP11-77K12.1	0	intronic	2.975	7	4	5	0	0	0
16:75497389:C:G	rs148965025	16	75497389	G	C	0.09985	0.90015	8.1e-06	0.0187211	0.00422206	1	rs148965025	69	RP11-77K12.1:TMEM170A	00:00:00	intronic	0.166	4	1	1	0	0	0
16:75518343:C:G	rs8047287	16	75518343	C	G	0.1006	0.8994	0.0057	0.0120875	0.00437679	0.715318	rs148965025	69	RP11-77K12.4:CHST6	00:00:00	ncRNA_intronic	0.234	5	2	15	0	0	0
17:10918749:C:T	rs8076865	17	10918749	T	C	0.0295	0.9705	9.5e-06	0.035571	0.00804865	1	rs8076865	70	AC005284.1	38355	intergenic	2.204	7	9	15	0	0	0
17:10924995:A:G	rs6503345	17	10924995	A	G	0.03177	0.96823	2.3e-05	0.0311345	0.00739331	0.924093	rs8076865	70	AC005284.1	32109	intergenic	1.361	7	9	15	0	0	0
17:31624795:A:G	rs115885483	17	31624795	G	A	0.02723	0.97277	1.1e-05	-0.0507494	0.0115263	0.719412	rs114366450	71	ASIC2	0	intronic	1.55	7	13	14	0	0	0
17:31635229:C:T	rs114153775	17	31635229	C	T	0.03858	0.96142	0.00014	-0.03217	0.0084396	0.957644	rs114366450	71	ASIC2	0	intronic	5.047	6	13	14	0	0	0
17:31636571:C:T	rs116481393	17	31636571	C	T	0.03782	0.96218	0.00018	-0.0316199	0.00842575	0.978399	rs114366450	71	ASIC2	0	intronic	2.478	6	5	14	0	0	0
17:31636573:C:G	rs114435532	17	31636573	G	C	0.0295	0.9705	0.00046	-0.0314075	0.00894821	0.740347	rs114366450	71	ASIC2	0	intronic	0.644	6	5	14	0	0	0
17:31636763:A:T	rs115785931	17	31636763	T	A	0.03782	0.96218	0.00018	-0.0316199	0.00842575	0.978399	rs114366450	71	ASIC2	0	intronic	0.624	7	5	14	0	0	0
17:31639162:G:T	rs114019355	17	31639162	G	T	0.03782	0.96218	0.00027	-0.0305195	0.00836183	0.978399	rs114366450	71	ASIC2	0	intronic	4.194	6	5	14	0	0	0
17:31646041:C:T	rs116271532	17	31646041	T	C	0.03782	0.96218	0.00018	-0.0314699	0.00839981	0.978399	rs114366450	71	ASIC2	0	intronic	0.31	7	13	14	0	0	0
17:31648906:G:T	rs114366450	17	31648906	T	G	0.03707	0.96293	1.5e-06	-0.0457461	0.00948898	1	rs114366450	71	ASIC2	0	intronic	1.804	6	7	14	0	0	0
17:31649423:A:G	rs116575740	17	31649423	A	G	0.03782	0.96218	0.00012	-0.0322038	0.00842006	0.978399	rs114366450	71	ASIC2	0	intronic	5.935	5	7	14	0	0	0
17:31651689:C:T	rs116102286	17	31651689	T	C	0.03782	0.96218	0.00013	-0.0321732	0.0084345	0.978399	rs114366450	71	ASIC2	0	intronic	4.156	7	5	14	0	0	0
17:31651747:A:G	rs115664114	17	31651747	G	A	0.03782	0.96218	0.00013	-0.0321732	0.0084345	0.978399	rs114366450	71	ASIC2	0	intronic	3.667	7	5	14	0	0	0
17:39162365:C:T	17:39162365	17	39162365	C	T	0.02572	0.97428	0.0052	0.0193921	0.00702359	0.680334	rs139177071	72	KRTAP3-4P	1352	intergenic	1.37	5	5	15	0	0	0
17:39305400:C:T	rs146159563	17	39305400	C	T	0.02269	0.97731	0.00042	0.0266009	0.00756917	0.771673	rs139177071	72	KRTAP4-5	0	UTR3	2.359	5	7	15	0	0	0
17:39325949:G:T	rs138008778	17	39325949	T	G	0.02572	0.97428	0.0055	0.0270559	0.00987504	0.722523	rs139177071	72	KRTAP4-3	1524	intergenic	1.522	7	5	15	0	0	0
17:39354348:A:G	rs143710842	17	39354348	A	G	0.0295	0.9705	2e-05	0.0304477	0.00715688	0.821286	rs139177071	72	KRTAP9-1	7456	intergenic	2.417	6	9	15	0	0	0
17:39432212:A:C	17:39432212	17	39432212	A	C	0.03026	0.96974	1.7e-05	0.0304392	0.007105	0.849852	rs139177071	72	KRTAP9-7	0	exonic	23.3	6	7	14	1	0	0
17:39446160:C:T	17:39446160	17	39446160	C	T	0.02421	0.97579	0.0032	0.0295535	0.0100968	0.717411	rs139177071	72	KRTAP9-10P	9097	intergenic	1.162	7	5	15	0	0	0
17:39465432:C:G	17:39465432	17	39465432	G	C	0.03026	0.96974	1.8e-05	0.0309956	0.00723873	0.849852	rs139177071	72	KRTAP16-1	0	exonic	0.305	5	1	14	0	0	0
17:39490930:A:G	17:39490930	17	39490930	A	G	0.03026	0.96974	1.7e-05	0.0310306	0.00723539	0.849852	rs139177071	72	AC003958.6	0	ncRNA_exonic	3.185	4	5	15	0	0	0
17:39537946:A:T	17:39537946	17	39537946	T	A	0.02496	0.97504	0.0021	0.0298	0.00974725	0.644242	rs139177071	72	KRT34	0	intronic	0.502	5	5	15	0	0	0
17:39553250:A:G	17:39553250	17	39553250	A	G	0.03101	0.96899	1.7e-05	0.0310451	0.00723565	0.828902	rs139177071	72	KRT31	0	intronic	14.57	5	2	15	1	0	1
17:39589202:A:C	rs145687292	17	39589202	A	C	0.02042	0.97958	0.001	0.0325349	0.00998556	0.798366	rs139177071	72	KRT38	3495	intergenic	2.524	6	13	15	0	0	0
17:39604273:C:T	rs139177071	17	39604273	T	C	0.02572	0.97428	7.8e-06	0.0327523	0.00735425	1	rs139177071	72	KRT43P	161	downstream	6.325	5	5	14	0	0	0
18:4541336:A:G	rs138710042	18	4541336	A	G	0.01891	0.98109	6e-05	-0.0375225	0.00928529	0.741341	rs76280984	73	RP11-183C12.1	81877	intergenic	1.5	6	5	15	0	0	0
18:4561546:C:T	rs12327032	18	4561546	C	T	0.02799	0.97201	2.1e-05	-0.0350571	0.00820831	0.91915	rs76280984	73	RP11-183C12.1	102087	intergenic	5.665	7	9	15	0	0	0
18:4571368:G:T	rs78749054	18	4571368	G	T	0.06051	0.93949	1e-05	-0.0231286	0.00520473	0.986567	18:4585498	73	RP11-183C12.1	111909	intergenic	3.941	7	9	15	0	0	0
18:4576610:G:T	rs76280984	18	4576610	T	G	0.02572	0.97428	7e-06	-0.0374554	0.00831174	1	rs76280984	73	RP11-183C12.1	117151	intergenic	0.574	7	9	15	0	0	0
18:4584861:A:G	rs79832271	18	4584861	G	A	0.05976	0.94024	7.5e-06	-0.0227923	0.005055	1	18:4585498	73	RP11-183C12.1	125402	intergenic	1.896	7	9	15	0	0	0
18:4585498:A:T	18:4585498	18	4585498	A	T	0.05976	0.94024	1e-06	-0.0258373	0.00526213	1	18:4585498	73	RP11-183C12.1	126039	intergenic	4.647	6	9	15	0	0	0
18:42894670:A:G	rs116658260	18	42894670	A	G	0.01059	0.98941	1.2e-06	-0.0604535	0.0124465	1	rs116658260	74	SLC14A2	0	intronic	3.464	7	5	15	0	0	0
18:71067017:A:C	rs6566726	18	71067017	A	C	0.0885	0.9115	7.2e-06	-0.0240265	0.00532116	1	rs6566726	75	CTD-2354A18.1	49903	intergenic	2.214	7	5	15	0	0	0
19:1322312:C:T	rs758147	19	1322312	C	T	0.06581	0.93419	7.4e-06	-0.0281974	0.00629716	1	rs1974565	76	MUM1:AC005330.2	00:00:00	ncRNA_intronic	1.619	5	5	14	0	0	0
19:1323292:C:T	rs1009662	19	1323292	C	T	0.05598	0.94402	0.00037	-0.0307415	0.00862023	0.854478	rs1974565	76	MUM1	0	intronic	0.649	NA	5	14	0	0	0
19:1323329:A:G	rs1009661	19	1323329	G	A	0.07186	0.92814	3.1e-05	-0.0257723	0.00618501	0.917111	rs1974565	76	MUM1	0	intronic	0.571	NA	5	14	0	0	0
19:1323931:A:G	rs1974565	19	1323931	G	A	0.06581	0.93419	2.2e-06	-0.0282218	0.00596375	1	rs1974565	76	MUM1	0	intronic	2.384	6	5	14	0	0	0
19:1326714:C:T	rs8111242	19	1326714	C	T	0.06127	0.93873	2.5e-06	-0.0294783	0.00626405	0.823958	rs1974565	76	MUM1	0	intronic	2.164	5	5	14	0	0	0
19:1326731:C:G	rs8107884	19	1326731	G	C	0.06127	0.93873	2.4e-06	-0.0294796	0.0062543	0.823958	rs1974565	76	MUM1	0	intronic	1.022	5	5	14	0	0	0
19:1327070:C:T	rs10405034	19	1327070	C	T	0.05825	0.94175	2.9e-06	-0.0295833	0.00632537	0.780433	rs1974565	76	MUM1	0	intronic	0.105	7	5	14	0	0	0
19:1327644:A:G	rs7258669	19	1327644	G	A	0.06127	0.93873	6.3e-06	-0.0271194	0.00601319	0.823958	rs1974565	76	MUM1	0	intronic	2.245	5	1	14	0	0	0
19:1327670:A:G	rs10424550	19	1327670	A	G	0.06127	0.93873	2.6e-06	-0.0284752	0.00606716	0.823958	rs1974565	76	MUM1	0	intronic	1.019	5	1	14	0	0	0
19:15195139:A:G	rs73006902	19	15195139	A	G	0.02345	0.97655	2e-05	0.0441487	0.0102904	0.967212	rs16980313	77	OR1I1	2651	intergenic	0.636	6	9	14	0	0	0
19:15197409:C:T	rs58756181	19	15197409	T	C	0.03328	0.96672	0.0024	0.0207548	0.00683459	0.713398	rs16980313	77	OR1I1	381	upstream	0.082	7	9	14	0	0	0
19:15197737:C:T	rs58719128	19	15197737	T	C	0.02421	0.97579	8.8e-06	0.045109	0.0100967	1	rs16980313	77	OR1I1	53	upstream	2.456	6	9	14	0	0	0
19:15198024:A:T	rs59166286	19	15198024	T	A	0.02421	0.97579	8.8e-06	0.045109	0.0100967	1	rs16980313	77	OR1I1	0	exonic	0.001	5	7	14	0	0	0
19:15198441:G:T	rs73008811	19	15198441	T	G	0.02421	0.97579	6.7e-06	0.0457675	0.010117	1	rs16980313	77	OR1I1	0	exonic	12.07	4	6	14	0	0	0
19:15198606:C:T	rs73008812	19	15198606	T	C	0.02421	0.97579	6.1e-06	0.0459616	0.0101185	1	rs16980313	77	OR1I1	0	exonic	25	5	5	14	1	1	0
19:15198751:C:T	rs16980312	19	15198751	C	T	0.02269	0.97731	9.6e-06	0.0460878	0.0103639	0.934529	rs16980313	77	OR1I1	0	exonic	18.52	7	5	14	1	1	0
19:15198851:A:T	rs16980313	19	15198851	T	A	0.02421	0.97579	4.6e-06	0.0477318	0.0103699	1	rs16980313	77	OR1I1	0	exonic	0.004	5	5	14	0	0	0
19:15199641:C:T	rs60904637	19	15199641	C	T	0.02648	0.97352	1.2e-05	0.0445465	0.0101132	0.909925	rs16980313	77	OR1I1	608	downstream	0.025	5	5	14	0	0	0
19:15200126:A:C	rs73008827	19	15200126	A	C	0.02421	0.97579	4.6e-06	0.0477318	0.0103699	1	rs16980313	77	OR1I1	1093	intergenic	7.689	5	5	14	0	0	0
19:15200498:A:T	rs73008829	19	15200498	T	A	0.02421	0.97579	4.6e-06	0.0477318	0.0103699	1	rs16980313	77	OR1I1	1465	intergenic	10.83	6	5	14	0	0	0
19:15200629:A:T	rs73008831	19	15200629	T	A	0.02421	0.97579	4.6e-06	0.0477318	0.0103699	1	rs16980313	77	OR1I1	1596	intergenic	1.338	7	5	14	0	0	0
19:15202269:A:G	rs112440927	19	15202269	A	G	0.02496	0.97504	1.6e-05	0.0413243	0.00955264	0.844966	rs16980313	77	OR1I1	3236	intergenic	1.649	6	5	14	0	0	0
19:15202427:A:G	rs113447160	19	15202427	A	G	0.02496	0.97504	5.8e-06	0.0444842	0.00975098	0.844966	rs16980313	77	OR1I1	3394	intergenic	4.131	6	5	14	0	0	0
19:15202944:C:T	rs59746284	19	15202944	C	T	0.02572	0.97428	6.8e-05	0.0387093	0.00965144	0.818625	rs16980313	77	OR1I1	3911	intergenic	0.252	3a	1	14	0	0	0
19:20128372:A:G	rs10405773	19	20128372	G	A	0.2186	0.7814	2.6e-06	-0.0151959	0.00321921	1	rs10405773	78	ZNF682	0	intronic	3.355	6	4	5	0	0	0
19:21892969:A:C	19:21892969	19	21892969	A	C	0.1293	0.8707	2.9e-06	-0.0190702	0.00415521	0.980453	19:21937453	79	RP11-420K14.3	0	ncRNA_exonic	6.512	4	9	15	0	0	0
19:21901192:A:G	19:21901192	19	21901192	A	G	0.1172	0.8828	1.1e-05	-0.0190208	0.0044121	0.902014	19:21937453	79	VN1R84P	1410	intergenic	0.403	7	5	15	0	0	0
19:21912334:A:G	rs141111647	19	21912334	G	A	0.1165	0.8835	1e-05	-0.0190464	0.00440133	0.895676	19:21937453	79	ZNF100	0	intronic	5.101	6	4	5	0	0	0
19:21937453:A:T	19:21937453	19	21937453	T	A	0.1271	0.8729	2.1e-06	-0.019241	0.00413505	1	19:21937453	79	ZNF100	0	intronic	5.791	7	4	5	0	0	0
19:21938925:A:T	rs115415221	19	21938925	A	T	0.1172	0.8828	1.4e-05	-0.0187807	0.00441112	0.915076	19:21937453	79	ZNF100	0	intronic	0.014	7	4	5	0	0	0
19:21954018:G:T	19:21954018	19	21954018	G	T	0.08094	0.91906	0.00018	-0.0180694	0.00494202	0.629375	19:21937453	79	RP11-420K14.8	0	ncRNA_intronic	1.339	6	9	15	0	0	0
19:21975624:C:T	19:21975624	19	21975624	C	T	0.1256	0.8744	4e-06	-0.018666	0.0041376	0.869392	19:21937453	79	RP11-420K14.8	0	ncRNA_intronic	3.366	NA	9	15	0	0	0
19:21983964:G:T	19:21983964	19	21983964	T	G	0.1384	0.8616	9.9e-06	-0.0169367	0.00391794	0.781688	19:21937453	79	RP11-420K14.7	0	ncRNA_exonic	1.509	6	8	9	0	0	0
19:21984031:C:T	19:21984031	19	21984031	C	T	0.1392	0.8608	1.3e-05	-0.0167209	0.00391446	0.797679	19:21937453	79	RP11-420K14.7	0	ncRNA_exonic	0.604	6	8	9	0	0	0
19:21986365:A:G	19:21986365	19	21986365	A	G	0.1377	0.8623	1.3e-05	-0.016629	0.00389607	0.784983	19:21937453	79	ZNF43	1386	intergenic	5.514	5	5	9	0	0	0
19:21991663:A:G	19:21991663	19	21991663	G	A	0.1392	0.8608	1.3e-05	-0.016566	0.00389047	0.797679	19:21937453	79	ZNF43	0	exonic	0.054	5	1	8	0	0	0
19:21994352:A:C	rs8111812	19	21994352	C	A	0.1384	0.8616	1.4e-05	-0.016424	0.00386754	0.779931	19:21937453	79	ZNF43	0	intronic	0.355	6	4	8	0	0	0
19:21994386:A:T	rs8100594	19	21994386	T	A	0.1377	0.8623	3.9e-05	-0.0156099	0.00388599	0.784983	19:21937453	79	ZNF43	0	intronic	0.651	6	4	8	0	0	0
19:21996939:A:C	rs7247976	19	21996939	C	A	0.1399	0.8601	4.3e-05	-0.015436	0.00386373	0.792618	19:21937453	79	ZNF43	0	intronic	1.488	6	4	8	0	0	0
19:22001166:C:G	rs7250566	19	22001166	C	G	0.1399	0.8601	4.7e-05	-0.0153439	0.00386422	0.792618	19:21937453	79	ZNF43	0	intronic	NA	7	4	8	0	0	0
19:22008201:C:T	rs112483493	19	22008201	C	T	0.1384	0.8616	4.1e-05	-0.0154773	0.00386381	0.779931	19:21937453	79	ZNF43	0	intronic	9.114	7	3	5	0	0	0
19:22009760:A:G	rs113806144	19	22009760	A	G	0.1384	0.8616	0.00017	-0.0142189	0.00387671	0.779931	19:21937453	79	ZNF43:CTD-2607J13.1	00:00:00	ncRNA_exonic	10.89	7	4	5	0	0	0
19:22010612:C:T	rs111262227	19	22010612	T	C	0.1384	0.8616	0.00017	-0.0142189	0.00387671	0.779931	19:21937453	79	ZNF43	0	intronic	3.601	7	4	5	0	0	0
19:22014487:C:T	rs113057057	19	22014487	T	C	0.1384	0.8616	0.00016	-0.0142291	0.0038771	0.779931	19:21937453	79	ZNF43	0	intronic	5.592	7	5	5	0	0	0
19:22017691:C:G	rs11880004	19	22017691	C	G	0.1392	0.8608	0.00028	-0.0137559	0.00389196	0.797679	19:21937453	79	ZNF43	0	intronic	0.063	6	1	5	0	0	0
19:22019153:C:G	rs111879306	19	22019153	G	C	0.1392	0.8608	0.00028	-0.0137559	0.00389196	0.797679	19:21937453	79	ZNF43	0	intronic	6.862	2b	1	1	0	0	0
19:22025062:G:T	rs11882852	19	22025062	G	T	0.1384	0.8616	3.4e-05	-0.015686	0.00387539	0.791318	19:21937453	79	ZNF43	0	intronic	10.07	7	4	4	0	0	0
19:22027481:C:T	rs61439061	19	22027481	C	T	0.1399	0.8601	3e-05	-0.0158287	0.00388497	0.794332	19:21937453	79	ZNF43	0	intronic	9.064	7	4	4	0	0	0
19:22028560:A:T	rs11881809	19	22028560	A	T	0.1392	0.8608	3.6e-05	-0.0156155	0.00387511	0.797679	19:21937453	79	ZNF43	0	intronic	11.51	7	4	4	0	0	0
19:22029700:A:G	rs11879721	19	22029700	A	G	0.1377	0.8623	2.6e-05	-0.0158702	0.00387006	0.784983	19:21937453	79	ZNF43	0	intronic	6.247	7	4	5	0	0	0
19:22030236:A:C	rs34388517	19	22030236	A	C	0.1377	0.8623	3e-05	-0.0157637	0.00387337	0.784983	19:21937453	79	ZNF43	0	intronic	8.119	6	4	5	0	0	0
19:22032222:A:G	rs139888333	19	22032222	A	G	0.1331	0.8669	4e-05	-0.0159738	0.00397573	0.747506	19:21937453	79	ZNF43	0	intronic	4.628	7	4	5	0	0	0
19:22033346:A:G	rs111576368	19	22033346	A	G	0.1331	0.8669	4e-05	-0.0159738	0.00397573	0.747506	19:21937453	79	ZNF43	0	intronic	8.295	7	2	5	0	0	0
19:22034100:C:T	rs113227845	19	22034100	T	C	0.1331	0.8669	3.6e-05	-0.0161336	0.0039924	0.747506	19:21937453	79	ZNF43	0	intronic	2.738	7	1	1	0	0	0
19:22034275:C:G	rs111526336	19	22034275	C	G	0.1339	0.8661	3.6e-05	-0.0161295	0.00399245	0.744361	19:21937453	79	ZNF43	0	intronic	1.295	7	1	1	0	0	0
19:22037976:C:G	rs111308237	19	22037976	G	C	0.1339	0.8661	1.9e-05	-0.0167816	0.00401274	0.742483	19:21937453	79	ZNF43	3048	intergenic	1.872	7	5	15	0	0	0
19:22040292:G:T	rs112980352	19	22040292	G	T	0.1415	0.8585	4e-05	-0.0160235	0.0039851	0.705511	19:21937453	79	ZNF43	5364	intergenic	0.92	5	5	15	0	0	0
19:54785863:A:C	19:54785863	19	54785863	A	C	0.05522	0.94478	8.4e-06	-0.0231323	0.00526586	1	19:54785863	80	MIR4752	100	upstream	3.245	5	2	14	0	0	0
