# Supplementary material for: Genetic associations with carotid intima-media thickness link to atherosclerosis biology with sex-differences in sub-Saharan Africans
Source: Research Square preprint supplement (doi:10.21203/rs.3.rs-147838/v1), 2021-01-22
Supplement: Supplementary file 12 [file 674f0bae3c371ddb65bf94c0.xlsx]

## Sheet: genes
ensg	symbol	chr	start	end	strand	type	entrezID	HUGO	pLI	ncRVIS	posMapSNPs	posMapMaxCADD	eqtlMapSNPs	eqtlMapminP	eqtlMapminQ	eqtlMapts	eqtlDirection	ciMap	ciMapts	minGwasP	IndSigSNPs	GenomicLocus
ENSG00000085662	AKR1B1	7	134127102	134144036	-1	protein_coding	231	AKR1B1	1.07346253038348e-05	-0.077675574	0	0	0	NA	NA	NA	NA	Yes	IMR90	3.4e-06	7:134551474	34
ENSG00000172331	BPGM	7	134331560	134364565	1	protein_coding	669	BPGM	0.126322243893593	-0.197315184	0	0	0	NA	NA	NA	NA	Yes	hESC:IMR90:Mesenchymal_Stem_Cell:Mesendoderm:Trophoblast-like_Cell	3.4e-06	7:134551474	34
ENSG00000122786	CALD1	7	134429003	134655479	1	protein_coding	800	CALD1	0.99909770368326	-0.07331814	4	25.1	0	NA	NA	NA	NA	No	NA	3.4e-06	7:134551474;rs115958096	34
ENSG00000122783	C7orf49	7	134777115	134855547	-1	protein_coding	78996	C7orf49	0.335421676073075	0.903750836	0	0	0	NA	NA	NA	NA	Yes	GM12878:IMR90:Left_Ventricle:Liver:Mesenchymal_Stem_Cell	3.4e-06	7:134551474	34
ENSG00000272941	RP11-134L10.1	7	134853155	134854299	1	antisense	NA	NA	NA	NA	0	0	0	NA	NA	NA	NA	Yes	GM12878:IMR90:Left_Ventricle:Liver:Mesenchymal_Stem_Cell	3.4e-06	7:134551474	34
ENSG00000105875	WDR91	7	134868590	134896316	-1	protein_coding	29062	WDR91	0.00140853962093613	1.515212246	0	0	0	NA	NA	NA	NA	Yes	IMR90:Left_Ventricle:Mesenchymal_Stem_Cell	3.4e-06	7:134551474	34
ENSG00000156395	SORCS3	10	106400859	107024993	1	protein_coding	22986	SORCS3	0.325134263508276	0.170375294	0	0	0	NA	NA	NA	NA	Yes	IMR90:Mesenchymal_Stem_Cell	2.1e-07	rs11193156	45
ENSG00000108018	SORCS1	10	108333421	108924292	-1	protein_coding	114815	SORCS1	0.969565842045511	NA	1	19.34	0	NA	NA	NA	NA	Yes	hESC:IMR90:Left_Ventricle:Mesenchymal_Stem_Cell:Mesendoderm:Trophoblast-like_Cell	2.1e-07	rs11193156	45
ENSG00000203434	RP11-163F15.1	10	110307733	110321573	-1	lincRNA	NA	NA	NA	NA	0	0	0	NA	NA	NA	NA	Yes	hESC:IMR90:Mesenchymal_Stem_Cell:Mesendoderm	2.1e-07	rs11193156	45
ENSG00000108039	XPNPEP1	10	111624524	111683311	-1	protein_coding	7511	XPNPEP1	0.964214096910664	NA	0	0	0	NA	NA	NA	NA	Yes	Mesendoderm	2.1e-07	rs11193156	45
ENSG00000249456	RP11-298J20.4	10	126605712	126631450	1	sense_overlapping	NA	NA	NA	NA	0	0	1	4.72391e-07	0.000347723746857112	BIOS_eQTL_geneLevel	+	No	NA	6.6e-07	rs3781409	46
ENSG00000019995	ZRANB1	10	126630692	126676758	1	protein_coding	54764	ZRANB1	0.99983984952777	1.202028273	0	0	1	1.66918e-08	2.32517584142301e-05	BIOS_eQTL_geneLevel	+	No	NA	6.6e-07	rs3781409	46
ENSG00000254560	RP11-1L12.3	11	27068733	27241660	-1	antisense	103695435	BBOX1-AS1	NA	NA	0	0	0	NA	NA	NA	NA	Yes	Mesenchymal_Stem_Cell	0.00043	rs7949247	47
ENSG00000109881	CCDC34	11	27352374	27385415	-1	protein_coding	91057	CCDC34	4.91354825835912e-07	-0.41837001	0	0	0	NA	NA	NA	NA	Yes	IMR90:Mesenchymal_Stem_Cell:Mesendoderm	0.00043	rs7949247	47
ENSG00000148943	LIN7C	11	27516123	27528320	-1	protein_coding	55327	LIN7C	0.0300652295135779	-0.643347175	0	0	0	NA	NA	NA	NA	Yes	hESC:IMR90:Mesenchymal_Stem_Cell:Mesendoderm:Trophoblast-like_Cell	0.00043	rs7949247	47
ENSG00000245573	BDNF-AS	11	27528385	27719721	1	antisense	497258	BDNF-AS	NA	NA	0	0	0	NA	NA	NA	NA	Yes	hESC:IMR90:Mesenchymal_Stem_Cell:Mesendoderm:Trophoblast-like_Cell	0.00043	rs7949247	47
ENSG00000254934	LINC00678	11	27639173	27656174	-1	lincRNA	101410541	LINC00678	NA	NA	0	0	0	NA	NA	NA	NA	Yes	hESC:IMR90:Mesenchymal_Stem_Cell:Mesendoderm:Neural_Progenitor_Cell:Trophoblast-like_Cell	0.00043	rs7949247	47
ENSG00000176697	BDNF	11	27676440	27743605	-1	protein_coding	627	BDNF	0.946719308479018	0.108206454	0	0	0	NA	NA	NA	NA	Yes	Aorta:GM12878:hESC:IMR90:Liver:Mesenchymal_Stem_Cell:Mesendoderm:Neural_Progenitor_Cell:Trophoblast-like_Cell	0.00043	rs7949247	47
ENSG00000121621	KIF18A	11	28042167	28129855	-1	protein_coding	81930	KIF18A	0.149441082550392	-0.472005248	0	0	0	NA	NA	NA	NA	Yes	hESC:IMR90:Mesenchymal_Stem_Cell:Mesendoderm	0.00043	rs7949247	47
ENSG00000169519	METTL15	11	28129795	28355054	1	protein_coding	196074	METTL15	0.000155430996855608	-1.293049057	0	0	0	NA	NA	NA	NA	Yes	hESC:IMR90:Mesenchymal_Stem_Cell:Mesendoderm	0.00043	rs7949247	47
ENSG00000254526	RP11-466I1.1	11	29181503	29288281	1	lincRNA	NA	NA	NA	NA	2	16.44	0	NA	NA	NA	NA	No	NA	0.00043	rs7949247	47
ENSG00000255450	CTD-2063L20.1	11	29297202	29298112	1	pseudogene	NA	NA	NA	NA	1	15.71	0	NA	NA	NA	NA	No	NA	0.00043	rs7949247	47
ENSG00000182255	KCNA4	11	30031288	30038570	-1	protein_coding	3739	KCNA4	0.946234021376117	-1.246154006	0	0	0	NA	NA	NA	NA	Yes	hESC:Mesendoderm	0.00043	rs7949247	47
ENSG00000152219	ARL14EP	11	30344598	30359774	1	protein_coding	120534	ARL14EP	0.151697478147144	-0.308297892	0	0	0	NA	NA	NA	NA	Yes	hESC:Mesendoderm	0.00043	rs7949247	47
ENSG00000226554	SOGA2P1	13	71497796	71498587	1	pseudogene	100288130	SOGA2P1	NA	NA	0	0	0	NA	NA	NA	NA	Yes	Left_Ventricle:Mesenchymal_Stem_Cell	5.9e-06	rs73525753	55
ENSG00000226846	LINC00348	13	71589273	71742549	1	lincRNA	100885781	LINC00348	NA	NA	0	0	0	NA	NA	NA	NA	Yes	Mesenchymal_Stem_Cell	5.9e-06	rs73525753	55
ENSG00000165659	DACH1	13	72012098	72441330	-1	protein_coding	1602	DACH1	0.995944076016472	-0.401630424	0	0	0	NA	NA	NA	NA	Yes	hESC:Mesendoderm	5.9e-06	rs73525753	55
ENSG00000183098	GPC6	13	93879095	95059655	1	protein_coding	10082	GPC6	0.338854613354057	-0.297958301	1	16.89	0	NA	NA	NA	NA	No	NA	1.2e-06	rs9589924	56
ENSG00000236520	GPC6-AS1	13	94806447	94840245	-1	antisense	100873972	GPC6-AS1	NA	NA	1	16.89	0	NA	NA	NA	NA	No	NA	1.2e-06	rs9589924	56
ENSG00000265943	RP11-739L10.1	18	20279444	20513727	-1	antisense	NA	NA	NA	NA	1	19.07	1	6.93179e-06	1.35454e-05	GTEx_v7_Esophagus_Mucosa:GTEx_v7_Testis	+	No	NA	6.7e-05	rs111529616	68
ENSG00000266850	RP11-370A5.1	18	20303454	20487684	-1	antisense	101927571	LOC101927571	NA	NA	1	19.07	0	NA	NA	NA	NA	No	NA	6.7e-05	rs111529616	68
ENSG00000101773	RBBP8	18	20378224	20606451	1	protein_coding	5932	RBBP8	0.000108378971563585	-0.338766026	1	19.07	1	-9	0	BIOS_eQTL_geneLevel:GTEx_v6_Whole_Blood:GTEx_v7_Whole_Blood:CMC_SVA_cis	-	No	NA	6.7e-05	rs111529616	68
ENSG00000265939	UBE2CP2	18	20480449	20480958	-1	pseudogene	646595	UBE2CP2	NA	NA	0	0	1	1.82174e-05	0.010451	GTEx_v7_Esophagus_Mucosa:GTEx_v7_Skin_Sun_Exposed_Lower_leg	+	No	NA	6.7e-05	rs111529616	68
ENSG00000264817	MIR4741	18	20513312	20513401	1	miRNA	100616139	MIR4741	NA	NA	0	0	1	1.73239e-08	2.90309469894908e-05	BIOS_eQTL_geneLevel	-	No	NA	6.7e-05	rs111529616	68
ENSG00000105698	USF2	19	35759881	35770724	1	protein_coding	7392	USF2	0.992520444067371	NA	0	0	0	NA	NA	NA	NA	Yes	IMR90:Mesenchymal_Stem_Cell:Mesendoderm	3.4e-05	rs140186262	69
ENSG00000105695	MAG	19	35783028	35804707	1	protein_coding	4099	MAG	0.540766816780039	-0.17299365	0	0	0	NA	NA	NA	NA	Yes	IMR90:Mesenchymal_Stem_Cell:Mesendoderm	3.4e-05	rs140186262	69
ENSG00000105679	GAPDHS	19	36024314	36036218	1	protein_coding	26330	GAPDHS	0.135772125697306	-0.33913124	0	0	0	NA	NA	NA	NA	Yes	hESC:IMR90:Mesenchymal_Stem_Cell:Mesendoderm	3.4e-05	rs140186262	69
ENSG00000236144	AD000090.2	19	36031640	36036931	-1	antisense	100506469	TMEM147-AS1	NA	NA	0	0	0	NA	NA	NA	NA	Yes	hESC:IMR90:Mesenchymal_Stem_Cell:Mesendoderm	3.4e-05	rs140186262	69
ENSG00000105677	TMEM147	19	36036497	36038428	1	protein_coding	10430	TMEM147	0.137954529384416	-0.311436295	0	0	0	NA	NA	NA	NA	Yes	hESC:IMR90:Mesenchymal_Stem_Cell:Mesendoderm	3.4e-05	rs140186262	69
ENSG00000105675	ATP4A	19	36040945	36054560	-1	protein_coding	495	ATP4A	6.98616960990842e-08	-0.257183017	0	0	0	NA	NA	NA	NA	Yes	GM12878:hESC:IMR90:Liver:Mesenchymal_Stem_Cell:Mesendoderm:Trophoblast-like_Cell	3.4e-05	rs140186262	69
ENSG00000267626	AC002115.9	19	36099187	36103568	-1	lincRNA	NA	NA	NA	NA	1	15.87	0	NA	NA	NA	NA	No	NA	3.4e-05	rs140186262	69
ENSG00000249115	HAUS5	19	36103646	36116251	1	protein_coding	23354	HAUS5	0.000826136639407559	-0.025464759	1	15.87	0	NA	NA	NA	NA	No	NA	3.4e-05	rs140186262	69
ENSG00000126254	RBM42	19	36119932	36128588	1	protein_coding	79171	RBM42	0.759889530892988	0.109123877	2	15.87	0	NA	NA	NA	NA	No	NA	1.7e-05	rs140186262	69
ENSG00000105672	ETV2	19	36132647	36135773	1	protein_coding	2116	ETV2	0.0328967978548939	-0.436839257	1	13.27	0	NA	NA	NA	NA	No	NA	1.7e-05	rs140186262	69
ENSG00000126267	COX6B1	19	36139125	36149763	1	protein_coding	1340	COX6B1	0.0816220932965698	-0.124788208	1	13.27	0	NA	NA	NA	NA	No	NA	1.7e-05	rs140186262	69
ENSG00000105668	UPK1A	19	36157715	36169367	1	protein_coding	11045	UPK1A	3.36196571713144e-05	-0.102742169	1	16.25	0	NA	NA	NA	NA	No	NA	0.00013	rs140186262	69
ENSG00000267190	AC002314.4	19	36174680	36175103	-1	pseudogene	NA	NA	NA	NA	1	16.25	0	NA	NA	NA	NA	No	NA	0.00013	rs140186262	69
