# Supplementary material for: Genetic associations with carotid intima-media thickness link to atherosclerosis biology with sex-differences in sub-Saharan Africans
Source: Research Square preprint supplement (doi:10.21203/rs.3.rs-147838/v1), 2021-01-22
Supplement: Supplementary file 13 [file 86bbce54a0692b7d95ff50fb.xlsx]

## Sheet: snps
uniqID	rsID	chr	pos	non_effect_allele	effect_allele	MAF		gwasP	beta	se	r2	IndSigSNP	GenomicLocus	nearestGene	dist	func	CADD	RDB	minChrState	commonChrState	posMapFilt	eqtlMapFilt	ciMapFilt
1:17251055:C:T	rs9435703	1	17251055	T	C	0.4887	0.5113	2.1e-05	0.0143494	0.00341674	0.77243	rs3768580	1	CROCC	0	intronic	5.139	5	4	5	0	0	0
1:17254939:A:G	rs9435706	1	17254939	A	G	0.4834	0.5166	4e-05	0.01372	0.00338327	0.717832	rs3768580	1	CROCC	0	intronic	7.879	5	2	5	0	0	0
1:17268329:A:C	rs9435715	1	17268329	A	C	0.475	0.525	3.3e-06	-0.0146666	0.00317265	1	rs9435715	1	CROCC	0	intronic	2.763	7	4	5	0	0	0
1:17274319:A:G	rs3768581	1	17274319	G	A	0.4849	0.5151	9.4e-06	-0.0139431	0.00320094	0.809871	rs3768580	1	CROCC	0	intronic	NA	NA	4	5	0	0	0
1:17274338:G:T	rs3768580	1	17274338	T	G	0.4826	0.5174	5.7e-06	-0.0142881	0.00319864	1	rs3768580	1	CROCC	0	intronic	NA	NA	4	5	0	0	0
1:96608960:A:T	rs6593588	1	96608960	A	T	0.05068	0.94932	0.04	-0.0125431	0.00613272	0.676662	rs139780566	2	RNU1-130P	82496	intergenic	14.35	5	9	15	0	0	0
1:96618297:C:T	rs148233323	1	96618297	T	C	0.04312	0.95688	0.0038	-0.0198239	0.00694839	0.791196	rs139780566	2	RNU1-130P	73159	intergenic	4.553	7	8	15	0	0	0
1:96622558:C:G	rs59269310	1	96622558	G	C	0.05068	0.94932	0.038	-0.0126137	0.0061202	0.676662	rs139780566	2	RNU1-130P	68898	intergenic	7.571	6	9	15	0	0	0
1:96627657:G:T	rs116052350	1	96627657	G	T	0.04312	0.95688	0.0026	-0.0205189	0.0069079	0.791196	rs139780566	2	RNU1-130P	63799	intergenic	3.826	5	9	15	0	0	0
1:96627885:C:T	rs114382046	1	96627885	T	C	0.05068	0.94932	0.034	-0.0128581	0.00611001	0.676662	rs139780566	2	RNU1-130P	63571	intergenic	2.857	6	9	15	0	0	0
1:96631789:C:T	rs139733425	1	96631789	T	C	0.04312	0.95688	0.001	-0.0227542	0.0070232	0.791196	rs139780566	2	RNU1-130P	59667	intergenic	1.344	6	9	15	0	0	0
1:96641943:C:T	rs115481504	1	96641943	C	T	0.04312	0.95688	0.00063	-0.0237283	0.00703902	0.791196	rs139780566	2	RNU1-130P	49513	intergenic	2.417	7	14	15	0	0	0
1:96643665:C:T	rs114126241	1	96643665	T	C	0.05068	0.94932	0.013	-0.0152352	0.00621013	0.676662	rs139780566	2	RNU1-130P	47791	intergenic	5.004	6	9	15	0	0	0
1:96645859:G:T	rs115295254	1	96645859	G	T	0.04463	0.95537	0.012	-0.0157657	0.00633834	0.763623	rs139780566	2	RNU1-130P	45597	intergenic	12.32	5	9	15	0	0	0
1:96646189:C:T	rs116715211	1	96646189	T	C	0.04463	0.95537	0.012	-0.0157657	0.00633834	0.763623	rs139780566	2	RNU1-130P	45267	intergenic	0.471	5	9	15	0	0	0
1:96646869:C:T	rs115484133	1	96646869	T	C	0.04463	0.95537	0.012	-0.0157582	0.00633834	0.763623	rs139780566	2	RNU1-130P	44587	intergenic	NA	7	9	15	0	0	0
1:96646876:A:G	rs116021905	1	96646876	G	A	0.03707	0.96293	0.00047	-0.0250192	0.00724712	0.921796	rs139780566	2	RNU1-130P	44580	intergenic	3.543	7	9	15	0	0	0
1:96646939:A:G	rs148408492	1	96646939	G	A	0.04463	0.95537	0.012	-0.0157582	0.00633834	0.763623	rs139780566	2	RNU1-130P	44517	intergenic	9.263	6	9	15	0	0	0
1:96647473:G:T	rs150597250	1	96647473	T	G	0.04463	0.95537	0.011	-0.016025	0.00634925	0.763623	rs139780566	2	RNU1-130P	43983	intergenic	6.982	7	9	15	0	0	0
1:96648541:A:G	rs143721063	1	96648541	G	A	0.05446	0.94554	0.011	-0.0157644	0.00626478	0.61978	rs139780566	2	RNU1-130P	42915	intergenic	0.064	6	9	15	0	0	0
1:96650360:A:C	rs114058834	1	96650360	A	C	0.04463	0.95537	0.01	-0.0160832	0.00627196	0.763623	rs139780566	2	RNU1-130P	41096	intergenic	0.083	6	5	15	0	0	0
1:96651604:A:G	rs148260357	1	96651604	G	A	0.04463	0.95537	0.012	-0.0157523	0.00634064	0.763623	rs139780566	2	RNU1-130P	39852	intergenic	2.125	7	5	15	0	0	0
1:96653170:A:G	rs116706131	1	96653170	A	G	0.04463	0.95537	0.012	-0.0157523	0.00634064	0.763623	rs139780566	2	RNU1-130P	38286	intergenic	0.536	6	5	15	0	0	0
1:96653192:C:T	rs114318654	1	96653192	T	C	0.04463	0.95537	0.012	-0.0157523	0.00634064	0.763623	rs139780566	2	RNU1-130P	38264	intergenic	2.751	7	5	15	0	0	0
1:96653684:G:T	rs144944902	1	96653684	T	G	0.04463	0.95537	0.012	-0.0157523	0.00634064	0.763623	rs139780566	2	RNU1-130P	37772	intergenic	0.495	5	5	15	0	0	0
1:96653769:A:G	rs116487960	1	96653769	G	A	0.04463	0.95537	0.012	-0.0157523	0.00634064	0.763623	rs139780566	2	RNU1-130P	37687	intergenic	21.3	7	5	15	0	0	0
1:96655436:A:T	rs150607179	1	96655436	T	A	0.04387	0.95613	0.008	-0.0166994	0.00634878	0.777187	rs139780566	2	RNU1-130P	36020	intergenic	NA	6	5	15	0	0	0
1:96655987:G:T	rs147967752	1	96655987	T	G	0.04463	0.95537	0.012	-0.0158901	0.00635063	0.763623	rs139780566	2	RNU1-130P	35469	intergenic	0.504	7	5	15	0	0	0
1:96663619:C:T	rs115858830	1	96663619	T	C	0.04387	0.95613	0.0017	-0.0213359	0.0068435	0.882505	rs139780566	2	RNU1-130P	27837	intergenic	2.125	7	9	15	0	0	0
1:96664947:A:T	rs114382392	1	96664947	A	T	0.04766	0.95234	0.00088	-0.0216201	0.00653059	0.81297	rs139780566	2	RNU1-130P	26509	intergenic	4.468	7	14	15	0	0	0
1:96665404:A:G	rs148903834	1	96665404	G	A	0.04009	0.95991	0.00018	-0.0263994	0.00712902	0.962209	rs139780566	2	RNU1-130P	26052	intergenic	3.587	6	9	15	0	0	0
1:96666755:A:T	rs138923898	1	96666755	T	A	0.04387	0.95613	0.0011	-0.0220712	0.00681033	0.882505	rs139780566	2	RNU1-130P	24701	intergenic	2.966	6	9	15	0	0	0
1:96667462:C:T	rs7548502	1	96667462	T	C	0.04766	0.95234	0.00073	-0.0218833	0.00650714	0.81297	rs139780566	2	RNU1-130P	23994	intergenic	2.803	7	9	15	0	0	0
1:96667565:C:T	rs144032669	1	96667565	T	C	0.04766	0.95234	0.00073	-0.0218833	0.00650714	0.81297	rs139780566	2	RNU1-130P	23891	intergenic	1.987	7	9	15	0	0	0
1:96668998:C:T	rs114213939	1	96668998	T	C	0.04387	0.95613	0.0011	-0.0221138	0.00680263	0.882505	rs139780566	2	RNU1-130P	22458	intergenic	1.269	6	13	15	0	0	0
1:96670577:A:G	rs72733772	1	96670577	A	G	0.04992	0.95008	0.00052	-0.022236	0.00643314	0.775889	rs139780566	2	RNU1-130P	20879	intergenic	9.962	7	9	15	0	0	0
1:96674938:G:T	rs74103762	1	96674938	T	G	0.05749	0.94251	1.9e-05	-0.0263308	0.00615696	0.68039	rs139780566	2	RNU1-130P	16518	intergenic	0.023	6	5	15	0	0	0
1:96684358:A:G	rs139780566	1	96684358	A	G	0.03858	0.96142	4.8e-06	-0.0330665	0.0072532	1	rs139780566	2	RNU1-130P	7098	intergenic	2.666	6	5	15	0	0	0
1:96699886:A:T	rs114423860	1	96699886	A	T	0.05598	0.94402	0.0091	-0.014461	0.00560651	0.66342	rs139780566	2	RNU1-130P	8269	intergenic	3.6	2c	2	15	0	0	0
1:96719407:G:T	rs116048063	1	96719407	G	T	0.05673	0.94327	0.0039	-0.0159639	0.00557394	0.654278	rs139780566	2	RP5-898J17.1	217	downstream	7.29	5	1	15	0	0	0
1:96722846:C:T	rs115361694	1	96722846	C	T	0.05673	0.94327	0.0027	-0.016575	0.00556512	0.654278	rs139780566	2	RP5-898J17.1	0	ncRNA_intronic	4.171	5	5	15	0	0	0
1:163865550:A:C	rs114119990	1	163865550	C	A	0.04312	0.95688	8.2e-07	0.0324495	0.00659599	1	rs114119990	3	U3	27356	intergenic	1.122	4	7	15	0	0	0
1:163876748:A:G	rs75835984	1	163876748	A	G	0.03404	0.96596	1e-05	0.0289225	0.00666955	0.709651	rs114119990	3	U3	16158	intergenic	8.732	6	9	15	0	0	0
1:163930879:A:G	rs149102999	1	163930879	G	A	0.03555	0.96445	6e-05	0.0265954	0.00662255	0.614266	rs114119990	3	U3	37769	intergenic	2.192	7	9	15	0	0	0
1:163945257:C:T	rs16823418	1	163945257	T	C	0.03555	0.96445	7.5e-05	0.0258605	0.00651324	0.614266	rs114119990	3	U3	52147	intergenic	1.62	6	9	15	0	0	0
1:222638889:C:T	rs35504908	1	222638889	C	T	0.1717	0.8283	0.0012	-0.0120567	0.00368426	0.787915	rs146649664	4	CICP13	2546	intergenic	3.608	4	1	1	0	0	0
1:222640081:C:T	rs67343492	1	222640081	T	C	0.1089	0.8911	0.00013	0.0172649	0.00450152	0.711361	rs146649664	4	CICP13	1354	intergenic	3.265	2b	5	15	0	0	0
1:222640879:C:T	rs66578029	1	222640879	T	C	0.1142	0.8858	0.00016	0.0166754	0.00442007	0.680809	rs146649664	4	CICP13	556	upstream	1.415	5	5	15	0	0	0
1:222641826:G:T	rs140250811	1	222641826	T	G	0.112	0.888	0.00019	0.016723	0.00448238	0.686877	rs146649664	4	CICP13	0	ncRNA_exonic	0.433	6	5	15	0	0	0
1:222644512:C:T	rs146649664	1	222644512	T	C	0.1483	0.8517	8.9e-06	0.0172581	0.00383898	1	rs146649664	4	CICP13	287	downstream	2.465	7	5	15	0	0	0
1:222646811:A:G	rs371137431	1	222646811	A	G	0.146	0.854	1.2e-05	0.0171201	0.00386035	0.982785	rs146649664	4	CICP13	2586	intergenic	6.113	7	5	15	0	0	0
1:222647263:A:G	rs113164582	1	222647263	A	G	0.1483	0.8517	1.2e-05	0.0170301	0.00383853	1	rs146649664	4	CICP13	3038	intergenic	0.713	4	5	15	0	0	0
1:222647346:C:G	rs112310890	1	222647346	G	C	0.1089	0.8911	0.00025	0.0164206	0.00448136	0.711361	rs146649664	4	CICP13	3121	intergenic	0.009	4	5	15	0	0	0
1:222647698:G:T	rs113020736	1	222647698	T	G	0.1475	0.8525	1.4e-05	0.0169197	0.00384346	0.994208	rs146649664	4	CICP13	3473	intergenic	1.839	6	5	15	0	0	0
1:222649491:C:G	rs71642766	1	222649491	G	C	0.3843	0.6157	0.00078	0.00945699	0.0028322	0.606303	rs67416193	4	CICP13	5266	intergenic	0.598	7	15	15	0	0	0
1:222652614:C:T	rs113484101	1	222652614	T	C	0.1467	0.8533	1.1e-05	0.0171953	0.00387001	0.988469	rs146649664	4	CICP13	8389	intergenic	1.556	6	15	15	0	0	0
1:222652709:C:T	rs142730447	1	222652709	T	C	0.146	0.854	1.1e-05	0.0171953	0.00387001	0.982785	rs146649664	4	CICP13	8484	intergenic	3.023	6	15	15	0	0	0
1:222666445:C:G	rs67416193	1	222666445	C	G	0.3215	0.6785	8.2e-07	0.014608	0.0029722	1	rs67416193	4	RNU6-791P	10528	intergenic	0.075	7	15	15	0	0	0
1:222673217:A:G	rs113225968	1	222673217	G	A	0.3245	0.6755	0.0051	0.00846176	0.00293177	0.634109	rs67416193	4	RNU6-791P	3756	intergenic	6.406	7	9	15	0	0	0
1:222673983:C:G	rs71211955	1	222673983	G	C	0.3457	0.6543	0.00044	0.0102945	0.0028847	0.798553	rs67416193	4	RNU6-791P	2990	intergenic	NA	6	15	15	0	0	0
1:248797787:C:G	rs146962840	1	248797787	G	C	0.0469	0.9531	8e-07	-0.0487967	0.00991374	1	rs146962840	5	OR2T35	3800	intergenic	0.505	7	9	15	0	0	0
2:80088031:C:T	rs138779662	2	80088031	T	C	0.01891	0.98109	8.2e-06	-0.0555136	0.0121388	1	rs138779662	6	CTNNA2	0	intronic	4.413	4	5	15	0	0	0
2:131679669:A:G	rs112404366	2	131679669	A	G	0.2292	0.7708	2.1e-05	0.013517	0.00324994	0.874419	rs72861463	7	ARHGEF4	0	intronic	0.175	6	5	15	0	0	0
2:131679747:A:C	rs111276332	2	131679747	C	A	0.2292	0.7708	2.1e-05	0.013517	0.00324994	0.874419	rs72861463	7	ARHGEF4	0	intronic	1.571	7	5	15	0	0	0
2:131680350:G:T	rs72855764	2	131680350	G	T	0.2292	0.7708	1.4e-05	0.0138247	0.00323402	0.874419	rs72861463	7	ARHGEF4	0	intronic	0.68	5	5	15	0	0	0
2:131680793:A:G	rs72855766	2	131680793	A	G	0.2315	0.7685	1.1e-05	0.0139358	0.0032328	0.854788	rs72861463	7	ARHGEF4	0	intronic	0.286	7	5	15	0	0	0
2:131681642:G:T	rs7562333	2	131681642	G	T	0.4856	0.5144	0.00012	0.0104001	0.00271918	0.631788	rs6718816	7	ARHGEF4	0	intronic	2.283	7	4	15	0	0	0
2:131681791:A:G	rs28460818	2	131681791	A	G	0.4856	0.5144	0.00012	0.0104198	0.00272013	0.631788	rs6718816	7	ARHGEF4	0	intronic	2.299	7	4	15	0	0	0
2:131682899:A:C	rs60796692	2	131682899	C	A	0.4864	0.5136	0.00011	0.0104542	0.00271422	0.637575	rs6718816	7	ARHGEF4	0	intronic	4.478	6	4	15	0	0	0
2:131683222:A:G	rs67239160	2	131683222	G	A	0.4077	0.5923	4.8e-06	0.0127553	0.00275497	0.987448	rs6718816	7	ARHGEF4	0	intronic	5.727	6	5	15	0	0	0
2:131684663:C:T	rs6430431	2	131684663	T	C	0.4077	0.5923	4.3e-06	0.0128102	0.0027546	0.987448	rs6718816	7	ARHGEF4	0	intronic	11.33	6	5	15	0	0	0
2:131685354:G:T	rs4502464	2	131685354	T	G	0.4864	0.5136	0.00011	0.0104641	0.00271424	0.637575	rs6718816	7	ARHGEF4	0	intronic	5.877	7	4	15	0	0	0
2:131685742:G:T	rs4247443	2	131685742	G	T	0.4864	0.5136	0.0001	0.0104913	0.0027143	0.637575	rs6718816	7	ARHGEF4	0	intronic	2.702	6	4	15	0	0	0
2:131685875:C:T	rs4247444	2	131685875	C	T	0.4864	0.5136	0.00011	0.0104641	0.00271424	0.637575	rs6718816	7	ARHGEF4	0	intronic	1.451	1f	4	15	0	0	0
2:131686764:G:T	rs4241178	2	131686764	G	T	0.4864	0.5136	0.0001	0.0104896	0.00271441	0.637575	rs6718816	7	ARHGEF4	0	intronic	4.072	5	4	15	0	0	0
2:131688179:A:G	rs6718310	2	131688179	A	G	0.4047	0.5953	3.3e-06	0.0129386	0.00274775	1	rs6718816	7	ARHGEF4	0	intronic	2.675	6	4	15	0	0	0
2:131688293:A:T	rs72861462	2	131688293	T	A	0.2126	0.7874	1.7e-05	0.0145503	0.003498	0.976192	rs72861463	7	ARHGEF4	0	intronic	0.213	6	4	15	0	0	0
2:131688382:G:T	rs72861463	2	131688382	T	G	0.2088	0.7912	9.7e-06	0.0150438	0.00351204	1	rs72861463	7	ARHGEF4	0	intronic	1.603	7	4	15	0	0	0
2:131688587:A:G	rs6718816	2	131688587	A	G	0.4047	0.5953	3.1e-06	0.012973	0.00274536	1	rs6718816	7	ARHGEF4	0	exonic	8.094	5	4	15	0	0	0
2:131698649:C:T	rs72861470	2	131698649	T	C	0.208	0.792	9.9e-06	0.0150182	0.00351038	0.995175	rs72861463	7	ARHGEF4	0	intronic	1.17	7	4	15	0	0	0
2:131700784:A:T	rs67521504	2	131700784	A	T	0.4077	0.5923	3.7e-06	0.0129059	0.00275322	0.987639	rs6718816	7	ARHGEF4	0	intronic	5.661	7	5	15	0	0	0
2:131719739:G:T	rs72861480	2	131719739	T	G	0.2171	0.7829	4.1e-05	0.0137581	0.00346381	0.939947	rs72861463	7	ARHGEF4	0	intronic	4.398	5	5	13	0	0	0
2:131731464:C:T	rs4314035	2	131731464	C	T	0.2118	0.7882	2.6e-05	0.0141296	0.00347615	0.981023	rs72861463	7	ARHGEF4	0	intronic	6.818	NA	5	15	0	0	0
2:132800541:A:G	rs13428709	2	132800541	G	A	0.4539	0.5461	0.0021	-0.00932744	0.00316657	0.869677	rs7369729	8	AC093787.1	4974	intergenic	11.66	6	9	15	0	0	0
2:132800586:C:T	rs7369729	2	132800586	T	C	0.4584	0.5416	5.4e-06	-0.0140355	0.00315	1	rs7369729	8	AC093787.1	5019	intergenic	0.479	7	9	15	0	0	0
2:142580270:C:T	rs141639794	2	142580270	C	T	0.02345	0.97655	5.1e-06	-0.0415575	0.00918611	1	rs141639794	9	LRP1B	0	intronic	0.518	6	5	15	0	0	0
3:69341777:C:T	rs73838339	3	69341777	C	T	0.02194	0.97806	0.00018	-0.0427735	0.0114644	0.786102	rs73838341	10	FRMD4B	0	intronic	1.663	5	4	15	0	0	0
3:69344040:C:T	rs73838340	3	69344040	T	C	0.02194	0.97806	0.00018	-0.0429005	0.0114659	0.786102	rs73838341	10	FRMD4B	0	intronic	4.47	3a	2	15	0	0	0
3:69347167:C:T	rs73838341	3	69347167	C	T	0.02799	0.97201	1.9e-06	-0.0472954	0.00984112	1	rs73838341	10	FRMD4B	0	intronic	4.322	5	4	15	0	0	0
3:69347666:C:G	rs73838342	3	69347666	G	C	0.02118	0.97882	0.0027	-0.0331345	0.0110645	0.759743	rs73838341	10	FRMD4B	0	intronic	0.302	5	4	15	0	0	0
3:173175112:A:G	rs73036253	3	173175112	G	A	0.01815	0.98185	0.0004	-0.0388506	0.0110142	0.724796	rs141803894	11	NLGN1	0	intronic	0.515	7	5	15	0	0	0
3:173182514:C:T	rs73036270	3	173182514	T	C	0.01891	0.98109	0.00025	-0.0402744	0.0110385	0.694014	rs141803894	11	NLGN1	0	intronic	2.707	7	5	15	0	0	0
3:173190658:A:G	rs113431019	3	173190658	A	G	0.01815	0.98185	0.00041	-0.0381665	0.0108554	0.724796	rs141803894	11	NLGN1	0	intronic	5.109	5	5	15	0	0	0
3:173205874:G:T	rs73038181	3	173205874	T	G	0.01815	0.98185	0.00041	-0.0379969	0.0108189	0.724796	rs141803894	11	NLGN1	0	intronic	0.428	7	15	15	0	0	0
3:173215531:C:T	rs73043540	3	173215531	C	T	0.01815	0.98185	0.00043	-0.0378676	0.0108191	0.724796	rs141803894	11	NLGN1	0	intronic	1.814	5	5	15	0	0	0
3:173218648:A:G	rs73043541	3	173218648	G	A	0.01815	0.98185	0.0004	-0.0379485	0.010792	0.724796	rs141803894	11	NLGN1	0	intronic	1.547	5	5	15	0	0	0
3:173221929:A:G	rs143012598	3	173221929	G	A	0.0174	0.9826	0.00063	-0.036591	0.0107829	0.690758	rs141803894	11	NLGN1	0	intronic	2.117	6	5	15	0	0	0
3:173224870:C:T	rs141889391	3	173224870	C	T	0.02723	0.97277	4.1e-05	-0.0366979	0.00891172	0.825409	rs141803894	11	NLGN1	0	intronic	2.164	5	5	15	0	0	0
3:173230368:C:T	rs141803894	3	173230368	C	T	0.02269	0.97731	7.9e-06	-0.0443875	0.00996112	1	rs141803894	11	NLGN1	0	intronic	2.048	7	5	15	0	0	0
3:173234021:A:G	rs115088137	3	173234021	G	A	0.03026	0.96974	0.00013	-0.0264638	0.00700482	0.738114	rs141803894	11	NLGN1	0	intronic	1.099	7	5	15	0	0	0
3:173234092:A:G	rs115993399	3	173234092	G	A	0.03026	0.96974	0.0002	-0.0247895	0.00677595	0.738114	rs141803894	11	NLGN1	0	intronic	0.116	6	5	15	0	0	0
3:173236140:A:T	rs140561267	3	173236140	A	T	0.03404	0.96596	0.00027	-0.0244391	0.00680103	0.650819	rs141803894	11	NLGN1	0	intronic	6.577	6	5	15	0	0	0
3:173245789:A:T	rs142219020	3	173245789	A	T	0.03404	0.96596	0.00016	-0.0255669	0.00686693	0.650819	rs141803894	11	NLGN1	0	intronic	6.896	7	5	15	0	0	0
3:173247331:C:T	rs115690258	3	173247331	T	C	0.03404	0.96596	0.0002	-0.0252642	0.00687099	0.650819	rs141803894	11	NLGN1	0	intronic	8.957	3a	7	15	0	0	0
3:173251322:A:G	rs150495830	3	173251322	G	A	0.03026	0.96974	0.00032	-0.0248403	0.00701501	0.738114	rs141803894	11	NLGN1	0	intronic	1.85	7	5	15	0	0	0
3:173254941:A:G	rs139045163	3	173254941	G	A	0.03026	0.96974	0.00046	-0.0241918	0.00702148	0.738114	rs141803894	11	NLGN1	0	intronic	3.93	6	5	15	0	0	0
3:173255636:A:C	rs146023642	3	173255636	C	A	0.03404	0.96596	0.00032	-0.0244423	0.00687745	0.650819	rs141803894	11	NLGN1	0	intronic	9.449	7	5	15	0	0	0
3:173265151:A:G	rs114113762	3	173265151	G	A	0.03404	0.96596	0.0016	-0.0226226	0.00717808	0.650819	rs141803894	11	NLGN1	0	intronic	12.12	3a	5	15	0	0	0
3:173323478:A:T	rs146687599	3	173323478	A	T	0.04614	0.95386	5.9e-06	-0.035361	0.00781655	1	rs138136388	12	NLGN1	0	intronic	4.281	7	4	15	0	0	0
3:173324490:G:T	rs138136388	3	173324490	G	T	0.04614	0.95386	4.5e-06	-0.0357281	0.00780048	1	rs138136388	12	NLGN1	0	intronic	0.069	6	5	15	0	0	0
3:173341458:A:G	rs114469203	3	173341458	A	G	0.04614	0.95386	1.2e-05	-0.0333172	0.00758942	1	rs138136388	12	NLGN1	0	intronic	6.32	7	5	15	0	0	0
3:173388964:A:G	rs115545545	3	173388964	A	G	0.04539	0.95461	6.6e-05	-0.0325255	0.00815585	0.982598	rs138136388	12	NLGN1	0	intronic	4.161	7	5	15	0	0	0
3:189924215:G:T	rs143435088	3	189924215	T	G	0.01059	0.98941	1.9e-06	-0.042956	0.00952604	1	rs143435088	13	NMNAT1P3	38774	intergenic	0.75	3a	5	15	0	0	0
3:189925450:A:G	rs138982346	3	189925450	A	G	0.01059	0.98941	4.9e-06	-0.0407816	0.00942014	1	rs143435088	13	NMNAT1P3	40009	intergenic	2.365	7	5	15	0	0	0
4:74848201:C:T	rs73824586	4	74848201	C	T	0.02421	0.97579	5e-06	-0.0437757	0.00943423	1	rs73824586	14	PF4	359	upstream	0.474	5	2	15	0	0	0
4:74848244:C:T	rs73824587	4	74848244	C	T	0.02421	0.97579	5.3e-06	-0.0436636	0.00943486	1	rs73824587	14	PF4	402	upstream	2.143	5	2	15	0	0	0
4:119425911:C:T	rs145639082	4	119425911	C	T	0.04085	0.95915	6.2e-06	0.0291008	0.00620285	1	rs145639082	15	CEP170P1	0	ncRNA_intronic	1.623	5	5	15	0	0	0
4:155954956:C:G	rs79028271	4	155954956	C	G	0.04009	0.95991	6.3e-06	-0.0400726	0.00869974	1	rs79028271	16	RP11-92A5.2	172724	intergenic	4.653	5	7	15	0	0	0
4:163326947:A:G	rs1901120	4	163326947	A	G	0.07716	0.92284	7e-05	0.0195727	0.00505181	0.640093	rs2712672	17	MTHFD2P4	81887	intergenic	0.464	6	5	15	0	0	0
4:163336348:A:T	rs1470692	4	163336348	A	T	0.07791	0.92209	2.2e-05	0.0209499	0.00505037	0.646984	rs2712672	17	MTHFD2P4	91288	intergenic	1.156	6	14	15	0	0	0
4:163345468:G:T	rs2262313	4	163345468	T	G	0.1059	0.8941	2e-05	0.0186766	0.00452568	0.952369	rs2712672	17	TOMM22P4	97365	intergenic	10.73	6	15	15	0	0	0
4:163349584:A:G	rs2712672	4	163349584	G	A	0.1074	0.8926	8.2e-06	0.0193667	0.00450239	1	rs2712672	17	TOMM22P4	93249	intergenic	1.882	6	15	15	0	0	0
4:163367829:A:G	rs2597484	4	163367829	A	G	0.1029	0.8971	6.5e-05	0.0171209	0.00445627	0.875477	rs2712672	17	TOMM22P4	75004	intergenic	2.2	5	9	15	0	0	0
4:169571145:G:T	rs145287839	4	169571145	G	T	0.02496	0.97504	9.2e-07	-0.0520907	0.0106363	1	rs145287839	18	PALLD	0	intronic	1.27	7	4	15	0	0	0
4:189391584:C:T	rs74629928	4	189391584	C	T	0.02042	0.97958	7.7e-06	-0.0334666	0.00769013	1	rs74629928	19	LINC01060	0	ncRNA_intronic	1.237	7	5	15	0	0	0
5:777685:A:G	rs112927770	5	777685	G	A	0.05295	0.94705	6.3e-06	-0.0278896	0.00631159	1	rs112927770	20	ZDHHC11	0	intronic	4.888	4	1	15	0	0	0
5:777933:A:G	rs578032059	5	777933	G	A	0.04009	0.95991	0.00013	-0.0339978	0.00907751	0.62847	rs112927770	20	ZDHHC11	0	intronic	1.071	NA	1	15	0	0	0
5:8404858:A:G	rs73049361	5	8404858	A	G	0.1498	0.8502	7.9e-06	0.0177794	0.00400377	1	rs73049361	21	RP11-480D4.1:RP11-480D4.2	00:00:00	ncRNA_intronic	0.294	6	9	15	0	0	0
5:8407618:A:G	rs7702450	5	8407618	G	A	0.09909	0.90091	4.1e-06	0.0226451	0.00493341	1	rs7702450	21	RP11-480D4.1:RP11-480D4.2	00:00:00	ncRNA_intronic	0.45	7	9	15	0	0	0
5:8427829:G:T	rs111620157	5	8427829	G	T	0.1467	0.8533	1.7e-06	0.0197973	0.00411696	0.980717	rs73051426	21	RP11-480D4.1:RP11-480D4.2	00:00:00	ncRNA_intronic	3.864	6	9	15	0	0	0
5:8435293:C:T	rs73051426	5	8435293	C	T	0.1475	0.8525	1.4e-06	0.019845	0.0040974	1	rs73051426	21	RP11-480D4.1:RP11-480D4.2	00:00:00	ncRNA_intronic	2.485	7	5	15	0	0	0
5:8874890:A:G	rs115897350	5	8874890	A	G	0.03933	0.96067	9.8e-06	-0.0257615	0.00603357	0.648961	rs114888479	22	RP11-143A12.3	0	ncRNA_intronic	8.468	6	5	15	0	0	0
5:8887760:A:G	rs115361084	5	8887760	G	A	0.03933	0.96067	2.5e-05	-0.0246522	0.0060609	0.648961	rs114888479	22	RP11-143A12.3	6122	intergenic	7.648	6	9	15	0	0	0
5:8888153:C:T	rs114230938	5	8888153	C	T	0.06278	0.93722	6.4e-06	-0.0241793	0.0055014	0.938474	rs114888479	22	RP11-143A12.3	6515	intergenic	2.786	5	9	15	0	0	0
5:8888160:A:G	rs114888479	5	8888160	A	G	0.059	0.941	5e-06	-0.0246461	0.00554922	1	rs114888479	22	RP11-143A12.3	6522	intergenic	3.858	5	9	15	0	0	0
5:8888341:C:T	rs115552072	5	8888341	T	C	0.04009	0.95991	2.6e-05	-0.0244963	0.00603123	0.634687	rs114888479	22	RP11-143A12.3	6703	intergenic	2.54	7	9	15	0	0	0
5:32067051:C:T	rs116422476	5	32067051	C	T	0.01362	0.98638	8.9e-06	-0.0511224	0.0116851	1	rs116422476	23	PDZD2	0	intronic	4.231	5	4	15	0	0	0
5:107469179:C:T	rs547840497	5	107469179	C	T	0.01437	0.98563	1.8e-07	-0.0617874	0.0117302	1	rs547840497	24	FBXL17	0	intronic	9.899	NA	5	15	0	0	0
5:107570359:A:G	rs552690895	5	107570359	A	G	0.01286	0.98714	1.5e-06	-0.054453	0.0111759	0.688961	rs547840497	24	FBXL17	0	intronic	4.314	NA	5	15	0	0	0
5:120563634:A:T	rs73270337	5	120563634	A	T	0.121	0.879	0.00033	0.0159831	0.00457483	0.605333	rs73276540	25	CTC-546K23.1	0	ncRNA_intronic	3.117	7	9	15	0	0	0
5:120575763:C:T	rs4895172	5	120575763	C	T	0.1324	0.8676	2.7e-05	0.0179484	0.00432229	0.608574	rs73276540	25	CTC-546K23.1	0	ncRNA_intronic	0.706	5	9	15	0	0	0
5:120585763:A:G	rs56334538	5	120585763	A	G	0.1278	0.8722	2e-05	0.0183489	0.00434847	0.604276	rs73276540	25	CTC-546K23.1	0	ncRNA_intronic	5.236	6	14	15	0	0	0
5:120596943:C:T	rs73276540	5	120596943	T	C	0.0885	0.9115	7.9e-06	0.0231149	0.00525804	1	rs73276540	25	CTC-546K23.1	0	ncRNA_intronic	2.675	5	9	15	0	0	0
5:120597218:C:T	rs35295368	5	120597218	C	T	0.1339	0.8661	4.5e-05	0.0172206	0.0042927	0.649821	rs73276540	25	CTC-546K23.1	0	ncRNA_intronic	1.07	7	9	15	0	0	0
5:145135601:A:G	rs76235789	5	145135601	A	G	0.1566	0.8434	0.00023	-0.0126827	0.00365201	0.682528	5:145143045	26	PRELID2	0	intergenic	5.645	7	4	15	0	0	0
5:145139699:A:G	rs75455656	5	145139699	A	G	0.1422	0.8578	0.00042	-0.0124029	0.00374509	0.756852	5:145143045	26	PRELID2	0	UTR3	3.714	6	4	15	0	0	0
5:145141957:A:C	rs80074851	5	145141957	C	A	0.1536	0.8464	0.00016	-0.0133921	0.00372315	0.74383	5:145143045	26	PRELID2	0	intronic	8.057	7	4	15	0	0	0
5:145143045:G:T	5:145143045	5	145143045	G	T	0.1233	0.8767	6.6e-06	-0.0173655	0.0039898	1	5:145143045	26	PRELID2	0	intronic	14.17	6	4	15	1	0	0
6:47600753:C:T	rs10807355	6	47600753	C	T	0.4092	0.5908	0.00022	0.0098087	0.00276904	0.653394	rs6914280	27	CD2AP	5753	intergenic	9.352	6	5	15	0	0	0
6:47600838:A:G	6:47600838	6	47600838	A	G	0.4085	0.5915	0.00018	0.00994662	0.0027705	0.650697	rs6914280	27	CD2AP	5838	intergenic	8.504	6	5	15	0	0	0
6:47602302:A:G	rs9395290	6	47602302	A	G	0.4251	0.5749	0.0019	0.00828469	0.00276957	0.635017	rs6914280	27	CD2AP	7302	intergenic	2.469	4	5	15	0	0	0
6:47602370:A:T	rs4715034	6	47602370	A	T	0.4244	0.5756	0.0021	0.00818742	0.00277062	0.639064	rs6914280	27	CD2AP	7370	intergenic	11.84	4	5	15	0	0	0
6:47602520:G:T	rs4715035	6	47602520	T	G	0.4244	0.5756	0.0021	0.00818664	0.00277061	0.639064	rs6914280	27	CD2AP	7520	intergenic	4.161	7	5	15	0	0	0
6:47602646:C:T	rs4715036	6	47602646	C	T	0.4145	0.5855	0.0012	0.00867165	0.00278254	0.619881	rs6914280	27	CD2AP	7646	intergenic	1.565	6	5	15	0	0	0
6:47602873:A:G	rs9473142	6	47602873	A	G	0.4244	0.5756	0.0018	0.00829382	0.00276948	0.639064	rs6914280	27	CD2AP	7873	intergenic	1.915	7	5	15	0	0	0
6:47603037:C:T	rs9381583	6	47603037	T	C	0.4221	0.5779	0.0021	0.00819316	0.00277142	0.635603	rs6914280	27	CD2AP	8037	intergenic	2.65	5	5	15	0	0	0
6:47603507:C:T	rs7761656	6	47603507	C	T	0.4221	0.5779	0.002	0.00822644	0.00277209	0.635603	rs6914280	27	CD2AP	8507	intergenic	3.493	7	9	15	0	0	0
6:47603560:A:G	rs7741643	6	47603560	A	G	0.4221	0.5779	0.002	0.00822644	0.00277209	0.635603	rs6914280	27	CD2AP	8560	intergenic	8.484	6	9	15	0	0	0
6:47604055:A:G	rs7746311	6	47604055	A	G	0.4221	0.5779	0.0021	0.00819316	0.00277142	0.635603	rs6914280	27	CD2AP	9055	intergenic	2.952	6	9	15	0	0	0
6:47604213:A:G	rs9367292	6	47604213	A	G	0.4228	0.5772	0.0021	0.00819505	0.0027725	0.631554	rs6914280	27	CD2AP	9213	intergenic	7.2	6	9	15	0	0	0
6:47604565:A:T	rs112644301	6	47604565	T	A	0.4228	0.5772	0.0026	0.00803111	0.00277238	0.631554	rs6914280	27	CD2AP	9565	intergenic	4.023	7	9	15	0	0	0
6:47605223:G:T	rs9381585	6	47605223	T	G	0.4221	0.5779	0.0018	0.00831151	0.00277215	0.635603	rs6914280	27	CD2AP	10223	intergenic	6.987	7	9	15	0	0	0
6:47605678:C:T	rs9369723	6	47605678	C	T	0.4221	0.5779	0.0021	0.00819316	0.00277142	0.635603	rs6914280	27	CD2AP	10678	intergenic	0.102	6	14	15	0	0	0
6:47606727:A:G	rs6458582	6	47606727	G	A	0.4221	0.5779	0.0021	0.00819316	0.00277142	0.635603	rs6914280	27	CD2AP	11727	intergenic	2.668	6	9	15	0	0	0
6:47607732:A:G	rs10223802	6	47607732	A	G	0.4221	0.5779	0.0021	0.00819316	0.00277142	0.635603	rs6914280	27	CD2AP	12732	intergenic	3.086	7	9	15	0	0	0
6:47608014:A:C	rs6932424	6	47608014	A	C	0.4221	0.5779	0.0021	0.00819316	0.00277142	0.635603	rs6914280	27	CD2AP	13014	intergenic	5.816	7	9	15	0	0	0
6:47608096:A:G	rs6932445	6	47608096	G	A	0.4221	0.5779	0.002	0.00821832	0.0027722	0.635603	rs6914280	27	CD2AP	13096	intergenic	2.754	6	9	15	0	0	0
6:47608694:C:T	rs6913443	6	47608694	C	T	0.4198	0.5802	0.002	0.00821068	0.00277199	0.632242	rs6914280	27	CD2AP	13694	intergenic	8.848	6	5	15	0	0	0
6:47608758:A:G	rs6934018	6	47608758	A	G	0.413	0.587	0.0026	0.00807389	0.00278096	0.619023	rs6914280	27	CD2AP	13758	intergenic	7.865	5	5	15	0	0	0
6:47609076:A:G	rs6938457	6	47609076	G	A	0.4198	0.5802	0.0022	0.00814585	0.00276954	0.632242	rs6914280	27	CD2AP	14076	intergenic	5.248	7	8	15	0	0	0
6:47609960:A:G	rs6901312	6	47609960	G	A	0.4198	0.5802	0.0022	0.00814864	0.0027696	0.632242	rs6914280	27	GPR111	14211	intergenic	4.931	6	5	15	0	0	0
6:47610173:A:T	rs6901679	6	47610173	T	A	0.4191	0.5809	0.002	0.00822388	0.00277065	0.631143	rs6914280	27	GPR111	13998	intergenic	0.96	5	5	15	0	0	0
6:47610192:A:C	rs6901814	6	47610192	C	A	0.4198	0.5802	0.0022	0.00814816	0.00276962	0.632242	rs6914280	27	GPR111	13979	intergenic	0.342	5	5	15	0	0	0
6:47610239:G:T	rs6902287	6	47610239	T	G	0.4198	0.5802	0.0022	0.00814864	0.0027696	0.632242	rs6914280	27	GPR111	13932	intergenic	0.383	6	5	15	0	0	0
6:47610300:A:G	rs6902453	6	47610300	A	G	0.4198	0.5802	0.0022	0.00814864	0.0027696	0.632242	rs6914280	27	GPR111	13871	intergenic	3.446	6	5	15	0	0	0
6:47610706:G:T	rs7741546	6	47610706	T	G	0.4206	0.5794	0.0029	0.00792958	0.00277079	0.62819	rs6914280	27	GPR111	13465	intergenic	1.221	7	5	15	0	0	0
6:47611442:C:T	rs7766527	6	47611442	C	T	0.4206	0.5794	0.0011	0.00867151	0.00277185	0.648962	rs6914280	27	GPR111	12729	intergenic	1.687	7	5	15	0	0	0
6:47611800:C:G	rs6909210	6	47611800	G	C	0.4206	0.5794	0.00085	0.00889619	0.00277058	0.648962	rs6914280	27	GPR111	12371	intergenic	4.899	7	5	15	0	0	0
6:47611861:C:T	rs9381587	6	47611861	C	T	0.4206	0.5794	0.00085	0.00889619	0.00277058	0.648962	rs6914280	27	GPR111	12310	intergenic	0.219	7	5	15	0	0	0
6:47611994:A:T	rs9369728	6	47611994	T	A	0.4206	0.5794	0.00085	0.00889452	0.00277056	0.648962	rs6914280	27	GPR111	12177	intergenic	1.59	6	5	15	0	0	0
6:47612170:C:G	rs9395296	6	47612170	C	G	0.4206	0.5794	0.00085	0.00889544	0.00277055	0.648962	rs6914280	27	GPR111	12001	intergenic	0.33	7	5	15	0	0	0
6:47612202:C:T	rs9381588	6	47612202	C	T	0.4206	0.5794	0.0011	0.00867914	0.00276843	0.648962	rs6914280	27	GPR111	11969	intergenic	1.571	7	5	15	0	0	0
6:47612339:C:G	rs9395297	6	47612339	C	G	0.4206	0.5794	0.00083	0.00891102	0.00276947	0.648962	rs6914280	27	GPR111	11832	intergenic	0.048	5	5	15	0	0	0
6:47612402:C:T	rs9395298	6	47612402	T	C	0.4198	0.5802	0.00085	0.00889892	0.00277072	0.653057	rs6914280	27	GPR111	11769	intergenic	0.017	5	5	15	0	0	0
6:47612425:A:G	rs6914265	6	47612425	G	A	0.4138	0.5862	0.0018	0.00835849	0.00277161	0.639518	rs6914280	27	GPR111	11746	intergenic	3.165	5	5	15	0	0	0
6:47612450:A:G	rs6914280	6	47612450	G	A	0.4766	0.5234	7.4e-06	0.0119572	0.00274672	1	rs6914280	27	GPR111	11721	intergenic	9.409	5	5	15	0	0	0
6:47612874:G:T	rs6915491	6	47612874	T	G	0.4206	0.5794	0.00091	0.00884746	0.00277032	0.648962	rs6914280	27	GPR111	11297	intergenic	1.484	7	5	15	0	0	0
6:47624115:C:T	rs1485782	6	47624115	T	C	0.447	0.553	0.0012	0.00840719	0.00275305	0.798907	rs6914280	27	GPR111	56	upstream	3.095	4	1	15	0	0	0
6:47627621:C:T	rs9367295	6	47627621	C	T	0.4395	0.5605	0.011	0.0066277	0.00276571	0.601928	rs6914280	27	GPR111	0	intronic	1.117	5	3	15	0	0	0
6:47628751:A:G	rs6905286	6	47628751	A	G	0.4395	0.5605	0.011	0.00658507	0.00276415	0.601928	rs6914280	27	GPR111	0	intronic	NA	6	4	15	0	0	0
6:47629962:A:G	rs9381593	6	47629962	A	G	0.4395	0.5605	0.01	0.00667641	0.00276845	0.601928	rs6914280	27	GPR111	0	intronic	0.237	4	4	15	0	0	0
6:47629977:A:G	rs7752596	6	47629977	G	A	0.4395	0.5605	0.01	0.00668252	0.00276847	0.601928	rs6914280	27	GPR111	0	intronic	0.282	3a	4	15	0	0	0
6:47630077:C:T	rs7752871	6	47630077	T	C	0.4395	0.5605	0.01	0.00664691	0.002768	0.601928	rs6914280	27	GPR111	0	intronic	1.92	6	4	15	0	0	0
6:47631033:C:T	rs1976087	6	47631033	C	T	0.4395	0.5605	0.016	0.00637873	0.00278314	0.601928	rs6914280	27	GPR111	0	intronic	0.515	7	5	15	0	0	0
6:47631198:C:G	rs1963994	6	47631198	C	G	0.4644	0.5356	0.0012	0.00869989	0.00277084	0.839479	rs6914280	27	GPR111	0	UTR5	0.156	6	5	15	0	0	0
6:47631231:A:G	rs1976088	6	47631231	G	A	0.4652	0.5348	0.0012	0.00869215	0.00277121	0.842705	rs6914280	27	GPR111	0	UTR5	1.036	7	5	15	0	0	0
6:47631232:C:T	rs1963995	6	47631232	C	T	0.4652	0.5348	0.0012	0.00869215	0.00277121	0.842705	rs6914280	27	GPR111	0	UTR5	1.105	7	5	15	0	0	0
6:47631310:C:G	rs4715039	6	47631310	G	C	0.4682	0.5318	0.0014	0.00855298	0.00276881	0.864746	rs6914280	27	GPR111	0	UTR5	4.297	5	5	15	0	0	0
6:47631622:G:T	rs2396829	6	47631622	T	G	0.4614	0.5386	0.00034	0.00943057	0.00276285	0.844684	rs6914280	27	GPR111	0	intronic	0.547	2b	5	15	0	0	0
6:47632111:C:T	rs5013495	6	47632111	C	T	0.4667	0.5333	0.0013	0.00864818	0.00276694	0.812923	rs6914280	27	GPR111	0	intronic	3.137	5	5	15	0	0	0
6:47632400:A:T	rs1032146	6	47632400	T	A	0.4652	0.5348	0.0013	0.00862565	0.00276919	0.806456	rs6914280	27	GPR111	0	intronic	7.816	7	4	15	0	0	0
6:47632810:C:T	rs1032145	6	47632810	T	C	0.4652	0.5348	0.0015	0.00848751	0.00275502	0.806456	rs6914280	27	GPR111	0	intronic	6.086	NA	4	15	0	0	0
6:47633373:A:G	rs62399564	6	47633373	A	G	0.4652	0.5348	0.0013	0.00858518	0.00275598	0.806456	rs6914280	27	GPR111	0	intronic	0.366	7	4	15	0	0	0
6:47633654:C:G	rs12204192	6	47633654	G	C	0.4478	0.5522	0.0079	0.00702791	0.00276267	0.758228	rs6914280	27	GPR111	0	intronic	2.388	7	4	15	0	0	0
6:47635800:C:T	rs9367296	6	47635800	C	T	0.4697	0.5303	0.014	0.00648204	0.00277193	0.782032	rs6914280	27	GPR111	0	intronic	1.535	5	5	15	0	0	0
6:47635958:A:C	rs9349423	6	47635958	A	C	0.4523	0.5477	0.021	0.00607135	0.00276811	0.733591	rs6914280	27	GPR111	0	intronic	3.2	5	5	15	0	0	0
6:47636936:G:T	rs9369732	6	47636936	T	G	0.4735	0.5265	0.019	0.0061784	0.00275248	0.758379	rs6914280	27	GPR111	0	intronic	0.574	6	5	15	0	0	0
6:47637482:G:T	rs1385743	6	47637482	G	T	0.4743	0.5257	0.016	0.00634723	0.00275091	0.761672	rs6914280	27	GPR111	0	intronic	1.538	NA	2	15	0	0	0
6:47639083:G:T	rs6918071	6	47639083	G	T	0.475	0.525	0.027	0.00575608	0.00274403	0.75842	rs6914280	27	GPR111	0	intronic	3.335	7	2	15	0	0	0
6:47640775:C:T	rs868881	6	47640775	C	T	0.4697	0.5303	0.022	0.00596057	0.002756	0.77791	rs6914280	27	GPR111	0	intronic	2.796	NA	5	15	0	0	0
6:47641307:C:G	rs1411049	6	47641307	C	G	0.4697	0.5303	0.015	0.00621679	0.00275656	0.77791	rs6914280	27	GPR111	0	intronic	0.798	7	4	15	0	0	0
6:47642806:C:G	rs9395306	6	47642806	G	C	0.4713	0.5287	0.012	0.00650696	0.00276297	0.741093	rs6914280	27	GPR111	0	intronic	1.134	7	4	15	0	0	0
6:47642968:C:T	rs9369733	6	47642968	C	T	0.4781	0.5219	0.01	0.0066583	0.00275193	0.728687	rs6914280	27	GPR111	0	intronic	1.711	7	4	15	0	0	0
6:47644140:C:T	rs9357555	6	47644140	T	C	0.4766	0.5234	0.01	0.00666765	0.0027522	0.723023	rs6914280	27	GPR111	0	intronic	1.77	7	4	15	0	0	0
6:47645249:G:T	rs9395307	6	47645249	G	T	0.4728	0.5272	0.0077	0.00690664	0.00276086	0.746752	rs6914280	27	GPR111	0	intronic	5.251	7	4	15	0	0	0
6:47645772:G:T	rs9369734	6	47645772	T	G	0.4713	0.5287	0.036	0.00528493	0.00276457	0.741093	rs6914280	27	GPR111	0	intronic	0.057	5	4	15	0	0	0
6:47646468:C:T	rs6929227	6	47646468	C	T	0.4773	0.5227	0.012	0.00646722	0.00275036	0.72537	rs6914280	27	GPR111	0	intronic	0.362	6	4	15	0	0	0
6:47646842:A:G	rs6907125	6	47646842	G	A	0.472	0.528	0.0094	0.00672339	0.00275665	0.743472	rs6914280	27	GPR111	0	exonic	0.011	5	2	15	0	0	0
6:47647004:C:T	6:47647004	6	47647004	T	C	0.4773	0.5227	0.0092	0.00676517	0.00274904	0.72537	rs6914280	27	GPR111	0	intronic	5.796	7	2	15	0	0	0
6:47647280:A:C	rs9349424	6	47647280	A	C	0.4463	0.5537	0.022	0.00582671	0.00276542	0.719544	rs6914280	27	GPR111	0	intronic	1.211	4	2	15	0	0	0
6:47647369:A:C	rs10755753	6	47647369	A	C	0.4463	0.5537	0.02	0.00592216	0.00276407	0.719544	rs6914280	27	GPR111	0	intronic	5.262	7	2	15	0	0	0
6:47648317:C:T	rs6941294	6	47648317	C	T	0.472	0.528	0.0087	0.00680105	0.00275836	0.743472	rs6914280	27	GPR111	0	intronic	3.013	7	4	15	0	0	0
6:47648419:A:G	rs6918351	6	47648419	G	A	0.472	0.528	0.0087	0.00679751	0.00275829	0.743472	rs6914280	27	GPR111	0	intronic	14.04	7	4	15	1	1	0
6:47648508:G:T	rs6941635	6	47648508	G	T	0.472	0.528	0.0087	0.00679751	0.00275829	0.743472	rs6914280	27	GPR111	0	intronic	4.01	5	4	15	0	0	0
6:47648639:A:G	rs6919168	6	47648639	A	G	0.4713	0.5287	0.0087	0.00679751	0.00275829	0.741093	rs6914280	27	GPR111	0	intronic	8.319	4	4	15	0	0	0
6:47649573:C:T	rs10807371	6	47649573	T	C	0.4448	0.5552	0.02	0.00589723	0.00276255	0.714499	rs6914280	27	GPR111	0	exonic	8.31	5	4	15	0	0	0
6:47649574:A:G	rs10807372	6	47649574	G	A	0.4448	0.5552	0.02	0.00589723	0.00276255	0.714499	rs6914280	27	GPR111	0	exonic	7.996	5	4	15	0	0	0
6:47649694:A:G	rs9381594	6	47649694	G	A	0.4758	0.5242	0.012	0.00653882	0.00274903	0.719723	rs6914280	27	GPR111	0	exonic	20.9	5	4	15	1	1	1
6:47650722:C:T	rs9381595	6	47650722	C	T	0.4697	0.5303	0.0095	0.00671815	0.00275989	0.73548	rs6914280	27	GPR111	0	UTR3	2.912	7	4	15	0	0	0
6:47651421:G:T	rs7753583	6	47651421	G	T	0.4448	0.5552	0.02	0.00588755	0.00276383	0.714499	rs6914280	27	GPR111	0	intronic	3.587	7	5	15	0	0	0
6:47651721:A:G	rs6458589	6	47651721	A	G	0.4697	0.5303	0.038	0.00523619	0.00276214	0.73548	rs6914280	27	GPR111	0	intronic	1.662	5	5	15	0	0	0
6:47652491:C:T	rs6922662	6	47652491	C	T	0.475	0.525	0.012	0.00652572	0.00274893	0.717405	rs6914280	27	GPR111	0	intronic	NA	7	5	15	0	0	0
6:47652617:G:T	rs6900620	6	47652617	T	G	0.475	0.525	0.046	0.00502666	0.00275221	0.717405	rs6914280	27	GPR111	0	intronic	0.758	7	5	15	0	0	0
6:47652652:G:T	rs6900647	6	47652652	T	G	0.475	0.525	0.045	0.00506298	0.00275089	0.717405	rs6914280	27	GPR111	0	intronic	1.2	6	5	15	0	0	0
6:47652725:G:T	rs6923179	6	47652725	G	T	0.475	0.525	0.045	0.00506595	0.00275088	0.717405	rs6914280	27	GPR111	0	intronic	3.844	6	5	15	0	0	0
6:47652777:A:G	rs6900385	6	47652777	G	A	0.475	0.525	0.045	0.0050702	0.00275095	0.717405	rs6914280	27	GPR111	0	intronic	5.659	6	5	15	0	0	0
6:47652870:C:G	rs6900729	6	47652870	G	C	0.475	0.525	0.044	0.00508103	0.00275098	0.717405	rs6914280	27	GPR111	0	intronic	4.31	6	5	15	0	0	0
6:47653048:A:G	rs9395308	6	47653048	A	G	0.4697	0.5303	0.037	0.00526684	0.00276186	0.73548	rs6914280	27	GPR111	0	intronic	4.199	5	5	15	0	0	0
6:47653122:A:C	rs9369735	6	47653122	C	A	0.4697	0.5303	0.0089	0.00678473	0.00276198	0.73548	rs6914280	27	GPR111	0	intronic	0.607	7	5	15	0	0	0
6:47653172:A:G	rs12208284	6	47653172	G	A	0.4697	0.5303	0.01	0.00667615	0.00276536	0.734572	rs6914280	27	GPR111	0	intronic	NA	7	5	15	0	0	0
6:47653240:A:C	rs12194972	6	47653240	A	C	0.4705	0.5295	0.0075	0.00694718	0.0027643	0.737829	rs6914280	27	GPR111	0	intronic	2.679	6	5	15	0	0	0
6:47653485:A:G	rs9369736	6	47653485	G	A	0.4705	0.5295	0.0086	0.00681593	0.00276231	0.737829	rs6914280	27	GPR111	0	intronic	2.444	7	5	15	0	0	0
6:47653536:A:G	rs9381596	6	47653536	G	A	0.4705	0.5295	0.0086	0.00681367	0.00276244	0.737829	rs6914280	27	GPR111	0	intronic	0.181	7	5	15	0	0	0
6:47653851:C:T	rs9296570	6	47653851	C	T	0.4697	0.5303	0.0093	0.00673632	0.00276167	0.73548	rs6914280	27	GPR111:GPR115	00:00:00	intronic	0.648	5	5	15	0	0	0
6:47654059:A:T	rs9367297	6	47654059	A	T	0.4705	0.5295	0.0079	0.00689094	0.00276399	0.737829	rs6914280	27	GPR111:GPR115	00:00:00	intronic	6.026	6	5	15	0	0	0
6:47654173:C:T	rs9395309	6	47654173	T	C	0.4705	0.5295	0.042	0.00516215	0.00275325	0.73311	rs6914280	27	GPR111:GPR115	00:00:00	intronic	7.012	6	5	15	0	0	0
6:47654200:A:G	rs9296572	6	47654200	G	A	0.4697	0.5303	0.032	0.00541484	0.00276427	0.73548	rs6914280	27	GPR111:GPR115	00:00:00	intronic	3.475	6	5	15	0	0	0
6:47654245:A:G	rs9395310	6	47654245	A	G	0.4697	0.5303	0.031	0.00544953	0.00276371	0.73548	rs6914280	27	GPR111:GPR115	00:00:00	intronic	3.085	7	5	15	0	0	0
6:47654591:G:T	rs10948376	6	47654591	T	G	0.469	0.531	0.031	0.0054583	0.00276342	0.737874	rs6914280	27	GPR111:GPR115	00:00:00	intronic	0.833	6	5	15	0	0	0
6:47654662:A:G	rs10485315	6	47654662	G	A	0.469	0.531	0.031	0.00545162	0.00276342	0.737874	rs6914280	27	GPR111:GPR115	00:00:00	intronic	3.729	7	5	15	0	0	0
6:47654742:A:T	rs9296573	6	47654742	T	A	0.4637	0.5363	0.028	0.00557196	0.00278382	0.724638	rs6914280	27	GPR111:GPR115	00:00:00	exonic	20.8	7	5	15	1	1	0
6:47654817:A:C	rs1556133	6	47654817	A	C	0.469	0.531	0.037	0.00524533	0.0027653	0.737874	rs6914280	27	GPR111:GPR115	00:00:00	intronic	5.66	NA	5	15	0	0	0
6:47654831:A:G	rs1556132	6	47654831	G	A	0.469	0.531	0.037	0.00525702	0.00276521	0.737874	rs6914280	27	GPR111:GPR115	00:00:00	intronic	1.553	NA	5	15	0	0	0
6:47654864:G:T	rs1556131	6	47654864	G	T	0.469	0.531	0.037	0.00524858	0.00276484	0.737874	rs6914280	27	GPR111:GPR115	00:00:00	intronic	3.534	NA	5	15	0	0	0
6:47655179:C:G	rs7763980	6	47655179	G	C	0.4803	0.5197	0.022	0.00591632	0.00277053	0.69604	rs6914280	27	GPR111:GPR115	00:00:00	intronic	1.49	5	5	15	0	0	0
6:47655299:C:T	rs7764245	6	47655299	T	C	0.4803	0.5197	0.02	0.00598547	0.00277145	0.69604	rs6914280	27	GPR111:GPR115	00:00:00	intronic	3.733	4	5	15	0	0	0
6:47655330:A:T	rs7764134	6	47655330	T	A	0.4803	0.5197	0.021	0.00594696	0.00277113	0.69604	rs6914280	27	GPR111:GPR115	00:00:00	intronic	1.457	4	5	15	0	0	0
6:47655340:A:C	rs7764145	6	47655340	C	A	0.4803	0.5197	0.02	0.00597397	0.0027722	0.69604	rs6914280	27	GPR111:GPR115	00:00:00	intronic	0.123	4	5	15	0	0	0
6:47655355:C:T	rs7746442	6	47655355	C	T	0.4803	0.5197	0.02	0.00597397	0.0027722	0.69604	rs6914280	27	GPR111:GPR115	00:00:00	intronic	2.974	4	5	15	0	0	0
6:47655403:A:G	rs7764283	6	47655403	G	A	0.4803	0.5197	0.021	0.00595513	0.00277219	0.69604	rs6914280	27	GPR111:GPR115	00:00:00	intronic	3.589	3a	5	15	0	0	0
6:47655519:A:G	rs9381597	6	47655519	A	G	0.4803	0.5197	0.023	0.00586367	0.00277013	0.69604	rs6914280	27	GPR111:GPR115	00:00:00	intronic	1.768	3a	5	15	0	0	0
6:47655622:A:C	rs9367298	6	47655622	C	A	0.4796	0.5204	0.022	0.00591408	0.00277054	0.699209	rs6914280	27	GPR111:GPR115	00:00:00	intronic	0.02	6	4	15	0	0	0
6:47655830:C:T	rs12206246	6	47655830	C	T	0.4803	0.5197	0.022	0.00591126	0.00277118	0.697053	rs6914280	27	GPR111:GPR115	00:00:00	intronic	0.162	6	4	15	0	0	0
6:47656259:C:T	rs9463347	6	47656259	C	T	0.4803	0.5197	0.022	0.00586688	0.00277071	0.69604	rs6914280	27	GPR111:GPR115	00:00:00	intronic	0.147	6	4	15	0	0	0
6:47656361:A:G	rs6935212	6	47656361	A	G	0.4803	0.5197	0.021	0.00595602	0.0027693	0.69604	rs6914280	27	GPR111:GPR115	00:00:00	intronic	0.044	6	4	15	0	0	0
6:47656672:C:T	rs1980916	6	47656672	T	C	0.4803	0.5197	0.022	0.00589545	0.0027703	0.69604	rs6914280	27	GPR111:GPR115	00:00:00	intronic	4.304	NA	4	15	0	0	0
6:47656768:A:G	rs1980915	6	47656768	A	G	0.4803	0.5197	0.022	0.00589545	0.0027703	0.69604	rs6914280	27	GPR111:GPR115	00:00:00	intronic	1.551	NA	4	15	0	0	0
6:47657008:C:T	rs6458590	6	47657008	C	T	0.4803	0.5197	0.023	0.00585717	0.00277043	0.69604	rs6914280	27	GPR111:GPR115	00:00:00	intronic	3.312	7	5	15	0	0	0
6:47657026:A:G	rs6458591	6	47657026	A	G	0.4803	0.5197	0.023	0.00586475	0.00277034	0.69604	rs6914280	27	GPR111:GPR115	00:00:00	intronic	0.984	7	5	15	0	0	0
6:47657356:A:C	rs9296574	6	47657356	A	C	0.4803	0.5197	0.022	0.00590786	0.00277115	0.69604	rs6914280	27	GPR111:GPR115	00:00:00	intronic	5.267	7	5	15	0	0	0
6:47657390:C:T	rs9296575	6	47657390	T	C	0.4803	0.5197	0.022	0.00588461	0.00276997	0.69604	rs6914280	27	GPR111:GPR115	00:00:00	intronic	2.695	7	5	15	0	0	0
6:47657508:A:G	rs9296576	6	47657508	A	G	0.4803	0.5197	0.022	0.00588772	0.00276994	0.69604	rs6914280	27	GPR111:GPR115	00:00:00	intronic	8.779	6	5	15	0	0	0
6:47657591:C:T	rs9349426	6	47657591	C	T	0.4803	0.5197	0.022	0.00588714	0.00277054	0.69604	rs6914280	27	GPR111:GPR115	00:00:00	intronic	1.352	7	5	15	0	0	0
6:47657958:C:T	rs7761975	6	47657958	C	T	0.4796	0.5204	0.022	0.00589167	0.00277031	0.69373	rs6914280	27	GPR111:GPR115	00:00:00	intronic	0.318	5	5	15	0	0	0
6:47658039:C:T	rs7762124	6	47658039	C	T	0.4796	0.5204	0.021	0.0059432	0.0027712	0.69373	rs6914280	27	GPR111:GPR115	00:00:00	intronic	2.231	3a	5	15	0	0	0
6:47658737:A:G	rs9473158	6	47658737	A	G	0.4796	0.5204	0.02	0.00601497	0.00277089	0.69373	rs6914280	27	GPR111:GPR115	00:00:00	intronic	2.812	5	5	15	0	0	0
6:47658750:A:C	rs6904809	6	47658750	A	C	0.4796	0.5204	0.02	0.0059949	0.00277103	0.69373	rs6914280	27	GPR111:GPR115	00:00:00	intronic	5.269	5	5	15	0	0	0
6:47659176:C:T	rs6932547	6	47659176	C	T	0.4781	0.5219	0.026	0.0056654	0.00276498	0.688136	rs6914280	27	GPR111:GPR115	00:00:00	intronic	2.642	7	5	15	0	0	0
6:47659816:A:C	rs997430	6	47659816	A	C	0.4788	0.5212	0.026	0.00566036	0.00276451	0.691442	rs6914280	27	GPR111:GPR115	00:00:00	intronic	4.559	NA	5	15	0	0	0
6:47660202:A:G	rs4112771	6	47660202	A	G	0.4614	0.5386	0.034	0.00537807	0.0027665	0.652869	rs6914280	27	GPR111:GPR115	00:00:00	intronic	1.498	7	5	15	0	0	0
6:91197382:G:T	rs806282	6	91197382	T	G	0.264	0.736	4.8e-07	0.0151546	0.00303586	0.812115	rs284509	28	MAP3K7	25909	intergenic	0.942	6	5	15	0	0	0
6:91202195:A:G	6:91202195	6	91202195	A	G	0.1573	0.8427	0.00097	0.0116926	0.0035505	0.641813	rs284509	28	MAP3K7	21096	intergenic	3.282	7	5	15	0	0	0
6:91202521:A:T	rs466479	6	91202521	T	A	0.1573	0.8427	0.00096	0.0116998	0.00355056	0.641813	rs284509	28	MAP3K7	20770	intergenic	0.55	5	5	15	0	0	0
6:91204215:A:G	rs806272	6	91204215	A	G	0.2799	0.7201	3.6e-06	0.0136313	0.00297699	0.763681	rs284509	28	MAP3K7	19076	intergenic	5.819	4	2	15	0	0	0
6:91207609:A:G	rs284508	6	91207609	G	A	0.1581	0.8419	0.0014	0.0113515	0.00356884	0.644552	rs284509	28	MAP3K7	15682	intergenic	1.646	5	5	15	0	0	0
6:91208376:G:T	rs284509	6	91208376	G	T	0.2307	0.7693	5.3e-08	0.0174122	0.00320198	1	rs284509	28	MAP3K7	14915	intergenic	3.976	6	5	15	0	0	0
6:91208542:C:T	rs284511	6	91208542	C	T	0.2368	0.7632	6.8e-08	0.0170593	0.00318506	0.961024	rs284509	28	MAP3K7	14749	intergenic	1.283	6	5	15	0	0	0
6:91209111:C:T	rs182259	6	91209111	T	C	0.2307	0.7693	1.7e-07	0.0164962	0.00318342	1	rs284509	28	MAP3K7	14180	intergenic	1.96	7	5	15	0	0	0
7:22261333:A:G	rs12700362	7	22261333	A	G	0.06581	0.93419	5.3e-05	0.0244729	0.00609257	0.650111	rs16873183	29	RAPGEF5	0	intronic	7.28	7	4	15	0	0	0
7:22262596:A:G	rs12671750	7	22262596	A	G	0.06581	0.93419	3.7e-05	0.0248776	0.00607651	0.650111	rs16873183	29	RAPGEF5	0	intronic	1.228	7	4	15	0	0	0
7:22267209:A:G	rs13226010	7	22267209	A	G	0.06581	0.93419	3.8e-05	0.0249312	0.00608224	0.650111	rs16873183	29	RAPGEF5	0	intronic	1.075	7	4	15	0	0	0
7:22268562:A:G	rs16873183	7	22268562	A	G	0.04312	0.95688	3.2e-06	0.0321902	0.00690726	1	rs16873183	29	RAPGEF5	0	intronic	0.616	7	4	15	0	0	0
7:37388544:C:T	rs16879644	7	37388544	C	T	0.1384	0.8616	9.7e-05	0.0146658	0.00371034	0.683431	rs1987067	30	ELMO1	0	intronic	2.075	4	2	15	0	0	0
7:37397262:C:T	rs13247953	7	37397262	T	C	0.1641	0.8359	1.6e-05	0.0152183	0.00350746	0.78501	rs1987067	30	ELMO1	0	intronic	7.91	3a	2	15	0	0	0
7:37401418:A:T	rs62462587	7	37401418	T	A	0.1581	0.8419	5.3e-06	0.0163616	0.00355798	0.823534	rs1987067	30	ELMO1	0	intronic	NA	6	5	15	0	0	0
7:37401746:G:T	rs13233519	7	37401746	G	T	0.1399	0.8601	2.5e-05	0.0157803	0.00369699	0.720564	rs1987067	30	ELMO1	0	intronic	13.1	7	5	15	1	0	0
7:37403648:C:T	rs2392495	7	37403648	T	C	0.1505	0.8495	6e-06	0.0166956	0.00362024	0.874968	rs1987067	30	ELMO1	0	intronic	2.159	4	2	15	0	0	0
7:37407552:A:G	rs10233634	7	37407552	A	G	0.1641	0.8359	3.7e-06	0.016476	0.00348081	0.963992	rs1987067	30	ELMO1	0	intronic	1.54	6	5	15	0	0	0
7:37412146:C:T	rs4723646	7	37412146	C	T	0.171	0.829	4.4e-06	0.0161147	0.00343972	0.918199	rs1987067	30	ELMO1	0	intronic	0.922	5	5	15	0	0	0
7:37414537:C:T	rs1987067	7	37414537	T	C	0.1694	0.8306	3.1e-06	0.0164307	0.00345568	1	rs1987067	30	ELMO1	0	intronic	0.056	7	5	15	0	0	0
7:37415057:A:G	rs9969311	7	37415057	A	G	0.1778	0.8222	5.2e-06	0.0158288	0.0034139	0.945027	rs1987067	30	ELMO1	0	intronic	0.048	7	4	15	0	0	0
7:37415288:C:T	rs17136677	7	37415288	T	C	0.1422	0.8578	1.8e-05	0.015933	0.0036648	0.743498	rs1987067	30	ELMO1:RPS10P14	00:00:00	ncRNA_exonic	4.055	5	4	15	0	0	0
7:37417737:C:T	rs10268944	7	37417737	C	T	0.1891	0.8109	1e-05	0.0150684	0.00336283	0.878416	rs1987067	30	ELMO1	0	intronic	2.096	7	5	15	0	0	0
7:37417760:C:G	rs10253553	7	37417760	C	G	0.1884	0.8116	2.1e-05	0.01458	0.00337465	0.882696	rs1987067	30	ELMO1	0	intronic	2.291	7	5	15	0	0	0
7:37420829:C:G	rs17171016	7	37420829	C	G	0.1475	0.8525	3.3e-05	0.0153793	0.00365328	0.718308	rs1987067	30	ELMO1	0	intronic	0.269	6	5	15	0	0	0
7:37422138:G:T	rs6968878	7	37422138	G	T	0.1467	0.8533	2.5e-05	0.0156407	0.00365473	0.723251	rs1987067	30	ELMO1	0	intronic	14.67	4	5	15	1	0	1
7:37423669:C:G	rs59508120	7	37423669	G	C	0.146	0.854	2.1e-05	0.0157524	0.00365426	0.708471	rs1987067	30	ELMO1	0	intronic	1.116	6	5	15	0	0	0
7:137998070:A:G	rs145985891	7	137998070	A	G	0.3608	0.6392	0.03	0.00617919	0.00290683	0.689117	rs357444	31	AC008155.2	14840	intergenic	9.264	6	5	15	0	0	0
7:137998071:A:C	rs139878718	7	137998071	A	C	0.3601	0.6399	0.031	0.00615695	0.00290638	0.692828	rs357444	31	AC008155.2	14841	intergenic	9.007	6	5	15	0	0	0
7:138001551:A:G	rs6467762	7	138001551	G	A	0.3608	0.6392	0.042	0.00576088	0.00285156	0.689117	rs357444	31	AC008155.2	18321	intergenic	11.14	3a	2	15	0	0	0
7:138004338:A:G	rs7793617	7	138004338	A	G	0.3608	0.6392	0.035	0.00599445	0.00284055	0.695557	rs357444	31	AC008155.2	21108	intergenic	8.483	6	5	15	0	0	0
7:138004971:A:C	rs112057095	7	138004971	C	A	0.3616	0.6384	0.035	0.00598072	0.00285025	0.703006	rs357444	31	AC008155.2	21741	intergenic	0.675	7	5	15	0	0	0
7:138006598:A:G	rs59324490	7	138006598	A	G	0.3631	0.6369	0.0013	0.00893823	0.0028689	0.683591	rs357444	31	AC008155.2	23368	intergenic	0.019	7	5	15	0	0	0
7:138006883:C:T	rs113305689	7	138006883	T	C	0.3578	0.6422	0.0026	0.00853247	0.00285895	0.718578	rs357444	31	AC008155.2	23653	intergenic	0.176	7	5	15	0	0	0
7:138007001:A:G	rs357387	7	138007001	G	A	0.3775	0.6225	0.0021	-0.00857456	0.00284463	0.794887	rs357444	31	AC008155.2	23771	intergenic	0.251	NA	5	15	0	0	0
7:138007720:C:T	rs1691717	7	138007720	C	T	0.3775	0.6225	0.0024	-0.00847357	0.00284017	0.794339	rs357444	31	AC008155.2	24490	intergenic	1.493	NA	5	15	0	0	0
7:138008208:A:G	rs12707380	7	138008208	G	A	0.3812	0.6188	0.0023	-0.00850468	0.00283373	0.801438	rs357444	31	AC008155.2	24978	intergenic	2.785	6	5	15	0	0	0
7:138008890:C:T	rs376305	7	138008890	C	T	0.3775	0.6225	0.0026	-0.00840457	0.00283956	0.794339	rs357444	31	AC008155.2	25660	intergenic	0.16	7	5	15	0	0	0
7:138015092:A:G	rs357453	7	138015092	G	A	0.4455	0.5545	2.7e-05	-0.0112171	0.0027448	0.734928	rs357444	31	AC008155.2	31862	intergenic	0.215	NA	8	15	0	0	0
7:138016979:A:C	7:138016979	7	138016979	A	C	0.3707	0.6293	0.00043	0.00985354	0.00281863	0.772656	rs357444	31	AC008155.2	33749	intergenic	4.068	6	8	9	0	0	0
7:138017980:C:T	rs357452	7	138017980	C	T	0.4032	0.5968	5.6e-05	-0.010988	0.00279	0.892348	rs357444	31	AC008155.2	34750	intergenic	3.667	NA	8	9	0	0	0
7:138020998:A:C	rs357444	7	138020998	C	A	0.4266	0.5734	5.7e-06	-0.0123291	0.00273626	1	rs357444	31	AC008155.2	37768	intergenic	1.237	NA	5	15	0	0	0
7:138022754:C:T	rs357441	7	138022754	T	C	0.4977	0.5023	1.5e-05	-0.0112038	0.00268504	0.704544	rs357444	31	AC008155.2	39524	intergenic	3.58	NA	5	15	0	0	0
7:138028367:A:G	rs357431	7	138028367	G	A	0.4372	0.5628	7e-06	-0.012016	0.00273683	0.873125	rs357444	31	AC008155.2	45137	intergenic	4.625	NA	9	9	0	0	0
7:138033826:C:T	rs357419	7	138033826	C	T	0.472	0.528	0.00011	-0.0103393	0.00273097	0.76247	rs357444	31	AC008155.2	50596	intergenic	2.18	NA	7	15	0	0	0
7:138034061:C:T	rs1963350	7	138034061	T	C	0.4017	0.5983	0.015	0.00674876	0.00279502	0.639352	rs357444	31	AC008155.2	50831	intergenic	0.121	NA	5	15	0	0	0
7:138036895:A:G	rs112696241	7	138036895	A	G	0.3601	0.6399	0.0045	0.00801203	0.00284969	0.69588	rs357444	31	AC008155.1	52044	intergenic	0.008	7	7	15	0	0	0
8:8427094:A:G	rs139737126	8	8427094	A	G	0.01135	0.98865	3.8e-06	-0.0413609	0.009331	1	rs139737126	32	CTD-3023L14.2	0	ncRNA_exonic	0.375	5	4	15	0	0	0
8:24868071:C:T	rs2976457	8	24868071	C	T	0.2595	0.7405	0.00056	0.0107549	0.00317652	0.678384	rs2320782	33	CTD-2168K21.1	778	downstream	9.972	NA	1	14	0	0	0
8:24872572:A:G	rs2950322	8	24872572	G	A	0.2572	0.7428	0.00051	0.0108349	0.00317701	0.679506	rs2320782	33	CTD-2168K21.1	5279	intergenic	4.941	7	14	15	0	0	0
8:24875950:G:T	rs2950328	8	24875950	G	T	0.2557	0.7443	0.00044	-0.0109734	0.00317943	0.691737	rs2320782	33	CTD-2168K21.1	8657	intergenic	3.544	6	9	15	0	0	0
8:24878255:A:G	rs2976445	8	24878255	G	A	0.2557	0.7443	0.0004	-0.011058	0.00318122	0.684125	rs2320782	33	CTD-2168K21.1	10962	intergenic	0.562	NA	9	15	0	0	0
8:24882652:C:G	rs2976448	8	24882652	C	G	0.2549	0.7451	0.00034	-0.0111951	0.00318	0.69227	rs2320782	33	CTD-2168K21.1	15359	intergenic	0.567	6	5	15	0	0	0
8:24882827:G:T	rs6557797	8	24882827	G	T	0.2549	0.7451	0.00031	-0.0112823	0.00318079	0.69227	rs2320782	33	CTD-2168K21.1	15534	intergenic	4.635	7	5	15	0	0	0
8:24884065:A:T	rs2976451	8	24884065	A	T	0.2975	0.7025	0.024	-0.00651928	0.00293957	0.680495	rs2320782	33	CTD-2168K21.1	16772	intergenic	2.75	6	5	15	0	0	0
8:24889912:C:T	rs1527033	8	24889912	C	T	0.2337	0.7663	0.00046	-0.0111206	0.0032215	0.833528	rs2320782	33	CTD-2168K21.1	22619	intergenic	1.819	6	5	15	0	0	0
8:24892440:A:G	rs4872283	8	24892440	A	G	0.2337	0.7663	0.00048	-0.0110693	0.00321885	0.848044	rs2320782	33	CTD-2168K21.1	25147	intergenic	1.304	7	5	15	0	0	0
8:24892833:C:T	rs4425762	8	24892833	T	C	0.2337	0.7663	0.00053	-0.0109933	0.00321881	0.848044	rs2320782	33	CTD-2168K21.1	25540	intergenic	1.387	7	5	15	0	0	0
8:24896797:C:T	rs4872285	8	24896797	C	T	0.2118	0.7882	0.00028	-0.0121854	0.00335734	0.756908	rs2320782	33	CTD-2168K21.1	29504	intergenic	0.799	7	5	15	0	0	0
8:24915220:G:T	rs2320782	8	24915220	G	T	0.2368	0.7632	8.4e-06	-0.0140684	0.00319227	1	rs2320782	33	CTD-2168K21.1	47927	intergenic	2.687	5	14	15	0	0	0
8:24924178:A:G	rs11135840	8	24924178	G	A	0.2428	0.7572	0.00012	-0.0118935	0.00310779	0.807618	rs2320782	33	CTD-2168K21.1	56885	intergenic	0.777	5	5	15	0	0	0
8:24925058:C:T	rs7017203	8	24925058	T	C	0.2451	0.7549	0.0002	-0.0114494	0.00309476	0.793105	rs2320782	33	CTD-2168K21.1	57765	intergenic	10.11	5	5	15	0	0	0
8:24925366:C:G	rs9314297	8	24925366	C	G	0.2443	0.7557	0.00034	-0.0111033	0.00312615	0.788649	rs2320782	33	CTD-2168K21.1	58073	intergenic	0.117	7	5	15	0	0	0
8:61811764:C:T	rs10156284	8	61811764	C	T	0.2383	0.7617	7e-06	-0.0143775	0.00311878	1	rs10156284	34	RP11-33I11.3	6853	intergenic	1.302	5	5	15	0	0	0
8:70649250:A:T	rs149792031	8	70649250	T	A	0.0295	0.9705	0.0012	-0.0363355	0.0107901	0.601259	rs140697675	35	SLCO5A1	0	intronic	1.54	7	5	15	0	0	0
8:70651409:C:T	rs150322811	8	70651409	C	T	0.0295	0.9705	0.00057	-0.0375794	0.0105394	0.601259	rs140697675	35	SLCO5A1	0	intronic	2.862	6	5	15	0	0	0
8:70654794:A:C	rs142027846	8	70654794	C	A	0.0295	0.9705	0.00071	-0.0369648	0.0105439	0.601259	rs140697675	35	SLCO5A1	0	intronic	0.789	7	5	15	0	0	0
8:70654835:A:G	rs145899454	8	70654835	A	G	0.0295	0.9705	0.0007	-0.0369055	0.0105098	0.601259	rs140697675	35	SLCO5A1	0	intronic	8.583	7	5	15	0	0	0
8:70663296:C:T	rs114064211	8	70663296	T	C	0.03555	0.96445	0.0001	-0.0428043	0.0106448	0.733319	rs140697675	35	SLCO5A1	0	intronic	11.72	6	5	15	0	0	0
8:70665972:A:G	rs147763111	8	70665972	G	A	0.0416	0.9584	0.037	-0.0144293	0.00717596	0.620451	rs140697675	35	SLCO5A1	0	intronic	0.218	7	5	15	0	0	0
8:70666512:C:G	rs116787637	8	70666512	C	G	0.03555	0.96445	0.00011	-0.042751	0.0106587	0.733319	rs140697675	35	SLCO5A1	0	intronic	1.131	6	5	15	0	0	0
8:70666997:C:T	rs116044302	8	70666997	C	T	0.03555	0.96445	0.00011	-0.0427885	0.0106693	0.733319	rs140697675	35	SLCO5A1	0	intronic	9.422	6	5	15	0	0	0
8:70667399:C:G	rs140380300	8	70667399	G	C	0.03555	0.96445	0.00011	-0.0427873	0.0106721	0.733319	rs140697675	35	SLCO5A1	0	intronic	3.322	6	5	15	0	0	0
8:70668443:C:T	rs143914022	8	70668443	T	C	0.03555	0.96445	0.00011	-0.0426804	0.0106732	0.733319	rs140697675	35	SLCO5A1	0	intronic	4.889	7	5	15	0	0	0
8:70669248:C:T	rs114882758	8	70669248	T	C	0.0348	0.9652	0.00012	-0.0426211	0.0106692	0.750073	rs140697675	35	SLCO5A1	0	intronic	0.894	6	5	15	0	0	0
8:70670065:C:T	8:70670065	8	70670065	T	C	0.03026	0.96974	0.00014	-0.0420024	0.0106196	0.867358	rs140697675	35	SLCO5A1	0	intronic	6.965	5	5	15	0	0	0
8:70683640:A:T	rs140697675	8	70683640	A	T	0.0348	0.9652	8.6e-06	-0.0474406	0.0103461	1	rs140697675	35	SLCO5A1	0	intronic	5.26	7	5	15	0	0	0
8:129492156:A:G	rs116216559	8	129492156	A	G	0.02648	0.97352	8.1e-06	-0.0354135	0.00800316	1	rs116216559	36	RP11-89M16.1	0	ncRNA_intronic	1.887	7	5	15	0	0	0
8:138239862:G:T	rs13282991	8	138239862	T	G	0.1831	0.8169	8.9e-06	-0.0161259	0.00358081	1	rs13282991	37	RNU6-144P	122160	intergenic	0.372	7	5	15	0	0	0
8:143661671:A:C	rs183361352	8	143661671	A	C	0.01135	0.98865	8.4e-06	-0.0676319	0.0153167	1	rs183361352	38	MROH4P	8304	intergenic	3.877	5	5	15	0	0	0
9:38487113:C:T	rs12350396	9	38487113	C	T	0.1505	0.8495	8.2e-06	-0.018417	0.0039868	1	rs12350396	39	RP11-392E22.1	0	ncRNA_exonic	1.91	5	5	15	0	0	0
9:109550497:A:G	rs7870572	9	109550497	A	G	0.2451	0.7549	3.5e-05	0.013032	0.00311795	0.915227	rs13292392	40	RNA5SP292	55532	intergenic	0.275	5	5	15	0	0	0
9:109550499:A:G	rs7870269	9	109550499	G	A	0.2708	0.7292	0.0008	0.0104145	0.00306019	0.813341	rs13292392	40	RNA5SP292	55530	intergenic	2.244	5	5	15	0	0	0
9:109550508:C:T	rs7856638	9	109550508	C	T	0.2466	0.7534	7.4e-05	0.0125446	0.00313112	0.916255	rs13292392	40	RNA5SP292	55521	intergenic	0.471	5	5	15	0	0	0
9:109551109:G:T	rs12350959	9	109551109	T	G	0.2451	0.7549	6.2e-05	0.0126716	0.00313162	0.930871	rs13292392	40	RNA5SP292	54920	intergenic	0.871	7	5	15	0	0	0
9:109551330:C:T	rs13292392	9	109551330	C	T	0.2315	0.7685	4.9e-06	0.015345	0.00325882	1	rs13292392	40	RNA5SP292	54699	intergenic	3.812	7	5	15	0	0	0
9:109551450:C:T	rs10978640	9	109551450	C	T	0.08472	0.91528	4.6e-06	0.0215063	0.00461945	1	rs10978640	40	RNA5SP292	54579	intergenic	4.121	7	5	15	0	0	0
9:109551468:A:G	rs55766326	9	109551468	G	A	0.2307	0.7693	5.2e-06	0.015376	0.00327578	0.995814	rs13292392	40	RNA5SP292	54561	intergenic	4.38	7	5	15	0	0	0
9:114382435:G:T	rs10817196	9	114382435	G	T	0.4365	0.5635	6.7e-06	0.0123228	0.00276542	0.958657	rs7875749	41	LRRC37A5P	0	ncRNA_intronic	1.975	4	5	15	0	0	0
9:114382444:A:G	rs10817197	9	114382444	A	G	0.4372	0.5628	4.8e-06	0.0124361	0.00275339	0.955743	rs7875749	41	LRRC37A5P	0	ncRNA_intronic	1.617	1f	5	15	0	0	0
9:114383053:A:C	rs6477833	9	114383053	C	A	0.4266	0.5734	6.9e-06	0.0123087	0.0027653	0.990892	rs7875749	41	LRRC37A5P	0	ncRNA_intronic	0.062	6	5	15	0	0	0
9:114387135:A:G	rs7875749	9	114387135	G	A	0.4274	0.5726	4.3e-06	0.0125672	0.00276096	1	rs7875749	41	LRRC37A5P	0	ncRNA_intronic	3.613	6	5	15	0	0	0
10:55122266:G:T	rs41391044	10	55122266	G	T	0.1475	0.8525	4.5e-06	-0.0176253	0.00388632	1	rs41391044	42	RP11-71J2.1	51440	intergenic	0.763	6	5	15	0	0	0
10:101831648:A:G	rs113498520	10	101831648	A	G	0.03101	0.96899	8.9e-06	-0.0310361	0.0070638	1	rs113498520	43	CPN1	0	intronic	1.948	6	4	15	0	0	0
10:101834040:G:T	rs112369866	10	101834040	T	G	0.03101	0.96899	9.5e-06	-0.0308208	0.00703857	1	rs112369866	43	CPN1	0	intronic	1.713	7	4	15	0	0	0
10:101858616:A:G	rs113028917	10	101858616	G	A	0.03253	0.96747	8.8e-06	-0.0310087	0.00705354	1	rs113028917	43	TPM4P1	15557	intergenic	5.202	7	5	15	0	0	0
10:101875425:C:T	rs140639135	10	101875425	T	C	0.03101	0.96899	5.2e-06	-0.031859	0.00706526	1	rs140639135	43	TPM4P1	444	upstream	0.734	6	5	14	0	0	0
10:101890903:A:G	rs113255414	10	101890903	G	A	0.03101	0.96899	6.8e-06	-0.0314279	0.00705872	1	rs113255414	43	RP11-316M21.9	11918	intergenic	2.599	5	7	15	0	0	0
10:108759228:A:T	rs11193156	10	108759228	A	T	0.1339	0.8661	1.3e-07	-0.0241311	0.00458535	1	rs11193156	44	SORCS1	0	intronic	19.34	3a	5	15	1	0	1
10:126740834:A:T	rs115805226	10	126740834	T	A	0.1044	0.8956	8.6e-06	0.0212932	0.00466181	1	rs115805226	45	CTBP2	0	intronic	1.713	5	4	5	0	0	0
11:7921931:A:G	11:7921931	11	7921931	A	G	0.1384	0.8616	9.5e-06	0.0174421	0.00393054	1	11:7921931	46	RP11-494M8.4	0	ncRNA_intronic	0.079	7	4	15	0	0	0
11:91166169:A:G	rs7952480	11	91166169	A	G	0.3949	0.6051	0.0003	-0.0108973	0.00292715	0.92219	rs7951474	47	RP11-699F16.2	265706	intergenic	NA	7	9	15	0	0	0
11:91171295:A:G	rs7951474	11	91171295	A	G	0.3759	0.6241	9.9e-06	-0.0133507	0.00295809	1	rs7951474	47	RP11-699F16.2	270832	intergenic	1.351	7	9	15	0	0	0
11:91177791:A:G	rs1394530	11	91177791	G	A	0.3699	0.6301	0.0032	-0.00889141	0.00294768	0.811019	rs7951474	47	RP11-699F16.2	277328	intergenic	3.963	5	9	15	0	0	0
12:24396197:A:G	rs74068466	12	24396197	G	A	0.05749	0.94251	4.4e-06	-0.0237028	0.00531357	1	rs74068466	48	RP11-444D3.1	0	ncRNA_intronic	1.273	6	5	15	0	0	0
12:24396264:A:G	rs76512429	12	24396264	A	G	0.04312	0.95688	0.0052	-0.0202117	0.00723859	0.713085	rs74068466	48	RP11-444D3.1	0	ncRNA_intronic	0.704	7	5	15	0	0	0
12:24398974:C:T	rs74068467	12	24398974	C	T	0.08245	0.91755	0.0015	-0.0141458	0.00458113	0.6643	rs74068466	48	RP11-444D3.1	0	ncRNA_intronic	0.709	6	5	15	0	0	0
12:83647444:C:T	rs12580743	12	83647444	C	T	0.3608	0.6392	2.9e-06	0.0131023	0.00288838	1	rs12580743	49	RP11-87P13.2	80924	intergenic	2.085	6	9	15	0	0	0
13:27636336:C:T	rs112120989	13	27636336	T	C	0.02345	0.97655	1.1e-07	-0.0413334	0.00778153	0.933455	rs56940748	50	USP12	3956	intergenic	3.303	7	5	15	0	0	0
13:27661417:C:T	rs542629237	13	27661417	C	T	0.03026	0.96974	3.5e-07	-0.0378934	0.00744458	0.763929	rs56940748	50	USP12	0	intronic	2.276	NA	4	5	0	0	0
13:27662100:A:G	rs56940748	13	27662100	A	G	0.02345	0.97655	8.4e-08	-0.0449343	0.00829621	1	rs56940748	50	USP12	0	intronic	3.489	7	4	5	0	0	0
13:27663613:C:T	rs73497361	13	27663613	C	T	0.02345	0.97655	8.7e-08	-0.0448418	0.0082875	1	rs56940748	50	USP12	0	intronic	3.383	5	4	5	0	0	0
13:27674519:A:G	rs73497373	13	27674519	G	A	0.02572	0.97428	1e-06	-0.0393805	0.00795882	0.907423	rs56940748	50	USP12	0	intronic	2.02	7	4	5	0	0	0
13:27693544:A:G	rs73497397	13	27693544	A	G	0.02269	0.97731	3.6e-06	-0.0401772	0.00854523	0.774094	rs56940748	50	USP12	0	intronic	2.287	4	2	5	0	0	0
13:27694455:G:T	rs60672263	13	27694455	T	G	0.02345	0.97655	6.2e-06	-0.0384277	0.00835302	0.747565	rs56940748	50	USP12	0	intronic	2.45	5	5	5	0	0	0
13:27696507:A:G	rs59419270	13	27696507	G	A	0.02345	0.97655	5.4e-06	-0.0387545	0.00837335	0.747565	rs56940748	50	USP12	0	intronic	2.816	5	5	5	0	0	0
13:27711557:A:G	rs73499314	13	27711557	G	A	0.02194	0.97806	5.7e-06	-0.0390145	0.0084454	0.802453	rs56940748	50	USP12	0	intronic	6.275	6	5	5	0	0	0
13:27727520:C:T	rs77912463	13	27727520	C	T	0.02118	0.97882	3.2e-06	-0.0415274	0.00880458	0.898945	rs56940748	50	USP12	0	intronic	0.022	6	5	15	0	0	0
13:30178038:A:C	rs147493529	13	30178038	A	C	0.0348	0.9652	4.7e-06	0.0283822	0.00611664	1	rs147493529	51	SLC7A1	8212	intergenic	2.075	6	13	15	0	0	0
13:30187122:A:T	rs11840911	13	30187122	A	T	0.04236	0.95764	1.2e-05	0.0273191	0.00612916	0.617695	rs147493529	51	SLC7A1	17296	intergenic	5.151	6	9	15	0	0	0
13:30267343:C:T	rs145245021	13	30267343	C	T	0.02723	0.97277	0.0001	0.0262702	0.00665958	0.694879	rs147493529	51	UBL3	71164	intergenic	2.659	7	5	15	0	0	0
13:30291537:G:T	rs114371422	13	30291537	T	G	0.03026	0.96974	7.3e-05	0.0265314	0.00659966	0.73973	rs147493529	51	UBL3	46970	intergenic	0.709	7	5	15	0	0	0
13:38101807:C:T	rs17055963	13	38101807	C	T	0.04917	0.95083	0.00011	-0.021032	0.00568127	0.713174	rs17055969	52	POSTN	34912	intergenic	1.944	7	7	15	0	0	0
13:38102337:C:G	rs71439728	13	38102337	C	G	0.04917	0.95083	6.1e-05	-0.0229557	0.00589915	0.713174	rs17055969	52	POSTN	34382	intergenic	0.353	7	5	15	0	0	0
13:38102450:A:G	rs17055969	13	38102450	G	A	0.06808	0.93192	3.9e-06	-0.022975	0.00512677	1	rs17055969	52	POSTN	34269	intergenic	2.616	6	5	15	0	0	0
13:38102990:C:T	rs7334289	13	38102990	T	C	0.0764	0.9236	7.8e-05	-0.0193298	0.00499284	0.703531	rs17055969	52	POSTN	33729	intergenic	0.802	7	5	15	0	0	0
13:38103577:C:T	rs2025245	13	38103577	T	C	0.06354	0.93646	5.1e-05	-0.0206745	0.00526769	0.88239	rs17055969	52	POSTN	33142	intergenic	2.025	5	5	15	0	0	0
13:38103680:C:T	rs2025244	13	38103680	T	C	0.06203	0.93797	6.7e-05	-0.0203216	0.00527497	0.90578	rs17055969	52	POSTN	33039	intergenic	0.953	NA	5	15	0	0	0
13:38108472:C:T	rs9315500	13	38108472	C	T	0.04917	0.95083	0.00013	-0.0208762	0.00568128	0.713174	rs17055969	52	POSTN	28247	intergenic	2.116	2a	1	15	0	0	0
14:25963324:A:G	rs112423956	14	25963324	G	A	0.02496	0.97504	1.1e-05	-0.0541542	0.0122194	0.970065	rs77008653	53	RP11-388G3.1	61883	intergenic	4.018	6	9	15	0	0	0
14:25972956:A:G	rs77008653	14	25972956	G	A	0.02421	0.97579	1.7e-06	-0.0654328	0.013397	1	rs77008653	53	RP11-388G3.1	71515	intergenic	14.07	7	9	15	0	0	0
14:91085492:C:G	rs111677446	14	91085492	G	C	0.03253	0.96747	6.8e-06	0.0459463	0.0102755	1	rs111677446	54	TTC7B	0	intronic	5.835	6	4	5	0	0	0
14:91090701:C:T	rs74081244	14	91090701	T	C	0.05219	0.94781	0.00089	0.0224587	0.00684678	0.608676	rs111677446	54	TTC7B	0	intronic	8.776	2b	2	5	0	0	0
15:98402854:A:G	rs28517365	15	98402854	G	A	0.1278	0.8722	7.6e-06	-0.0173352	0.00384311	1	rs28517365	55	LINC00923	0	intronic	1.66	5	5	15	0	0	0
16:11923353:A:C	rs77488845	16	11923353	C	A	0.01891	0.98109	5.5e-05	-0.0426451	0.0106487	0.828597	rs149925099	56	BCAR4	650	upstream	2.026	5	5	15	0	0	0
16:11923354:A:C	rs79093858	16	11923354	A	C	0.01891	0.98109	5.5e-05	-0.0426451	0.0106487	0.828597	rs149925099	56	BCAR4	651	upstream	5.15	5	5	15	0	0	0
16:11923678:C:T	rs35472410	16	11923678	T	C	0.01891	0.98109	5.7e-05	-0.0425881	0.0106488	0.828597	rs149925099	56	BCAR4	975	upstream	4.043	7	5	15	0	0	0
16:11923707:A:C	rs148040184	16	11923707	A	C	0.01815	0.98185	7e-06	-0.0506145	0.0114004	0.862047	rs149925099	56	BCAR4	1004	intergenic	3.842	5	5	15	0	0	0
16:11934450:A:T	rs76495819	16	11934450	T	A	0.0174	0.9826	5.4e-06	-0.0506195	0.0112628	0.827829	rs149925099	56	RSL1D1	0	intronic	2.765	5	4	4	0	0	0
16:11939982:A:G	rs148922147	16	11939982	A	G	0.02345	0.97655	2e-05	-0.0403887	0.00951077	0.617256	rs149925099	56	RSL1D1	0	intronic	3.652	7	4	4	0	0	0
16:11942626:C:G	rs75880802	16	11942626	G	C	0.02345	0.97655	1.6e-05	-0.039842	0.00929623	0.617256	rs149925099	56	RSL1D1	0	intronic	0.781	5	3	4	0	0	0
16:11944692:A:G	rs150396509	16	11944692	A	G	0.02345	0.97655	1.6e-05	-0.0405605	0.00943894	0.617256	rs149925099	56	RSL1D1	0	intronic	2.517	5	1	1	0	0	0
16:11951737:G:T	rs74010441	16	11951737	G	T	0.02648	0.97352	4.4e-06	-0.0406079	0.0088214	0.7477	rs149925099	56	RP11-166B2.8	0	ncRNA_intronic	3.593	7	4	5	0	0	0
16:11951817:C:T	rs16958700	16	11951817	C	T	0.02648	0.97352	4.4e-06	-0.0406079	0.0088214	0.7477	rs149925099	56	RP11-166B2.8	0	ncRNA_intronic	0.64	6	4	5	0	0	0
16:11957682:A:T	rs139890946	16	11957682	T	A	0.02194	0.97806	1.6e-06	-0.0489347	0.0102368	0.966414	rs149925099	56	RP11-166B2.8	0	ncRNA_intronic	1.399	5	5	5	0	0	0
16:11959791:C:T	rs192067248	16	11959791	C	T	0.0174	0.9826	2.8e-06	-0.0508341	0.0109789	0.827829	rs149925099	56	RP11-166B2.8	0	ncRNA_intronic	1.25	5	5	5	0	0	0
16:11964753:A:G	rs142126449	16	11964753	G	A	0.0174	0.9826	3e-06	-0.0505783	0.0109592	0.827829	rs149925099	56	RP11-166B2.8:GSPT1	00:00:00	ncRNA_intronic	18.75	5	4	5	1	0	0
16:11970224:C:T	rs537945226	16	11970224	T	C	0.02118	0.97882	1.7e-06	-0.0473941	0.00994214	1	rs149925099	56	RP11-166B2.8:GSPT1	00:00:00	ncRNA_intronic	6.728	NA	4	4	0	0	0
16:11970369:C:T	rs149925099	16	11970369	T	C	0.02118	0.97882	1.6e-06	-0.0482206	0.0100891	1	rs149925099	56	RP11-166B2.8:GSPT1	00:00:00	ncRNA_intronic	4.167	5	4	4	0	0	0
16:11973456:G:T	rs142637892	16	11973456	T	G	0.0174	0.9826	3.1e-06	-0.0498705	0.010819	0.827829	rs149925099	56	RP11-166B2.8:GSPT1	00:00:00	ncRNA_intronic	6.158	6	4	4	0	0	0
16:11976096:C:T	rs146020021	16	11976096	T	C	0.02194	0.97806	1.7e-06	-0.0468775	0.00984624	0.966414	rs149925099	56	RP11-166B2.8:GSPT1:RP11-166B2.3	00:00:00	ncRNA_exonic	2.973	5	4	4	0	0	0
16:12006457:A:C	rs146346583	16	12006457	A	C	0.02042	0.97958	3.7e-06	-0.0466515	0.0101095	0.897284	rs149925099	56	GSPT1	0	intronic	4.749	5	1	5	0	0	0
16:12007058:C:T	rs115762169	16	12007058	C	T	0.0174	0.9826	3.3e-06	-0.0490924	0.0106962	0.827829	rs149925099	56	GSPT1	0	intronic	1.367	3a	1	7	0	0	0
16:12009641:G:T	rs377309818	16	12009641	T	G	0.0174	0.9826	6.7e-06	-0.0472729	0.0106323	0.827829	rs149925099	56	GSPT1	0	UTR5	10.11	4	1	1	0	0	0
16:12011330:C:T	rs150013384	16	12011330	C	T	0.02118	0.97882	2.1e-05	-0.040949	0.0096023	0.931794	rs149925099	56	GSPT1	1390	intergenic	1.39	6	5	15	0	0	0
16:12031046:A:G	rs138170169	16	12031046	G	A	0.0174	0.9826	0.00081	-0.0288443	0.0089652	0.695742	rs149925099	56	RP11-166B2.1	0	intronic	1.967	7	7	15	0	0	0
16:12038066:A:G	rs150018142	16	12038066	A	G	0.0174	0.9826	0.00081	-0.028847	0.00896526	0.695742	rs149925099	56	RP11-166B2.1	0	intronic	2.908	7	14	15	0	0	0
16:12038749:C:T	rs146775214	16	12038749	C	T	0.0174	0.9826	0.00081	-0.028847	0.00896526	0.695742	rs149925099	56	RP11-166B2.1	0	intronic	5.808	5	7	15	0	0	0
16:12039424:A:C	16:12039424	16	12039424	C	A	0.0174	0.9826	0.00081	-0.028847	0.00896526	0.695742	rs149925099	56	RP11-166B2.1	0	intronic	1.025	7	7	15	0	0	0
16:12039767:A:T	rs76485668	16	12039767	T	A	0.0174	0.9826	0.00081	-0.028847	0.00896526	0.695742	rs149925099	56	RP11-166B2.1	0	intronic	2.211	7	7	15	0	0	0
16:12040023:A:G	rs146104960	16	12040023	A	G	0.0174	0.9826	0.00081	-0.028847	0.00896526	0.695742	rs149925099	56	RP11-166B2.1	0	intronic	1.752	6	5	15	0	0	0
16:12040144:A:T	rs545791898	16	12040144	T	A	0.0174	0.9826	0.00081	-0.028847	0.00896526	0.695742	rs149925099	56	RP11-166B2.1	0	intronic	1.078	NA	5	15	0	0	0
16:12041851:A:C	rs114521227	16	12041851	C	A	0.0174	0.9826	0.00084	-0.0286863	0.00894741	0.695742	rs149925099	56	RP11-166B2.1	0	intronic	9.004	5	4	15	0	0	0
16:12046262:C:T	rs143133156	16	12046262	C	T	0.0174	0.9826	0.0012	-0.0278427	0.00892616	0.695742	rs149925099	56	RP11-166B2.1	0	intronic	0.285	5	5	15	0	0	0
16:12047195:A:T	rs140202343	16	12047195	A	T	0.0174	0.9826	0.0011	-0.0278919	0.00891912	0.695742	rs149925099	56	RP11-166B2.1	0	intronic	1.784	6	5	15	0	0	0
16:12048086:G:T	rs188531480	16	12048086	T	G	0.01664	0.98336	0.0011	-0.0278948	0.00891906	0.662053	rs149925099	56	RP11-166B2.1	0	intronic	0.846	6	5	15	0	0	0
16:12048964:A:G	rs146408784	16	12048964	A	G	0.01664	0.98336	0.0011	-0.0278948	0.00891906	0.662053	rs149925099	56	RP11-166B2.1	0	intronic	2.311	7	5	15	0	0	0
16:12049503:C:G	rs146650490	16	12049503	C	G	0.01664	0.98336	0.0011	-0.0278948	0.00891906	0.662053	rs149925099	56	RP11-166B2.1	0	intronic	0.086	5	2	15	0	0	0
16:12050352:C:G	rs138270055	16	12050352	C	G	0.01664	0.98336	0.0011	-0.0279855	0.00891932	0.662053	rs149925099	56	RP11-166B2.1	0	intronic	0.366	7	5	15	0	0	0
16:12057753:A:G	rs139001731	16	12057753	A	G	0.01513	0.98487	0.0014	-0.0272979	0.00894281	0.658808	rs149925099	56	RP11-166B2.1	0	intronic	0.012	5	2	15	0	0	0
16:12059629:G:T	rs115493339	16	12059629	T	G	0.01437	0.98563	0.0017	-0.0268293	0.00895917	0.625181	rs149925099	56	RP11-166B2.1:TNFRSF17	00:00:00	intronic	1.157	7	1	15	0	0	0
16:12062572:A:C	rs149805155	16	12062572	A	C	0.01437	0.98563	0.0015	-0.0272063	0.00893105	0.625181	rs149925099	56	RP11-166B2.1:UBL5P4	00:00:00	ncRNA_exonic	4.733	4	3	15	0	0	0
16:12064353:A:G	rs147141474	16	12064353	A	G	0.01437	0.98563	0.0012	-0.0277717	0.00892155	0.625181	rs149925099	56	RP11-166B2.1	0	intronic	0.564	3a	5	15	0	0	0
16:12065057:A:G	rs115878653	16	12065057	G	A	0.01437	0.98563	0.0012	-0.0277717	0.00892155	0.625181	rs149925099	56	RP11-166B2.1	0	intronic	3.669	6	4	15	0	0	0
16:12065414:A:C	rs148992440	16	12065414	A	C	0.01437	0.98563	0.0012	-0.0277717	0.00892155	0.625181	rs149925099	56	RP11-166B2.1	0	intronic	3.313	6	4	15	0	0	0
16:12065864:A:G	rs141147417	16	12065864	A	G	0.01437	0.98563	0.0012	-0.0277717	0.00892155	0.625181	rs149925099	56	RP11-166B2.1	0	intronic	2.677	6	4	15	0	0	0
16:12066331:C:G	rs114729066	16	12066331	C	G	0.01437	0.98563	0.032	-0.0148146	0.00766472	0.625181	rs149925099	56	RP11-166B2.1	0	intronic	1.271	5	2	15	0	0	0
16:12066789:A:G	rs142890348	16	12066789	A	G	0.01437	0.98563	0.0013	-0.0275045	0.00892497	0.625181	rs149925099	56	RP11-166B2.1	0	intronic	3.935	6	4	15	0	0	0
16:12158574:C:T	rs190770959	16	12158574	T	C	0.01513	0.98487	6.3e-09	-0.0564586	0.00986159	1	rs190770959	57	SNX29	0	intronic	4.743	5	4	5	0	0	0
16:12158638:C:T	rs571483068	16	12158638	T	C	0.01891	0.98109	2.1e-06	-0.0422254	0.00900326	0.79376	rs190770959	57	SNX29	0	intronic	5.366	NA	4	5	0	0	0
16:12171475:C:T	rs147978408	16	12171475	C	T	0.01589	0.98411	6.6e-09	-0.0551339	0.00963123	0.950895	rs190770959	57	SNX29	0	intronic	1.962	5	4	5	0	0	0
16:12189771:C:T	rs145263412	16	12189771	T	C	0.01589	0.98411	1.7e-05	-0.0385544	0.00906492	0.764619	rs190770959	57	SNX29	0	intronic	8.218	5	1	7	0	0	0
16:12195640:A:T	rs116917526	16	12195640	T	A	0.01815	0.98185	0.0024	-0.0280956	0.0093971	0.665183	rs190770959	57	SNX29	0	intronic	0.548	5	4	15	0	0	0
16:12212483:C:G	rs146851461	16	12212483	G	C	0.01664	0.98336	0.0011	-0.0313434	0.00978383	0.728461	rs190770959	57	SNX29	0	intronic	2.278	5	4	5	0	0	0
16:12214203:C:T	rs8044822	16	12214203	T	C	0.01664	0.98336	0.00061	-0.0328432	0.00977071	0.728461	rs190770959	57	SNX29	0	intronic	21.5	4	2	5	1	0	1
16:12216771:C:T	rs150008902	16	12216771	T	C	0.01664	0.98336	0.0006	-0.0328719	0.00977492	0.728461	rs190770959	57	SNX29	0	intronic	0.489	7	4	5	0	0	0
16:12222468:C:G	rs141605153	16	12222468	G	C	0.01664	0.98336	0.00059	-0.0329538	0.00978678	0.728461	rs190770959	57	SNX29	0	intronic	1.222	6	4	5	0	0	0
16:12224075:C:T	rs56780928	16	12224075	C	T	0.01815	0.98185	0.00064	-0.0303984	0.00910208	0.665183	rs190770959	57	SNX29	0	intronic	1.961	6	4	5	0	0	0
16:12227445:C:G	rs139706387	16	12227445	C	G	0.01664	0.98336	0.0006	-0.0328719	0.00977492	0.728461	rs190770959	57	SNX29	0	intronic	0.391	6	4	5	0	0	0
16:12230257:C:T	rs141888266	16	12230257	T	C	0.01362	0.98638	0.00062	-0.0327683	0.00976337	0.797346	rs190770959	57	SNX29	0	intronic	5.374	5	4	5	0	0	0
16:12230793:C:G	rs9673762	16	12230793	G	C	0.01815	0.98185	0.033	-0.0148399	0.00757819	0.665183	rs190770959	57	SNX29	0	intronic	1.528	7	4	5	0	0	0
16:12231067:A:G	rs9673132	16	12231067	G	A	0.01815	0.98185	0.016	-0.0164603	0.00743859	0.665183	rs190770959	57	SNX29	0	intronic	2.231	5	4	5	0	0	0
16:12231570:C:G	rs74665491	16	12231570	C	G	0.01815	0.98185	0.00059	-0.0305595	0.00908578	0.665183	rs190770959	57	SNX29	0	intronic	2.062	5	4	5	0	0	0
16:12233215:C:T	rs139888009	16	12233215	T	C	0.01664	0.98336	0.0005	-0.033315	0.00974969	0.728461	rs190770959	57	SNX29	0	intronic	4.823	5	4	5	0	0	0
16:12235549:A:G	rs7206245	16	12235549	A	G	0.01664	0.98336	0.00051	-0.0332694	0.00975178	0.728461	rs190770959	57	SNX29	0	intronic	4.336	5	4	5	0	0	0
16:12236577:C:T	rs185309854	16	12236577	T	C	0.01664	0.98336	0.017	-0.0172041	0.0077746	0.728461	rs190770959	57	SNX29	0	intronic	2.796	5	5	5	0	0	0
16:12236661:C:T	rs189762986	16	12236661	T	C	0.01664	0.98336	0.017	-0.0172041	0.0077746	0.728461	rs190770959	57	SNX29	0	intronic	2.72	2b	5	5	0	0	0
16:12237488:A:T	rs139604392	16	12237488	A	T	0.01664	0.98336	0.033	-0.0154124	0.00789882	0.728461	rs190770959	57	SNX29	0	intronic	5.435	5	4	5	0	0	0
16:12237502:A:T	rs143523827	16	12237502	A	T	0.01664	0.98336	0.033	-0.0154124	0.00789882	0.728461	rs190770959	57	SNX29	0	intronic	5.439	7	4	5	0	0	0
16:12237516:C:T	rs147154249	16	12237516	T	C	0.01664	0.98336	0.033	-0.0154124	0.00789882	0.728461	rs190770959	57	SNX29	0	intronic	3.713	7	4	5	0	0	0
16:12237534:A:G	rs140306549	16	12237534	G	A	0.01664	0.98336	0.0014	-0.0312961	0.0100114	0.728461	rs190770959	57	SNX29	0	intronic	3.014	6	4	5	0	0	0
16:12238145:C:G	rs140959309	16	12238145	G	C	0.01664	0.98336	0.016	-0.0172761	0.00777326	0.728461	rs190770959	57	SNX29	0	intronic	3.413	6	4	5	0	0	0
16:12238270:A:G	rs145699060	16	12238270	G	A	0.01664	0.98336	0.0005	-0.0333299	0.0097479	0.728461	rs190770959	57	SNX29	0	intronic	2.177	2b	4	5	0	0	0
16:12238767:A:G	rs138968355	16	12238767	G	A	0.01589	0.98411	0.0005	-0.0333299	0.0097479	0.679088	rs190770959	57	SNX29	0	intronic	2.089	7	4	5	0	0	0
16:12244523:A:G	rs146862873	16	12244523	A	G	0.01589	0.98411	0.0011	-0.0318913	0.00990792	0.764619	rs190770959	57	SNX29	0	intronic	4.777	4	4	5	0	0	0
16:12244913:A:T	rs150327004	16	12244913	A	T	0.01664	0.98336	0.0011	-0.0318782	0.00990806	0.728461	rs190770959	57	SNX29	0	intronic	0.475	5	4	5	0	0	0
16:12251129:C:G	rs144672809	16	12251129	C	G	0.01437	0.98563	9.9e-05	-0.0404689	0.0106375	0.753777	rs190770959	57	SNX29	0	intronic	1.592	5	4	15	0	0	0
16:12271225:C:T	rs141023054	16	12271225	T	C	0.01513	0.98487	9.7e-05	-0.0395645	0.0103906	0.714566	rs190770959	57	SNX29	0	intronic	3.817	5	5	15	0	0	0
16:12275878:C:T	rs145813792	16	12275878	T	C	0.01513	0.98487	0.00012	-0.0386657	0.0102823	0.714566	rs190770959	57	SNX29	0	intronic	3.133	7	5	15	0	0	0
16:12291952:C:G	rs142719950	16	12291952	G	C	0.01664	0.98336	0.00012	-0.0366466	0.00979123	0.646837	rs190770959	57	SNX29	0	intronic	2.145	5	4	15	0	0	0
16:12293011:G:T	rs143641680	16	12293011	T	G	0.01513	0.98487	0.00017	-0.0380394	0.0103557	0.714566	rs190770959	57	SNX29	0	intronic	0.189	7	4	15	0	0	0
16:12310170:C:T	rs142253972	16	12310170	C	T	0.01362	0.98638	0.003	-0.0274889	0.00945958	0.70338	rs190770959	57	SNX29	0	intronic	4.738	5	4	15	0	0	0
16:12312473:G:T	rs140481225	16	12312473	T	G	0.01437	0.98563	0.0036	-0.0265559	0.00931496	0.664788	rs190770959	57	SNX29	0	intronic	0.144	7	4	15	0	0	0
16:12312910:C:T	rs182266500	16	12312910	C	T	0.01437	0.98563	0.00029	-0.0363906	0.0103381	0.664788	rs190770959	57	SNX29	0	intronic	4.712	6	4	15	0	0	0
16:12313534:A:G	rs140604540	16	12313534	G	A	0.01362	0.98638	0.0002	-0.0374567	0.0103483	0.70338	rs190770959	57	SNX29	0	intronic	1.937	7	4	15	0	0	0
16:12314337:C:G	rs183560256	16	12314337	G	C	0.01362	0.98638	0.00025	-0.036636	0.0102852	0.70338	rs190770959	57	SNX29	0	intronic	3.255	5	4	15	0	0	0
16:12316002:A:G	rs143464907	16	12316002	A	G	0.01437	0.98563	0.0018	-0.0262635	0.00893475	0.664788	rs190770959	57	SNX29	0	intronic	4.321	7	4	15	0	0	0
16:12318429:A:G	rs139044763	16	12318429	A	G	0.01362	0.98638	0.00028	-0.036072	0.0102157	0.70338	rs190770959	57	SNX29	0	intronic	1.272	5	4	15	0	0	0
16:12318917:C:G	rs145920056	16	12318917	G	C	0.01362	0.98638	0.00029	-0.0360117	0.0102227	0.70338	rs190770959	57	SNX29	0	intronic	7.116	5	4	15	0	0	0
16:12320056:A:G	rs146110542	16	12320056	A	G	0.01362	0.98638	0.00029	-0.0360117	0.0102227	0.70338	rs190770959	57	SNX29	0	intronic	5.067	3a	5	15	0	0	0
16:12322525:A:G	rs150886017	16	12322525	A	G	0.01437	0.98563	0.0019	-0.0260889	0.00890939	0.664788	rs190770959	57	SNX29	0	intronic	1.881	4	2	15	0	0	0
16:12327191:C:T	rs192229902	16	12327191	T	C	0.01362	0.98638	0.00033	-0.0360755	0.0103272	0.70338	rs190770959	57	SNX29	0	intronic	0.999	5	4	5	0	0	0
16:12327643:A:G	rs146841967	16	12327643	A	G	0.01362	0.98638	0.00033	-0.0360755	0.0103272	0.70338	rs190770959	57	SNX29	0	intronic	2.322	6	4	5	0	0	0
16:12328587:A:G	rs149960245	16	12328587	A	G	0.01362	0.98638	0.00033	-0.0360755	0.0103272	0.70338	rs190770959	57	SNX29	0	intronic	1.75	6	5	5	0	0	0
16:12329126:C:T	rs141256819	16	12329126	T	C	0.01437	0.98563	0.00048	-0.0309986	0.00931484	0.664788	rs190770959	57	SNX29	0	intronic	6.798	5	2	15	0	0	0
16:12329370:A:G	rs139257783	16	12329370	G	A	0.01362	0.98638	0.00033	-0.0360755	0.0103272	0.70338	rs190770959	57	SNX29	0	intronic	3.59	3a	1	15	0	0	0
16:12334318:A:T	rs145164895	16	12334318	A	T	0.01362	0.98638	0.0004	-0.0356077	0.0103411	0.70338	rs190770959	57	SNX29	0	intronic	0.635	5	2	15	0	0	0
16:12334513:A:G	rs139042137	16	12334513	A	G	0.01362	0.98638	0.0004	-0.0356077	0.0103411	0.70338	rs190770959	57	SNX29	0	intronic	2.23	7	2	15	0	0	0
16:12334514:C:T	rs140500734	16	12334514	T	C	0.01362	0.98638	0.00043	-0.035395	0.0103419	0.70338	rs190770959	57	SNX29	0	intronic	0.939	7	2	15	0	0	0
16:12337436:G:T	rs149257407	16	12337436	G	T	0.01362	0.98638	0.00032	-0.0365847	0.0104466	0.70338	rs190770959	57	SNX29	0	intronic	0.08	7	4	15	0	0	0
16:12337992:A:G	rs142979910	16	12337992	A	G	0.01362	0.98638	0.00032	-0.0365847	0.0104466	0.70338	rs190770959	57	SNX29	0	intronic	4.373	6	4	15	0	0	0
16:12338791:C:T	rs143184243	16	12338791	C	T	0.01362	0.98638	0.00033	-0.0365258	0.0104463	0.70338	rs190770959	57	SNX29	0	intronic	10.31	6	4	15	0	0	0
16:12339056:C:T	rs148283648	16	12339056	T	C	0.01437	0.98563	0.00029	-0.0371302	0.0105058	0.664788	rs190770959	57	SNX29	0	intronic	0.958	7	4	15	0	0	0
16:12339092:C:T	rs141143298	16	12339092	T	C	0.01362	0.98638	0.00029	-0.0370785	0.0105056	0.70338	rs190770959	57	SNX29	0	intronic	3.603	7	4	15	0	0	0
16:12339786:C:T	rs146350571	16	12339786	T	C	0.01362	0.98638	0.00029	-0.0370785	0.0105056	0.70338	rs190770959	57	SNX29	0	intronic	1.248	5	5	15	0	0	0
16:12342911:C:T	rs142408284	16	12342911	T	C	0.01362	0.98638	0.00028	-0.0374168	0.0105529	0.70338	rs190770959	57	SNX29	0	intronic	1.704	5	4	15	0	0	0
16:12343457:C:G	rs150673873	16	12343457	G	C	0.01362	0.98638	0.00024	-0.0377512	0.0105418	0.70338	rs190770959	57	SNX29	0	intronic	1.435	5	4	15	0	0	0
16:12345341:C:T	rs149276495	16	12345341	T	C	0.01362	0.98638	0.00021	-0.0379703	0.0105161	0.70338	rs190770959	57	SNX29	0	intronic	2.942	6	5	15	0	0	0
16:12346289:A:T	rs140229668	16	12346289	A	T	0.01362	0.98638	0.00021	-0.0379703	0.0105161	0.70338	rs190770959	57	SNX29	0	intronic	8.75	7	5	15	0	0	0
16:12347802:A:C	rs150323494	16	12347802	A	C	0.01362	0.98638	0.00021	-0.0379703	0.0105161	0.70338	rs190770959	57	SNX29	0	intronic	0.958	5	5	15	0	0	0
16:12358654:C:G	rs141453055	16	12358654	C	G	0.01437	0.98563	0.00019	-0.0381884	0.010489	0.664788	rs190770959	57	SNX29	0	intronic	0.955	7	4	15	0	0	0
16:12360733:G:T	rs137906294	16	12360733	T	G	0.01437	0.98563	0.00019	-0.0381884	0.010489	0.664788	rs190770959	57	SNX29	0	intronic	1.618	7	4	15	0	0	0
16:12362874:C:T	rs150515640	16	12362874	T	C	0.01437	0.98563	0.00024	-0.03766	0.0104974	0.664788	rs190770959	57	SNX29	0	intronic	5.026	5	4	15	0	0	0
16:12367100:C:G	rs140859860	16	12367100	G	C	0.01437	0.98563	0.00028	-0.0368591	0.0104168	0.664788	rs190770959	57	SNX29	0	intronic	1.651	7	5	15	0	0	0
16:12367563:A:T	rs137920219	16	12367563	T	A	0.01437	0.98563	0.00027	-0.0374068	0.0105153	0.664788	rs190770959	57	SNX29	0	intronic	1.89	6	5	15	0	0	0
16:12369976:C:G	rs189326825	16	12369976	G	C	0.01437	0.98563	0.00027	-0.0373886	0.010514	0.664788	rs190770959	57	SNX29	0	intronic	3.825	6	5	15	0	0	0
16:12371786:A:G	rs139247529	16	12371786	G	A	0.01437	0.98563	0.00027	-0.037416	0.010514	0.664788	rs190770959	57	SNX29	0	intronic	13.33	7	4	15	1	0	0
16:12372231:A:T	rs149557476	16	12372231	T	A	0.01437	0.98563	0.00039	-0.0364705	0.0105456	0.664788	rs190770959	57	SNX29	0	intronic	0.785	7	4	15	0	0	0
16:12389668:A:T	rs540640678	16	12389668	A	T	0.01437	0.98563	0.00041	-0.036417	0.010553	0.664788	rs190770959	57	SNX29	0	intronic	3.591	NA	4	15	0	0	0
17:26295337:A:G	rs8076066	17	26295337	G	A	0.1316	0.8684	0.0024	-0.0119904	0.0039172	0.604457	rs4239212	58	RP11-218F4.1	0	ncRNA_intronic	1.346	2b	5	15	0	0	0
17:26303078:A:T	rs7214317	17	26303078	T	A	0.1369	0.8631	0.0015	-0.0123738	0.00388555	0.612421	rs4239212	58	RP11-218F4.1	1828	intergenic	0.004	6	5	15	0	0	0
17:26309472:C:T	rs4589609	17	26309472	T	C	0.09985	0.90015	5.3e-05	-0.0197481	0.00503732	0.828188	rs4239212	58	RP11-218F4.1	8222	intergenic	12.03	4	5	14	0	0	0
17:26309966:A:G	rs4239212	17	26309966	G	A	0.09228	0.90772	3.7e-07	-0.0253061	0.00503746	1	rs4239212	58	RP11-218F4.1	8716	intergenic	0.128	2a	5	14	0	0	0
17:26310065:C:T	rs6416969	17	26310065	T	C	0.118	0.882	2e-05	-0.0190523	0.00452769	0.751687	rs4239212	58	RP11-218F4.1	8815	intergenic	11	3a	5	14	0	0	0
17:66009034:A:G	17:66009034	17	66009034	G	A	0.0469	0.9531	0.0036	-0.017107	0.00625744	0.672643	17:66046250	59	RP11-855A2.5	16486	intergenic	0.871	7	5	15	0	0	0
17:66025691:A:C	17:66025691	17	66025691	A	C	0.04917	0.95083	0.0013	-0.019903	0.00649663	0.720201	17:66046250	59	KPNA2	5943	intergenic	7.312	2b	1	15	0	0	0
17:66046250:C:T	17:66046250	17	66046250	T	C	0.03858	0.96142	9.9e-06	-0.039424	0.00905376	1	17:66046250	59	KPNA2	3291	intergenic	4.246	3a	5	5	0	0	0
17:66047753:A:G	17:66047753	17	66047753	A	G	0.05673	0.94327	0.00018	-0.0240468	0.00654307	0.654278	17:66046250	59	KPNA2	4794	intergenic	6.029	6	5	5	0	0	0
17:66048912:C:G	17:66048912	17	66048912	G	C	0.05446	0.94554	0.00026	-0.0233435	0.00651456	0.602112	17:66046250	59	KPNA2	5953	intergenic	3.134	7	2	5	0	0	0
17:66058258:A:T	17:66058258	17	66058258	A	T	0.05446	0.94554	0.00027	-0.0232764	0.0065209	0.602112	17:66046250	59	KPNA2	15299	intergenic	9.761	3a	5	15	0	0	0
17:66074957:C:T	rs111286119	17	66074957	T	C	0.03933	0.96067	0.00074	-0.0258009	0.00791637	0.832921	17:66046250	59	LOC732538	16251	intergenic	0.327	7	14	15	0	0	0
17:66079124:A:G	17:66079124	17	66079124	G	A	0.03707	0.96293	0.001	-0.0252592	0.00796676	0.775638	17:66046250	59	LOC732538	12084	intergenic	5.193	6	5	15	0	0	0
17:66085355:G:T	17:66085355	17	66085355	T	G	0.03555	0.96445	0.00019	-0.0307264	0.00845208	0.809078	17:66046250	59	LOC732538	5853	intergenic	4.944	6	5	15	0	0	0
17:66097044:A:T	17:66097044	17	66097044	A	T	0.03782	0.96218	0.0011	-0.0245871	0.00779272	0.759847	17:66046250	59	AC145343.2	0	ncRNA_intronic	2.974	5	1	7	0	0	0
17:66174379:A:G	17:66174379	17	66174379	G	A	0.02648	0.97352	1.2e-05	-0.0307783	0.00726971	0.827178	17:66189362	60	RP11-147L13.8	11645	intergenic	10.18	5	5	15	0	0	0
17:66176452:A:G	17:66176452	17	66176452	A	G	0.02648	0.97352	1.2e-05	-0.030762	0.00726977	0.827178	17:66189362	60	RP11-147L13.8	9572	intergenic	3.262	5	5	15	0	0	0
17:66177275:C:T	17:66177275	17	66177275	T	C	0.02648	0.97352	1.5e-05	-0.0303923	0.00726623	0.827178	17:66189362	60	RP11-147L13.8	8749	intergenic	2.207	5	1	15	0	0	0
17:66189362:C:T	17:66189362	17	66189362	T	C	0.02648	0.97352	1.7e-06	-0.0322827	0.00700502	1	17:66189362	60	RP11-147L13.8	418	downstream	9.559	5	5	14	0	0	0
17:71005194:C:T	rs7225039	17	71005194	T	C	0.4992	0.5008	8.9e-06	-0.0121639	0.00279038	1	rs7225039	61	SLC39A11	0	intronic	3.608	6	5	15	0	0	0
18:46364448:G:T	rs73956041	18	46364448	G	T	0.0121	0.9879	5.6e-06	-0.0501458	0.0113719	1	rs73956041	62	CTIF	0	intronic	2.526	5	4	5	0	0	0
18:54747796:A:G	rs116598544	18	54747796	G	A	0.02194	0.97806	1.8e-06	-0.0460606	0.00950152	1	rs116598544	63	LINC-ROR	8445	intergenic	4.007	4	5	14	0	0	0
19:21319468:C:T	rs147462408	19	21319468	C	T	0.02648	0.97352	0.00043	-0.0279416	0.00794202	0.780752	rs185596787	64	ZNF431	5358	intergenic	0.886	7	5	15	0	0	0
19:21353028:A:C	rs116745966	19	21353028	A	C	0.03858	0.96142	0.00081	-0.0233716	0.00693164	0.657113	rs185596787	64	ZNF431	0	intronic	4.361	5	4	4	0	0	0
19:21367320:A:T	rs183597919	19	21367320	T	A	0.03707	0.96293	0.00038	-0.0260791	0.00726998	0.683771	rs185596787	64	ZNF431	0	UTR3	4.122	7	4	5	0	0	0
19:21403747:A:T	rs11880246	19	21403747	A	T	0.02572	0.97428	7e-05	-0.0327545	0.00823586	0.97085	rs185596787	64	CTD-3233P19.8	699	downstream	7.455	7	5	15	0	0	0
19:21410891:A:C	rs148382461	19	21410891	A	C	0.02648	0.97352	5.4e-05	-0.0331559	0.00820711	0.943276	rs185596787	64	CTD-3233P19.7	0	ncRNA_intronic	NA	6	5	15	0	0	0
19:21452765:C:T	rs144003057	19	21452765	T	C	0.02799	0.97201	1.8e-05	-0.0345532	0.00805847	0.892372	rs185596787	64	CTD-3030D20.1	6059	intergenic	3.154	3a	1	15	0	0	0
19:21474645:C:T	rs144961826	19	21474645	T	C	0.02496	0.97504	1e-05	-0.0349398	0.00794195	1	rs185596787	64	ZNF708	0	UTR3	0.019	7	4	9	0	0	0
19:21508121:C:T	rs185596787	19	21508121	C	T	0.02496	0.97504	4.3e-06	-0.0396507	0.00854806	1	rs185596787	64	ZNF708	0	intronic	3.147	5	4	5	0	0	0
19:21509658:C:T	rs11879313	19	21509658	T	C	0.02572	0.97428	4.4e-06	-0.0396246	0.00854747	0.97085	rs185596787	64	ZNF708	0	intronic	2.946	6	4	5	0	0	0
19:21512646:C:T	rs190321065	19	21512646	T	C	0.03101	0.96899	9.6e-05	-0.0307582	0.00784598	0.80477	rs185596787	64	ZNF708	418	upstream	0.143	6	2	15	0	0	0
19:21516113:C:T	rs146046445	19	21516113	T	C	0.03101	0.96899	9.6e-05	-0.0307582	0.00784598	0.80477	rs185596787	64	ZNF708	3885	intergenic	4.448	6	9	15	0	0	0
19:21517688:A:C	rs116404209	19	21517688	A	C	0.03101	0.96899	9.6e-05	-0.0307582	0.00784598	0.80477	rs185596787	64	ZNF708	5460	intergenic	11.03	6	8	9	0	0	0
19:21518058:C:T	rs115222862	19	21518058	C	T	0.03101	0.96899	8.6e-05	-0.0309447	0.00784399	0.80477	rs185596787	64	ZNF708	5830	intergenic	9.417	7	8	9	0	0	0
19:21539253:A:G	rs149192955	19	21539253	G	A	0.03026	0.96974	7e-05	-0.0313512	0.00784328	0.775862	rs185596787	64	ZNF738	2478	intergenic	10.16	7	5	15	0	0	0
19:21554605:A:G	rs115691680	19	21554605	A	G	0.03026	0.96974	7.6e-05	-0.0310904	0.00781826	0.775862	rs185596787	64	ZNF738	0	intronic	5.461	7	4	5	0	0	0
19:21564053:A:G	rs61753928	19	21564053	A	G	0.03026	0.96974	9.7e-05	-0.0305082	0.00778118	0.775862	rs185596787	64	CTD-2561J22.1	0	ncRNA_exonic	8.301	6	4	9	0	0	0
19:21568172:C:T	rs147978877	19	21568172	T	C	0.03026	0.96974	0.00011	-0.0302549	0.00776725	0.728132	rs185596787	64	CTD-2561J22.2	0	ncRNA_intronic	0.24	7	5	9	0	0	0
19:21572668:C:T	rs141908324	19	21572668	T	C	0.0295	0.9705	0.0001	-0.0302192	0.00773938	0.737891	rs185596787	64	CTD-2561J22.2	2688	intergenic	6.514	2c	5	9	0	0	0
19:21583495:A:G	rs77627909	19	21583495	G	A	0.03177	0.96823	0.00082	-0.026646	0.00792854	0.68166	rs185596787	64	ZNF493	0	intronic	3.485	7	3	5	0	0	0
19:21585004:C:T	rs535850503	19	21585004	C	T	0.03177	0.96823	2e-05	-0.0325919	0.00757734	0.68166	rs185596787	64	ZNF493	0	intronic	1.541	NA	4	5	0	0	0
19:21585020:C:T	rs548204248	19	21585020	C	T	0.03177	0.96823	2e-05	-0.0325919	0.00757734	0.68166	rs185596787	64	ZNF493	0	intronic	1.946	NA	4	5	0	0	0
19:21610615:C:T	rs142465155	19	21610615	T	C	0.03101	0.96899	2.5e-05	-0.0316195	0.00744502	0.699489	rs185596787	64	CTD-2561J22.3	0	intronic	2.351	6	5	9	0	0	0
19:21614933:A:G	rs146803654	19	21614933	G	A	0.03101	0.96899	3.4e-05	-0.0311012	0.00744981	0.699489	rs185596787	64	CTD-2561J22.3	0	intronic	1.498	6	5	9	0	0	0
19:21621704:C:T	rs145226191	19	21621704	T	C	0.03328	0.96672	1.1e-05	-0.0329819	0.00744627	0.648433	rs185596787	64	CTD-2561J22.3	0	intronic	0.413	7	2	15	0	0	0
19:21623634:C:T	rs57705728	19	21623634	C	T	0.03253	0.96747	2.1e-05	-0.0319995	0.00745803	0.66466	rs185596787	64	CTD-2561J22.3	0	intronic	5.435	6	1	15	0	0	0
19:21658289:A:G	rs58259941	19	21658289	A	G	0.03328	0.96672	2.5e-05	-0.0317421	0.00747664	0.648433	rs185596787	64	CTD-2561J22.3	0	intronic	3.08	7	1	15	0	0	0
20:1883451:A:G	rs6045318	20	1883451	G	A	0.02421	0.97579	7.1e-07	-0.0398757	0.00811929	1	rs6045318	65	SIRPA	0	intronic	5.604	7	4	5	0	0	0
21:17759799:C:T	rs7276948	21	17759799	C	T	0.1082	0.8918	0.00011	-0.0156284	0.00407619	0.668598	rs8129609	66	LINC00478	0	ncRNA_intronic	3.741	6	5	15	0	0	0
21:17763197:C:T	rs8129609	21	17763197	C	T	0.1573	0.8427	6.3e-06	-0.015811	0.00350188	1	rs8129609	66	LINC00478	0	ncRNA_intronic	3.416	6	5	15	0	0	0
21:17763748:G:T	rs2823771	21	17763748	G	T	0.1989	0.8011	1.6e-05	-0.0142386	0.00328355	0.771658	rs8129609	66	LINC00478	0	ncRNA_intronic	11.02	6	4	15	0	0	0
