# Supplementary material for: Genetic associations with carotid intima-media thickness link to atherosclerosis biology with sex-differences in sub-Saharan Africans
Source: Research Square preprint supplement (doi:10.21203/rs.3.rs-147838/v1), 2021-01-22
Supplement: Supplementary file 14 [file f7b4605e8ba56902836f9ec3.xlsx]

## Sheet: genes
ensg	symbol	chr	start	end	strand	type	entrezID	HUGO	pLI	ncRVIS	posMapSNPs	posMapMaxCADD	eqtlMapSNPs	eqtlMapminP	eqtlMapminQ	eqtlMapts	eqtlDirection	ciMap	ciMapts	minGwasP	IndSigSNPs	GenomicLocus
ENSG00000186314	PRELID2	5	144851362	145214932	-1	protein_coding	153768	PRELID2	1.73073934677441e-05	0.480158135	1	14.17	0	NA	NA	NA	NA	No	NA	6.6e-06	5:145143045	26
ENSG00000112782	CLIC5	6	45868045	46048132	-1	protein_coding	53405	CLIC5	0.00187685115916181	0.204291409	0	0	0	NA	NA	NA	NA	Yes	IMR90	0.012	rs6914280	27
ENSG00000172348	RCAN2	6	46188475	46459709	-1	protein_coding	10231	RCAN2	0.430936968293151	-0.297448334	0	0	0	NA	NA	NA	NA	Yes	Mesenchymal_Stem_Cell	0.012	rs6914280	27
ENSG00000236466	RP11-795J1.1	6	46459789	46500495	1	antisense	NA	NA	NA	NA	0	0	0	NA	NA	NA	NA	Yes	Mesenchymal_Stem_Cell	0.012	rs6914280	27
ENSG00000112818	MEP1A	6	46761127	46807515	1	protein_coding	4224	MEP1A	5.76708569342659e-07	0.316333198	0	0	0	NA	NA	NA	NA	Yes	IMR90:Mesenchymal_Stem_Cell	0.012	rs6914280	27
ENSG00000069122	GPR116	6	46820249	46922680	-1	protein_coding	221395	GPR116	0.990814985963621	-0.049238151	0	0	0	NA	NA	NA	NA	Yes	Mesenchymal_Stem_Cell	0.012	rs6914280	27
ENSG00000270761	RP11-385F7.1	6	47444979	47445308	-1	lincRNA	NA	NA	NA	NA	0	0	0	NA	NA	NA	NA	Yes	Mesenchymal_Stem_Cell	0.012	rs6914280	27
ENSG00000198087	CD2AP	6	47445525	47594999	1	protein_coding	23607	CD2AP	0.813221347122531	0.233036187	0	0	0	NA	NA	NA	NA	Yes	Mesenchymal_Stem_Cell	0.012	rs6914280	27
ENSG00000164393	GPR111	6	47624172	47665533	1	protein_coding	222611	GPR111	2.1438019263369e-11	NA	3	20.9	3	1.15486e-38	1.56956e-44	GTEx_v6_Artery_Tibial:GTEx_v6_Esophagus_Muscularis:GTEx_v6_Heart_Atrial_Appendage:GTEx_v6_Heart_Left_Ventricle:GTEx_v6_Muscle_Skeletal:GTEx_v6_Testis:GTEx_v7_Artery_Tibial:GTEx_v7_Esophagus_Mucosa:GTEx_v7_Esophagus_Muscularis:GTEx_v7_Heart_Atrial_Appendage:GTEx_v7_Heart_Left_Ventricle:GTEx_v7_Muscle_Skeletal:GTEx_v7_Ovary:GTEx_v7_Testis:GTEx_v7_Vagina	-	No	NA	0.0087	rs6914280	27
ENSG00000153294	GPR115	6	47653600	47689757	1	protein_coding	221393	GPR115	3.9103549200985e-06	-0.866417694	3	20.9	3	1.00805e-27	2.10071e-31	GTEx_v6_Brain_Cerebellum:GTEx_v6_Heart_Atrial_Appendage:GTEx_v6_Heart_Left_Ventricle:GTEx_v6_Muscle_Skeletal:GTEx_v6_Skin_Sun_Exposed_Lower_leg:GTEx_v6_Testis:GTEx_v7_Artery_Coronary:GTEx_v7_Artery_Tibial:GTEx_v7_Brain_Cerebellar_Hemisphere:GTEx_v7_Brain_Cerebellum:GTEx_v7_Colon_Sigmoid:GTEx_v7_Colon_Transverse:GTEx_v7_Esophagus_Mucosa:GTEx_v7_Esophagus_Muscularis:GTEx_v7_Heart_Atrial_Appendage:G…	-	No	NA	0.0087	rs6914280	27
ENSG00000124818	OPN5	6	47749718	47800516	1	protein_coding	221391	OPN5	0.948752683071951	0.472855387	0	0	3	8.36473122534008e-13	1.92455e-09	GTEx_v6_Heart_Left_Ventricle:GTEx_v7_Heart_Left_Ventricle	-	No	NA	0.0087	rs6914280	27
ENSG00000244694	PTCHD4	6	47845764	48036425	-1	protein_coding	442213	PTCHD4	0.00276059838903919	NA	0	0	0	NA	NA	NA	NA	Yes	hESC:Left_Ventricle:Mesenchymal_Stem_Cell:Mesendoderm	0.012	rs6914280	27
ENSG00000146085	MUT	6	49398073	49430904	-1	protein_coding	4594	MUT	5.92436972896757e-18	-0.574749977	0	0	0	NA	NA	NA	NA	Yes	hESC:IMR90:Left_Ventricle:Liver:Mesenchymal_Stem_Cell:Mesendoderm:Trophoblast-like_Cell	0.012	rs6914280	27
ENSG00000031691	CENPQ	6	49431091	49460820	1	protein_coding	55166	CENPQ	6.26744705048062e-07	0.209946844	0	0	0	NA	NA	NA	NA	Yes	hESC:IMR90:Left_Ventricle:Liver:Mesenchymal_Stem_Cell:Mesendoderm:Trophoblast-like_Cell	0.012	rs6914280	27
ENSG00000197261	C6orf141	6	49518113	49529620	1	protein_coding	135398	C6orf141	NA	-0.279686276	0	0	0	NA	NA	NA	NA	Yes	Mesenchymal_Stem_Cell	0.012	rs6914280	27
ENSG00000124490	CRISP2	6	49660073	49681274	-1	protein_coding	7180	CRISP2	7.55320333504596e-10	0.129350267	0	0	0	NA	NA	NA	NA	Yes	hESC:Mesenchymal_Stem_Cell:Mesendoderm	0.012	rs6914280	27
ENSG00000214643	DEFB133	6	49913814	49917157	-1	protein_coding	403339	DEFB133	NA	NA	0	0	0	NA	NA	NA	NA	Yes	hESC:Mesenchymal_Stem_Cell:Mesendoderm:Trophoblast-like_Cell	0.012	rs6914280	27
ENSG00000226733	RP11-397G17.1	6	50061424	50066995	1	lincRNA	NA	NA	NA	NA	0	0	0	NA	NA	NA	NA	Yes	hESC:Mesenchymal_Stem_Cell:Mesendoderm	0.012	rs6914280	27
ENSG00000155849	ELMO1	7	36893961	37488852	-1	protein_coding	9844	ELMO1	0.993000631915938	-1.165179495	2	14.67	0	NA	NA	NA	NA	Yes	hESC:Left_Ventricle:Liver:Mesendoderm	2.5e-05	rs1987067	30
ENSG00000213744	RPS10P14	7	37415125	37415626	1	pseudogene	646942	RPS10P14	NA	NA	1	14.67	0	NA	NA	NA	NA	No	NA	2.5e-05	rs1987067	30
ENSG00000108018	SORCS1	10	108333421	108924292	-1	protein_coding	114815	SORCS1	0.969565842045511	NA	1	19.34	0	NA	NA	NA	NA	Yes	hESC:IMR90:Left_Ventricle:Mesenchymal_Stem_Cell:Mesendoderm:Trophoblast-like_Cell	1.3e-07	rs11193156	44
ENSG00000203434	RP11-163F15.1	10	110307733	110321573	-1	lincRNA	NA	NA	NA	NA	0	0	0	NA	NA	NA	NA	Yes	hESC:IMR90:Mesenchymal_Stem_Cell:Mesendoderm	1.3e-07	rs11193156	44
ENSG00000263307	RP11-166B2.8	16	11945506	11989468	1	antisense	105371084	LOC105371084	NA	NA	1	18.75	0	NA	NA	NA	NA	No	NA	3e-06	rs149925099	56
ENSG00000103342	GSPT1	16	11961985	12009939	-1	protein_coding	2935	GSPT1	0.951655491719969	-1.53746852	1	18.75	0	NA	NA	NA	NA	No	NA	3e-06	rs149925099	56
ENSG00000048471	SNX29	16	12070594	12668146	1	protein_coding	92017	SNX29	1.78492586400224e-06	12.17004891	2	21.5	0	NA	NA	NA	NA	No	NA	0.00027	rs190770959	57
ENSG00000237515	SHISA9	16	12995477	13334272	1	protein_coding	729993	SHISA9	NA	NA	0	0	0	NA	NA	NA	NA	Yes	Mesenchymal_Stem_Cell	0.00061	rs190770959	57
